# Supplementary material for: Reconstructing the Genomic Content of Microbiome Taxa through Shotgun Metagenomic Deconvolution
Source: PLoS Comput Biol. 2013 Oct 17;9(10):e1003292. doi: 10.1371/journal.pcbi.1003292 (PMC3798274; doi:10.1371/journal.pcbi.1003292)
Supplement: Dataset S3 — Strain KO lengths, and strain and KO abundances for each sample for the simulated dataset based on HMP Mock Community B. Note that strain abundances are given as the apparent abundances generated from the relative abundances of 16S genes, equivalent to the actual abundances multiplied by the copy numbers. (XLS) [file pcbi.1003292.s003.xls]

## Sheet: Strain Abundances
	Sample 1	Sample 2	Sample 3	Sample 4	Sample 5	Sample 6	Sample 7	Sample 8	Sample 9	Sample 10	Sample 11	Sample 12	Sample 13	Sample 14	Sample 15	Sample 16	Sample 17	Sample 18	Sample 19	Sample 20
Actinomyces odontolyticus	0.01354	0.011234	0.0084473	0.013343	0.0064107	0.0034542	0.0021281	0.019834	0.020759	0.0098169	0.013151	0.0060619	0.0013864	0.00065757	0.00052712	0.0013358	0.0038994	0.018777	0.0006498	0.0048241
Acinetobacter baumannii	0.075266	0.0030591	0.036732	0.022653	0.075729	0.084584	0.095968	0.072317	0.051845	0.02659	0.038638	0.089961	0.021277	0.077117	0.064211	0.0764	0.043959	0.090797	0.055929	0.027821
Bacillus cereus	0.025324	0.17457	0.17687	0.10783	0.12803	0.07954	0.0011096	0.09792	0.077163	0.16038	0.19878	0.10059	0.15584	0.19096	0.10356	0.011408	0.22437	0.012473	0.21093	0.14187
Bacteroides vulgatus	0.10625	0.11201	0.10717	0.086911	0.070149	0.078798	0.10824	0.083535	0.075223	0.023738	0.076127	0.025208	0.0033161	0.097111	0.057982	0.011205	0.12647	0.10191	0.093366	0.035576
Clostridium beijerinckii	0.14713	0.16279	0.050371	0.22152	0.23408	0.049392	0.22832	0.13079	0.035927	0.17255	0.10022	0.24685	0.21082	0.02408	0.21861	0.16363	0.019039	0.074341	0.05314	0.22111
Deinococcus radiodurans	0.004863	0.038945	0.028289	0.051112	0.015632	0.038463	0.052001	0.0052989	0.010533	0.0098802	0.057497	0.057272	0.035521	0.013689	0.031578	0.0065019	0.026937	0.025029	0.02206	0.056478
Escherichia coli	0.032398	0.08912	0.060053	0.068031	0.096625	0.039206	0.011794	0.039048	0.17544	0.046291	0.12515	0.05986	0.05545	0.040904	0.074624	0.12832	0.082943	0.075672	0.064282	0.097931
Enterococcus faecalis	0.0090885	0.0067197	0.012444	0.002462	0.01374	0.013931	0.0079772	0.0028673	0.025438	0.011228	0.011229	0.0021652	0.0093792	0.011844	0.014833	0.018318	0.0093735	0.018602	0.019566	0.006588
Helicobacter pylori	0.031825	0.022459	0.027315	0.005303	0.013871	0.029358	0.010371	0.0085521	0.030607	0.028005	0.02541	0.010057	0.0076938	0.0047587	0.027805	0.032373	0.029545	0.016485	0.0062349	0.022379
Lactobacillus gasseri	0.096212	0.017597	0.087182	0.027441	0.062107	0.095606	0.095787	0.033475	0.0095426	0.0087356	0.071892	0.047784	0.044634	0.075401	0.059723	0.020147	0.084736	0.11638	0.10231	0.012388
Listeria monocytogenes	0.015716	0.072576	0.031887	0.089589	0.0082968	0.057574	0.05165	0.058211	0.037478	0.10008	0.025441	0.06955	0.093683	0.011162	0.018943	0.088673	0.039399	0.035689	0.077108	0.10418
Neisseria meningitidis	0.06452	0.0021814	0.052346	0.018065	0.003934	0.007141	0.072684	0.0046181	0.037583	0.055686	0.024595	0.020437	0.03546	0.045565	0.016564	0.046478	0.03883	0.055335	0.029999	0.06741
Propionibacterium acnes	0.047721	0.014233	0.037839	0.043386	0.029029	0.01463	0.010886	0.062967	0.065544	0.026209	0.028836	0.03524	0.025346	0.025832	0.045902	0.0654	0.0010449	0.039443	0.011416	0.047
Pseudomonas aeruginosa	0.032265	0.003164	0.012523	0.0173	0.056816	0.07781	0.021056	0.087869	0.0016392	0.031289	0.018818	0.055433	0.015019	0.054298	0.0019796	0.058164	0.088523	0.042551	0.034144	0.01998
Rhodobacter sphaeroides	0.039899	0.0049922	0.0068733	0.049512	0.05108	0.0097361	0.0087122	0.034239	0.003434	0.024055	0.051699	0.012962	0.023778	0.037377	0.025366	0.053796	0.011278	0.041324	0.028823	0.03416
Streptococcus agalactiae	0.016506	0.098753	0.067167	0.043511	0.016577	0.12312	0.019006	0.079629	0.031472	0.038485	0.027827	0.016015	0.070822	0.11023	0.020288	0.071173	0.016721	0.092061	0.016828	0.0030191
Staphylococcus aureus	0.035046	0.059519	0.092392	0.017458	0.051848	0.057329	0.086728	0.039262	0.086349	0.04563	0.023056	0.028904	0.055052	0.077619	0.084457	0.04844	0.041876	0.017574	0.05875	0.040736
Streptococcus pneumoniae	0.060874	0.02173	0.026214	0.017837	0.034227	0.084863	0.046269	0.083709	0.07787	0.036666	0.013937	0.024846	0.025649	0.02329	0.049203	0.073967	0.017822	0.010104	0.018033	0.023964
Staphylococcus epidermidis	0.065828	0.081396	0.056342	0.054706	0.0010849	0.008325	0.054859	0.042927	0.086167	0.073368	0.023234	0.041325	0.029785	0.060876	0.043189	0.009351	0.055063	0.098566	0.038331	0.015469
Streptococcus mutans	0.079728	0.0029507	0.021546	0.042029	0.030728	0.047141	0.014462	0.012928	0.059984	0.071323	0.044465	0.049479	0.080087	0.017233	0.040654	0.014919	0.038175	0.016882	0.0581	0.017124

## Sheet: KO Abundances
	Sample 1	Sample 2	Sample 3	Sample 4	Sample 5	Sample 6	Sample 7	Sample 8	Sample 9	Sample 10	Sample 11	Sample 12	Sample 13	Sample 14	Sample 15	Sample 16	Sample 17	Sample 18	Sample 19	Sample 20
K00001	0.00052306	0.00062759	0.00068245	0.00052469	0.00055516	0.00054937	0.00047894	0.00054749	0.00051303	0.00064725	0.00061569	0.00046774	0.00062963	0.00079657	0.00057471	0.00041487	0.00065632	0.00041201	0.00070964	0.00050725
K00002	5.098e-05	2.1172e-05	4.2987e-05	5.1211e-05	3.1402e-05	1.9235e-05	1.8114e-05	6.2402e-05	6.1295e-05	3.6182e-05	3.2328e-05	4.1636e-05	3.1193e-05	3.5482e-05	6.1397e-05	6.9006e-05	6.7997e-06	3.7721e-05	1.6586e-05	5.1565e-05
K00003	0.00075261	0.00069231	0.00079511	0.00063789	0.00064729	0.00071812	0.00075064	0.00069054	0.00068656	0.00080146	0.000685	0.00070397	0.0007775	0.00075459	0.00073352	0.00066595	0.00069919	0.00069273	0.00074932	0.00067151
K00004	0.00010314	6.4422e-05	0.00011947	6.4089e-05	7.4061e-05	8.1313e-05	0.00013109	6.0047e-05	7.8088e-05	0.00010424	9.378e-05	9.4493e-05	9.5888e-05	0.00013158	8.5306e-05	7.8429e-05	0.00011116	9.8836e-05	0.00011699	0.00010052
K00005	0.000277	0.0002967	0.00024458	0.00024767	0.00021389	0.00031826	0.00021	0.00021988	0.00036917	0.00032765	0.00021348	0.00023416	0.00034803	0.00024719	0.00029813	0.00025884	0.00017591	0.00026668	0.00025175	0.00018222
K00006	7.0723e-06	4.2343e-06	5.3363e-06	3.8932e-06	4.7399e-06	5.8289e-06	4.9122e-06	2.9435e-06	5.3178e-06	5.456e-06	4.3686e-06	6.2011e-06	5.4876e-06	4.1396e-06	6.7891e-06	4.4341e-06	5.3215e-06	6.1407e-06	5.3312e-06	5.7939e-06
K00007	7.0723e-06	6.6539e-06	4.7434e-06	4.4922e-06	5.3324e-06	4.9546e-06	6.1402e-06	5.887e-06	3.3586e-06	6.8918e-06	4.9511e-06	5.6105e-06	5.1988e-06	5.618e-06	5.9036e-06	4.9884e-06	4.7302e-06	5.5559e-06	5.9235e-06	4.3454e-06
K00008	0.00018417	0.00032816	0.00022827	0.00032494	0.00020322	0.00018186	0.00033157	0.00023047	0.00021551	0.0003242	0.00013222	0.00029411	0.00036738	0.00014873	0.00029075	0.00029515	0.00011619	0.00012925	0.00021739	0.00033836
K00009	0.00025048	0.00024922	0.00019922	0.00019616	0.00027255	0.00022354	0.00025666	0.00017249	0.0003048	0.00026878	0.00018407	0.000238	0.00030586	0.00015346	0.00033148	0.00026023	0.00014072	0.00015761	0.00022539	0.00023784
K00010	0.00025048	0.00015939	0.00016928	0.00025546	0.00027847	0.00012299	0.00014399	0.000229	0.00025134	0.00021307	0.00024057	0.00015621	0.0002195	0.00017505	0.00026271	0.00025773	9.6083e-05	0.0002775	0.00019459	0.00022422
K00011	5.5989e-06	5.1417e-06	5.9292e-06	4.1927e-06	6.5174e-06	6.1204e-06	5.8332e-06	6.1813e-06	5.8776e-06	4.0202e-06	7.5723e-06	7.3822e-06	6.0652e-06	6.2094e-06	5.3132e-06	6.9283e-06	5.6172e-06	6.7255e-06	7.1082e-06	5.7939e-06
K00012	0.00037689	0.00038351	0.00035753	0.00043065	0.00046925	0.00034653	0.00027078	0.00051511	0.00033306	0.00035263	0.00044065	0.00041902	0.00032666	0.00042076	0.00032676	0.00035168	0.00045292	0.0003702	0.00038384	0.00038993
K00013	0.0005425	0.0004933	0.0005025	0.0006337	0.00050095	0.00044795	0.00059253	0.00051305	0.00044782	0.00055766	0.0005388	0.00058881	0.00056262	0.00054731	0.00053014	0.0004872	0.00048455	0.00051319	0.00051061	0.0005817
K00014	0.00049477	0.00055409	0.00051732	0.00056841	0.00042748	0.0005654	0.00054034	0.00051776	0.00052339	0.00055708	0.00049628	0.00056607	0.00059757	0.00046984	0.00047199	0.00052905	0.00049283	0.00052254	0.00053726	0.00056925
K00015	3.8308e-06	6.9564e-06	7.115e-06	4.1927e-06	5.0362e-06	2.3316e-06	4.9122e-06	3.8265e-06	6.7173e-06	4.0202e-06	7.2811e-06	5.9058e-06	7.5093e-06	5.0266e-06	5.3132e-06	4.7113e-06	5.9128e-06	3.8014e-06	5.3312e-06	4.9248e-06
K00016	0.00061028	0.00077216	0.00074411	0.00073163	0.00057383	0.00063185	0.00063122	0.00065286	0.00068964	0.00072852	0.00059676	0.00064786	0.00084335	0.00057718	0.00072997	0.00061801	0.00049993	0.00059009	0.0007046	0.00067151
K00018	0.00013437	9.6784e-05	0.00011117	0.00010931	0.00012205	0.00010667	0.00016886	0.00012569	6.3254e-05	0.00010682	8.3878e-05	0.00012609	0.0001008	0.00012419	9.0029e-05	9.6165e-05	0.00013215	0.00011492	0.00010425	0.00012486
K00019	8.5162e-05	7.2588e-05	7.6487e-05	8.3854e-05	0.00013124	0.00010201	6.8157e-05	0.00011185	3.8064e-05	8.8157e-05	0.00010164	0.00010394	7.6248e-05	0.00013394	8.2945e-05	0.00010088	0.00012506	8.9771e-05	0.00010662	9.1543e-05
K00020	0.00026698	0.00010132	0.00016631	0.00028001	0.00033031	0.00032117	0.00025605	0.00035822	7.7808e-05	0.00024265	0.00026823	0.00031448	0.00023394	0.00033264	0.00015497	0.00033893	0.00032875	0.00029797	0.00027159	0.00030505
K00021	7.367e-06	6.3515e-06	4.7434e-06	4.1927e-06	5.9249e-06	4.9546e-06	6.1402e-06	6.4757e-06	4.7581e-06	4.0202e-06	3.7862e-06	3.5435e-06	4.3323e-06	5.3223e-06	3.8373e-06	4.4341e-06	5.6172e-06	5.5559e-06	4.4426e-06	4.9248e-06
K00022	3.8308e-06	7.5613e-06	7.115e-06	8.086e-06	5.0362e-06	4.0802e-06	6.1402e-06	2.9435e-06	5.3178e-06	6.8918e-06	5.5336e-06	5.0199e-06	7.5093e-06	5.618e-06	7.3794e-06	5.2655e-06	4.139e-06	4.6786e-06	4.7388e-06	4.0557e-06
K00023	6.1883e-05	5.8071e-05	5.188e-05	9.4935e-05	9.8057e-05	3.4682e-05	2.1184e-05	7.5647e-05	2.491e-05	6.8631e-05	0.00010747	4.4884e-05	7.9425e-05	9.8167e-05	7.3794e-05	6.9838e-05	5.6467e-05	6.1992e-05	8.6483e-05	7.9955e-05
K00024	0.00030264	0.00035538	0.00031484	0.00035608	0.00027166	0.00022179	0.00029074	0.00029817	0.00033027	0.00023059	0.00033464	0.00026989	0.00021315	0.00030101	0.00028721	0.00020785	0.00029002	0.00035207	0.00027663	0.00027608
K00025	4.7149e-06	5.7466e-06	5.0398e-06	5.6901e-06	5.9249e-06	3.7888e-06	6.4472e-06	6.1813e-06	4.7581e-06	4.3074e-06	3.7862e-06	6.4964e-06	5.4876e-06	5.3223e-06	6.4939e-06	3.8799e-06	4.7302e-06	3.8014e-06	4.4426e-06	5.2145e-06
K00026	5.8936e-06	5.4441e-06	6.2257e-06	3.2943e-06	3.5549e-06	5.8289e-06	5.2192e-06	5.0039e-06	4.1983e-06	3.4459e-06	4.3686e-06	5.0199e-06	5.1988e-06	6.5051e-06	5.6084e-06	3.8799e-06	5.3215e-06	6.4331e-06	4.4426e-06	5.5042e-06
K00027	0.0007479	0.00091371	0.0009546	0.0009194	0.00077172	0.00079069	0.00083354	0.00078032	0.00092978	0.00090742	0.0008848	0.0009529	0.00098574	0.00080012	0.0009	0.00078318	0.0007932	0.00078484	0.0008749	0.00097714
K00028	7.0723e-06	6.6539e-06	5.9292e-06	4.1927e-06	7.4061e-06	5.8289e-06	7.6753e-06	3.2378e-06	5.5977e-06	6.8918e-06	5.8249e-06	5.0199e-06	5.1988e-06	6.8007e-06	6.1987e-06	4.7113e-06	4.4346e-06	5.2635e-06	8.5891e-06	4.3454e-06
K00029	0.00041078	0.00025678	0.00025199	0.00041238	0.00050391	0.00032088	0.00032666	0.00039796	0.00029444	0.00025126	0.00043745	0.00029824	0.00022817	0.00042992	0.0003492	0.00043676	0.00037694	0.00046494	0.00038147	0.00032591
K00030	5.0096e-06	6.6539e-06	2.9646e-06	5.3906e-06	6.2211e-06	4.3717e-06	7.6753e-06	3.2378e-06	3.0787e-06	4.0202e-06	9.0285e-06	5.6105e-06	4.9099e-06	4.1396e-06	5.9036e-06	5.8198e-06	5.3215e-06	4.0938e-06	5.6273e-06	5.5042e-06
K00031	0.00079858	0.00058071	0.00070795	0.0007472	0.00073765	0.00070034	0.00083262	0.00076236	0.00066501	0.00074718	0.00069898	0.00082504	0.00068104	0.00076227	0.00072761	0.00080341	0.00074472	0.00076934	0.0007277	0.0007787
K00032	2.7111e-05	6.3515e-06	1.4823e-05	1.5273e-05	4.0289e-05	5.5666e-05	2.6403e-05	5.7987e-05	2.519e-06	2.8141e-05	2.1843e-05	3.9864e-05	1.4152e-05	3.7848e-05	7.3794e-06	4.1293e-05	6.7406e-05	2.6317e-05	2.9618e-05	2.0568e-05
K00033	0.0005873	0.00068021	0.00076635	0.00055314	0.00048288	0.00052897	0.00065608	0.00052158	0.00076941	0.00062342	0.00056851	0.00049254	0.00058053	0.00053667	0.00062725	0.00051214	0.00055521	0.00061933	0.00062789	0.00059532
K00034	3.8898e-05	9.618e-05	6.2257e-05	5.78e-05	3.4068e-05	2.0401e-05	3.1622e-05	3.9443e-05	5.5977e-05	7.2076e-05	5.155e-05	4.2817e-05	5.5165e-05	6.919e-05	4.7524e-05	1.2194e-05	7.3614e-05	4.0646e-05	7.1971e-05	4.3744e-05
K00035	7.367e-06	8.4686e-06	6.2257e-06	6.2891e-06	4.7399e-06	4.6631e-06	6.7543e-06	4.4152e-06	5.3178e-06	6.0303e-06	4.0774e-06	5.0199e-06	5.1988e-06	4.7309e-06	5.9036e-06	3.6027e-06	4.4346e-06	6.4331e-06	3.8503e-06	6.0836e-06
K00036	0.00075939	0.00071742	0.00080874	0.00068761	0.00065263	0.00073881	0.00071227	0.00069849	0.00076941	0.00069406	0.00070335	0.00063842	0.00063078	0.0007191	0.0006857	0.00069117	0.00076098	0.00073718	0.00071911	0.00070193
K00037	4.4202e-06	5.4441e-06	5.3363e-06	3.8932e-06	5.0362e-06	3.7888e-06	7.0613e-06	3.8265e-06	4.1983e-06	8.6147e-06	4.0774e-06	7.6775e-06	5.7764e-06	5.618e-06	3.8373e-06	4.9884e-06	3.5477e-06	6.4331e-06	3.2579e-06	4.6351e-06
K00038	6.1883e-06	4.5368e-06	4.1504e-06	5.9896e-06	4.1474e-06	6.4118e-06	5.2192e-06	3.8265e-06	5.8776e-06	4.0202e-06	4.3686e-06	5.9058e-06	5.4876e-06	5.9137e-06	5.6084e-06	6.9283e-06	2.9564e-06	7.3104e-06	7.7006e-06	6.0836e-06
K00039	3.3593e-05	7.2588e-06	1.0376e-05	4.3125e-05	4.1178e-05	8.1605e-06	1.443e-05	2.6491e-05	4.1983e-06	1.924e-05	3.99e-05	1.565e-05	2.4261e-05	3.1047e-05	2.7452e-05	4.545e-05	1.4486e-05	2.8072e-05	2.1028e-05	3.3894e-05
K00040	0.0001105	0.00014215	6.9965e-05	0.00018628	0.00019167	5.4209e-05	0.00012004	0.00011038	0.00011867	0.00013267	0.0001829	0.00014085	0.00015192	8.5748e-05	0.00016648	0.00017847	7.6866e-05	0.00012281	0.00010188	0.00018338
K00041	0.00016561	0.00024952	0.00015623	0.00025665	0.00024085	0.00010084	0.00022013	0.000156	0.0001573	0.00015305	0.00017096	0.00020523	0.00018225	0.00010319	0.00022611	0.00015713	0.00013215	0.0001427	0.00013387	0.00022422
K00042	0.0001161	0.00019145	0.00016038	0.00017609	0.00023551	0.00015534	0.00012956	0.00016631	0.00016989	0.0001789	0.00021115	0.00022737	0.00019322	0.00018865	0.0001777	0.00019205	0.00024095	0.00012691	0.00020614	0.00018888
K00043	5.8936e-06	4.8392e-06	5.3363e-06	6.888e-06	7.1099e-06	4.3717e-06	4.6052e-06	2.9435e-06	5.3178e-06	5.456e-06	4.0774e-06	9.154e-06	5.7764e-06	7.0964e-06	4.4277e-06	4.157e-06	5.6172e-06	4.3862e-06	3.2579e-06	4.3454e-06
K00044	3.8308e-06	6.049e-06	5.9292e-06	5.9896e-06	5.3324e-06	5.5375e-06	5.8332e-06	4.7096e-06	3.9184e-06	4.8817e-06	4.9511e-06	5.0199e-06	4.3323e-06	5.618e-06	5.9036e-06	4.157e-06	5.6172e-06	5.5559e-06	3.5541e-06	5.2145e-06
K00045	9.2824e-05	1.7845e-05	3.0239e-05	9.4935e-05	0.00012946	9.6468e-05	4.3903e-05	0.00013393	1.1755e-05	8.0404e-05	8.5334e-05	8.0319e-05	6.123e-05	0.00011384	4.0144e-05	0.00011778	0.00010968	0.00010147	8.056e-05	6.663e-05
K00046	0.00018712	0.00018329	0.0001675	0.00020814	0.00022722	0.00018478	0.00016517	0.00019751	0.00019536	0.00015277	0.00019455	0.00012343	0.00016029	0.00018125	0.00020161	0.00022143	0.00012979	0.00017925	0.00018244	0.00015383
K00048	0.00010608	0.00017966	0.00011325	0.00013686	0.00012265	6.6741e-05	0.00015719	8.595e-05	0.00011335	8.2701e-05	0.00011388	9.9217e-05	9.6466e-05	7.5104e-05	0.00012516	9.6997e-05	0.00011146	9.9421e-05	0.00010396	0.00011964
K00049	5.8936e-06	6.3515e-06	6.2257e-06	3.5938e-06	7.1099e-06	5.8289e-06	7.0613e-06	5.887e-06	5.3178e-06	4.3074e-06	5.2424e-06	5.0199e-06	6.354e-06	5.0266e-06	4.4277e-06	5.8198e-06	2.0695e-06	6.7255e-06	6.812e-06	4.3454e-06
K00050	8.9288e-05	5.2324e-05	5.8699e-05	0.00014225	0.00012709	0.00011017	0.00010009	0.0001248	1.6513e-05	8.2701e-05	0.00012815	0.00012461	9.7332e-05	0.00010674	7.0843e-05	0.00010919	0.00011796	0.00010468	9.9219e-05	0.00012804
K00051	5.5989e-06	5.7466e-06	5.3363e-06	5.6901e-06	5.0362e-06	6.1204e-06	5.2192e-06	5.0039e-06	5.3178e-06	8.3276e-06	5.8249e-06	7.0869e-06	6.9317e-06	4.7309e-06	6.1987e-06	3.8799e-06	5.3215e-06	5.8483e-06	5.3312e-06	4.9248e-06
K00052	0.0004376	0.00047485	0.00042868	0.00052289	0.00038749	0.00038558	0.00053973	0.0003803	0.000398	0.0004629	0.00048579	0.00049402	0.00046847	0.00040657	0.00041236	0.00033062	0.00044346	0.00042459	0.00046618	0.00048582
K00053	0.00054663	0.00058403	0.00054845	0.00054116	0.00047192	0.00047476	0.00052284	0.0005054	0.00057573	0.00059643	0.00053035	0.00051705	0.00054183	0.00049409	0.00055907	0.00049662	0.00049845	0.00045236	0.00051268	0.00056867
K00054	0.00031884	0.0003209	0.00035042	0.00023359	0.00022811	0.00038529	0.00037026	0.00023077	0.00042934	0.00034344	0.00022222	0.00021645	0.00037402	0.00032939	0.00034123	0.00029016	0.00025425	0.00033335	0.0003871	0.00018743
K00055	6.1883e-06	4.2343e-06	5.0398e-06	3.5938e-06	4.1474e-06	7.2861e-06	7.9823e-06	7.0644e-06	3.3586e-06	6.0303e-06	6.9898e-06	5.9058e-06	5.7764e-06	5.3223e-06	4.1325e-06	4.9884e-06	7.6866e-06	4.971e-06	6.812e-06	6.0836e-06
K00057	0.00062531	0.00060067	0.00058847	0.0005756	0.00055664	0.00057007	0.00066222	0.0005678	0.00061743	0.00059786	0.00056676	0.00056135	0.00060479	0.00053075	0.00062253	0.0005393	0.0005224	0.00056056	0.00054941	0.00057794
K00058	0.00068719	0.00067719	0.00064688	0.00077955	0.00059812	0.00055462	0.00057718	0.00066788	0.00065045	0.00066017	0.00068966	0.00062158	0.0006432	0.00059462	0.00067035	0.00064156	0.00053245	0.00068045	0.00057132	0.00065094
K00059	0.0011937	0.0010604	0.0011568	0.0011976	0.0012976	0.001294	0.0011759	0.0013534	0.00093874	0.0012408	0.0011725	0.0012511	0.0012104	0.0014143	0.0011435	0.0012429	0.0013254	0.0012357	0.0013236	0.0011623
K00060	0.00011463	0.00011947	0.00011325	0.00018927	0.00013805	8.5394e-05	8.4428e-05	0.00011009	0.00015981	8.2988e-05	0.0001896	0.00013908	0.0001265	9.4619e-05	0.00014375	0.00015797	7.6866e-05	0.00013217	0.00010544	0.00017845
K00061	4.7149e-06	3.327e-06	3.5575e-06	5.0912e-06	5.6286e-06	5.5375e-06	7.9823e-06	7.3587e-06	7.5569e-06	5.456e-06	4.0774e-06	5.9058e-06	5.1988e-06	5.0266e-06	5.6084e-06	5.5427e-06	5.6172e-06	4.3862e-06	5.035e-06	4.0557e-06
K00062	5.5989e-06	6.6539e-06	5.6327e-06	6.5886e-06	5.9249e-06	6.4118e-06	4.9122e-06	4.4152e-06	5.3178e-06	4.3074e-06	3.4949e-06	6.7917e-06	6.0652e-06	5.3223e-06	6.7891e-06	6.0969e-06	4.7302e-06	5.2635e-06	6.2197e-06	5.5042e-06
K00063	6.4829e-06	5.1417e-06	5.6327e-06	6.5886e-06	4.7399e-06	5.5375e-06	3.0701e-06	3.8265e-06	4.7581e-06	4.8817e-06	8.4461e-06	7.9728e-06	3.7547e-06	3.5482e-06	7.9698e-06	4.4341e-06	4.4346e-06	4.3862e-06	5.6273e-06	5.2145e-06
K00064	4.6265e-05	1.0888e-05	1.3934e-05	5.5703e-05	4.7992e-05	1.3698e-05	1.3202e-05	3.6205e-05	8.6765e-06	2.9003e-05	4.9511e-05	1.9194e-05	3.4947e-05	4.3466e-05	3.0108e-05	5.1824e-05	1.3304e-05	4.4739e-05	3.7614e-05	3.766e-05
K00065	9.0172e-05	0.00010525	5.2473e-05	0.00014555	0.00014605	4.1677e-05	0.00010346	8.0357e-05	7.389e-05	9.8782e-05	0.00010747	0.000119	0.00012333	5.3223e-05	0.00012988	0.00010974	4.1685e-05	7.5735e-05	6.2493e-05	0.00013645
K00066	3.4477e-05	8.7711e-06	1.6305e-05	2.306e-05	5.362e-05	8.0439e-05	2.6096e-05	7.5647e-05	3.9184e-06	3.9053e-05	2.2134e-05	5.1971e-05	2.3106e-05	5.5884e-05	7.3794e-06	5.2655e-05	8.1005e-05	5.0588e-05	3.6726e-05	2.0568e-05
K00067	0.00038544	0.00039198	0.0003771	0.00042107	0.00039638	0.00038179	0.0004114	0.00033762	0.00028212	0.00036239	0.00037832	0.00038033	0.00044218	0.00040065	0.00035156	0.00033755	0.00042395	0.00039271	0.00042768	0.00038471
K00068	0.00013231	0.00013187	9.4274e-05	0.00013387	0.00013094	8.7725e-05	8.8726e-05	0.00010214	0.00018584	0.00015104	0.00013718	0.00011428	0.00014037	6.3572e-05	0.00012191	9.9768e-05	8.337e-05	0.00012632	0.00010899	0.00010806
K00069	5.8936e-06	5.1417e-06	4.1504e-06	5.0912e-06	6.5174e-06	7.869e-06	3.9912e-06	4.1209e-06	4.4782e-06	4.3074e-06	3.2037e-06	5.9058e-06	6.0652e-06	8.2792e-06	5.9036e-06	5.5427e-06	7.6866e-06	4.6786e-06	4.1465e-06	4.9248e-06
K00070	4.7149e-06	4.5368e-06	6.8186e-06	2.0964e-06	5.9249e-06	4.6631e-06	5.2192e-06	5.2983e-06	4.7581e-06	6.8918e-06	4.9511e-06	3.8388e-06	5.1988e-06	6.2094e-06	5.018e-06	5.8198e-06	3.252e-06	4.0938e-06	4.4426e-06	3.1866e-06
K00071	7.6617e-06	5.1417e-06	5.0398e-06	3.8932e-06	6.5174e-06	2.9145e-06	5.5262e-06	4.4152e-06	3.9184e-06	2.8716e-06	5.8249e-06	5.9058e-06	5.7764e-06	5.3223e-06	8.8553e-06	5.5427e-06	5.3215e-06	2.9241e-06	4.4426e-06	4.0557e-06
K00072	4.4202e-06	4.2343e-06	4.4469e-06	4.4922e-06	7.4061e-06	5.8289e-06	8.9033e-06	6.77e-06	6.7173e-06	5.456e-06	6.6986e-06	6.4964e-06	4.3323e-06	5.618e-06	3.5421e-06	5.5427e-06	1.1826e-06	5.2635e-06	6.2197e-06	5.2145e-06
K00073	4.8033e-05	7.5915e-05	6.7889e-05	5.0912e-05	8.0875e-05	6.2952e-05	3.8376e-05	2.7963e-05	0.00014218	6.1739e-05	9.3489e-05	3.9273e-05	6.354e-05	6.3276e-05	8.4126e-05	9.284e-05	7.1545e-05	8.9771e-05	9.8034e-05	6.1705e-05
K00074	0.00027052	0.00033814	0.00025881	0.00037495	0.00043429	0.00046456	0.00035398	0.00042533	0.000206	0.00031013	0.00038153	0.00051528	0.00038153	0.00039356	0.00032794	0.00036997	0.00043163	0.00035499	0.00033468	0.00039485
K00075	0.00058405	0.00055772	0.00062227	0.00054625	0.0005205	0.00054005	0.00054003	0.00054131	0.00062443	0.00055335	0.00055686	0.00051587	0.00055136	0.00054583	0.0005815	0.0005066	0.00054486	0.00056787	0.00055059	0.00051826
K00076	0.0001438	7.4706e-05	9.7239e-05	8.5951e-05	0.00015731	0.0001262	0.00013386	0.00010803	0.00013686	8.8157e-05	0.00014271	0.00013436	8.1158e-05	0.00013513	0.00015733	0.00016462	0.00011441	0.00015059	0.00011373	0.00011704
K00077	0.00048092	0.00064331	0.0005692	0.00059417	0.00059219	0.00044387	0.00055139	0.00051305	0.00053738	0.00060791	0.00047007	0.00052296	0.00061692	0.00054258	0.00060836	0.00053016	0.00046948	0.00050295	0.00058228	0.00053999
K00078	5.0096e-06	5.1417e-06	4.7434e-06	4.1927e-06	4.7399e-06	6.4118e-06	6.1402e-06	5.2983e-06	5.3178e-06	5.1688e-06	4.0774e-06	6.4964e-06	5.1988e-06	5.3223e-06	6.1987e-06	5.8198e-06	6.2084e-06	3.509e-06	4.1465e-06	5.7939e-06
K00079	7.6617e-06	3.0245e-06	4.1504e-06	3.8932e-06	5.0362e-06	3.4973e-06	5.8332e-06	5.2983e-06	5.8776e-06	6.3175e-06	3.4949e-06	5.9058e-06	3.177e-06	5.3223e-06	4.1325e-06	4.9884e-06	4.7302e-06	5.5559e-06	4.7388e-06	4.9248e-06
K00081	5.8936e-06	3.0245e-06	6.5221e-06	5.9896e-06	4.4437e-06	4.3717e-06	5.5262e-06	4.7096e-06	2.7989e-06	4.0202e-06	4.3686e-06	5.9058e-06	3.4658e-06	5.0266e-06	5.018e-06	4.157e-06	6.2084e-06	5.5559e-06	5.035e-06	6.3733e-06
K00082	5.0096e-06	4.2343e-06	5.0398e-06	5.6901e-06	5.3324e-06	4.9546e-06	7.9823e-06	4.1209e-06	7.277e-06	4.3074e-06	5.5336e-06	6.2011e-06	4.3323e-06	4.4353e-06	5.018e-06	2.7713e-06	3.252e-06	5.8483e-06	5.6273e-06	5.2145e-06
K00083	6.1883e-06	4.5368e-06	5.0398e-06	5.9896e-06	5.3324e-06	7.2861e-06	8.5963e-06	4.4152e-06	5.3178e-06	3.733e-06	4.0774e-06	5.9058e-06	4.3323e-06	6.5051e-06	6.7891e-06	5.8198e-06	5.0259e-06	3.8014e-06	6.812e-06	3.4763e-06
K00084	8.8404e-06	8.4686e-06	6.8186e-06	5.3906e-06	5.3324e-06	5.8289e-06	8.5963e-06	6.77e-06	4.4782e-06	4.8817e-06	4.6599e-06	6.2011e-06	4.6211e-06	5.9137e-06	5.6084e-06	4.7113e-06	4.4346e-06	4.0938e-06	8.5891e-06	6.663e-06
K00085	5.8936e-06	5.1417e-06	4.4469e-06	6.2891e-06	2.9624e-06	6.1204e-06	4.9122e-06	4.1209e-06	4.7581e-06	5.1688e-06	4.6599e-06	4.4293e-06	5.1988e-06	4.7309e-06	7.9698e-06	7.4826e-06	3.8433e-06	6.7255e-06	5.9235e-06	7.8217e-06
K00086	5.3042e-06	2.4196e-06	6.2257e-06	5.6901e-06	3.8512e-06	4.9546e-06	6.4472e-06	4.4152e-06	5.0379e-06	5.456e-06	5.5336e-06	6.2011e-06	6.0652e-06	5.0266e-06	6.7891e-06	6.0969e-06	4.4346e-06	7.0179e-06	7.9967e-06	6.3733e-06
K00087	3.8603e-05	0.00010888	6.4332e-05	7.7865e-05	9.0355e-05	3.9637e-05	1.9342e-05	4.062e-05	0.00015366	4.7955e-05	0.00011155	5.8763e-05	6.4984e-05	4.8492e-05	7.8812e-05	0.00011196	7.5979e-05	6.2577e-05	6.664e-05	9.2123e-05
K00088	0.0010977	0.0010105	0.0010539	0.0010814	0.00088103	0.00092417	0.001023	0.0010806	0.0011425	0.001061	0.00091858	0.00098568	0.0010242	0.00088942	0.0010393	0.0010207	0.00078936	0.00099216	0.000906	0.0010632
K00089	7.0723e-06	3.9319e-06	8.5973e-06	5.3906e-06	5.3324e-06	4.9546e-06	3.3771e-06	2.9435e-06	4.4782e-06	5.7431e-06	3.2037e-06	5.6105e-06	4.0435e-06	5.0266e-06	5.3132e-06	4.4341e-06	5.0259e-06	7.3104e-06	4.1465e-06	5.2145e-06
K00090	0.0001217	0.00010465	0.00010673	0.00013716	0.00018782	0.00014077	9.5788e-05	0.00014982	0.00011391	0.00012979	0.00016717	0.00016566	0.00013257	0.00019072	0.00012102	0.00017515	0.00017206	0.00014358	0.00017386	0.00013818
K00091	3.8014e-05	5.4441e-06	2.5792e-05	1.4076e-05	4.3844e-05	4.1968e-05	5.0964e-05	3.7971e-05	2.491e-05	1.6942e-05	2.1261e-05	4.9018e-05	1.4441e-05	4.0213e-05	3.8373e-05	3.2702e-05	2.3947e-05	4.3277e-05	3.2283e-05	1.9989e-05
K00092	4.4202e-06	5.1417e-06	5.6327e-06	5.6901e-06	5.3324e-06	5.246e-06	3.9912e-06	5.0039e-06	3.6385e-06	5.456e-06	9.611e-06	4.7246e-06	4.9099e-06	5.0266e-06	5.6084e-06	4.9884e-06	5.6172e-06	6.1407e-06	4.1465e-06	3.766e-06
K00094	2.0628e-05	4.9905e-05	3.5872e-05	3.6537e-05	5.125e-05	2.5939e-05	1.4737e-05	2.1193e-05	7.8648e-05	3.0151e-05	5.0676e-05	3.4844e-05	3.5236e-05	2.3359e-05	4.3686e-05	5.1824e-05	3.8433e-05	3.5675e-05	3.3764e-05	4.2006e-05
K00095	3.8308e-06	6.6539e-06	3.854e-06	7.7865e-06	5.3324e-06	4.6631e-06	6.1402e-06	5.887e-06	3.0787e-06	4.5945e-06	4.0774e-06	5.9058e-06	4.0435e-06	6.2094e-06	4.1325e-06	5.8198e-06	5.9128e-06	4.3862e-06	3.2579e-06	3.1866e-06
K00096	0.00011522	0.00015969	4.9805e-05	0.00017699	0.00016679	3.9928e-05	0.00020079	9.7429e-05	2.8548e-05	0.00014099	7.8053e-05	0.00021143	0.00019409	2.4246e-05	0.00019098	0.0001139	2.099e-05	5.4097e-05	4.6203e-05	0.0001631
K00097	0.0003489	0.00016605	0.0002345	0.00025905	0.00034572	0.00027396	0.00026096	0.00034556	0.00025022	0.00025155	0.00028338	0.00025543	0.0001782	0.0003152	0.00025149	0.00036692	0.00031308	0.00033189	0.00026597	0.00027984
K00098	2.1806e-05	4.5065e-05	3.4982e-05	3.3242e-05	4.4437e-05	1.8361e-05	1.3202e-05	1.6189e-05	7.333e-05	2.6706e-05	5.5627e-05	2.5985e-05	3.6969e-05	1.9811e-05	3.6602e-05	5.5981e-05	3.3112e-05	3.392e-05	2.6063e-05	4.8958e-05
K00099	0.00044408	0.00041708	0.00041386	0.00048096	0.00042541	0.00036868	0.00041477	0.00043122	0.00041479	0.0004003	0.00046861	0.00047542	0.00038009	0.00036428	0.00038373	0.0004351	0.00040473	0.00044213	0.00039184	0.00051884
K00100	0.00050272	0.00022623	0.00026296	0.00058159	0.00064107	0.00034624	0.00033065	0.00047979	0.00011867	0.0003555	0.00056239	0.00035789	0.00037893	0.00054731	0.0003793	0.00051713	0.00038788	0.00051319	0.00047625	0.00040963
K00101	0.00021482	6.412e-05	0.00013874	0.00016112	0.000237	0.0002043	0.00020324	0.00024931	0.00014302	0.00018206	0.00019426	0.00020877	0.00013257	0.0002327	0.00012457	0.00026466	0.00025691	0.00024124	0.00018955	0.00019612
K00102	0.00012259	0.00014911	0.00011592	0.00024707	0.00019286	0.00010405	0.00010623	0.00013363	4.4222e-05	0.00013181	0.00024668	0.00013938	0.00017502	0.00018037	0.00016028	0.00013164	0.00013126	0.00012135	0.00018037	0.00019265
K00103	4.4202e-06	3.6294e-06	4.7434e-06	7.487e-06	5.3324e-06	4.0802e-06	4.6052e-06	6.1813e-06	4.1983e-06	6.0303e-06	6.9898e-06	6.4964e-06	6.0652e-06	6.8007e-06	5.9036e-06	4.7113e-06	3.5477e-06	5.5559e-06	3.8503e-06	5.2145e-06
K00104	0.00031825	0.00043009	0.0003181	0.00044323	0.00040763	0.00033341	0.00038591	0.00028905	0.00025973	0.00035177	0.00047356	0.00045888	0.00041099	0.00025636	0.0004165	0.00036415	0.00038788	0.00028715	0.00029084	0.00049103
K00105	9.5181e-05	0.00011947	9.3088e-05	5.9896e-05	5.3917e-05	0.00020022	8.4121e-05	0.00015483	0.00011083	8.4711e-05	3.8153e-05	4.9018e-05	0.00010253	0.00011709	8.6192e-05	0.0001272	4.3755e-05	8.0414e-05	3.5837e-05	4.1426e-05
K00106	7.0723e-06	5.4441e-06	5.0398e-06	5.3906e-06	2.9624e-06	4.0802e-06	6.7543e-06	3.5322e-06	5.3178e-06	6.0303e-06	4.3686e-06	6.2011e-06	4.0435e-06	6.2094e-06	4.4277e-06	5.2655e-06	4.7302e-06	6.7255e-06	6.5159e-06	5.5042e-06
K00107	3.5362e-06	4.2343e-06	4.7434e-06	2.9948e-06	5.0362e-06	3.4973e-06	7.3683e-06	6.4757e-06	4.4782e-06	3.733e-06	3.4949e-06	5.9058e-06	3.7547e-06	4.4353e-06	5.018e-06	6.0969e-06	7.6866e-06	6.1407e-06	3.8503e-06	4.0557e-06
K00108	0.00027788	0.00026737	0.00027749	0.00023689	0.00033979	0.00031039	0.00030179	0.00036676	0.00030424	0.00028831	0.00025076	0.00031773	0.00023279	0.00037286	0.00026655	0.00035612	0.00039852	0.00033803	0.00030625	0.00024711
K00109	5.3042e-06	4.8392e-06	5.9292e-06	6.5886e-06	6.8136e-06	6.4118e-06	5.5262e-06	5.0039e-06	5.0379e-06	5.1688e-06	5.2424e-06	5.0199e-06	5.7764e-06	5.3223e-06	4.4277e-06	3.8799e-06	2.6608e-06	6.7255e-06	6.5159e-06	6.0836e-06
K00111	0.00052777	0.00067477	0.00059529	0.00069839	0.00061441	0.00056278	0.0005603	0.00070231	0.00065213	0.00061566	0.00064918	0.0007022	0.00061605	0.00057895	0.00060423	0.00063824	0.00061316	0.00061056	0.00056688	0.00066137
K00112	0.00012141	0.00012461	0.00011384	0.00014016	0.00010517	5.2169e-05	3.5306e-05	0.00015159	0.00021691	9.5336e-05	0.00013921	0.0001004	8.5202e-05	5.5293e-05	0.00011423	0.0001261	6.5928e-05	0.00014796	5.1535e-05	0.00013094
K00113	0.00012406	0.00011614	0.00010554	0.00014375	0.00010961	4.9837e-05	4.114e-05	0.00015895	0.00022559	8.7296e-05	0.00013455	0.00010837	8.1736e-05	6.5051e-05	0.00010981	0.00011612	5.2033e-05	0.00013948	5.9235e-05	0.00012573
K00114	4.2729e-05	6.3515e-06	2.6088e-05	2.875e-05	7.5542e-05	0.00010987	3.8376e-05	0.00011038	5.8776e-06	5.255e-05	2.6503e-05	7.648e-05	2.8593e-05	7.5991e-05	1.0036e-05	7.5657e-05	0.0001153	5.9068e-05	5.0646e-05	2.839e-05
K00115	4.1255e-06	5.4441e-06	7.708e-06	5.6901e-06	5.9249e-06	4.6631e-06	3.9912e-06	8.8304e-06	5.0379e-06	3.733e-06	3.4949e-06	6.2011e-06	4.0435e-06	6.2094e-06	5.018e-06	4.9884e-06	2.6608e-06	6.4331e-06	5.035e-06	3.1866e-06
K00116	0.00057905	0.00065995	0.0006949	0.00042107	0.00043844	0.00047826	0.0006656	0.00051776	0.00069832	0.0006596	0.00041823	0.0005578	0.000452	0.00071437	0.00057205	0.0004606	0.00072343	0.00066934	0.0005497	0.00044294
K00117	0.00027995	0.00012763	0.00016454	0.00025037	0.00041208	0.00031651	0.0002275	0.00033909	0.00024098	0.00019125	0.00030872	0.00032895	0.00018484	0.00033442	0.00025592	0.00039491	0.00029889	0.00035324	0.00027663	0.00026159
K00118	6.7776e-06	4.8392e-06	5.0398e-06	5.9896e-06	4.4437e-06	6.4118e-06	6.1402e-06	4.1209e-06	5.0379e-06	4.5945e-06	4.6599e-06	7.9728e-06	4.0435e-06	4.4353e-06	6.4939e-06	5.8198e-06	5.0259e-06	4.0938e-06	5.6273e-06	6.0836e-06
K00119	7.6027e-05	7.894e-05	6.4332e-05	0.00014794	0.0001022	6.8781e-05	0.00011452	6.7111e-05	2.6029e-05	5.7719e-05	0.00016397	0.00011812	0.00010195	8.5453e-05	0.00010626	9.1454e-05	5.8832e-05	9.5035e-05	9.2407e-05	0.00013065
K00120	4.7149e-06	4.5368e-06	6.5221e-06	5.3906e-06	8.8873e-06	2.3316e-06	6.1402e-06	4.1209e-06	5.3178e-06	5.456e-06	5.8249e-06	3.5435e-06	4.0435e-06	5.9137e-06	5.3132e-06	6.0969e-06	5.9128e-06	3.2166e-06	5.3312e-06	5.5042e-06
K00121	0.00019596	0.00012552	0.00018114	0.00017759	0.00020115	0.00015447	0.00012096	0.00014394	0.00015786	0.00021738	0.0002295	0.00016507	0.00020795	0.00020875	0.00015231	0.00019178	0.00026016	0.00015439	0.00022539	0.00021003
K00122	2.77e-05	4.446e-05	6.4332e-05	1.6172e-05	3.1698e-05	4.1968e-05	7.1227e-05	2.8846e-05	5.4858e-05	3.1874e-05	1.8348e-05	2.4214e-05	4.7078e-05	5.1153e-05	5.874e-05	3.2147e-05	3.2225e-05	1.3743e-05	3.8799e-05	2.868e-05
K00123	0.00073493	0.0010032	0.00092229	0.00098559	0.0012534	0.00091776	0.00074635	0.00094074	0.0010367	0.0010728	0.0011533	0.0010022	0.0011252	0.001136	0.0010426	0.0011895	0.0011276	0.00087315	0.0012368	0.0011145
K00124	8.8699e-05	5.2324e-05	4.773e-05	0.00012249	0.00014042	8.2479e-05	4.0219e-05	0.00011362	6.9692e-05	7.2938e-05	0.00013077	7.6775e-05	7.7404e-05	9.7871e-05	7.5566e-05	0.00013912	0.00010968	0.00011872	9.833e-05	0.00010371
K00125	3.5362e-06	3.6294e-06	4.4469e-06	3.5938e-06	5.9249e-06	6.1204e-06	3.6841e-06	4.4152e-06	5.5977e-06	5.1688e-06	5.5336e-06	5.6105e-06	5.1988e-06	5.3223e-06	8.5602e-06	4.4341e-06	3.8433e-06	5.5559e-06	5.6273e-06	4.6351e-06
K00126	1.4145e-05	5.7466e-06	5.3363e-06	1.2878e-05	1.5701e-05	7.5776e-06	8.9033e-06	1.0008e-05	4.7581e-06	1.1773e-05	1.2232e-05	7.6775e-06	1.3863e-05	1.3897e-05	1.2397e-05	1.2748e-05	7.9823e-06	9.9421e-06	1.0366e-05	1.2457e-05
K00127	3.9487e-05	3.5992e-05	3.2314e-05	5.9297e-05	8.443e-05	5.7998e-05	2.3333e-05	6.564e-05	5.01e-05	4.7381e-05	7.1355e-05	5.1676e-05	4.5922e-05	5.1745e-05	4.3391e-05	7.0946e-05	7.9527e-05	5.5266e-05	5.3015e-05	5.5911e-05
K00128	0.00088139	0.00086259	0.00088879	0.0010206	0.0010419	0.00088104	0.00097384	0.0010305	0.00059224	0.00093728	0.00097829	0.0010152	0.00092538	0.0012507	0.00096818	0.0008605	0.0010631	0.00094421	0.0010334	0.00084851
K00129	5.0096e-06	4.8392e-06	4.4469e-06	5.0912e-06	4.4437e-06	6.1204e-06	6.1402e-06	3.2378e-06	5.5977e-06	4.5945e-06	6.9898e-06	6.2011e-06	5.7764e-06	3.5482e-06	3.8373e-06	5.8198e-06	4.4346e-06	5.5559e-06	5.3312e-06	5.5042e-06
K00130	0.00038515	0.00030124	0.00029972	0.00032913	0.00046659	0.00040453	0.00045376	0.00044241	0.0003535	0.0003354	0.00030522	0.00046921	0.00029748	0.00044796	0.0003796	0.00045117	0.00039438	0.00041903	0.00035482	0.00030534
K00131	0.0002879	0.00035478	0.00026711	0.00032194	0.0003395	0.00037159	0.00025635	0.00035616	0.0001878	0.0003733	0.0002659	0.00037886	0.00043496	0.00031195	0.00030521	0.00026993	0.00032047	0.00018393	0.00030388	0.00030563
K00132	5.3042e-06	6.3515e-06	5.6327e-06	3.5938e-06	4.7399e-06	5.246e-06	7.0613e-06	3.5322e-06	5.3178e-06	3.1587e-06	5.8249e-06	5.3152e-06	4.9099e-06	5.3223e-06	5.3132e-06	5.5427e-06	4.7302e-06	3.509e-06	5.6273e-06	5.7939e-06
K00133	0.00070399	0.00071772	0.00074708	0.00069509	0.00068699	0.00071521	0.00072485	0.00068495	0.0007403	0.0007535	0.00071151	0.00070279	0.00071107	0.00067623	0.00071551	0.0006956	0.0007255	0.00070793	0.00070638	0.00070946
K00134	0.00098924	0.00081027	0.00096587	0.00079362	0.00080727	0.00089211	0.00094682	0.00082712	0.00093706	0.00092723	0.00083558	0.00082651	0.00085115	0.00095417	0.00089409	0.00088405	0.0008544	0.00096526	0.0009368	0.00084127
K00135	0.00047797	0.00042948	0.00049242	0.0006361	0.00045237	0.00046427	0.00049644	0.00041091	0.00040751	0.000454	0.00062297	0.00055751	0.00063974	0.00050799	0.00047996	0.00049995	0.00040207	0.00053132	0.00054556	0.0006043
K00137	2.6816e-05	6.533e-05	3.8243e-05	5.0313e-05	5.5694e-05	2.3607e-05	1.75e-05	2.2959e-05	9.3202e-05	2.9864e-05	7.5723e-05	4.4589e-05	3.9857e-05	2.9273e-05	5.2542e-05	6.956e-05	5.5285e-05	4.7079e-05	4.7388e-05	6.0836e-05
K00138	2.4458e-05	7.5008e-05	5.3066e-05	4.7917e-05	5.8656e-05	3.0019e-05	1.1052e-05	2.914e-05	0.00011251	3.6182e-05	7.4558e-05	3.9864e-05	4.3323e-05	3.016e-05	6.0511e-05	7.2055e-05	5.6172e-05	4.6786e-05	5.035e-05	6.5181e-05
K00139	5.5989e-06	2.7221e-06	4.4469e-06	5.0912e-06	5.0362e-06	4.9546e-06	7.9823e-06	5.2983e-06	3.6385e-06	4.8817e-06	5.2424e-06	7.3822e-06	5.4876e-06	6.2094e-06	4.4277e-06	4.9884e-06	4.7302e-06	5.5559e-06	6.2197e-06	3.766e-06
K00140	0.00040371	0.00026223	0.00032255	0.00037285	0.00045059	0.00045261	0.00028368	0.00056839	0.00034482	0.00042672	0.00039667	0.0004261	0.00034687	0.00045476	0.00029518	0.00048637	0.00048574	0.00046786	0.00045196	0.00037805
K00141	5.0096e-06	6.6539e-06	5.6327e-06	4.1927e-06	7.1099e-06	5.246e-06	6.4472e-06	5.0039e-06	5.5977e-06	6.3175e-06	3.7862e-06	6.7917e-06	4.3323e-06	8.2792e-06	5.9036e-06	4.4341e-06	6.2084e-06	3.2166e-06	4.7388e-06	4.9248e-06
K00142	6.1883e-06	5.7466e-06	4.1504e-06	5.3906e-06	6.8136e-06	3.4973e-06	7.0613e-06	8.5361e-06	3.3586e-06	6.3175e-06	4.6599e-06	6.7917e-06	5.1988e-06	5.0266e-06	5.3132e-06	4.7113e-06	5.3215e-06	7.0179e-06	6.5159e-06	8.4011e-06
K00143	5.3042e-06	4.5368e-06	1.0376e-05	5.0912e-06	6.5174e-06	5.246e-06	6.1402e-06	6.1813e-06	4.4782e-06	6.8918e-06	3.4949e-06	3.8388e-06	4.3323e-06	5.9137e-06	5.6084e-06	4.4341e-06	5.0259e-06	4.971e-06	5.035e-06	4.6351e-06
K00145	0.00041432	0.0004437	0.00045773	0.00048396	0.00038453	0.00035877	0.00049767	0.00037441	0.00037253	0.00044136	0.00045347	0.00050052	0.0004572	0.00040657	0.00046402	0.00038632	0.00039172	0.00039534	0.00041879	0.00049914
K00146	0.00011728	7.3496e-05	9.2792e-05	8.4453e-05	0.00018041	0.00017166	0.00012894	0.00016395	0.00014946	9.2177e-05	0.00012349	0.0001754	7.5382e-05	0.00015435	0.0001042	0.00017653	0.00019305	0.00015937	0.00012232	0.00011385
K00147	0.00054368	0.00052203	0.00051258	0.00056901	0.0005125	0.00054413	0.00055201	0.00056132	0.00057964	0.00055163	0.00054229	0.00055928	0.00056262	0.0005068	0.00052955	0.00054983	0.00048662	0.0005626	0.00054585	0.00054404
K00148	3.5951e-05	8.1662e-06	1.7195e-05	1.8568e-05	5.8064e-05	6.645e-05	2.8552e-05	7.3587e-05	6.4374e-06	2.9003e-05	2.1843e-05	5.4924e-05	1.8773e-05	4.317e-05	8.265e-06	5.0715e-05	8.2484e-05	4.0353e-05	3.2579e-05	1.9409e-05
K00149	6.1883e-06	3.0245e-06	5.6327e-06	4.7917e-06	4.7399e-06	4.9546e-06	5.2192e-06	6.4757e-06	4.4782e-06	3.1587e-06	3.4949e-06	5.9058e-06	6.0652e-06	3.5482e-06	6.4939e-06	6.3741e-06	3.8433e-06	6.7255e-06	5.3312e-06	3.1866e-06
K00150	3.5362e-06	5.7466e-06	7.4115e-06	5.6901e-06	4.1474e-06	5.246e-06	7.6753e-06	4.1209e-06	4.4782e-06	6.0303e-06	4.9511e-06	4.7246e-06	4.3323e-06	5.618e-06	6.1987e-06	3.6027e-06	4.139e-06	4.6786e-06	4.7388e-06	4.0557e-06
K00151	4.4791e-05	7.3798e-05	6.196e-05	0.00010063	8.2949e-05	0.0001396	0.00011759	9.1837e-05	2.0152e-05	5.3698e-05	0.00011242	0.00014942	8.809e-05	9.1662e-05	5.9331e-05	6.4295e-05	0.0001357	7.2811e-05	7.049e-05	0.00010313
K00152	5.5989e-06	3.9319e-06	6.5221e-06	3.2943e-06	6.5174e-06	3.2059e-06	3.6841e-06	5.887e-06	6.9971e-06	7.1789e-06	4.0774e-06	4.7246e-06	5.7764e-06	4.1396e-06	5.6084e-06	4.4341e-06	5.0259e-06	5.8483e-06	7.9967e-06	6.0836e-06
K00153	4.7149e-06	4.5368e-06	5.0398e-06	3.5938e-06	5.6286e-06	4.6631e-06	4.9122e-06	4.7096e-06	3.0787e-06	4.5945e-06	5.2424e-06	4.7246e-06	7.5093e-06	5.618e-06	4.4277e-06	4.9884e-06	3.5477e-06	4.3862e-06	3.5541e-06	4.3454e-06
K00154	0.00014233	1.2401e-05	8.1823e-05	5.9896e-05	0.00016767	0.0002148	0.00017561	0.00019133	8.2286e-05	8.2414e-05	7.4849e-05	0.00021025	6.2963e-05	0.00017475	0.0001104	0.00016656	0.00016497	0.00017662	0.00012291	6.9816e-05
K00155	5.982e-05	1.0283e-05	1.3044e-05	7.2474e-05	6.8729e-05	1.7778e-05	1.9956e-05	4.6507e-05	1.2595e-05	2.9864e-05	6.9316e-05	2.3033e-05	3.9279e-05	5.1745e-05	2.8042e-05	6.1246e-05	1.833e-05	5.1172e-05	5.035e-05	4.6061e-05
K00156	0.00025342	0.00018147	0.00020308	0.00023629	0.00027255	0.00026143	0.00010684	0.00044888	0.00031543	0.00022341	0.00024494	0.0002944	0.00014614	0.000233	0.00014759	0.0003115	0.00029002	0.00029212	0.00016823	0.00022393
K00157	5.8936e-06	6.6539e-06	5.9292e-06	2.9948e-06	7.9986e-06	4.9546e-06	7.6753e-06	7.9474e-06	4.7581e-06	5.1688e-06	3.4949e-06	3.8388e-06	8.0869e-06	5.618e-06	5.6084e-06	7.4826e-06	5.3215e-06	5.2635e-06	5.035e-06	5.5042e-06
K00158	0.00028996	0.00035266	0.0003599	0.00024468	0.00020263	0.00032059	0.00034999	0.00028934	0.00032803	0.00033885	0.00022688	0.00025424	0.00034658	0.0003356	0.00033208	0.00020757	0.00030333	0.00023686	0.00037851	0.00025087
K00161	0.00047149	0.00046003	0.0004435	0.00042376	0.00041119	0.0005179	0.00036258	0.00048803	0.00047329	0.00052779	0.00035939	0.00044293	0.00051583	0.00051863	0.00043922	0.00044258	0.00045765	0.00041523	0.00050231	0.00035111
K00162	0.00043288	0.00043099	0.00043757	0.00041059	0.00039845	0.0004873	0.00037118	0.00049038	0.00048336	0.00055105	0.00037104	0.00040455	0.0005115	0.00052632	0.00045369	0.00043482	0.00045558	0.00043482	0.00050794	0.00036067
K00163	0.0006533	0.00039893	0.00054667	0.00065616	0.0005916	0.00049575	0.00058547	0.00068171	0.00064066	0.00050942	0.00068908	0.00068743	0.00046413	0.00053608	0.00051833	0.00066013	0.00048721	0.00073893	0.00046796	0.00069237
K00164	0.00094209	0.00088286	0.0010192	0.00095175	0.00082267	0.00071113	0.00086547	0.00098872	0.0010871	0.0008876	0.00099168	0.00094286	0.0008009	0.00093466	0.00084126	0.00085274	0.00084376	0.0010088	0.00077835	0.00098786
K00166	0.00013968	0.00026646	0.00026148	0.00020335	0.00015938	0.00024715	0.00023241	0.00018279	0.00020488	0.00022915	0.00020183	0.00021556	0.00023337	0.00022472	0.00019688	0.00016545	0.00025189	0.00018334	0.00024257	0.0002193
K00167	0.00012377	0.0002468	0.0002342	0.00019646	0.00015819	0.00022325	0.00020723	0.00015365	0.0001892	0.00021738	0.00017737	0.00019991	0.00022181	0.00021378	0.00019423	0.00015991	0.00024242	0.0001813	0.00024997	0.00020018
K00169	6.0704e-05	4.809e-05	6.196e-05	1.4076e-05	2.9624e-05	5.246e-05	2.8245e-05	1.7072e-05	5.1219e-05	5.3411e-05	4.3978e-05	2.6871e-05	1.6463e-05	1.3601e-05	5.6969e-05	5.2378e-05	5.0259e-05	2.5732e-05	1.392e-05	4.4033e-05
K00170	4.7738e-05	3.6597e-05	4.5655e-05	8.9844e-06	2.4292e-05	4.226e-05	1.9649e-05	1.5895e-05	3.9464e-05	4.2212e-05	3.8444e-05	1.6241e-05	1.7618e-05	9.7576e-06	4.5753e-05	4.0461e-05	3.9911e-05	2.5148e-05	1.0366e-05	3.5922e-05
K00171	2.5342e-05	2.0264e-05	1.927e-05	9.2839e-06	1.1554e-05	2.0693e-05	1.5351e-05	8.8304e-06	2.435e-05	2.4983e-05	1.864e-05	1.1516e-05	1.0109e-05	8.5748e-06	2.1843e-05	2.1062e-05	2.2173e-05	1.7252e-05	1.007e-05	1.6223e-05
K00172	3.7719e-05	3.206e-05	3.1425e-05	7.1875e-06	1.8071e-05	2.2733e-05	1.5965e-05	1.4423e-05	3.1627e-05	3.3885e-05	2.8251e-05	1.7422e-05	1.1553e-05	1.0645e-05	3.247e-05	3.187e-05	2.8973e-05	1.8422e-05	1.0958e-05	2.1437e-05
K00174	0.00041933	0.00052294	0.00051821	0.0004037	0.00033357	0.00026726	0.0004289	0.00035793	0.00041815	0.00038077	0.00033493	0.00029972	0.00033185	0.00040568	0.00045634	0.00025136	0.00037487	0.00034095	0.00036193	0.00035603
K00175	0.00025755	0.00032151	0.0002935	0.00026594	0.00023966	0.00016816	0.00029995	0.0002346	0.00024798	0.0002438	0.00021435	0.00022472	0.00022412	0.00023743	0.00029606	0.00018485	0.00023149	0.00020615	0.0002094	0.00023813
K00176	3.1531e-05	3.4479e-05	3.5872e-05	1.7669e-05	2.0441e-05	2.9145e-05	3.0394e-05	2.0899e-05	3.1067e-05	2.1824e-05	2.6794e-05	1.5355e-05	8.9534e-06	1.4489e-05	3.365e-05	1.9676e-05	3.0451e-05	2.3686e-05	1.5697e-05	1.7961e-05
K00177	5.6578e-05	5.1719e-05	5.188e-05	3.1146e-05	3.1106e-05	5.0129e-05	4.3903e-05	2.8552e-05	3.8624e-05	3.331e-05	3.99e-05	2.067e-05	1.5307e-05	3.0455e-05	4.221e-05	2.8545e-05	5.8537e-05	3.6259e-05	3.3764e-05	3.2446e-05
K00178	5.3042e-06	7.5613e-06	5.6327e-06	7.1875e-06	4.4437e-06	5.246e-06	5.8332e-06	5.0039e-06	5.5977e-06	4.5945e-06	4.9511e-06	5.0199e-06	4.0435e-06	5.9137e-06	7.3794e-06	4.9884e-06	3.8433e-06	6.4331e-06	5.9235e-06	5.5042e-06
K00179	6.4535e-05	9.2853e-05	8.0637e-05	6.888e-05	4.888e-05	4.8963e-05	8.2893e-05	5.4749e-05	4.2823e-05	2.2398e-05	5.4462e-05	2.3328e-05	5.7764e-06	7.0373e-05	4.221e-05	1.0808e-05	7.9527e-05	5.1757e-05	6.8713e-05	2.6072e-05
K00180	2.7405e-05	3.2362e-05	3.6761e-05	2.905e-05	1.8663e-05	1.807e-05	2.9166e-05	2.5903e-05	1.9032e-05	1.0625e-05	2.2134e-05	1.063e-05	4.3323e-06	2.8977e-05	1.7415e-05	9.6997e-06	3.3112e-05	2.6317e-05	2.4583e-05	1.3905e-05
K00181	6.7776e-06	6.9564e-06	4.7434e-06	4.1927e-06	4.4437e-06	5.5375e-06	3.3771e-06	6.4757e-06	4.7581e-06	4.0202e-06	4.0774e-06	6.2011e-06	4.0435e-06	3.8439e-06	7.3794e-06	4.7113e-06	5.3215e-06	3.8014e-06	5.6273e-06	5.2145e-06
K00182	8.5457e-06	4.5368e-06	4.4469e-06	5.3906e-06	3.5549e-06	4.9546e-06	3.9912e-06	7.3587e-06	5.5977e-06	4.5945e-06	6.1161e-06	4.1341e-06	5.1988e-06	5.3223e-06	4.7228e-06	6.3741e-06	3.8433e-06	6.7255e-06	4.4426e-06	5.5042e-06
K00183	1.4439e-05	9.0735e-05	7.1743e-05	0.0001135	2.9921e-05	8.073e-05	0.00012526	1.4129e-05	2.379e-05	2.7567e-05	0.00010805	0.00012816	7.9425e-05	3.7552e-05	6.7005e-05	1.2194e-05	6.2084e-05	4.7371e-05	5.1238e-05	0.0001095
K00184	5.5989e-06	3.9319e-06	7.708e-06	6.5886e-06	5.6286e-06	5.8289e-06	4.6052e-06	5.887e-06	6.1575e-06	4.5945e-06	4.3686e-06	5.9058e-06	3.7547e-06	4.7309e-06	6.1987e-06	4.7113e-06	5.0259e-06	3.2166e-06	4.1465e-06	3.4763e-06
K00185	4.1255e-06	5.7466e-06	4.1504e-06	7.7865e-06	3.8512e-06	5.246e-06	8.5963e-06	6.4757e-06	3.9184e-06	9.189e-06	4.9511e-06	6.2011e-06	6.354e-06	5.3223e-06	5.018e-06	4.9884e-06	5.0259e-06	5.5559e-06	4.1465e-06	7.8217e-06
K00186	7.0723e-06	4.5368e-06	6.5221e-06	5.3906e-06	3.8512e-06	5.5375e-06	5.5262e-06	4.7096e-06	5.0379e-06	6.0303e-06	5.5336e-06	7.3822e-06	5.7764e-06	6.5051e-06	5.018e-06	4.4341e-06	4.139e-06	6.7255e-06	6.2197e-06	3.766e-06
K00187	3.2415e-06	6.6539e-06	5.0398e-06	4.4922e-06	4.7399e-06	6.1204e-06	4.6052e-06	4.4152e-06	5.0379e-06	5.1688e-06	3.7862e-06	3.2482e-06	7.2205e-06	4.7309e-06	4.7228e-06	3.8799e-06	4.7302e-06	5.8483e-06	5.3312e-06	6.3733e-06
K00188	5.8936e-06	1.5123e-06	7.708e-06	4.7917e-06	8.5911e-06	4.0802e-06	4.6052e-06	5.2983e-06	4.4782e-06	7.7532e-06	3.7862e-06	5.3152e-06	5.4876e-06	6.2094e-06	4.4277e-06	5.8198e-06	5.9128e-06	3.509e-06	4.4426e-06	4.6351e-06
K00189	5.3042e-06	3.9319e-06	5.3363e-06	4.1927e-06	4.4437e-06	4.6631e-06	5.5262e-06	4.7096e-06	4.4782e-06	5.1688e-06	4.0774e-06	6.2011e-06	4.3323e-06	7.0964e-06	5.3132e-06	2.4942e-06	5.9128e-06	4.3862e-06	6.812e-06	5.2145e-06
K00190	5.5989e-06	4.5368e-06	6.5221e-06	5.3906e-06	8.2949e-06	5.8289e-06	4.9122e-06	4.7096e-06	5.3178e-06	5.7431e-06	6.4073e-06	7.3822e-06	5.7764e-06	6.2094e-06	5.018e-06	2.7713e-06	3.5477e-06	6.7255e-06	4.1465e-06	5.2145e-06
K00192	7.367e-06	6.3515e-06	4.7434e-06	4.1927e-06	5.6286e-06	3.7888e-06	6.4472e-06	5.0039e-06	5.0379e-06	5.7431e-06	4.0774e-06	5.9058e-06	3.7547e-06	4.1396e-06	9.1505e-06	4.157e-06	4.139e-06	4.3862e-06	7.1082e-06	5.2145e-06
K00193	6.4829e-06	5.4441e-06	4.7434e-06	5.0912e-06	4.1474e-06	3.4973e-06	4.6052e-06	4.4152e-06	4.7581e-06	5.456e-06	3.7862e-06	6.7917e-06	7.5093e-06	5.3223e-06	4.7228e-06	3.6027e-06	4.7302e-06	5.8483e-06	5.6273e-06	4.9248e-06
K00194	5.3042e-06	4.5368e-06	6.8186e-06	6.5886e-06	5.6286e-06	4.0802e-06	7.0613e-06	4.7096e-06	3.9184e-06	6.8918e-06	4.6599e-06	5.9058e-06	6.0652e-06	4.1396e-06	7.9698e-06	4.7113e-06	5.0259e-06	4.3862e-06	5.9235e-06	4.6351e-06
K00195	6.4829e-06	7.5613e-06	5.0398e-06	4.7917e-06	4.4437e-06	5.8289e-06	6.7543e-06	4.7096e-06	5.8776e-06	4.8817e-06	3.7862e-06	6.2011e-06	6.9317e-06	5.0266e-06	5.6084e-06	5.2655e-06	5.3215e-06	5.8483e-06	6.5159e-06	5.5042e-06
K00196	5.0096e-06	7.5613e-06	5.9292e-06	8.9844e-06	5.6286e-06	4.6631e-06	6.1402e-06	6.1813e-06	5.0379e-06	5.456e-06	6.1161e-06	5.0199e-06	4.9099e-06	5.0266e-06	6.1987e-06	6.3741e-06	4.139e-06	2.9241e-06	7.1082e-06	2.8969e-06
K00197	3.5362e-06	6.049e-06	5.3363e-06	3.8932e-06	4.1474e-06	5.246e-06	7.3683e-06	4.4152e-06	5.8776e-06	6.3175e-06	4.3686e-06	7.3822e-06	4.3323e-06	3.5482e-06	4.7228e-06	4.157e-06	6.2084e-06	8.1876e-06	7.7006e-06	3.4763e-06
K00198	0.000122	0.00014881	5.0695e-05	0.00018658	0.00017597	4.7214e-05	0.00020631	8.9482e-05	2.9668e-05	0.0001588	8.3004e-05	0.00020434	0.00018484	2.4246e-05	0.00019157	0.0001175	1.7443e-05	5.1172e-05	5.3904e-05	0.00018077
K00200	5.3042e-06	5.7466e-06	5.3363e-06	7.1875e-06	5.6286e-06	4.9546e-06	5.2192e-06	5.2983e-06	4.7581e-06	4.5945e-06	5.5336e-06	6.2011e-06	6.9317e-06	5.618e-06	7.0843e-06	6.9283e-06	5.0259e-06	7.3104e-06	5.035e-06	4.0557e-06
K00201	3.8308e-06	5.1417e-06	7.4115e-06	5.3906e-06	5.0362e-06	7.2861e-06	7.0613e-06	5.887e-06	4.1983e-06	3.4459e-06	6.4073e-06	5.0199e-06	3.4658e-06	4.1396e-06	3.5421e-06	5.5427e-06	3.8433e-06	7.8952e-06	3.5541e-06	4.3454e-06
K00202	5.3042e-06	4.2343e-06	4.4469e-06	3.8932e-06	5.9249e-06	4.3717e-06	6.4472e-06	5.2983e-06	5.5977e-06	5.456e-06	3.7862e-06	5.3152e-06	3.7547e-06	5.0266e-06	5.018e-06	5.5427e-06	5.6172e-06	7.8952e-06	5.3312e-06	7.532e-06
K00203	4.7149e-06	4.5368e-06	4.1504e-06	7.7865e-06	4.7399e-06	3.4973e-06	8.5963e-06	4.1209e-06	6.7173e-06	6.3175e-06	4.9511e-06	5.0199e-06	4.6211e-06	7.0964e-06	7.0843e-06	4.4341e-06	3.8433e-06	6.1407e-06	3.5541e-06	4.0557e-06
K00204	5.5989e-06	3.9319e-06	3.5575e-06	6.888e-06	7.1099e-06	6.7032e-06	2.4561e-06	6.4757e-06	5.3178e-06	6.0303e-06	5.2424e-06	4.4293e-06	5.1988e-06	6.2094e-06	8.265e-06	5.5427e-06	5.6172e-06	4.6786e-06	5.035e-06	4.6351e-06
K00205	6.7776e-06	6.049e-06	5.3363e-06	5.9896e-06	6.2211e-06	5.246e-06	6.1402e-06	6.1813e-06	4.1983e-06	2.8716e-06	5.2424e-06	5.3152e-06	6.6429e-06	7.9835e-06	6.1987e-06	1.9399e-06	3.5477e-06	4.971e-06	6.812e-06	6.0836e-06
K00206	6.4829e-06	4.2343e-06	5.6327e-06	4.4922e-06	7.7024e-06	6.9947e-06	9.2104e-06	7.0644e-06	3.6385e-06	4.3074e-06	5.8249e-06	7.0869e-06	5.4876e-06	7.0964e-06	6.7891e-06	8.0369e-06	4.139e-06	5.5559e-06	5.035e-06	4.9248e-06
K00207	3.4183e-05	8.4686e-06	1.6602e-05	2.2461e-05	5.1843e-05	6.4992e-05	2.5789e-05	8.0946e-05	5.8776e-06	3.5033e-05	1.8931e-05	5.9058e-05	2.3394e-05	5.5293e-05	7.3794e-06	4.8498e-05	8.7214e-05	3.8599e-05	4.1761e-05	2.3465e-05
K00208	0.00039251	0.00033572	0.00039103	0.00041059	0.00035609	0.0003235	0.00038008	0.00032938	0.00035825	0.00036814	0.00042463	0.00033397	0.00034514	0.00041278	0.00038314	0.00041127	0.00038285	0.00038979	0.00042294	0.00042411
K00209	5.3042e-06	5.7466e-06	5.3363e-06	3.5938e-06	6.2211e-06	4.0802e-06	3.9912e-06	7.0644e-06	3.9184e-06	5.456e-06	4.3686e-06	2.3623e-06	3.4658e-06	4.7309e-06	4.4277e-06	2.7713e-06	2.6608e-06	4.971e-06	4.4426e-06	7.2423e-06
K00210	9.4297e-05	2.1172e-05	7.7672e-05	6.4388e-05	3.7327e-05	2.2733e-05	7.1534e-05	6.4168e-05	8.4805e-05	6.3749e-05	4.4269e-05	5.3447e-05	5.9786e-05	6.0911e-05	6.5234e-05	9.284e-05	2.7199e-05	7.3688e-05	3.9391e-05	9.502e-05
K00211	4.1255e-06	6.3515e-06	6.2257e-06	5.9896e-06	5.6286e-06	4.9546e-06	6.4472e-06	5.2983e-06	6.9971e-06	5.1688e-06	3.7862e-06	5.3152e-06	4.9099e-06	8.5748e-06	7.0843e-06	3.0485e-06	3.5477e-06	5.5559e-06	7.4044e-06	4.3454e-06
K00212	5.5989e-06	5.7466e-06	4.7434e-06	5.3906e-06	3.5549e-06	4.9546e-06	6.4472e-06	6.1813e-06	4.7581e-06	4.3074e-06	4.6599e-06	5.9058e-06	5.7764e-06	8.5748e-06	6.4939e-06	6.9283e-06	4.4346e-06	5.5559e-06	6.5159e-06	6.3733e-06
K00213	6.1883e-06	4.8392e-06	4.4469e-06	4.7917e-06	4.7399e-06	3.7888e-06	4.2982e-06	4.7096e-06	4.7581e-06	5.456e-06	4.9511e-06	6.4964e-06	5.4876e-06	6.5051e-06	8.8553e-06	5.2655e-06	7.6866e-06	5.8483e-06	6.2197e-06	4.0557e-06
K00214	7.0723e-06	6.049e-06	5.0398e-06	4.1927e-06	5.3324e-06	5.8289e-06	5.2192e-06	3.8265e-06	5.3178e-06	3.733e-06	4.3686e-06	4.7246e-06	4.6211e-06	4.4353e-06	4.1325e-06	5.8198e-06	4.4346e-06	5.2635e-06	6.2197e-06	5.7939e-06
K00215	0.00046677	0.00040559	0.00042483	0.00041658	0.00039815	0.00035527	0.00043319	0.00045683	0.00049204	0.00047984	0.00039114	0.00042374	0.00043612	0.00035246	0.00045605	0.00044729	0.00037605	0.00042956	0.00037733	0.00043744
K00216	4.9801e-05	8.0755e-05	6.9668e-05	5.5703e-05	8.0579e-05	6.1495e-05	5.035e-05	6.7406e-05	8.0887e-05	7.0353e-05	9.0577e-05	8.8882e-05	7.7115e-05	8.2792e-05	7.7041e-05	6.6235e-05	9.4013e-05	5.3804e-05	9.7146e-05	7.532e-05
K00217	5.0096e-06	3.327e-06	6.5221e-06	4.1927e-06	5.9249e-06	5.5375e-06	6.1402e-06	6.4757e-06	3.9184e-06	4.8817e-06	5.5336e-06	6.2011e-06	4.9099e-06	6.8007e-06	7.0843e-06	4.9884e-06	5.6172e-06	3.2166e-06	5.035e-06	7.532e-06
K00218	4.4202e-06	5.4441e-06	6.2257e-06	4.4922e-06	6.5174e-06	3.4973e-06	7.6753e-06	3.5322e-06	2.519e-06	4.5945e-06	3.7862e-06	5.9058e-06	4.3323e-06	5.0266e-06	6.1987e-06	4.7113e-06	4.139e-06	4.3862e-06	7.4044e-06	6.0836e-06
K00219	0.00028024	0.00010465	0.00018262	0.00016621	0.00040112	0.00040482	0.0003153	0.00041356	0.00025218	0.00020417	0.00023445	0.00042817	0.00014874	0.00033708	0.00023939	0.00039464	0.00040887	0.00035791	0.00028848	0.00021003
K00220	0.0001276	1.3308e-05	6.1367e-05	7.2474e-05	0.00013331	0.00011017	0.00014245	0.00011362	6.5213e-05	6.9492e-05	9.2324e-05	0.00013524	6.1519e-05	0.00012448	0.00011069	0.00012665	6.8588e-05	0.00012457	0.00010337	6.0836e-05
K00221	2.6521e-05	4.2343e-05	2.6681e-05	2.7552e-05	6.2211e-06	8.7434e-06	3.0701e-05	2.6786e-05	3.7225e-05	3.5895e-05	1.4853e-05	2.3623e-05	1.8773e-05	2.8681e-05	2.3909e-05	7.7597e-06	2.986e-05	4.3862e-05	1.7474e-05	1.2167e-05
K00222	5.5989e-06	6.3515e-06	1.7788e-06	4.7917e-06	4.7399e-06	4.9546e-06	4.9122e-06	2.3548e-06	4.7581e-06	4.5945e-06	1.165e-06	3.5435e-06	5.7764e-06	5.0266e-06	5.6084e-06	4.9884e-06	2.3651e-06	5.5559e-06	5.3312e-06	6.663e-06
K00223	4.1255e-06	6.6539e-06	5.9292e-06	6.2891e-06	5.6286e-06	4.9546e-06	5.8332e-06	7.9474e-06	6.1575e-06	4.3074e-06	6.1161e-06	5.0199e-06	5.4876e-06	5.0266e-06	4.4277e-06	4.157e-06	3.8433e-06	4.971e-06	5.3312e-06	5.2145e-06
K00224	5.3042e-06	3.9319e-06	5.9292e-06	5.6901e-06	5.3324e-06	3.4973e-06	2.7631e-06	3.5322e-06	4.7581e-06	5.1688e-06	6.9898e-06	6.2011e-06	5.4876e-06	3.8439e-06	4.1325e-06	5.8198e-06	6.2084e-06	3.509e-06	6.5159e-06	3.766e-06
K00225	3.2415e-06	6.6539e-06	5.0398e-06	4.4922e-06	5.6286e-06	4.6631e-06	7.0613e-06	5.887e-06	4.1983e-06	6.0303e-06	3.2037e-06	7.6775e-06	5.1988e-06	6.2094e-06	6.4939e-06	5.2655e-06	3.252e-06	4.971e-06	5.9235e-06	3.766e-06
K00226	0.00077648	0.00068082	0.00070706	0.00064628	0.00061737	0.00071258	0.00071043	0.00067965	0.00080887	0.00067855	0.00062996	0.00060357	0.00065735	0.00066085	0.00073322	0.00066429	0.00062144	0.0007091	0.00069275	0.00063385
K00227	4.7149e-06	5.1417e-06	4.1504e-06	5.3906e-06	4.1474e-06	2.9145e-06	6.7543e-06	3.5322e-06	3.6385e-06	2.0101e-06	4.0774e-06	6.2011e-06	4.6211e-06	4.7309e-06	4.4277e-06	5.5427e-06	3.252e-06	4.3862e-06	6.2197e-06	4.6351e-06
K00228	0.00012318	4.1436e-05	7.2929e-05	0.000115	0.00017301	0.0001192	8.3507e-05	0.00013305	7.8088e-05	7.4374e-05	0.0001363	0.00012107	9.4733e-05	0.00013128	9.062e-05	0.00016018	0.00011678	0.00013012	0.0001007	0.00010081
K00230	3.1825e-05	4.8392e-05	2.935e-05	4.3425e-05	3.4661e-05	1.6904e-05	1.2894e-05	4.0326e-05	7.0531e-05	3.532e-05	4.7764e-05	2.3918e-05	1.9351e-05	1.5671e-05	2.1843e-05	3.1593e-05	3.7546e-05	5.205e-05	2.1621e-05	3.5922e-05
K00231	0.00032739	0.00055318	0.00050576	0.00047887	0.00026514	0.00026755	0.00028675	0.00048038	0.00050463	0.0004695	0.0004159	0.00038299	0.00041388	0.00034004	0.00036395	0.00028157	0.00030274	0.0003895	0.00035423	0.00045192
K00232	3.8308e-06	5.7466e-06	5.9292e-06	6.2891e-06	4.4437e-06	5.8289e-06	5.8332e-06	3.8265e-06	6.4374e-06	4.0202e-06	6.4073e-06	5.3152e-06	2.8882e-06	4.4353e-06	5.9036e-06	5.5427e-06	6.5041e-06	5.8483e-06	7.4044e-06	4.9248e-06
K00234	2.3574e-06	4.8392e-06	4.4469e-06	5.6901e-06	3.8512e-06	2.623e-06	7.0613e-06	4.4152e-06	4.7581e-06	2.5844e-06	5.2424e-06	4.7246e-06	7.2205e-06	5.9137e-06	5.018e-06	4.157e-06	5.0259e-06	5.5559e-06	3.8503e-06	6.0836e-06
K00235	5.3042e-06	4.2343e-06	4.1504e-06	7.7865e-06	4.1474e-06	3.2059e-06	1.8421e-06	2.9435e-06	6.1575e-06	5.1688e-06	6.1161e-06	5.3152e-06	5.4876e-06	5.618e-06	5.018e-06	4.7113e-06	5.0259e-06	5.5559e-06	3.5541e-06	5.7939e-06
K00236	5.3042e-06	6.3515e-06	4.1504e-06	5.0912e-06	4.1474e-06	6.1204e-06	5.2192e-06	5.0039e-06	3.9184e-06	4.8817e-06	3.7862e-06	6.7917e-06	3.7547e-06	6.2094e-06	5.6084e-06	5.8198e-06	5.0259e-06	5.5559e-06	2.9618e-06	6.0836e-06
K00237	6.1883e-06	6.3515e-06	4.1504e-06	5.0912e-06	5.9249e-06	5.246e-06	5.2192e-06	4.7096e-06	3.9184e-06	4.0202e-06	3.4949e-06	5.3152e-06	4.6211e-06	4.7309e-06	6.1987e-06	4.9884e-06	3.5477e-06	5.2635e-06	3.5541e-06	5.5042e-06
K00239	0.000709	0.00066328	0.00076042	0.00072714	0.00060582	0.00053131	0.00064196	0.00075912	0.00076381	0.00061021	0.00068966	0.00062336	0.00055396	0.00069693	0.00067861	0.00063962	0.0005901	0.00076057	0.00061575	0.00073292
K00240	0.00031059	0.00027735	0.00032581	0.00031745	0.00026929	0.00021072	0.00028092	0.00029965	0.00033698	0.00026849	0.00029649	0.00027964	0.00022701	0.00029864	0.00026832	0.00026577	0.00027406	0.00030177	0.00024671	0.00030012
K00241	0.00023869	0.00023198	0.00027185	0.00025007	0.0001893	0.00015301	0.00022504	0.00026786	0.00028073	0.00021594	0.00022513	0.00020316	0.00017849	0.00023477	0.00021932	0.00019261	0.00019246	0.0002389	0.00018985	0.00022509
K00242	5.9231e-05	4.809e-05	4.9509e-05	6.7982e-05	7.2284e-05	6.5284e-05	7.8288e-05	5.7398e-05	5.0659e-05	5.657e-05	7.019e-05	8.15e-05	6.845e-05	6.1798e-05	5.6379e-05	6.8729e-05	6.6223e-05	7.0472e-05	6.042e-05	7.9376e-05
K00243	0.00031118	0.00034358	0.00033678	0.00024527	0.00026277	0.00035702	0.00032973	0.00029729	0.0002992	0.00034315	0.00022659	0.00026045	0.00035005	0.00033028	0.0003185	0.00025635	0.00033319	0.00029007	0.00034978	0.00022538
K00244	0.00071195	0.00059764	0.00054667	0.00058309	0.00054035	0.00047855	0.00062385	0.00037765	0.00057601	0.00068114	0.00059792	0.0005891	0.00066371	0.00042312	0.0006674	0.00054069	0.00050673	0.00063863	0.00061753	0.00053767
K00245	8.0447e-05	6.4422e-05	6.3146e-05	6.4388e-05	8.0875e-05	4.3717e-05	2.8859e-05	4.1209e-05	8.4805e-05	6.662e-05	0.00010892	4.1045e-05	4.8522e-05	5.1153e-05	6.9072e-05	9.09e-05	6.0902e-05	6.4039e-05	4.9165e-05	7.0685e-05
K00246	5.2453e-05	5.2627e-05	4.7434e-05	3.8633e-05	5.2139e-05	4.7797e-05	1.8728e-05	2.6786e-05	5.4858e-05	5.1401e-05	6.5821e-05	3.2777e-05	2.946e-05	2.395e-05	5.8445e-05	6.2632e-05	4.7302e-05	4.357e-05	2.4879e-05	5.7939e-05
K00247	2.1512e-05	2.4801e-05	1.8084e-05	3.444e-05	3.6142e-05	1.5155e-05	1.1666e-05	2.8846e-05	2.547e-05	2.4121e-05	3.7862e-05	2.1851e-05	2.0506e-05	3.3117e-05	3.0698e-05	3.8521e-05	2.6312e-05	3.0996e-05	2.1917e-05	3.0997e-05
K00248	0.00019154	0.00027674	0.00013252	0.0003468	0.00030069	0.00022383	0.00036627	0.0002446	6.3534e-05	0.00023432	0.00021581	0.00043112	0.00031424	0.00012833	0.00030639	0.00020425	0.00019098	0.00017019	0.00014039	0.00034647
K00249	0.00026285	0.00012763	0.000201	0.00026414	0.00039075	0.00057094	0.00041416	0.00052365	8.5645e-05	0.00024667	0.00027319	0.00055337	0.0002221	0.00043022	0.00017711	0.00036221	0.00055876	0.0003509	0.00032342	0.00027984
K00251	7.0723e-06	3.0245e-06	4.7434e-06	5.3906e-06	4.1474e-06	5.246e-06	7.3683e-06	7.3587e-06	3.9184e-06	3.1587e-06	4.9511e-06	4.4293e-06	3.177e-06	5.0266e-06	3.247e-06	3.6027e-06	4.4346e-06	5.2635e-06	7.7006e-06	5.7939e-06
K00252	0.0001659	0.00017119	0.00019626	0.00022521	0.00023374	0.00026667	0.00029749	0.00019515	0.00011279	0.00013094	0.0002295	0.00027993	0.00021546	0.00024364	0.00023791	0.00019649	0.00019512	0.0002044	0.00021177	0.00022857
K00253	0.00011876	1.5727e-05	4.8916e-05	8.3255e-05	0.00015464	0.00011949	8.9954e-05	0.00013982	3.4426e-05	8.3276e-05	8.912e-05	0.00012432	6.4407e-05	0.00014607	7.7041e-05	0.00013718	0.00010229	0.00012164	9.8923e-05	7.561e-05
K00254	4.7149e-06	4.8392e-06	4.1504e-06	5.0912e-06	6.5174e-06	4.6631e-06	7.6753e-06	3.2378e-06	4.4782e-06	6.6046e-06	2.0387e-06	4.7246e-06	5.1988e-06	6.8007e-06	3.5421e-06	5.5427e-06	4.139e-06	7.6028e-06	3.5541e-06	4.3454e-06
K00255	0.00013968	1.0283e-05	7.708e-05	4.3125e-05	0.00013331	0.00015447	0.00018697	0.00011862	7.9488e-05	5.3698e-05	7.1063e-05	0.0001757	4.8522e-05	0.00015494	0.00013608	0.00011612	8.337e-05	0.00015498	0.00011077	5.6201e-05
K00256	2.9468e-06	5.1417e-06	7.4115e-06	5.3906e-06	4.1474e-06	6.7032e-06	7.3683e-06	2.0604e-06	3.3586e-06	5.1688e-06	6.6986e-06	6.7917e-06	4.6211e-06	5.0266e-06	5.3132e-06	4.7113e-06	6.7997e-06	6.1407e-06	4.7388e-06	4.9248e-06
K00257	0.0010541	0.00070925	0.00095341	0.00098978	0.0013752	0.0014281	0.001182	0.0014037	0.00055837	0.00091345	0.0011868	0.0014853	0.00090689	0.0015083	0.00092361	0.0011121	0.0015323	0.0011436	0.001294	0.0010391
K00258	3.5362e-06	6.6539e-06	4.7434e-06	6.2891e-06	5.9249e-06	3.7888e-06	4.9122e-06	4.7096e-06	5.8776e-06	4.5945e-06	2.3299e-06	6.2011e-06	8.6646e-06	2.9568e-06	5.9036e-06	7.4826e-06	5.6172e-06	5.5559e-06	2.3694e-06	6.0836e-06
K00259	0.00035214	0.00048543	0.00050131	0.00043904	0.00032972	0.00032729	0.00038315	0.00036705	0.00043354	0.0004069	0.00040512	0.00034726	0.00040752	0.00040716	0.00048114	0.00036166	0.00038492	0.00032458	0.0003951	0.00046032
K00260	0.00013703	0.00020294	0.00022798	0.0001177	7.6135e-05	7.6942e-05	0.0001928	8.1829e-05	0.00016457	0.00020704	0.00012553	0.00010335	0.00016434	0.00020846	0.00015261	8.2309e-05	0.00016112	0.00012954	0.00017297	0.00014456
K00261	0.0001108	6.0793e-05	7.9451e-05	0.00015154	0.00012946	0.00012241	0.00015903	0.00011156	4.982e-05	7.6671e-05	0.00016077	0.00015089	0.00010398	0.00012478	0.00012811	0.00011806	7.2727e-05	0.00013597	0.00010425	0.00013094
K00262	0.00063798	0.00055923	0.000611	0.00053068	0.00043104	0.00064176	0.00056521	0.00055543	0.00066333	0.00054416	0.0005388	0.00053831	0.00046442	0.00050178	0.00054372	0.00055648	0.00055107	0.00063776	0.0005035	0.00054028
K00263	4.3023e-05	0.00010283	9.9314e-05	0.00010602	9.1836e-05	0.00013115	8.32e-05	8.7127e-05	3.7785e-05	8.8444e-05	0.00012436	0.00013111	9.8487e-05	0.0001162	7.7632e-05	5.5427e-05	0.00015521	6.3746e-05	0.00011018	0.00011704
K00264	5.0096e-06	6.3515e-06	3.854e-06	5.6901e-06	8.2949e-06	5.8289e-06	4.2982e-06	3.8265e-06	6.7173e-06	5.456e-06	6.9898e-06	6.2011e-06	4.9099e-06	3.8439e-06	2.9518e-06	4.4341e-06	5.0259e-06	4.3862e-06	4.1465e-06	4.9248e-06
K00265	0.001436	0.0015147	0.0015588	0.0016373	0.001334	0.0014016	0.0014872	0.0014338	0.0014873	0.0014444	0.001527	0.0016025	0.0015258	0.0015597	0.0015137	0.0013444	0.0015302	0.0014238	0.0015783	0.0015357
K00266	0.00082893	0.00081541	0.0006783	0.0009194	0.00085111	0.00068111	0.00091981	0.00074882	0.00063674	0.00073972	0.00070248	0.00088557	0.00080667	0.00070136	0.00085454	0.00076683	0.0006782	0.00078396	0.0007511	0.00081433
K00270	5.5989e-06	6.049e-06	6.2257e-06	5.9896e-06	5.0362e-06	6.7032e-06	7.6753e-06	8.2417e-06	6.4374e-06	4.0202e-06	4.0774e-06	4.4293e-06	4.3323e-06	5.9137e-06	5.3132e-06	4.9884e-06	5.9128e-06	4.971e-06	3.8503e-06	6.9526e-06
K00271	6.4829e-06	5.4441e-06	4.4469e-06	3.8932e-06	5.3324e-06	2.623e-06	4.6052e-06	2.6491e-06	4.1983e-06	5.1688e-06	4.0774e-06	7.6775e-06	4.9099e-06	6.5051e-06	6.7891e-06	6.0969e-06	5.6172e-06	6.1407e-06	5.035e-06	4.6351e-06
K00272	3.8308e-06	5.7466e-06	5.3363e-06	4.1927e-06	5.0362e-06	3.2059e-06	6.7543e-06	7.6531e-06	5.0379e-06	4.8817e-06	4.6599e-06	6.4964e-06	4.3323e-06	6.5051e-06	4.4277e-06	6.0969e-06	5.3215e-06	3.509e-06	5.3312e-06	5.2145e-06
K00273	5.0096e-06	8.1662e-06	4.4469e-06	8.6849e-06	5.0362e-06	3.7888e-06	7.3683e-06	4.4152e-06	5.3178e-06	4.5945e-06	4.6599e-06	3.8388e-06	5.1988e-06	5.9137e-06	5.6084e-06	4.7113e-06	6.5041e-06	6.4331e-06	6.812e-06	4.0557e-06
K00274	0.00014999	0.000346	0.00023835	0.0003459	0.00033505	0.00023695	0.00029934	0.00025432	9.0683e-05	0.00030439	0.00028047	0.00041754	0.00037864	0.00024098	0.00030344	0.00016933	0.00030865	0.00012837	0.00028285	0.00035256
K00275	0.00011758	7.8033e-05	8.4788e-05	0.0001162	0.00011672	0.00011512	0.0001357	0.00010302	8.4805e-05	0.00010366	0.00013601	0.00012697	9.3866e-05	0.00013779	9.3276e-05	0.0001369	0.00012949	0.00012515	0.00010514	0.00013297
K00276	0.00012229	0.00010556	0.00011443	9.7032e-05	0.00017893	0.00014893	0.0001403	0.00012569	0.00020991	9.1316e-05	0.00016368	0.00018456	9.8776e-05	0.00013661	0.00015202	0.00018623	0.00014161	0.00015966	0.00014246	0.00013934
K00277	5.8936e-06	4.5368e-06	4.7434e-06	3.2943e-06	6.5174e-06	4.9546e-06	3.9912e-06	8.2417e-06	5.3178e-06	5.456e-06	4.9511e-06	3.5435e-06	4.0435e-06	5.618e-06	5.3132e-06	3.0485e-06	5.0259e-06	8.48e-06	3.2579e-06	5.7939e-06
K00278	0.00032533	0.00033542	0.00033204	0.0003477	0.00034394	0.00032584	0.00041385	0.00033703	0.00028045	0.00036727	0.00031891	0.00038801	0.00032146	0.00036931	0.00028337	0.00034669	0.00042838	0.0003275	0.00039273	0.00038703
K00279	5.3042e-06	6.9564e-06	3.854e-06	5.9896e-06	6.8136e-06	6.4118e-06	4.6052e-06	5.2983e-06	7.277e-06	4.3074e-06	3.7862e-06	5.3152e-06	3.7547e-06	6.5051e-06	3.247e-06	5.5427e-06	6.7997e-06	7.3104e-06	5.3312e-06	4.6351e-06
K00280	7.0723e-05	3.2362e-05	6.6407e-05	6.4089e-05	4.1771e-05	2.2733e-05	2.057e-05	7.8297e-05	7.7249e-05	4.5371e-05	4.1065e-05	5.64e-05	4.7078e-05	3.4891e-05	6.8776e-05	7.3717e-05	7.391e-06	4.8248e-05	2.4879e-05	6.663e-05
K00281	0.00052571	0.00046699	0.00048708	0.00065376	0.00065263	0.0005963	0.0004553	0.00075618	0.00047161	0.00037302	0.00062384	0.00061273	0.00040926	0.00058575	0.00046963	0.00062632	0.00069535	0.00062226	0.00048839	0.00062371
K00282	9.1645e-05	0.00021777	0.00021404	0.00013836	8.6503e-05	0.00011804	0.00015627	0.0001304	0.00015953	0.0002056	0.00011271	0.00013642	0.00019178	0.00017298	0.00015556	9.6165e-05	0.00016408	0.00010585	0.00020466	0.00015904
K00283	0.00010844	0.00026827	0.00021731	0.00017609	0.0001028	0.00011804	0.00017193	0.0001404	0.00018249	0.00023403	0.00011912	0.00016448	0.00022355	0.00019456	0.00017917	9.3394e-05	0.00017975	0.0001158	0.00021769	0.00016918
K00284	0.00014587	0.000173	5.8699e-05	0.00019915	0.00020708	5.5958e-05	0.00024622	0.00011509	3.4146e-05	0.00017287	9.4072e-05	0.00022944	0.00021228	2.9568e-05	0.00022876	0.00012914	2.306e-05	6.0237e-05	5.2423e-05	0.000208
K00285	0.00043082	0.0001972	0.00030802	0.00031266	0.00045622	0.00041852	0.00034662	0.00040326	0.00027485	0.00035091	0.00040483	0.00042226	0.00027611	0.00045506	0.00034861	0.00047029	0.00045676	0.00041581	0.00039036	0.00036501
K00286	0.00051097	0.00056921	0.00058818	0.0005196	0.00049739	0.00057764	0.00052038	0.00050628	0.00058972	0.00062055	0.00052977	0.00049609	0.00058168	0.00053282	0.00053604	0.00051464	0.00052387	0.000536	0.00058228	0.00054231
K00287	0.00027729	0.00026827	0.00027808	0.00026115	0.00023877	0.00027979	0.00033219	0.00027227	0.00030815	0.00025988	0.00027173	0.00026222	0.00027236	0.00027233	0.00026212	0.00024803	0.00024893	0.00029007	0.0002713	0.00024276
K00288	4.4202e-06	3.327e-06	5.6327e-06	5.6901e-06	7.4061e-06	4.0802e-06	6.1402e-06	4.4152e-06	3.6385e-06	7.7532e-06	5.2424e-06	4.7246e-06	4.0435e-06	5.618e-06	5.9036e-06	4.9884e-06	3.252e-06	4.971e-06	4.4426e-06	4.3454e-06
K00289	3.2415e-06	2.7221e-06	5.0398e-06	5.0912e-06	6.5174e-06	4.3717e-06	4.9122e-06	5.0039e-06	5.8776e-06	4.5945e-06	7.5723e-06	5.0199e-06	6.354e-06	4.7309e-06	3.8373e-06	4.9884e-06	4.4346e-06	4.6786e-06	5.9235e-06	6.3733e-06
K00290	0.00023987	0.00018571	0.00014793	0.00018598	0.00020204	0.00017079	0.0002235	0.00018367	0.00015366	0.00017718	0.00016106	0.00013524	0.00014008	0.00012064	0.00021548	0.00019094	0.00014339	0.00014299	0.0001238	0.00016397
K00291	5.5989e-06	6.9564e-06	4.7434e-06	5.9896e-06	6.5174e-06	3.7888e-06	4.9122e-06	6.1813e-06	3.3586e-06	2.8716e-06	5.2424e-06	3.8388e-06	4.3323e-06	3.8439e-06	6.4939e-06	3.3256e-06	5.6172e-06	6.1407e-06	5.035e-06	4.6351e-06
K00292	4.7149e-06	6.3515e-06	4.7434e-06	5.3906e-06	4.7399e-06	5.5375e-06	6.1402e-06	4.1209e-06	3.3586e-06	6.0303e-06	4.6599e-06	3.5435e-06	4.0435e-06	4.1396e-06	5.018e-06	4.4341e-06	4.139e-06	7.0179e-06	4.7388e-06	4.9248e-06
K00293	5.3042e-06	5.1417e-06	5.3363e-06	5.6901e-06	5.0362e-06	4.0802e-06	4.9122e-06	4.4152e-06	6.1575e-06	4.0202e-06	6.4073e-06	5.9058e-06	6.0652e-06	5.3223e-06	5.018e-06	4.157e-06	5.3215e-06	5.5559e-06	5.3312e-06	6.3733e-06
K00294	0.00012848	0.00037262	0.00031454	0.00027522	0.00013657	0.00020051	0.00032359	0.00011332	0.00020768	0.00019498	0.00027173	0.00029027	0.00029575	0.00024571	0.00027776	7.0669e-05	0.00024124	0.00017954	0.0002399	0.00027926
K00295	4.7149e-06	4.2343e-06	5.6327e-06	5.3906e-06	5.6286e-06	5.246e-06	5.2192e-06	4.1209e-06	6.9971e-06	4.0202e-06	3.4949e-06	6.2011e-06	7.7981e-06	5.9137e-06	4.4277e-06	4.157e-06	4.4346e-06	6.1407e-06	4.4426e-06	6.0836e-06
K00296	6.1883e-06	4.2343e-06	5.0398e-06	4.7917e-06	5.9249e-06	4.3717e-06	7.0613e-06	5.2983e-06	5.5977e-06	2.5844e-06	4.6599e-06	5.9058e-06	4.0435e-06	2.9568e-06	7.3794e-06	6.9283e-06	5.3215e-06	4.3862e-06	3.8503e-06	3.1866e-06
K00297	0.00033741	0.00021686	0.00023628	0.00027432	0.00028736	0.00024919	0.00029197	0.00032849	0.00027513	0.00020934	0.00027726	0.00020021	0.00015972	0.0002806	0.00022493	0.00026161	0.00027081	0.00031142	0.00023339	0.00022915
K00298	2.9468e-06	5.4441e-06	6.2257e-06	4.4922e-06	5.0362e-06	5.8289e-06	6.4472e-06	6.1813e-06	5.5977e-06	7.7532e-06	4.0774e-06	6.4964e-06	3.7547e-06	3.5482e-06	3.8373e-06	3.6027e-06	5.0259e-06	4.6786e-06	5.6273e-06	5.5042e-06
K00299	8.8109e-05	7.7125e-05	8.538e-05	6.8581e-05	0.00011879	0.00015447	0.00013785	0.00013746	0.00010104	0.0001005	8.0674e-05	0.00013288	0.00010369	0.00012123	9.3571e-05	0.00014466	0.00013925	0.0001041	0.00011166	9.3861e-05
K00300	6.4829e-06	5.4441e-06	6.2257e-06	5.6901e-06	6.8136e-06	5.246e-06	7.0613e-06	4.1209e-06	3.6385e-06	8.3276e-06	4.6599e-06	6.4964e-06	6.9317e-06	5.0266e-06	6.1987e-06	3.3256e-06	3.5477e-06	7.3104e-06	4.4426e-06	3.4763e-06
K00301	5.8347e-05	6.5027e-05	6.0774e-05	9.0143e-05	9.8649e-05	3.8471e-05	2.057e-05	6.0047e-05	2.1831e-05	7.4087e-05	0.00011737	5.64e-05	8.2314e-05	0.00010083	7.1433e-05	6.4018e-05	8.337e-05	5.0003e-05	9.6553e-05	8.4591e-05
K00302	0.00018093	2.843e-05	5.5142e-05	0.00018059	0.00023196	0.00018274	8.9033e-05	0.00025137	1.6513e-05	0.00014042	0.00018232	0.0001633	0.00011148	0.00021319	8.6782e-05	0.00021894	0.00022173	0.00017837	0.00016023	0.00014195
K00303	8.2216e-05	1.8752e-05	2.2827e-05	7.6966e-05	0.00010398	7.8399e-05	3.9912e-05	0.00012304	7.277e-06	6.26e-05	8.2713e-05	7.1755e-05	5.141e-05	0.00010024	4.0735e-05	9.8937e-05	0.0001017	9.0064e-05	7.4636e-05	5.8228e-05
K00304	2.7995e-05	8.1662e-06	8.0044e-06	2.9649e-05	3.8808e-05	3.0602e-05	1.2587e-05	3.6794e-05	6.7173e-06	2.1537e-05	2.9124e-05	2.8643e-05	1.4152e-05	3.3708e-05	1.0331e-05	3.3533e-05	3.8433e-05	2.5148e-05	2.1325e-05	2.3465e-05
K00305	4.3907e-05	1.0283e-05	1.4527e-05	4.4323e-05	5.836e-05	5.1003e-05	1.9342e-05	5.622e-05	5.8776e-06	3.13e-05	4.0192e-05	3.6321e-05	2.7438e-05	5.4997e-05	1.653e-05	4.8775e-05	5.2624e-05	4.357e-05	3.643e-05	3.9109e-05
K00306	4.4202e-06	5.1417e-06	5.9292e-06	5.0912e-06	3.8512e-06	6.1204e-06	6.7543e-06	7.3587e-06	5.0379e-06	4.8817e-06	4.6599e-06	4.1341e-06	5.4876e-06	6.5051e-06	4.4277e-06	5.8198e-06	4.7302e-06	4.3862e-06	6.5159e-06	5.2145e-06
K00308	6.7776e-06	6.049e-06	5.3363e-06	4.7917e-06	7.4061e-06	4.3717e-06	7.6753e-06	5.2983e-06	6.7173e-06	6.6046e-06	4.6599e-06	5.6105e-06	4.9099e-06	4.1396e-06	6.7891e-06	4.4341e-06	4.4346e-06	4.6786e-06	5.6273e-06	3.766e-06
K00309	6.7776e-06	5.4441e-06	5.3363e-06	5.0912e-06	6.2211e-06	4.9546e-06	5.8332e-06	3.2378e-06	4.4782e-06	3.733e-06	5.5336e-06	5.6105e-06	5.4876e-06	7.0964e-06	5.3132e-06	4.4341e-06	4.139e-06	6.7255e-06	4.4426e-06	5.5042e-06
K00310	4.7149e-06	5.1417e-06	6.5221e-06	4.4922e-06	3.8512e-06	3.7888e-06	7.9823e-06	4.4152e-06	6.1575e-06	6.3175e-06	4.9511e-06	5.3152e-06	4.3323e-06	3.2525e-06	5.018e-06	4.9884e-06	4.4346e-06	6.4331e-06	6.2197e-06	4.9248e-06
K00311	0.0002328	2.0869e-05	0.00012748	0.00014315	0.00017567	0.00015767	0.00019894	0.00020045	8.8724e-05	0.00017545	0.00015582	0.00017333	0.00012881	0.00024542	0.00011128	0.00022004	0.00019394	0.00022721	0.00018007	0.00017382
K00312	6.7776e-06	6.049e-06	6.5221e-06	6.888e-06	6.8136e-06	6.9947e-06	6.4472e-06	4.4152e-06	4.4782e-06	8.0404e-06	5.5336e-06	6.2011e-06	3.4658e-06	5.0266e-06	5.6084e-06	4.4341e-06	5.3215e-06	5.2635e-06	6.5159e-06	3.766e-06
K00313	0.0001105	0.00017572	0.00016157	0.00017879	0.00017715	7.2278e-05	4.6359e-05	0.00012863	0.00032943	0.00011285	0.00022746	0.00015148	0.00013141	0.00010911	0.00019216	0.00026134	0.00013333	0.00015498	0.00013032	0.00021582
K00314	5.5989e-06	6.3515e-06	5.3363e-06	5.0912e-06	5.6286e-06	5.246e-06	5.5262e-06	6.4757e-06	4.1983e-06	3.4459e-06	4.0774e-06	5.9058e-06	3.4658e-06	6.2094e-06	3.8373e-06	3.8799e-06	7.0954e-06	5.2635e-06	4.4426e-06	6.0836e-06
K00315	0.0001055	2.4196e-05	2.4606e-05	0.00013686	0.00011465	2.9436e-05	2.7324e-05	8.3301e-05	1.1755e-05	6.2887e-05	0.0001296	3.573e-05	6.2674e-05	9.521e-05	7.409e-05	0.00011944	3.2816e-05	0.00010088	7.2563e-05	8.3432e-05
K00316	4.8917e-05	1.1191e-05	2.2827e-05	3.4141e-05	8.7096e-05	0.00010055	4.6359e-05	0.00011274	5.8776e-06	4.9965e-05	2.1552e-05	7.4708e-05	3.1481e-05	7.2443e-05	7.3794e-06	7.5103e-05	0.00012033	5.6728e-05	4.9165e-05	3.737e-05
K00317	4.155e-05	0.00011554	0.00010406	4.2227e-05	4.1474e-05	9.0348e-05	7.6753e-05	6.564e-05	6.8572e-05	4.4797e-05	3.524e-05	4.0455e-05	7.7404e-05	0.00011177	7.9698e-05	7.0115e-05	3.9616e-05	6.1407e-05	5.1831e-05	3.737e-05
K00318	0.00010874	0.0001975	0.00019033	0.00016232	0.0001025	0.00011745	0.00016087	0.0001301	0.000185	0.00015392	0.00014329	0.00016152	0.00016578	0.00015228	0.00017799	8.7297e-05	0.00013186	0.00013597	0.00014216	0.00017063
K00319	7.9563e-06	3.6294e-06	6.2257e-06	7.7865e-06	7.1099e-06	4.6631e-06	5.2192e-06	4.1209e-06	3.6385e-06	2.2973e-06	5.5336e-06	6.7917e-06	6.354e-06	5.9137e-06	4.4277e-06	4.9884e-06	3.5477e-06	4.971e-06	3.8503e-06	4.6351e-06
K00320	7.367e-06	4.2343e-06	7.4115e-06	4.1927e-06	5.3324e-06	6.7032e-06	3.9912e-06	4.1209e-06	5.0379e-06	5.7431e-06	6.1161e-06	4.4293e-06	5.7764e-06	6.8007e-06	6.7891e-06	4.4341e-06	6.7997e-06	4.3862e-06	6.2197e-06	5.5042e-06
K00321	4.7149e-06	4.8392e-06	3.5575e-06	5.9896e-06	6.2211e-06	6.1204e-06	4.9122e-06	5.887e-06	4.1983e-06	6.6046e-06	4.0774e-06	7.6775e-06	6.354e-06	3.5482e-06	3.8373e-06	4.7113e-06	7.9823e-06	4.0938e-06	2.6656e-06	5.7939e-06
K00322	0.00011198	7.1681e-05	8.0341e-05	7.6068e-05	0.00018219	0.00016117	0.00010807	0.00014129	0.00012567	8.7009e-05	0.00010922	0.00015591	7.336e-05	0.00014015	0.00010567	0.00016573	0.00015698	0.00014621	0.00011432	0.00011037
K00323	6.4829e-06	5.7466e-06	6.8186e-06	5.3906e-06	4.4437e-06	6.4118e-06	6.7543e-06	7.0644e-06	3.0787e-06	4.3074e-06	6.4073e-06	5.9058e-06	6.9317e-06	6.5051e-06	3.8373e-06	3.3256e-06	5.0259e-06	5.8483e-06	4.7388e-06	4.9248e-06
K00324	0.00031914	0.00010465	0.0002176	0.00024198	0.00029624	0.0002043	0.0002275	0.00030583	0.00025777	0.00022082	0.00026241	0.00026753	0.00020997	0.00027499	0.00023939	0.00037635	0.00022528	0.00032283	0.0002242	0.00030563
K00325	0.00027995	0.00010253	0.00020811	0.00023479	0.00027965	0.00020197	0.00023793	0.00028375	0.0002407	0.00022427	0.00025251	0.0002442	0.00018571	0.00028386	0.00022493	0.00035085	0.00022321	0.00029212	0.00021147	0.00027521
K00326	4.4202e-06	6.3515e-06	6.8186e-06	5.3906e-06	5.3324e-06	4.6631e-06	9.2104e-06	6.1813e-06	3.9184e-06	4.0202e-06	4.9511e-06	4.7246e-06	3.177e-06	4.4353e-06	6.1987e-06	3.3256e-06	5.0259e-06	3.509e-06	4.1465e-06	3.766e-06
K00327	5.3042e-06	4.8392e-06	6.5221e-06	5.0912e-06	5.0362e-06	4.0802e-06	5.2192e-06	6.4757e-06	5.0379e-06	3.4459e-06	4.0774e-06	7.0869e-06	6.354e-06	5.3223e-06	5.6084e-06	4.157e-06	4.7302e-06	3.509e-06	5.3312e-06	4.9248e-06
K00328	5.8936e-06	6.3515e-06	4.1504e-06	5.6901e-06	6.5174e-06	3.7888e-06	3.6841e-06	2.9435e-06	4.7581e-06	5.1688e-06	4.6599e-06	6.7917e-06	4.0435e-06	5.0266e-06	4.7228e-06	5.2655e-06	2.6608e-06	3.8014e-06	5.9235e-06	5.7939e-06
K00329	4.8327e-05	4.9602e-05	3.8243e-05	0.00010122	6.4878e-05	4.6048e-05	6.1095e-05	3.8265e-05	1.4554e-05	3.9915e-05	9.6984e-05	7.6775e-05	6.9317e-05	5.2632e-05	6.612e-05	5.9861e-05	3.5477e-05	6.7255e-05	5.7162e-05	9.2992e-05
K00330	0.00019449	0.00012642	0.00015386	0.00018568	0.00018634	0.00016758	0.00016855	0.00018603	0.00015198	0.00014186	0.00019309	0.00018544	0.00014412	0.00017179	0.00016412	0.00019011	0.0001694	0.00019446	0.00015757	0.00018106
K00331	0.00021541	0.00018873	0.00019685	0.0002321	0.00021981	0.00017574	0.00019618	0.0002134	0.0001906	0.00018005	0.00024872	0.00021881	0.00017011	0.00020077	0.00020338	0.0002206	0.00019483	0.00022838	0.00016823	0.00021872
K00332	0.00016355	0.0001972	0.00018973	0.00021143	0.0001345	0.00010842	0.00013539	0.00016277	0.00017465	0.00019354	0.00021465	0.00016093	0.00017936	0.00015109	0.00018153	0.00014162	0.00016024	0.00015439	0.00015727	0.00022596
K00333	0.00036275	0.0002964	0.00033411	0.00037974	0.00026929	0.00017749	0.00026004	0.00032614	0.00031095	0.00033798	0.00037337	0.00031744	0.00031135	0.00023063	0.00031495	0.00030762	0.00020192	0.00031493	0.00021117	0.00040065
K00334	0.00021305	0.00016453	0.00016157	0.00022701	0.00022515	0.00015884	0.00017101	0.0002137	0.00019536	0.00017115	0.00023183	0.00017983	0.00016954	0.0001783	0.00018773	0.00022753	0.00014605	0.00022282	0.0001626	0.00021669
K00335	0.00050538	0.00033814	0.00038095	0.00049294	0.00049028	0.00035702	0.0004421	0.0004112	0.00043634	0.00042901	0.00050472	0.00046715	0.00039944	0.00037463	0.00048616	0.00053819	0.00034117	0.00051202	0.00036045	0.00051073
K00336	0.00083601	0.00054562	0.0006445	0.00078194	0.00078149	0.00060737	0.0006438	0.00078974	0.00070643	0.00067884	0.00083965	0.00077691	0.00060537	0.00064282	0.00066504	0.00087685	0.00060074	0.00083426	0.00053164	0.00082881
K00337	0.00045145	0.0003829	0.00038095	0.00045012	0.00040437	0.00030398	0.00039543	0.00041709	0.00036665	0.00035895	0.0004724	0.00040071	0.00034254	0.00033678	0.0003737	0.00038826	0.00035654	0.00043716	0.00032609	0.00045163
K00338	0.00019537	0.00015304	0.00017847	0.00019017	0.00019434	0.0001635	0.0001796	0.00017308	0.00014834	0.00015133	0.00021931	0.00017481	0.00015394	0.00016677	0.00018862	0.00021506	0.00018655	0.00018451	0.00016023	0.0002135
K00339	0.0002546	0.00020476	0.00020811	0.00025606	0.00021418	0.00016292	0.00019342	0.00023607	0.00021971	0.00019785	0.0002496	0.00021763	0.00017011	0.00019604	0.00019511	0.00021284	0.00019897	0.00023598	0.00016112	0.00025261
K00340	0.00012377	9.497e-05	0.00011947	0.00012129	0.00010517	9.3263e-05	9.8244e-05	0.00011303	9.5161e-05	9.7059e-05	0.00013252	9.7445e-05	8.1736e-05	0.00011739	0.0001039	0.00010753	0.00011944	0.00011667	0.0001004	0.00012631
K00341	0.00074583	0.00062154	0.00064391	0.00077595	0.00072224	0.00053509	0.00062907	0.00068671	0.00064654	0.00064065	0.00084781	0.00066854	0.0005863	0.00064459	0.00065913	0.00071528	0.00063267	0.00072899	0.00058554	0.00077406
K00342	0.00056402	0.00047273	0.00048857	0.00055284	0.00051547	0.00041269	0.00048477	0.00051511	0.00049288	0.0004784	0.00058103	0.0005392	0.00042572	0.00046866	0.00048704	0.00048831	0.00051116	0.00053132	0.00041435	0.00056925
K00343	0.00059407	0.00049209	0.00052681	0.0006322	0.00057205	0.00041065	0.00049214	0.00054749	0.00050351	0.00050942	0.00061773	0.00057227	0.00046962	0.00050414	0.00053604	0.00054374	0.00049579	0.00057869	0.00044634	0.00062429
K00344	0.00020922	0.00026223	0.00025169	0.00033841	0.00037268	0.00032817	0.0002539	0.0003385	0.00015898	0.00024782	0.00040861	0.00038329	0.00029691	0.00035393	0.00025208	0.00030928	0.00040857	0.00028013	0.00031987	0.00034474
K00346	0.00015235	8.6501e-05	0.00012955	9.3438e-05	9.4798e-05	0.00012241	0.00017592	0.0001248	7.249e-05	0.0001005	8.679e-05	8.0614e-05	5.9786e-05	0.00014577	4.959e-05	8.9514e-05	0.00018951	0.00013012	0.0001164	0.00011037
K00347	0.00013585	6.3817e-05	0.000126	8.7448e-05	7.9097e-05	0.00010958	0.00014522	0.00011362	6.7173e-05	9.1316e-05	7.9801e-05	8.5043e-05	5.2565e-05	0.00012655	5.0771e-05	8.1754e-05	0.00016674	0.00012925	9.8923e-05	8.9805e-05
K00348	8.6341e-05	4.0226e-05	7.0854e-05	5.9297e-05	5.2435e-05	6.5284e-05	9.8244e-05	7.0938e-05	4.4222e-05	6.5185e-05	5.0676e-05	5.4333e-05	3.7258e-05	8.5748e-05	2.8042e-05	6.1801e-05	8.8101e-05	8.1876e-05	6.5159e-05	6.2574e-05
K00349	7.2786e-05	4.1133e-05	7.115e-05	4.3125e-05	5.0954e-05	6.4992e-05	8.9647e-05	6.2402e-05	3.4986e-05	5.1401e-05	4.3978e-05	4.5475e-05	2.8882e-05	7.7469e-05	2.568e-05	3.769e-05	8.6031e-05	7.0764e-05	6.1012e-05	4.5482e-05
K00350	6.866e-05	4.3553e-05	5.7217e-05	4.6419e-05	4.3844e-05	5.2752e-05	7.1841e-05	5.2394e-05	3.9744e-05	4.853e-05	4.456e-05	5.138e-05	2.7727e-05	6.9781e-05	2.568e-05	4.4064e-05	8.5144e-05	6.8717e-05	6.427e-05	5.1276e-05
K00351	0.00013585	7.1379e-05	0.00012688	7.4271e-05	8.7688e-05	0.00012212	0.00016456	0.00010832	7.389e-05	9.6485e-05	7.4267e-05	8.8292e-05	5.4876e-05	0.00013927	4.9295e-05	8.4803e-05	0.00017472	0.00012515	0.00010514	9.9365e-05
K00353	3.8308e-06	5.7466e-06	6.5221e-06	4.7917e-06	4.4437e-06	6.9947e-06	3.0701e-06	6.77e-06	3.3586e-06	4.0202e-06	2.6212e-06	5.0199e-06	4.6211e-06	5.9137e-06	7.9698e-06	4.4341e-06	4.139e-06	6.1407e-06	3.5541e-06	5.5042e-06
K00354	7.9563e-06	6.049e-06	4.1504e-06	3.8932e-06	2.37e-06	4.3717e-06	5.5262e-06	7.0644e-06	5.0379e-06	5.456e-06	4.0774e-06	5.9058e-06	7.7981e-06	6.5051e-06	4.7228e-06	5.5427e-06	3.8433e-06	4.0938e-06	4.7388e-06	3.766e-06
K00355	0.00015412	7.0169e-05	9.9611e-05	0.00012069	0.00018101	0.00020197	0.00010377	0.00021899	8.7324e-05	0.0001476	0.00015028	0.00017865	0.0001112	0.00016765	8.2945e-05	0.00014162	0.00021168	0.00015878	0.00014128	9.415e-05
K00356	2.7995e-05	5.8676e-05	5.3659e-05	4.8815e-05	4.888e-05	2.9145e-05	1.0131e-05	3.5322e-05	1.6513e-05	5.4273e-05	6.5238e-05	3.3663e-05	5.1121e-05	6.8303e-05	4.0144e-05	2.1339e-05	6.1493e-05	2.4563e-05	6.4566e-05	4.8379e-05
K00357	6.7776e-06	4.5368e-06	4.7434e-06	4.1927e-06	3.5549e-06	4.3717e-06	5.5262e-06	4.1209e-06	4.7581e-06	2.2973e-06	6.4073e-06	7.0869e-06	3.7547e-06	5.618e-06	4.7228e-06	5.2655e-06	5.9128e-06	7.6028e-06	4.1465e-06	8.4011e-06
K00358	9.3708e-05	0.00011856	0.00011681	8.056e-05	0.00012028	0.00012998	0.00010316	0.00012421	0.00012511	9.9069e-05	0.00013397	0.00012579	0.00011004	0.00014311	0.00013076	0.00010309	0.00013747	8.5093e-05	0.00012351	0.00010342
K00359	0.00020274	0.00029429	0.00023628	0.00023809	0.00013331	0.00028999	0.00020355	0.00020075	0.00022503	0.00024092	0.00022164	0.00023977	0.00028247	0.00022679	0.0002202	0.00013552	0.00020843	0.00017633	0.00021206	0.00017469
K00360	6.4829e-06	5.7466e-06	4.1504e-06	6.888e-06	7.1099e-06	4.9546e-06	5.5262e-06	3.2378e-06	4.4782e-06	4.3074e-06	5.2424e-06	5.0199e-06	4.9099e-06	5.3223e-06	4.4277e-06	7.2055e-06	4.139e-06	7.8952e-06	6.5159e-06	4.6351e-06
K00362	0.00034949	0.00036808	0.00037828	0.00029948	0.00042304	0.00038383	0.0004599	0.00040149	0.00044502	0.00037015	0.00029328	0.00044736	0.0003229	0.0004314	0.00042978	0.00038466	0.000434	0.00039593	0.00034001	0.00030592
K00363	3.3593e-05	4.8392e-05	4.2987e-05	3.0547e-05	3.4364e-05	4.3717e-05	3.899e-05	4.1797e-05	5.1219e-05	4.0776e-05	3.0872e-05	4.4884e-05	3.0326e-05	4.7309e-05	3.9259e-05	3.963e-05	4.8781e-05	4.4155e-05	4.2057e-05	2.4334e-05
K00364	0.000249	0.00028158	0.00030209	0.00013926	0.00018812	0.00027833	0.00018728	0.00018279	0.00031403	0.00024293	0.00022688	0.00015621	0.00021748	0.0002469	0.00024647	0.00022614	0.00026903	0.0002468	0.00024849	0.00017295
K00365	9.1351e-06	4.3251e-05	3.0239e-05	4.8516e-05	1.9552e-05	3.9345e-05	5.4341e-05	8.5361e-06	9.5161e-06	1.6942e-05	5.4171e-05	5.5219e-05	4.0146e-05	1.5376e-05	3.9259e-05	1.2471e-05	2.8086e-05	3.0119e-05	2.1028e-05	5.6201e-05
K00366	0.00011345	0.00027553	0.00015979	0.00025965	0.00021655	0.00012736	0.00026219	0.00012392	7.1371e-05	0.00019699	0.00022018	0.00028141	0.00027438	0.00012034	0.00023201	0.0001103	0.0001422	8.8017e-05	0.00016379	0.00029694
K00367	5.3042e-06	6.9564e-06	4.4469e-06	6.888e-06	5.6286e-06	6.9947e-06	6.1402e-06	3.8265e-06	4.1983e-06	5.1688e-06	4.0774e-06	7.9728e-06	5.1988e-06	4.4353e-06	5.9036e-06	5.5427e-06	4.139e-06	4.971e-06	4.1465e-06	5.2145e-06
K00368	0.00014557	6.4725e-05	0.00010435	9.5534e-05	0.0001025	0.00011192	0.00011636	0.00018102	0.00011559	0.00014272	9.9896e-05	0.00011487	6.3251e-05	0.00011325	2.6861e-05	9.5334e-05	0.00016556	0.00017369	7.7006e-05	9.6468e-05
K00369	4.7149e-06	4.8392e-06	8.3009e-06	4.4922e-06	6.5174e-06	4.6631e-06	4.2982e-06	5.5926e-06	5.3178e-06	2.8716e-06	6.1161e-06	5.9058e-06	6.354e-06	4.4353e-06	5.6084e-06	6.3741e-06	5.9128e-06	4.6786e-06	4.4426e-06	5.2145e-06
K00370	0.00066686	0.00068868	0.00069698	0.00059267	0.00054154	0.00047943	0.00047863	0.00083242	0.00096169	0.00058982	0.00055016	0.00057759	0.00046933	0.00060172	0.00057294	0.00060138	0.000583	0.00070326	0.00043034	0.00052464
K00371	0.00026138	0.00028068	0.00028964	0.00026055	0.00023255	0.00020255	0.00019065	0.00033409	0.00039576	0.00024609	0.00022164	0.00024332	0.00018369	0.00023714	0.00023998	0.00024914	0.00023296	0.00029212	0.00018333	0.00022451
K00372	0.00017975	1.482e-05	8.6863e-05	6.7084e-05	0.00020944	0.0002591	0.00018482	0.0002502	7.1931e-05	0.00010625	8.912e-05	0.00024627	7.9714e-05	0.00020787	0.0001039	0.00018984	0.00022794	0.00018861	0.00014898	8.9805e-05
K00373	0.00010432	0.00012673	0.00012303	0.00010542	0.00010487	8.6851e-05	8.2893e-05	0.000156	0.00017101	0.00010481	9.4654e-05	0.00011634	8.5491e-05	0.0001097	0.00010007	0.0001078	0.00010052	0.00012428	8.5595e-05	0.00010023
K00374	0.00013349	0.00014457	0.00012481	0.00012698	0.0001102	0.00010055	0.00010009	0.00016395	0.00018864	0.00011831	0.00010892	0.00011251	8.5202e-05	0.00012507	0.00011453	0.00011889	0.00012033	0.00015323	9.0926e-05	0.00011559
K00375	0.00057551	0.00049905	0.00055023	0.00065167	0.00073498	0.00069102	0.00068218	0.00073116	0.00041255	0.0005634	0.00063986	0.00083035	0.00059786	0.0007537	0.00065884	0.0005939	0.00067702	0.00061202	0.00062197	0.00064022
K00376	5.3042e-05	1.0888e-05	2.7867e-05	3.1745e-05	7.2876e-05	0.00010317	3.7762e-05	0.0001039	6.9971e-06	5.1401e-05	3.3784e-05	8.2976e-05	3.2925e-05	7.8948e-05	7.6746e-06	7.4826e-05	0.000115	5.6436e-05	5.3608e-05	3.2735e-05
K00378	0.00030057	0.00040861	0.00019448	0.00044143	0.00040497	0.00015534	0.00044486	0.00024166	0.00019704	0.00029233	0.00024756	0.00041075	0.00038211	0.00012419	0.0004224	0.00028268	0.00016319	0.00020966	0.00018807	0.00038703
K00380	0.00046825	0.0002716	0.00043194	0.00022012	0.00033239	0.00034886	0.00057718	0.00036293	0.00045034	0.00040547	0.00027406	0.00042876	0.00031799	0.00049557	0.00033001	0.00043316	0.00048603	0.00046932	0.00038947	0.00038269
K00381	0.0004432	0.00019448	0.00033204	0.0002884	0.00035816	0.00032758	0.0004464	0.00035704	0.00032159	0.00038106	0.00031746	0.00036852	0.00027669	0.00046363	0.00026241	0.00042235	0.00046268	0.00047722	0.00032846	0.00037573
K00382	0.0014395	0.001332	0.0015039	0.0013734	0.001094	0.001294	0.0014583	0.0013693	0.0015578	0.001501	0.0012812	0.0013105	0.0014239	0.0015506	0.0012964	0.0012224	0.0013727	0.0015185	0.0014317	0.0013474
K00383	0.0005649	0.00048332	0.00046989	0.00054266	0.00037564	0.00056948	0.00043043	0.00049598	0.00061183	0.00062457	0.00042667	0.00046301	0.00059352	0.00046068	0.00048557	0.00056313	0.00046209	0.00058073	0.00053015	0.00042121
K00384	0.0010084	0.0011375	0.0011609	0.0010036	0.00097079	0.0011483	0.0011086	0.00093308	0.0010857	0.0011423	0.0010202	0.0010099	0.0012278	0.00099557	0.0011524	0.00098549	0.00098093	0.00097052	0.0011681	0.0010887
K00385	2.7995e-05	3.7504e-05	1.5119e-05	4.3425e-05	5.1547e-05	1.5738e-05	5.5876e-05	2.6786e-05	1.1475e-05	3.733e-05	2.4464e-05	6.3487e-05	4.9099e-05	1.094e-05	4.2506e-05	3.6027e-05	8.2779e-06	1.696e-05	1.8659e-05	5.1276e-05
K00386	5.3042e-06	5.7466e-06	4.4469e-06	6.888e-06	5.6286e-06	5.5375e-06	4.9122e-06	5.887e-06	7.277e-06	3.733e-06	3.4949e-06	6.7917e-06	4.6211e-06	4.7309e-06	4.1325e-06	4.9884e-06	5.6172e-06	4.6786e-06	3.8503e-06	6.3733e-06
K00387	4.7149e-06	7.8637e-06	2.6681e-06	6.2891e-06	5.6286e-06	6.4118e-06	8.5963e-06	5.2983e-06	5.3178e-06	6.0303e-06	4.9511e-06	5.3152e-06	5.1988e-06	5.618e-06	4.1325e-06	4.4341e-06	3.8433e-06	6.1407e-06	5.6273e-06	5.2145e-06
K00389	8.5457e-06	1.845e-05	1.5416e-05	1.138e-05	1.6293e-05	1.1075e-05	9.5174e-06	8.8304e-06	2.3231e-05	1.0912e-05	2.1552e-05	1.063e-05	1.2997e-05	1.094e-05	1.4169e-05	2.1339e-05	1.3599e-05	1.2866e-05	1.2143e-05	1.6802e-05
K00390	0.00019537	0.00015213	0.00019774	0.00019107	0.00015286	0.00014864	0.00023394	0.00015689	0.00016877	0.00020704	0.00020649	0.00018515	0.00017416	0.00021733	0.00016235	0.00018041	0.00021641	0.00022282	0.00018511	0.00022017
K00391	5.8936e-06	3.9319e-06	4.1504e-06	5.9896e-06	5.9249e-06	4.6631e-06	5.2192e-06	3.5322e-06	5.0379e-06	7.1789e-06	2.9124e-06	3.2482e-06	5.7764e-06	4.7309e-06	5.3132e-06	3.6027e-06	4.7302e-06	6.1407e-06	3.8503e-06	2.6072e-06
K00392	6.4829e-06	7.2588e-06	4.1504e-06	5.6901e-06	6.8136e-06	2.623e-06	4.9122e-06	5.2983e-06	3.6385e-06	4.0202e-06	2.9124e-06	2.6576e-06	5.1988e-06	5.618e-06	5.6084e-06	4.7113e-06	4.7302e-06	5.2635e-06	4.1465e-06	6.0836e-06
K00394	5.4516e-05	7.0471e-05	2.4903e-05	7.8763e-05	7.1099e-05	2.2733e-05	8.8419e-05	3.8265e-05	1.2315e-05	6.6908e-05	3.4075e-05	8.3272e-05	8.5202e-05	1.0053e-05	8.0879e-05	5.4595e-05	9.1648e-06	2.3393e-05	2.5471e-05	8.2852e-05
K00395	7.6617e-06	4.5368e-06	3.854e-06	6.2891e-06	5.9249e-06	6.4118e-06	6.4472e-06	3.5322e-06	6.1575e-06	4.0202e-06	5.8249e-06	5.9058e-06	6.9317e-06	5.9137e-06	5.018e-06	3.3256e-06	4.4346e-06	6.1407e-06	7.9967e-06	4.6351e-06
K00397	5.5989e-06	4.5368e-06	3.5575e-06	4.1927e-06	8.5911e-06	4.3717e-06	4.6052e-06	5.0039e-06	5.8776e-06	4.8817e-06	6.6986e-06	8.2681e-06	6.9317e-06	5.3223e-06	7.9698e-06	6.3741e-06	5.9128e-06	4.6786e-06	6.2197e-06	4.3454e-06
K00399	4.7149e-06	6.9564e-06	7.115e-06	4.7917e-06	5.0362e-06	6.4118e-06	5.8332e-06	6.1813e-06	5.0379e-06	4.8817e-06	5.5336e-06	6.2011e-06	4.6211e-06	5.9137e-06	6.4939e-06	4.9884e-06	6.2084e-06	3.8014e-06	6.2197e-06	5.2145e-06
K00400	3.8308e-06	4.8392e-06	4.7434e-06	3.8932e-06	5.0362e-06	4.3717e-06	4.6052e-06	5.887e-06	5.5977e-06	6.0303e-06	4.0774e-06	4.1341e-06	4.0435e-06	5.9137e-06	6.1987e-06	4.4341e-06	5.3215e-06	5.5559e-06	5.3312e-06	5.5042e-06
K00401	5.8936e-06	6.6539e-06	6.2257e-06	6.2891e-06	4.4437e-06	4.3717e-06	6.7543e-06	5.5926e-06	3.6385e-06	6.6046e-06	4.9511e-06	5.3152e-06	7.7981e-06	3.2525e-06	7.3794e-06	5.8198e-06	7.0954e-06	6.7255e-06	5.9235e-06	5.2145e-06
K00402	7.367e-06	7.2588e-06	4.7434e-06	4.4922e-06	4.7399e-06	3.2059e-06	6.1402e-06	6.1813e-06	6.4374e-06	6.3175e-06	6.1161e-06	4.4293e-06	5.1988e-06	3.5482e-06	4.7228e-06	5.2655e-06	5.3215e-06	5.8483e-06	3.5541e-06	4.3454e-06
K00404	0.0003321	7.9242e-05	0.0001927	0.00016861	0.0003232	0.00037684	0.00022043	0.00039619	0.00011811	0.00028141	0.00022338	0.00027757	0.00018051	0.00032644	0.00013755	0.00037912	0.00044464	0.00031113	0.0002322	0.00024769
K00405	0.00012701	3.9924e-05	7.7672e-05	6.5886e-05	9.391e-05	0.00010201	7.6753e-05	0.00011009	5.0659e-05	0.00010252	8.5625e-05	8.7701e-05	6.1519e-05	9.6984e-05	6.4644e-05	0.00011446	0.00012299	0.00010264	7.0194e-05	9.6178e-05
K00406	0.00017533	4.4158e-05	0.00011147	9.5534e-05	0.00014368	0.00014864	0.00012925	0.00016513	7.5849e-05	0.00014243	0.00013077	0.00012845	0.00010484	0.0001647	8.7668e-05	0.0001757	0.00018566	0.00014475	0.00010899	0.00014716
K00407	2.8584e-05	1.5727e-05	1.6898e-05	2.1563e-05	2.4588e-05	2.419e-05	1.7193e-05	2.3548e-05	1.4274e-05	2.0388e-05	2.1552e-05	2.0966e-05	1.2419e-05	2.2768e-05	2.1253e-05	2.9653e-05	2.1877e-05	2.661e-05	1.3328e-05	1.9409e-05
K00408	3.5362e-06	7.2588e-06	5.0398e-06	6.5886e-06	4.7399e-06	6.7032e-06	7.3683e-06	4.7096e-06	5.0379e-06	2.0101e-06	4.3686e-06	3.5435e-06	5.4876e-06	5.9137e-06	3.247e-06	4.7113e-06	5.0259e-06	4.971e-06	4.4426e-06	5.2145e-06
K00411	8.4573e-05	5.4441e-05	7.7672e-05	8.8646e-05	6.8433e-05	7.869e-05	9.4253e-05	6.6817e-05	3.9464e-05	8.5573e-05	9.844e-05	9.5083e-05	6.9028e-05	7.8061e-05	7.1138e-05	8.9791e-05	9.6674e-05	7.9537e-05	6.664e-05	0.00010081
K00412	0.00018241	0.00011644	0.00017284	0.0001701	0.00015257	0.00017924	0.00019035	0.00013569	9.712e-05	0.0001677	0.0001963	0.0001695	0.00015423	0.0001712	0.00014139	0.0001879	0.00020517	0.00018568	0.00014513	0.00023639
K00413	0.00012465	5.0812e-05	9.3385e-05	7.3672e-05	9.4798e-05	0.00010201	9.3025e-05	0.00010008	6.6893e-05	0.00012175	9.4072e-05	7.9138e-05	7.336e-05	0.00011029	8.6192e-05	0.00012942	0.00012328	0.00011667	7.9375e-05	0.00011791
K00414	7.9563e-06	4.8392e-06	4.1504e-06	4.4922e-06	6.2211e-06	4.6631e-06	6.7543e-06	5.0039e-06	3.9184e-06	2.8716e-06	4.6599e-06	3.8388e-06	2.8882e-06	5.3223e-06	5.3132e-06	5.5427e-06	2.9564e-06	4.0938e-06	4.7388e-06	4.3454e-06
K00415	5.3042e-06	7.5613e-06	5.9292e-06	3.8932e-06	5.0362e-06	4.0802e-06	6.1402e-06	7.0644e-06	5.3178e-06	4.3074e-06	4.9511e-06	5.9058e-06	5.1988e-06	4.7309e-06	4.4277e-06	6.3741e-06	6.5041e-06	5.8483e-06	3.5541e-06	5.2145e-06
K00416	7.367e-06	5.1417e-06	4.7434e-06	5.6901e-06	4.7399e-06	5.8289e-06	2.7631e-06	5.0039e-06	4.7581e-06	4.0202e-06	5.2424e-06	6.4964e-06	3.177e-06	7.3921e-06	2.3614e-06	4.9884e-06	5.9128e-06	7.8952e-06	3.5541e-06	6.0836e-06
K00417	6.4829e-06	6.3515e-06	5.0398e-06	5.0912e-06	4.7399e-06	4.0802e-06	6.4472e-06	5.2983e-06	2.2391e-06	8.3276e-06	4.9511e-06	6.7917e-06	6.354e-06	5.0266e-06	3.8373e-06	3.8799e-06	5.0259e-06	5.8483e-06	5.6273e-06	6.663e-06
K00418	5.8936e-06	6.3515e-06	6.2257e-06	5.0912e-06	4.7399e-06	5.8289e-06	6.4472e-06	6.1813e-06	5.5977e-06	4.5945e-06	4.9511e-06	5.3152e-06	6.354e-06	5.0266e-06	2.6566e-06	5.5427e-06	2.3651e-06	3.509e-06	3.8503e-06	5.7939e-06
K00419	7.9563e-06	3.6294e-06	5.9292e-06	4.4922e-06	4.7399e-06	4.6631e-06	4.6052e-06	4.1209e-06	5.3178e-06	2.8716e-06	6.4073e-06	5.6105e-06	5.1988e-06	6.5051e-06	4.1325e-06	4.7113e-06	7.6866e-06	3.8014e-06	4.4426e-06	3.4763e-06
K00420	6.1883e-06	3.9319e-06	5.9292e-06	3.5938e-06	5.9249e-06	3.2059e-06	4.2982e-06	5.887e-06	3.6385e-06	6.8918e-06	4.3686e-06	6.2011e-06	5.4876e-06	4.4353e-06	6.4939e-06	6.3741e-06	2.9564e-06	5.5559e-06	6.812e-06	4.6351e-06
K00421	7.367e-06	6.6539e-06	3.854e-06	5.6901e-06	5.6286e-06	6.1204e-06	7.6753e-06	6.1813e-06	5.3178e-06	5.1688e-06	3.7862e-06	7.3822e-06	4.0435e-06	5.618e-06	7.0843e-06	5.2655e-06	4.7302e-06	5.5559e-06	5.3312e-06	7.8217e-06
K00422	7.6617e-06	5.1417e-06	4.1504e-06	5.3906e-06	5.3324e-06	3.7888e-06	7.3683e-06	4.4152e-06	3.9184e-06	7.4661e-06	5.8249e-06	5.6105e-06	3.7547e-06	6.5051e-06	4.4277e-06	3.8799e-06	3.8433e-06	4.0938e-06	3.8503e-06	5.5042e-06
K00423	3.2415e-06	7.2588e-06	5.0398e-06	7.1875e-06	6.2211e-06	5.5375e-06	6.7543e-06	6.77e-06	4.7581e-06	5.456e-06	4.0774e-06	3.2482e-06	4.9099e-06	5.3223e-06	5.9036e-06	5.5427e-06	4.139e-06	4.0938e-06	4.7388e-06	4.6351e-06
K00425	0.000648	0.00079545	0.0008289	0.00067084	0.00073735	0.00071054	0.00058639	0.0007397	0.0008307	0.00068142	0.00077791	0.00063517	0.00065158	0.00086251	0.00075241	0.00064406	0.00079202	0.00080238	0.00082663	0.00063906
K00426	0.0004927	0.00063303	0.00064717	0.00051511	0.00056405	0.00051178	0.00044732	0.00058605	0.00056733	0.00052263	0.00057288	0.00048546	0.00051092	0.00065464	0.00055287	0.00048526	0.00060163	0.00059857	0.00065514	0.00047944
K00427	9.3413e-05	7.531e-05	8.3305e-05	7.2474e-05	0.00014042	0.00010201	0.00011574	9.8018e-05	0.00015366	5.7431e-05	0.00012145	0.00013229	7.6826e-05	9.7576e-05	0.0001222	0.00014854	9.9926e-05	0.00013948	0.00010159	9.8496e-05
K00428	0.00013143	0.00010949	0.0001008	0.0001177	0.00017478	0.00015272	5.5262e-05	0.00014276	0.00014666	0.00013008	0.0001762	0.00011575	9.0978e-05	0.0001094	0.00013283	0.00021228	0.00017443	0.00012983	0.0001084	0.00015035
K00429	8.0742e-05	4.8997e-05	6.4628e-05	2.8151e-05	6.2508e-05	8.4519e-05	6.9385e-05	5.0039e-05	6.6613e-05	5.8006e-05	5.5919e-05	6.8212e-05	2.9748e-05	5.204e-05	8.324e-05	7.6212e-05	5.4693e-05	6.2284e-05	3.643e-05	5.678e-05
K00430	6.4829e-06	6.6539e-06	2.9646e-06	5.0912e-06	2.9624e-06	2.9145e-06	8.9033e-06	5.5926e-06	4.1983e-06	5.1688e-06	4.3686e-06	6.4964e-06	3.7547e-06	5.3223e-06	6.7891e-06	6.6512e-06	7.6866e-06	4.971e-06	2.0732e-06	5.5042e-06
K00431	6.7776e-06	5.1417e-06	3.854e-06	5.9896e-06	3.8512e-06	4.3717e-06	3.6841e-06	4.7096e-06	6.7173e-06	5.1688e-06	4.6599e-06	7.0869e-06	6.6429e-06	6.2094e-06	7.0843e-06	4.4341e-06	3.8433e-06	4.6786e-06	2.3694e-06	4.0557e-06
K00432	0.0002879	0.00025618	0.00026563	0.00025246	0.00029387	0.00028533	0.00035859	0.00030995	0.00024938	0.00028371	0.00021173	0.00031242	0.00025618	0.00031195	0.00027599	0.00026799	0.00029002	0.00026844	0.00028433	0.00024653
K00433	7.3375e-05	0.0001358	0.00012985	8.7149e-05	0.00011702	0.00014893	6.8157e-05	0.00014217	6.2974e-05	0.00012348	0.00010951	0.00013052	0.00012506	0.00017623	8.3535e-05	7.9537e-05	0.00016645	9.2988e-05	0.0001395	9.0095e-05
K00434	6.1883e-06	3.6294e-06	5.9292e-06	6.2891e-06	2.9624e-06	7.5776e-06	8.2893e-06	4.7096e-06	5.3178e-06	5.456e-06	3.2037e-06	5.6105e-06	5.1988e-06	5.0266e-06	7.0843e-06	4.9884e-06	4.4346e-06	4.6786e-06	6.5159e-06	4.3454e-06
K00435	6.4829e-06	3.9319e-06	5.6327e-06	5.3906e-06	5.6286e-06	4.9546e-06	7.3683e-06	7.3587e-06	6.1575e-06	4.3074e-06	4.3686e-06	5.3152e-06	5.7764e-06	4.4353e-06	6.7891e-06	3.8799e-06	5.3215e-06	7.0179e-06	6.2197e-06	4.3454e-06
K00436	3.5362e-06	4.2343e-06	7.708e-06	6.2891e-06	5.0362e-06	5.8289e-06	3.3771e-06	7.3587e-06	6.4374e-06	4.5945e-06	4.3686e-06	4.7246e-06	4.6211e-06	5.0266e-06	7.0843e-06	5.5427e-06	5.3215e-06	5.8483e-06	6.2197e-06	3.766e-06
K00437	4.7149e-06	5.7466e-06	3.854e-06	7.1875e-06	3.2587e-06	4.9546e-06	7.6753e-06	5.2983e-06	3.3586e-06	5.7431e-06	5.8249e-06	5.3152e-06	3.4658e-06	6.2094e-06	4.7228e-06	5.2655e-06	5.3215e-06	4.3862e-06	7.4044e-06	2.6072e-06
K00438	7.9563e-06	5.1417e-06	4.4469e-06	6.5886e-06	2.6662e-06	4.9546e-06	7.3683e-06	5.887e-06	5.3178e-06	5.456e-06	4.9511e-06	6.4964e-06	6.354e-06	4.7309e-06	6.1987e-06	6.3741e-06	5.0259e-06	5.5559e-06	3.2579e-06	4.6351e-06
K00440	5.5989e-06	3.327e-06	3.2611e-06	6.5886e-06	4.1474e-06	2.0401e-06	3.6841e-06	2.3548e-06	6.4374e-06	5.1688e-06	4.0774e-06	6.2011e-06	4.9099e-06	4.1396e-06	5.9036e-06	4.4341e-06	4.7302e-06	8.1876e-06	4.4426e-06	4.0557e-06
K00441	6.1883e-06	6.049e-06	7.115e-06	3.8932e-06	7.4061e-06	6.4118e-06	6.7543e-06	7.9474e-06	4.1983e-06	5.456e-06	5.2424e-06	7.0869e-06	6.354e-06	3.8439e-06	7.0843e-06	3.8799e-06	4.7302e-06	4.3862e-06	4.4426e-06	4.0557e-06
K00442	4.4202e-06	3.9319e-06	6.8186e-06	4.4922e-06	7.4061e-06	6.4118e-06	7.6753e-06	3.8265e-06	3.3586e-06	4.5945e-06	4.3686e-06	5.9058e-06	6.354e-06	6.2094e-06	4.1325e-06	3.6027e-06	4.7302e-06	5.8483e-06	5.9235e-06	4.9248e-06
K00443	5.5989e-06	5.4441e-06	3.854e-06	4.7917e-06	6.5174e-06	6.9947e-06	6.1402e-06	6.77e-06	5.8776e-06	5.456e-06	4.9511e-06	5.0199e-06	2.8882e-06	5.9137e-06	7.6746e-06	5.5427e-06	2.3651e-06	5.5559e-06	5.6273e-06	4.3454e-06
K00444	4.7149e-06	5.1417e-06	6.5221e-06	4.7917e-06	3.2587e-06	4.6631e-06	7.6753e-06	5.5926e-06	5.0379e-06	4.5945e-06	5.2424e-06	6.4964e-06	6.0652e-06	4.4353e-06	6.4939e-06	5.5427e-06	7.0954e-06	4.971e-06	4.7388e-06	6.9526e-06
K00445	6.4829e-06	4.5368e-06	5.9292e-06	8.086e-06	8.2949e-06	4.3717e-06	7.6753e-06	6.77e-06	6.1575e-06	4.5945e-06	5.5336e-06	5.0199e-06	5.1988e-06	5.0266e-06	3.247e-06	4.9884e-06	5.0259e-06	6.7255e-06	5.035e-06	6.0836e-06
K00446	3.9487e-05	5.3534e-05	4.2097e-05	9.763e-05	6.1323e-05	5.1877e-05	6.8771e-05	3.4439e-05	1.8472e-05	3.7043e-05	0.00010164	7.9433e-05	6.2096e-05	5.5884e-05	6.4054e-05	4.9607e-05	4.5529e-05	5.9945e-05	5.5385e-05	9.2412e-05
K00448	4.4497e-05	9.6784e-06	2.431e-05	1.8568e-05	4.888e-05	5.9746e-05	4.728e-05	6.0047e-05	2.0432e-05	2.7567e-05	2.3008e-05	5.8763e-05	2.4261e-05	4.8492e-05	2.7452e-05	4.4341e-05	5.5876e-05	5.088e-05	3.8799e-05	2.2017e-05
K00449	4.5381e-05	8.1662e-06	2.935e-05	1.8867e-05	5.6583e-05	7.7816e-05	5.9867e-05	7.4176e-05	2.575e-05	3.0726e-05	2.6212e-05	8.0319e-05	1.9929e-05	6.8599e-05	3.2174e-05	4.9884e-05	6.6519e-05	4.9126e-05	4.9461e-05	2.3755e-05
K00450	2.9468e-05	1.1191e-05	1.8381e-05	1.7969e-05	4.9473e-05	6.6741e-05	2.3947e-05	6.5345e-05	7.8368e-06	2.8141e-05	1.5727e-05	4.7542e-05	1.8484e-05	4.6718e-05	6.7891e-06	4.157e-05	7.4797e-05	2.9826e-05	3.0506e-05	2.0279e-05
K00451	3.7719e-05	6.3817e-05	7.0261e-05	4.7018e-05	8.2652e-05	9.9966e-05	2.978e-05	9.478e-05	2.2671e-05	8.4711e-05	7.0481e-05	8.1795e-05	6.9606e-05	9.521e-05	3.4831e-05	5.2378e-05	0.0001422	4.24e-05	9.8923e-05	5.9097e-05
K00452	1.0608e-05	3.6597e-05	3.2314e-05	1.6771e-05	2.2218e-05	1.3406e-05	7.0613e-06	1.2363e-05	1.3155e-05	2.6993e-05	3.2328e-05	1.7127e-05	2.195e-05	3.1934e-05	1.9187e-05	6.3741e-06	3.252e-05	7.6028e-06	3.791e-05	2.1148e-05
K00453	3.5951e-05	8.6501e-05	7.4708e-05	8.2956e-05	7.5839e-05	9.9966e-05	6.9692e-05	7.6236e-05	2.6869e-05	6.461e-05	9.3198e-05	0.00010365	8.6357e-05	8.5748e-05	5.9036e-05	4.0461e-05	0.00012742	5.0588e-05	8.1448e-05	9.3571e-05
K00454	5.3042e-06	6.3515e-06	5.0398e-06	6.888e-06	5.6286e-06	6.1204e-06	4.2982e-06	3.5322e-06	6.4374e-06	6.0303e-06	3.7862e-06	4.7246e-06	4.0435e-06	7.6878e-06	6.1987e-06	5.5427e-06	5.3215e-06	3.8014e-06	5.6273e-06	3.4763e-06
K00455	2.6521e-05	8.7711e-06	1.8973e-05	1.7669e-05	4.4437e-05	5.9746e-05	2.3947e-05	5.7987e-05	6.4374e-06	2.4408e-05	1.6601e-05	3.8683e-05	1.8773e-05	4.9379e-05	6.4939e-06	3.963e-05	6.0015e-05	3.392e-05	2.9025e-05	1.7092e-05
K00456	6.7776e-06	3.327e-06	3.2611e-06	4.7917e-06	7.4061e-06	4.6631e-06	3.6841e-06	6.77e-06	3.9184e-06	7.4661e-06	2.6212e-06	5.9058e-06	5.7764e-06	4.1396e-06	4.4277e-06	6.3741e-06	5.0259e-06	4.971e-06	7.1082e-06	6.0836e-06
K00457	0.00012111	7.5613e-05	0.00010673	9.3737e-05	0.00019108	0.00023082	0.00010776	0.000229	5.1779e-05	0.00012032	0.00011708	0.00019873	0.00010686	0.00021615	7.5566e-05	0.00015325	0.00027347	0.00011989	0.00017771	9.8496e-05
K00458	4.1255e-06	3.327e-06	6.2257e-06	4.7917e-06	3.5549e-06	3.4973e-06	6.7543e-06	7.0644e-06	5.0379e-06	6.8918e-06	4.0774e-06	5.0199e-06	4.3323e-06	5.618e-06	7.0843e-06	3.3256e-06	7.0954e-06	3.2166e-06	3.5541e-06	3.1866e-06
K00459	0.00023456	0.00015183	0.00025081	0.00010961	0.00021152	0.00026988	0.00025543	0.00023842	0.00017353	0.00023145	0.00018843	0.00022206	0.00017936	0.00028031	0.00020751	0.00022753	0.00031959	0.00020995	0.00021976	0.00020394
K00460	4.7149e-06	7.2588e-06	5.6327e-06	6.2891e-06	7.1099e-06	3.4973e-06	3.9912e-06	5.5926e-06	3.3586e-06	5.1688e-06	4.6599e-06	7.3822e-06	5.4876e-06	7.0964e-06	4.7228e-06	4.7113e-06	5.6172e-06	5.8483e-06	5.9235e-06	5.5042e-06
K00461	4.4202e-06	5.7466e-06	4.4469e-06	3.8932e-06	5.6286e-06	7.2861e-06	5.8332e-06	5.0039e-06	3.9184e-06	6.0303e-06	5.5336e-06	8.2681e-06	5.7764e-06	5.3223e-06	6.4939e-06	7.7597e-06	5.6172e-06	4.6786e-06	3.5541e-06	5.7939e-06
K00462	6.1883e-06	3.327e-06	5.6327e-06	5.6901e-06	6.5174e-06	4.9546e-06	7.3683e-06	6.4757e-06	5.5977e-06	6.0303e-06	6.6986e-06	5.0199e-06	6.354e-06	5.618e-06	3.8373e-06	5.5427e-06	3.5477e-06	4.6786e-06	5.9235e-06	4.6351e-06
K00463	8.251e-06	6.049e-06	6.5221e-06	5.0912e-06	3.8512e-06	4.0802e-06	4.6052e-06	7.0644e-06	3.9184e-06	3.733e-06	3.7862e-06	5.0199e-06	5.1988e-06	5.9137e-06	9.7409e-06	3.6027e-06	5.9128e-06	5.2635e-06	4.1465e-06	5.5042e-06
K00464	5.8936e-06	3.9319e-06	5.0398e-06	5.0912e-06	6.5174e-06	4.9546e-06	6.1402e-06	6.4757e-06	3.9184e-06	4.0202e-06	7.8636e-06	5.6105e-06	6.354e-06	5.3223e-06	5.3132e-06	3.3256e-06	4.7302e-06	4.6786e-06	5.9235e-06	4.6351e-06
K00466	5.8936e-06	5.7466e-06	4.1504e-06	5.9896e-06	6.5174e-06	6.1204e-06	4.9122e-06	4.7096e-06	5.3178e-06	6.0303e-06	5.2424e-06	5.9058e-06	5.4876e-06	4.4353e-06	7.3794e-06	2.2171e-06	4.7302e-06	2.9241e-06	5.3312e-06	5.5042e-06
K00467	5.5989e-06	5.7466e-06	4.7434e-06	3.2943e-06	6.5174e-06	5.5375e-06	5.8332e-06	5.2983e-06	2.2391e-06	4.5945e-06	6.6986e-06	4.1341e-06	5.7764e-06	7.6878e-06	5.3132e-06	3.8799e-06	4.4346e-06	5.5559e-06	3.8503e-06	4.3454e-06
K00468	7.0723e-06	3.6294e-06	4.4469e-06	4.4922e-06	7.1099e-06	2.9145e-06	6.1402e-06	4.7096e-06	4.4782e-06	4.0202e-06	7.5723e-06	6.4964e-06	4.6211e-06	5.0266e-06	6.7891e-06	5.2655e-06	5.3215e-06	6.4331e-06	5.3312e-06	7.8217e-06
K00469	7.9563e-06	4.2343e-06	6.5221e-06	3.5938e-06	7.7024e-06	3.2059e-06	6.1402e-06	4.4152e-06	5.5977e-06	3.1587e-06	6.1161e-06	5.6105e-06	3.7547e-06	3.8439e-06	3.8373e-06	5.2655e-06	5.9128e-06	6.4331e-06	4.1465e-06	4.6351e-06
K00470	4.2139e-05	4.8392e-06	2.6385e-05	2.0964e-05	4.9473e-05	4.6631e-05	5.2499e-05	4.3564e-05	3.3027e-05	2.0101e-05	2.1261e-05	5.4333e-05	1.5885e-05	4.7605e-05	4.3096e-05	3.9907e-05	2.4538e-05	4.6786e-05	3.2579e-05	1.912e-05
K00471	7.0723e-06	5.7466e-06	5.6327e-06	5.3906e-06	7.7024e-06	7.2861e-06	7.9823e-06	7.0644e-06	5.0379e-06	3.4459e-06	4.6599e-06	5.0199e-06	4.6211e-06	5.9137e-06	5.3132e-06	6.3741e-06	6.5041e-06	2.9241e-06	7.1082e-06	6.0836e-06
K00472	1.5029e-05	3.8109e-05	3.6168e-05	1.8867e-05	3.0809e-05	2.1276e-05	3.9912e-06	1.8838e-05	1.6793e-05	3.2449e-05	3.4075e-05	2.3623e-05	3.2348e-05	3.5482e-05	2.3024e-05	7.4826e-06	3.9024e-05	7.6028e-06	4.4426e-05	3.2446e-05
K00473	5.3042e-06	5.4441e-06	3.5575e-06	4.7917e-06	4.1474e-06	4.9546e-06	5.8332e-06	7.0644e-06	3.9184e-06	4.3074e-06	4.6599e-06	5.6105e-06	5.4876e-06	2.6612e-06	6.4939e-06	6.0969e-06	4.7302e-06	4.6786e-06	3.8503e-06	6.0836e-06
K00474	4.4202e-06	4.2343e-06	4.7434e-06	5.6901e-06	5.0362e-06	4.9546e-06	6.4472e-06	7.0644e-06	5.5977e-06	5.1688e-06	5.5336e-06	4.4293e-06	7.7981e-06	4.4353e-06	2.9518e-06	3.8799e-06	5.0259e-06	7.3104e-06	2.6656e-06	4.9248e-06
K00475	5.0096e-06	4.8392e-06	3.2611e-06	6.5886e-06	4.4437e-06	2.3316e-06	6.4472e-06	6.4757e-06	5.5977e-06	4.8817e-06	5.2424e-06	6.4964e-06	4.6211e-06	5.618e-06	6.1987e-06	4.7113e-06	6.5041e-06	5.2635e-06	4.1465e-06	5.2145e-06
K00476	8.5457e-06	3.9319e-06	5.0398e-06	4.1927e-06	5.9249e-06	4.9546e-06	7.6753e-06	5.2983e-06	5.0379e-06	4.5945e-06	4.6599e-06	4.1341e-06	4.6211e-06	3.8439e-06	5.6084e-06	5.5427e-06	3.5477e-06	6.7255e-06	5.3312e-06	7.2423e-06
K00477	7.9563e-06	7.2588e-06	4.1504e-06	8.086e-06	5.0362e-06	6.1204e-06	3.9912e-06	2.3548e-06	5.3178e-06	4.5945e-06	4.3686e-06	5.9058e-06	5.7764e-06	6.2094e-06	5.018e-06	7.2055e-06	3.5477e-06	4.971e-06	5.9235e-06	8.9805e-06
K00478	7.367e-06	6.049e-06	5.6327e-06	4.7917e-06	5.0362e-06	5.8289e-06	7.6753e-06	6.1813e-06	6.7173e-06	6.0303e-06	4.6599e-06	4.7246e-06	5.7764e-06	4.1396e-06	7.3794e-06	4.157e-06	3.252e-06	3.2166e-06	6.5159e-06	5.7939e-06
K00479	7.0134e-05	1.7542e-05	2.3717e-05	7.8164e-05	0.00012087	8.5394e-05	4.3289e-05	0.00011362	1.0076e-05	6.4323e-05	8.1257e-05	7.8842e-05	4.5922e-05	0.00010024	4.2801e-05	9.3117e-05	9.5787e-05	8.1584e-05	7.049e-05	5.7939e-05
K00480	5.098e-05	1.2703e-05	1.2451e-05	6.4388e-05	5.9545e-05	1.3698e-05	1.9649e-05	4.2092e-05	7.8368e-06	3.4459e-05	5.854e-05	1.9194e-05	3.437e-05	4.7901e-05	4.0735e-05	6.1801e-05	1.8921e-05	5.0003e-05	3.9095e-05	4.722e-05
K00481	7.367e-05	1.1191e-05	4.2394e-05	3.2044e-05	9.9538e-05	0.00012532	8.7498e-05	0.00012304	3.4986e-05	5.1688e-05	3.9609e-05	0.00012107	3.1481e-05	0.00010556	5.2246e-05	8.9237e-05	0.00010613	9.211e-05	6.7824e-05	4.0847e-05
K00483	5.982e-05	0.0002102	0.00018469	0.00016142	0.00016975	0.00018769	0.00010991	0.00015571	7.361e-05	0.00016138	0.00023066	0.00022412	0.0002042	0.00021319	0.00012043	7.4272e-05	0.00026785	8.7724e-05	0.00024227	0.00019236
K00484	7.9269e-05	1.0586e-05	4.4469e-05	5.0313e-05	7.3469e-05	5.45e-05	7.7674e-05	7.2115e-05	2.8548e-05	5.9442e-05	5.0385e-05	6.8802e-05	4.7366e-05	8.1609e-05	4.6933e-05	7.7043e-05	7.0954e-05	7.8367e-05	5.7458e-05	6.5181e-05
K00485	2.6521e-06	4.2343e-06	4.7434e-06	5.3906e-06	5.3324e-06	4.6631e-06	4.2982e-06	5.887e-06	5.3178e-06	3.1587e-06	2.0387e-06	5.3152e-06	4.9099e-06	5.0266e-06	6.1987e-06	4.157e-06	4.139e-06	4.6786e-06	4.7388e-06	4.6351e-06
K00486	3.5362e-06	6.3515e-06	6.2257e-06	4.1927e-06	3.5549e-06	4.3717e-06	7.0613e-06	5.2983e-06	5.8776e-06	5.1688e-06	4.9511e-06	5.9058e-06	6.354e-06	5.3223e-06	5.018e-06	4.9884e-06	3.8433e-06	5.2635e-06	5.035e-06	5.2145e-06
K00487	4.7149e-06	6.049e-06	6.2257e-06	2.6953e-06	5.9249e-06	3.4973e-06	5.8332e-06	4.4152e-06	6.7173e-06	5.7431e-06	4.0774e-06	4.7246e-06	5.7764e-06	4.1396e-06	4.1325e-06	4.4341e-06	5.3215e-06	5.8483e-06	4.4426e-06	4.9248e-06
K00488	5.0096e-06	4.5368e-06	4.7434e-06	3.2943e-06	5.3324e-06	6.1204e-06	3.9912e-06	5.2983e-06	5.3178e-06	7.4661e-06	4.9511e-06	7.0869e-06	4.9099e-06	6.8007e-06	3.247e-06	5.8198e-06	5.3215e-06	5.2635e-06	6.5159e-06	4.6351e-06
K00489	7.0723e-06	3.9319e-06	4.7434e-06	4.1927e-06	7.4061e-06	5.246e-06	5.5262e-06	4.4152e-06	6.9971e-06	4.3074e-06	5.5336e-06	6.4964e-06	4.9099e-06	6.8007e-06	5.9036e-06	4.4341e-06	4.7302e-06	4.971e-06	6.812e-06	6.3733e-06
K00490	6.4829e-06	5.7466e-06	4.7434e-06	5.0912e-06	6.5174e-06	5.8289e-06	4.9122e-06	5.0039e-06	5.0379e-06	3.733e-06	2.9124e-06	5.3152e-06	5.4876e-06	5.0266e-06	3.247e-06	4.4341e-06	5.9128e-06	2.9241e-06	3.8503e-06	5.7939e-06
K00491	7.5733e-05	0.00021232	0.00017817	0.00013836	8.68e-05	0.00011075	0.00017438	7.918e-05	0.00014134	0.00014588	0.00013718	0.00014499	0.00015019	0.00015701	0.00016028	4.351e-05	0.00013215	0.00010234	0.00014631	0.00013674
K00492	8.7814e-05	0.00015516	0.00012807	0.00010991	7.4061e-05	4.5174e-05	6.3551e-05	8.9776e-05	9.6841e-05	0.00014674	0.00011213	7.9138e-05	0.00010138	0.00014015	0.00011217	3.8521e-05	0.0001354	9.5912e-05	0.00013506	9.5309e-05
K00493	5.2158e-05	1.2401e-05	1.2451e-05	6.5586e-05	6.5174e-05	1.6321e-05	1.4123e-05	4.1503e-05	7.5569e-06	3.2449e-05	5.7666e-05	1.8899e-05	3.6969e-05	4.7605e-05	3.4831e-05	5.1547e-05	1.5373e-05	4.6201e-05	3.9688e-05	3.8819e-05
K00494	5.8936e-06	3.9319e-06	5.6327e-06	5.0912e-06	3.8512e-06	3.2059e-06	7.3683e-06	6.1813e-06	3.0787e-06	5.1688e-06	5.2424e-06	5.0199e-06	5.7764e-06	6.2094e-06	6.4939e-06	4.9884e-06	7.0954e-06	5.5559e-06	4.4426e-06	4.6351e-06
K00495	6.1883e-06	4.8392e-06	4.1504e-06	3.5938e-06	4.1474e-06	6.7032e-06	4.6052e-06	6.77e-06	4.7581e-06	6.0303e-06	3.2037e-06	6.4964e-06	5.4876e-06	5.9137e-06	5.3132e-06	7.2055e-06	5.0259e-06	4.6786e-06	5.9235e-06	5.7939e-06
K00496	0.00015618	2.5103e-05	5.692e-05	0.0001144	0.00020856	0.00019235	0.0001271	0.00022665	4.2543e-05	0.0001028	0.00010659	0.00017776	8.4047e-05	0.00019219	9.6818e-05	0.00018097	0.00018418	0.00017457	0.00013061	9.3571e-05
K00497	3.5362e-06	5.4441e-06	6.8186e-06	6.5886e-06	3.5549e-06	4.3717e-06	7.0613e-06	6.1813e-06	5.0379e-06	7.4661e-06	6.1161e-06	6.4964e-06	6.6429e-06	8.2792e-06	7.9698e-06	4.7113e-06	4.4346e-06	2.9241e-06	7.4044e-06	6.663e-06
K00498	5.3042e-06	4.8392e-06	4.1504e-06	3.8932e-06	4.4437e-06	4.0802e-06	7.6753e-06	5.887e-06	4.1983e-06	5.456e-06	5.2424e-06	5.6105e-06	5.7764e-06	5.618e-06	5.9036e-06	6.0969e-06	5.0259e-06	6.7255e-06	4.7388e-06	6.3733e-06
K00499	6.1883e-06	4.8392e-06	5.0398e-06	4.1927e-06	5.9249e-06	9.6177e-06	7.0613e-06	5.887e-06	5.0379e-06	7.1789e-06	4.9511e-06	7.6775e-06	4.9099e-06	5.3223e-06	3.8373e-06	4.7113e-06	6.2084e-06	5.2635e-06	4.7388e-06	6.3733e-06
K00500	2.9763e-05	8.9526e-05	9.2199e-05	5.8099e-05	8.3245e-05	8.7434e-05	2.0877e-05	9.8901e-05	3.5825e-05	8.6434e-05	8.9412e-05	8.652e-05	8.2314e-05	0.00012744	5.874e-05	3.7136e-05	0.00013954	3.2458e-05	0.00011225	7.7058e-05
K00501	5.5989e-06	5.4441e-06	4.4469e-06	4.1927e-06	3.8512e-06	4.9546e-06	4.9122e-06	2.9435e-06	4.7581e-06	3.733e-06	3.7862e-06	5.0199e-06	3.177e-06	7.0964e-06	6.1987e-06	2.7713e-06	4.139e-06	4.6786e-06	6.2197e-06	6.9526e-06
K00502	5.0096e-06	4.8392e-06	4.7434e-06	6.2891e-06	4.1474e-06	6.1204e-06	6.1402e-06	3.8265e-06	6.1575e-06	3.733e-06	6.9898e-06	5.6105e-06	3.4658e-06	5.3223e-06	6.7891e-06	3.6027e-06	3.8433e-06	4.6786e-06	6.812e-06	3.766e-06
K00503	5.3042e-06	5.1417e-06	9.1903e-06	2.3958e-06	4.4437e-06	4.9546e-06	6.1402e-06	3.8265e-06	4.7581e-06	3.4459e-06	4.3686e-06	5.3152e-06	5.1988e-06	5.3223e-06	4.7228e-06	6.3741e-06	5.0259e-06	7.6028e-06	5.9235e-06	5.2145e-06
K00504	5.8936e-06	4.2343e-06	5.3363e-06	4.7917e-06	4.1474e-06	5.246e-06	7.0613e-06	5.2983e-06	6.9971e-06	3.733e-06	6.1161e-06	4.4293e-06	7.7981e-06	5.9137e-06	5.3132e-06	5.5427e-06	3.8433e-06	5.8483e-06	4.1465e-06	4.3454e-06
K00505	8.251e-06	4.7787e-05	3.8243e-05	2.6055e-05	3.6142e-05	1.6321e-05	6.4472e-06	2.237e-05	1.5953e-05	4.0202e-05	3.5823e-05	2.3623e-05	4.2456e-05	4.0213e-05	2.6861e-05	7.4826e-06	4.1094e-05	9.3573e-06	5.1238e-05	2.9838e-05
K00506	3.5362e-06	4.5368e-06	5.3363e-06	6.2891e-06	9.4798e-06	6.1204e-06	5.8332e-06	5.887e-06	6.7173e-06	5.1688e-06	4.3686e-06	5.0199e-06	4.0435e-06	4.7309e-06	8.265e-06	3.3256e-06	5.3215e-06	4.3862e-06	6.5159e-06	4.9248e-06
K00507	5.1274e-05	9.6784e-06	3.7947e-05	2.0365e-05	5.7768e-05	6.1786e-05	7.5218e-05	4.0914e-05	3.5546e-05	2.6131e-05	3.291e-05	7.6185e-05	1.8773e-05	5.8841e-05	5.4313e-05	5.1824e-05	3.6659e-05	5.9652e-05	5.2719e-05	2.6942e-05
K00508	4.0371e-05	8.1662e-06	2.9053e-05	1.9766e-05	4.651e-05	4.1968e-05	4.5745e-05	4.2386e-05	2.435e-05	2.1537e-05	1.864e-05	5.6991e-05	1.8773e-05	4.317e-05	3.7488e-05	3.8521e-05	2.1286e-05	4.4739e-05	3.0802e-05	1.883e-05
K00509	7.6617e-06	6.9564e-06	2.9646e-06	6.5886e-06	5.3324e-06	6.7032e-06	7.0613e-06	3.2378e-06	8.1167e-06	5.7431e-06	5.2424e-06	5.6105e-06	5.7764e-06	4.4353e-06	6.7891e-06	4.4341e-06	3.252e-06	5.2635e-06	6.2197e-06	3.4763e-06
K00510	9.7244e-06	2.1474e-05	2.7867e-05	9.2839e-06	1.896e-05	1.603e-05	3.285e-05	1.148e-05	2.0991e-05	1.6942e-05	1.2232e-05	9.7445e-06	1.8484e-05	2.4246e-05	2.8632e-05	1.164e-05	1.626e-05	8.1876e-06	1.8363e-05	1.0719e-05
K00511	6.1883e-06	4.5368e-06	5.6327e-06	4.7917e-06	5.6286e-06	4.3717e-06	5.2192e-06	4.7096e-06	6.9971e-06	6.3175e-06	6.6986e-06	7.6775e-06	5.7764e-06	5.0266e-06	4.1325e-06	4.7113e-06	7.9823e-06	4.6786e-06	5.3312e-06	5.7939e-06
K00512	6.4829e-06	5.7466e-06	4.7434e-06	4.1927e-06	5.0362e-06	5.8289e-06	4.6052e-06	4.4152e-06	5.8776e-06	6.0303e-06	3.2037e-06	3.5435e-06	6.9317e-06	7.6878e-06	5.3132e-06	5.8198e-06	5.0259e-06	5.8483e-06	5.3312e-06	7.532e-06
K00513	5.5989e-06	5.1417e-06	6.5221e-06	6.888e-06	3.8512e-06	6.7032e-06	6.4472e-06	4.7096e-06	3.6385e-06	4.3074e-06	3.7862e-06	6.2011e-06	3.7547e-06	4.1396e-06	6.7891e-06	7.7597e-06	4.4346e-06	4.0938e-06	5.3312e-06	4.6351e-06
K00514	3.2415e-06	5.7466e-06	5.6327e-06	5.6901e-06	6.5174e-06	4.6631e-06	4.9122e-06	5.2983e-06	5.8776e-06	3.1587e-06	5.5336e-06	4.4293e-06	3.7547e-06	5.618e-06	5.6084e-06	3.0485e-06	4.139e-06	7.0179e-06	5.9235e-06	6.9526e-06
K00515	3.2415e-06	4.2343e-06	2.9646e-06	4.1927e-06	4.1474e-06	6.9947e-06	5.5262e-06	4.1209e-06	5.3178e-06	8.0404e-06	6.1161e-06	5.9058e-06	6.0652e-06	4.1396e-06	5.9036e-06	4.157e-06	2.6608e-06	6.1407e-06	3.2579e-06	4.6351e-06
K00517	0.00015382	0.00029308	0.00026059	0.00023689	0.00033565	0.00024656	7.0306e-05	0.00030024	0.00016261	0.00029089	0.00034192	0.0002569	0.00028622	0.00038025	0.00020397	0.00020757	0.00045469	0.00015937	0.0003714	0.00028071
K00518	1.8565e-05	3.6294e-05	3.6465e-05	9.8828e-06	2.5181e-05	2.7396e-05	4.1447e-05	1.9133e-05	3.2467e-05	2.2973e-05	1.4271e-05	1.6241e-05	2.9748e-05	3.4299e-05	4.0144e-05	1.6074e-05	2.099e-05	1.1404e-05	2.6656e-05	2.4914e-05
K00519	5.8936e-06	4.2343e-06	3.5575e-06	7.487e-06	6.2211e-06	4.0802e-06	6.4472e-06	3.8265e-06	4.1983e-06	4.3074e-06	4.3686e-06	6.2011e-06	4.0435e-06	5.3223e-06	5.9036e-06	4.157e-06	4.139e-06	7.0179e-06	6.2197e-06	5.5042e-06
K00520	0.0001385	0.00024982	0.00015979	0.00017879	9.1243e-05	0.00019847	0.00010101	0.00018485	0.00012371	0.00015679	0.00014504	8.9177e-05	0.00017243	0.00028918	0.00011158	0.00015409	9.4013e-05	0.00025615	0.00010899	6.8947e-05
K00521	4.1255e-06	4.8392e-06	4.7434e-06	3.8932e-06	5.3324e-06	4.6631e-06	8.2893e-06	4.7096e-06	4.7581e-06	3.1587e-06	4.0774e-06	5.3152e-06	5.7764e-06	5.618e-06	6.1987e-06	4.157e-06	6.2084e-06	4.0938e-06	4.7388e-06	2.6072e-06
K00522	3.2415e-06	5.4441e-06	4.4469e-06	4.1927e-06	3.8512e-06	2.9145e-06	6.1402e-06	5.0039e-06	4.1983e-06	4.5945e-06	4.6599e-06	5.6105e-06	5.7764e-06	4.7309e-06	6.1987e-06	4.157e-06	4.4346e-06	5.2635e-06	7.1082e-06	7.2423e-06
K00523	8.4868e-05	1.0283e-05	5.4252e-05	3.474e-05	5.2139e-05	5.9455e-05	8.7805e-05	5.5337e-05	3.2467e-05	6.7769e-05	3.2328e-05	5.8467e-05	5.0255e-05	7.2147e-05	1.9187e-05	6.2355e-05	9.1057e-05	6.4331e-05	4.8869e-05	7.1554e-05
K00524	5.8936e-06	5.1417e-06	6.8186e-06	4.7917e-06	6.2211e-06	5.246e-06	4.9122e-06	2.0604e-06	3.9184e-06	5.7431e-06	4.6599e-06	6.2011e-06	5.4876e-06	6.2094e-06	3.247e-06	7.4826e-06	2.6608e-06	4.971e-06	5.3312e-06	5.7939e-06
K00525	0.0018842	0.0018316	0.0019145	0.0019793	0.0018012	0.0018387	0.0019311	0.0018576	0.0017787	0.0016509	0.0019132	0.0018343	0.0017731	0.0017797	0.001857	0.0018665	0.0016837	0.0019729	0.0016639	0.0018769
K00526	0.00063444	0.00067689	0.00068838	0.00056692	0.00048821	0.00066362	0.00061955	0.00059311	0.00071315	0.0006217	0.00058598	0.00058202	0.00059092	0.00059285	0.00059596	0.00058835	0.00059335	0.00063425	0.0005574	0.00055853
K00527	0.0010016	0.0010622	0.0010539	0.00088975	0.00081319	0.0010192	0.00090998	0.00099637	0.0010728	0.00089191	0.00078519	0.00076834	0.00086617	0.00092608	0.00093571	0.00079981	0.00090022	0.00094128	0.00096346	0.00075204
K00528	0.00037925	0.00025708	0.00027363	0.00035698	0.00036823	0.00029931	0.00043933	0.00033409	0.00029164	0.00032908	0.00034774	0.00040277	0.00030557	0.00029864	0.00029636	0.00032757	0.00028973	0.00038423	0.00027219	0.00038674
K00529	0.00010284	5.5954e-05	5.6624e-05	0.00010542	0.00013035	7.1696e-05	6.8157e-05	8.4184e-05	0.00010804	6.662e-05	0.00013776	8.1205e-05	7.827e-05	9.935e-05	0.00010626	0.00014771	7.0362e-05	0.00011082	8.6483e-05	9.6758e-05
K00530	4.7149e-06	4.2343e-06	4.4469e-06	5.6901e-06	5.6286e-06	4.9546e-06	8.9033e-06	3.5322e-06	6.1575e-06	2.8716e-06	5.2424e-06	2.3623e-06	4.3323e-06	5.3223e-06	3.247e-06	7.2055e-06	5.9128e-06	5.2635e-06	5.035e-06	4.6351e-06
K00531	5.3042e-06	4.8392e-06	4.4469e-06	5.9896e-06	4.4437e-06	4.3717e-06	6.1402e-06	5.2983e-06	3.9184e-06	5.456e-06	4.9511e-06	2.9529e-06	4.6211e-06	3.8439e-06	3.8373e-06	4.9884e-06	3.252e-06	4.971e-06	5.035e-06	5.2145e-06
K00532	4.7443e-05	5.8978e-05	1.8677e-05	6.9779e-05	6.7248e-05	1.807e-05	6.785e-05	3.2673e-05	1.0356e-05	4.8817e-05	3.1163e-05	7.5299e-05	7.3938e-05	1.4193e-05	6.5825e-05	4.545e-05	9.7561e-06	1.9007e-05	2.6656e-05	5.9677e-05
K00533	5.3042e-06	4.5368e-06	7.115e-06	4.4922e-06	3.2587e-06	6.4118e-06	5.5262e-06	5.887e-06	3.9184e-06	5.7431e-06	7.2811e-06	4.4293e-06	7.5093e-06	4.1396e-06	9.7409e-06	3.0485e-06	5.0259e-06	6.4331e-06	4.7388e-06	4.0557e-06
K00534	4.7149e-05	1.0888e-05	1.1265e-05	5.0013e-05	5.0658e-05	1.4864e-05	1.5965e-05	3.385e-05	6.1575e-06	2.6131e-05	4.8346e-05	1.5946e-05	3.0615e-05	3.8439e-05	3.247e-05	4.545e-05	1.2121e-05	4.0353e-05	3.0802e-05	4.1716e-05
K00535	6.7776e-06	6.6539e-06	4.4469e-06	3.2943e-06	5.9249e-06	4.6631e-06	6.1402e-06	3.8265e-06	5.3178e-06	3.733e-06	4.9511e-06	6.4964e-06	4.6211e-06	7.9835e-06	6.1987e-06	5.5427e-06	3.8433e-06	4.0938e-06	5.035e-06	5.5042e-06
K00536	6.4829e-06	4.8392e-06	5.9292e-06	4.7917e-06	6.5174e-06	7.2861e-06	6.4472e-06	6.4757e-06	5.0379e-06	2.8716e-06	5.5336e-06	5.0199e-06	4.3323e-06	6.2094e-06	5.6084e-06	6.0969e-06	5.3215e-06	6.4331e-06	5.9235e-06	5.5042e-06
K00537	0.00019567	0.00025708	0.00024369	0.00019556	0.00018575	0.00021917	0.00022013	0.00018485	0.00022979	0.00022082	0.00019222	0.00020109	0.00023597	0.00024571	0.00022079	0.0001951	0.00020665	0.00019796	0.00023279	0.00017961
K00538	6.4829e-06	5.1417e-06	2.9646e-06	6.888e-06	4.7399e-06	4.3717e-06	4.6052e-06	5.2983e-06	5.3178e-06	4.3074e-06	5.2424e-06	6.7917e-06	2.8882e-06	5.618e-06	7.6746e-06	3.6027e-06	5.0259e-06	4.0938e-06	2.9618e-06	2.6072e-06
K00539	4.7149e-06	5.1417e-06	3.854e-06	6.2891e-06	6.5174e-06	4.3717e-06	5.8332e-06	4.4152e-06	4.4782e-06	4.8817e-06	5.5336e-06	4.7246e-06	5.1988e-06	3.5482e-06	5.9036e-06	5.2655e-06	4.7302e-06	6.1407e-06	4.1465e-06	5.5042e-06
K00540	0.0010043	0.0011094	0.00097624	0.0010473	0.00095717	0.00098683	0.00086608	0.00098989	0.0011593	0.0011334	0.0010252	0.00089414	0.0010213	0.0010021	0.00094634	0.0012008	0.0010392	0.0010413	0.0010399	0.0010562
K00541	3.5362e-06	3.6294e-06	6.2257e-06	5.3906e-06	6.2211e-06	5.246e-06	6.7543e-06	4.4152e-06	5.0379e-06	2.5844e-06	5.8249e-06	5.9058e-06	2.8882e-06	4.4353e-06	4.7228e-06	3.3256e-06	4.7302e-06	5.5559e-06	5.6273e-06	4.9248e-06
K00542	8.251e-06	4.8392e-06	4.1504e-06	5.3906e-06	5.6286e-06	4.6631e-06	5.2192e-06	3.8265e-06	6.4374e-06	3.733e-06	5.5336e-06	5.9058e-06	5.7764e-06	3.2525e-06	4.4277e-06	4.9884e-06	7.0954e-06	6.1407e-06	5.3312e-06	5.7939e-06
K00543	4.7149e-06	6.3515e-06	4.7434e-06	5.0912e-06	6.5174e-06	4.0802e-06	7.6753e-06	5.5926e-06	5.0379e-06	5.1688e-06	4.9511e-06	2.9529e-06	4.6211e-06	6.2094e-06	7.3794e-06	3.8799e-06	5.9128e-06	7.6028e-06	4.4426e-06	4.9248e-06
K00544	6.7776e-06	4.2343e-06	4.4469e-06	5.6901e-06	5.9249e-06	4.3717e-06	8.5963e-06	2.3548e-06	4.7581e-06	4.8817e-06	4.9511e-06	5.3152e-06	7.5093e-06	4.1396e-06	2.6566e-06	6.0969e-06	3.5477e-06	4.0938e-06	4.4426e-06	6.0836e-06
K00545	5.0096e-06	5.1417e-06	4.4469e-06	8.086e-06	5.9249e-06	4.0802e-06	4.2982e-06	4.4152e-06	4.1983e-06	5.1688e-06	3.7862e-06	3.8388e-06	5.7764e-06	5.0266e-06	4.7228e-06	3.3256e-06	4.139e-06	3.8014e-06	5.3312e-06	5.2145e-06
K00546	2.6521e-06	6.3515e-06	5.6327e-06	4.1927e-06	6.2211e-06	4.6631e-06	3.9912e-06	6.77e-06	3.9184e-06	4.5945e-06	4.9511e-06	6.4964e-06	4.9099e-06	4.4353e-06	8.265e-06	4.9884e-06	2.6608e-06	5.2635e-06	6.5159e-06	4.9248e-06
K00547	0.00033269	0.00050298	0.00033707	0.0004043	0.00023907	0.00036926	0.00036473	0.00029611	0.00037001	0.0004494	0.00023853	0.00035051	0.00053201	0.00032851	0.00038373	0.00028905	0.0002303	0.00029358	0.00033705	0.00029375
K00548	0.00085339	0.00096966	0.0008037	0.0011779	0.0012552	0.00085219	0.00098704	0.00089364	0.00058552	0.00082299	0.0011775	0.0011599	0.00097997	0.00098522	0.0010125	0.00088738	0.00099394	0.00085736	0.00099722	0.0011301
K00549	0.00076852	0.00087106	0.00082831	0.00071815	0.00062004	0.00079885	0.00072731	0.00081593	0.00095413	0.00093441	0.00065559	0.00070958	0.00083411	0.00075577	0.0006429	0.00069283	0.00072077	0.00077431	0.00071141	0.00067528
K00550	3.8308e-06	4.8392e-06	4.7434e-06	6.2891e-06	5.3324e-06	6.4118e-06	6.7543e-06	5.0039e-06	4.4782e-06	4.3074e-06	5.2424e-06	5.6105e-06	5.7764e-06	5.0266e-06	6.1987e-06	4.7113e-06	5.3215e-06	4.971e-06	7.4044e-06	3.766e-06
K00551	2.6521e-05	9.0735e-06	9.1903e-06	3.3242e-05	3.9104e-05	1.1075e-05	1.1666e-05	2.1193e-05	6.1575e-06	2.1824e-05	3.1163e-05	1.1221e-05	2.0795e-05	2.809e-05	1.7711e-05	2.993e-05	1.0643e-05	2.8072e-05	2.3102e-05	2.4914e-05
K00552	5.3042e-06	6.3515e-06	4.7434e-06	6.888e-06	6.8136e-06	4.0802e-06	5.2192e-06	5.5926e-06	5.0379e-06	6.3175e-06	5.5336e-06	5.9058e-06	4.0435e-06	5.0266e-06	6.7891e-06	4.157e-06	5.3215e-06	4.6786e-06	4.1465e-06	5.2145e-06
K00553	5.3042e-06	6.049e-06	4.1504e-06	4.7917e-06	3.8512e-06	5.246e-06	6.7543e-06	5.0039e-06	7.277e-06	5.7431e-06	4.0774e-06	6.2011e-06	4.6211e-06	2.9568e-06	6.7891e-06	4.9884e-06	3.252e-06	7.6028e-06	5.6273e-06	5.5042e-06
K00554	0.00043996	0.00041103	0.00042423	0.00042047	0.00034898	0.00041356	0.00039881	0.0004165	0.00045537	0.00040403	0.00042085	0.00037325	0.00038471	0.00035305	0.00038432	0.00036388	0.00036009	0.00045412	0.00036874	0.00038703
K00555	4.4202e-06	5.1417e-06	6.5221e-06	5.0912e-06	3.8512e-06	5.246e-06	7.0613e-06	4.7096e-06	6.1575e-06	5.456e-06	4.3686e-06	7.0869e-06	3.4658e-06	5.3223e-06	7.6746e-06	4.4341e-06	4.7302e-06	5.2635e-06	5.6273e-06	5.5042e-06
K00556	1.9154e-05	6.8959e-05	4.4765e-05	6.4987e-05	4.6214e-05	4.2551e-05	5.2806e-05	1.9427e-05	5.2339e-05	2.5844e-05	8.1548e-05	6.0534e-05	5.3432e-05	2.395e-05	4.5753e-05	3.6582e-05	5.0554e-05	4.123e-05	3.643e-05	7.0975e-05
K00557	0.00012612	5.5651e-05	9.9611e-05	7.8464e-05	0.00013746	0.00014456	0.00016026	0.00011067	0.00012623	0.00010912	0.0001063	0.0001379	8.7801e-05	0.00013217	9.8294e-05	0.00014937	0.00015728	0.00015293	0.00011344	0.00013268
K00558	0.00070664	0.00066781	0.00085351	0.00045431	0.00052465	0.00068111	0.00058271	0.0004842	0.0007403	0.00080347	0.0007249	0.00044677	0.00063771	0.00070964	0.00066002	0.00071639	0.00070806	0.00068454	0.00064626	0.00068657
K00559	5.0096e-06	4.5368e-06	5.9292e-06	7.487e-06	4.1474e-06	4.9546e-06	5.2192e-06	7.3587e-06	3.3586e-06	4.8817e-06	4.3686e-06	5.9058e-06	4.9099e-06	4.4353e-06	3.8373e-06	5.5427e-06	5.6172e-06	5.8483e-06	4.1465e-06	6.3733e-06
K00560	0.0004818	0.00047092	0.00051999	0.00044413	0.00041741	0.00047389	0.00052131	0.00046095	0.00050715	0.00045199	0.00043745	0.00042846	0.00048464	0.00048581	0.0004714	0.00043815	0.00043075	0.00050061	0.00047625	0.00039833
K00561	3.3888e-05	6.6539e-06	3.8836e-05	1.3177e-05	9.4798e-06	8.7434e-06	5.1885e-05	8.5361e-06	2.1271e-05	4.5371e-05	1.4562e-05	1.2402e-05	2.5705e-05	3.4891e-05	1.8891e-05	2.7159e-05	2.1877e-05	3.3043e-05	2.2509e-05	4.6061e-05
K00562	5.0096e-06	5.1417e-06	6.5221e-06	5.0912e-06	5.6286e-06	7.2861e-06	4.9122e-06	5.2983e-06	4.1983e-06	4.8817e-06	7.2811e-06	6.4964e-06	6.6429e-06	7.3921e-06	5.3132e-06	3.6027e-06	6.5041e-06	5.8483e-06	2.0732e-06	5.2145e-06
K00563	0.00019095	0.00020174	0.00017639	0.00019915	0.00020471	0.00026201	0.00020079	0.00025432	0.0002477	0.0002191	0.00015698	0.00022117	0.00023654	0.00018303	0.00024175	0.0002824	0.000149	0.00022896	0.00018659	0.00020076
K00564	0.00028761	0.00021958	0.00024754	0.00030367	0.00032794	0.00036955	0.00023241	0.00035145	0.00027429	0.00027912	0.00031134	0.00032807	0.00030586	0.0003152	0.00026182	0.00034004	0.00032846	0.00028393	0.00030151	0.00029259
K00565	4.7149e-06	5.4441e-06	4.4469e-06	4.4922e-06	5.3324e-06	3.7888e-06	6.4472e-06	4.4152e-06	3.6385e-06	6.6046e-06	5.8249e-06	6.2011e-06	5.4876e-06	4.7309e-06	6.1987e-06	3.0485e-06	5.6172e-06	7.3104e-06	5.9235e-06	4.9248e-06
K00566	0.00081508	0.00079908	0.00081704	0.00065227	0.00062833	0.00073881	0.00079792	0.00066464	0.00076885	0.00069951	0.0006917	0.00061538	0.00061316	0.00070314	0.00072378	0.00062909	0.00070303	0.00073601	0.00069957	0.00066195
K00567	0.00035126	0.00028098	0.00032433	0.00028211	0.00024292	0.00028562	0.0003067	0.00028787	0.00028604	0.00030238	0.00026212	0.00026606	0.0002608	0.00028445	0.00026389	0.00026051	0.00028234	0.00029358	0.00028285	0.00025087
K00568	0.00012406	7.652e-05	9.9907e-05	0.00013357	0.00012235	0.00012153	0.00014153	0.00010979	9.5721e-05	0.00010453	0.00014883	0.00014322	9.1267e-05	0.00012537	0.0001039	0.00014466	0.00013215	0.00014972	0.00011669	0.00014861
K00569	1.9744e-05	6.049e-06	1.008e-05	1.0781e-05	2.7255e-05	4.0511e-05	1.5658e-05	3.5322e-05	4.4782e-06	2.0675e-05	1.1067e-05	2.9824e-05	1.473e-05	3.2821e-05	9.1505e-06	2.7436e-05	4.4937e-05	1.696e-05	2.3102e-05	1.1877e-05
K00570	5.8936e-06	3.9319e-06	6.2257e-06	5.3906e-06	3.2587e-06	4.6631e-06	4.6052e-06	5.5926e-06	5.3178e-06	6.0303e-06	5.5336e-06	6.7917e-06	4.9099e-06	4.1396e-06	5.3132e-06	4.9884e-06	5.6172e-06	3.509e-06	6.812e-06	4.0557e-06
K00571	0.00066362	0.00059643	0.00066763	0.0002881	0.00035816	0.00065051	0.00046942	0.00033497	0.00062387	0.00067223	0.00049074	0.0003951	0.00041763	0.00038823	0.00063375	0.00055731	0.00059217	0.0004395	0.00038562	0.00047104
K00572	3.8308e-06	5.4441e-06	4.7434e-06	2.6953e-06	5.0362e-06	6.7032e-06	7.6753e-06	4.1209e-06	4.7581e-06	8.6147e-06	4.3686e-06	5.3152e-06	7.2205e-06	4.1396e-06	7.6746e-06	4.157e-06	5.9128e-06	4.971e-06	4.7388e-06	3.4763e-06
K00573	0.00014174	6.7144e-05	9.9611e-05	0.0001174	0.00014516	8.6851e-05	7.6753e-05	0.00010067	8.9004e-05	0.00011687	0.0001564	9.0359e-05	8.5491e-05	0.00010763	9.6523e-05	0.00016074	0.00012772	0.0001234	9.8034e-05	0.00014253
K00574	0.00030765	0.0003696	0.00033263	0.00035249	0.00039963	0.00039403	0.00036135	0.00026727	0.00026393	0.00029979	0.00039638	0.00037029	0.00038413	0.00029184	0.0003737	0.00037413	0.0003119	0.00036142	0.00031809	0.00035516
K00575	0.00022808	0.00027251	0.00017965	0.00035069	0.00037653	0.00020518	0.00019403	0.00029111	0.00012203	0.00031013	0.00029736	0.00030828	0.00033503	0.00025754	0.00026241	0.0003187	0.00026342	0.00021522	0.00027959	0.00033633
K00577	5.0096e-06	5.4441e-06	5.6327e-06	6.2891e-06	5.0362e-06	4.9546e-06	7.3683e-06	3.8265e-06	3.6385e-06	6.8918e-06	4.0774e-06	5.9058e-06	6.0652e-06	5.9137e-06	7.3794e-06	3.8799e-06	4.7302e-06	3.2166e-06	3.8503e-06	7.2423e-06
K00578	4.7149e-06	6.9564e-06	6.2257e-06	3.8932e-06	6.8136e-06	4.0802e-06	5.5262e-06	2.9435e-06	4.4782e-06	4.3074e-06	7.8636e-06	5.3152e-06	5.4876e-06	3.2525e-06	6.1987e-06	2.2171e-06	5.0259e-06	5.5559e-06	4.7388e-06	2.8969e-06
K00579	6.4829e-06	5.1417e-06	5.3363e-06	6.5886e-06	5.6286e-06	7.869e-06	8.9033e-06	5.887e-06	5.3178e-06	6.0303e-06	4.6599e-06	5.6105e-06	5.4876e-06	5.618e-06	5.018e-06	3.8799e-06	4.139e-06	5.8483e-06	3.2579e-06	4.0557e-06
K00580	2.3574e-06	5.4441e-06	4.7434e-06	5.0912e-06	5.6286e-06	5.5375e-06	6.7543e-06	3.5322e-06	4.4782e-06	5.456e-06	3.4949e-06	5.0199e-06	6.6429e-06	3.8439e-06	6.1987e-06	4.9884e-06	6.7997e-06	6.4331e-06	9.1814e-06	6.3733e-06
K00581	4.7149e-06	3.0245e-06	3.5575e-06	3.2943e-06	4.1474e-06	5.8289e-06	6.4472e-06	5.2983e-06	6.7173e-06	5.1688e-06	5.8249e-06	5.0199e-06	6.354e-06	6.2094e-06	5.3132e-06	4.157e-06	4.139e-06	5.2635e-06	5.035e-06	3.766e-06
K00582	5.3042e-06	5.1417e-06	4.7434e-06	5.0912e-06	6.5174e-06	4.6631e-06	3.9912e-06	5.2983e-06	5.0379e-06	4.3074e-06	3.7862e-06	4.1341e-06	4.0435e-06	6.5051e-06	7.0843e-06	3.6027e-06	5.3215e-06	5.2635e-06	7.9967e-06	5.5042e-06
K00583	6.7776e-06	6.3515e-06	4.4469e-06	4.4922e-06	3.5549e-06	5.246e-06	5.5262e-06	4.1209e-06	4.4782e-06	6.0303e-06	3.4949e-06	5.6105e-06	5.1988e-06	6.8007e-06	6.7891e-06	1.9399e-06	6.7997e-06	4.3862e-06	7.9967e-06	3.766e-06
K00584	5.5989e-06	8.1662e-06	4.4469e-06	7.7865e-06	4.4437e-06	6.1204e-06	4.6052e-06	5.887e-06	5.8776e-06	3.1587e-06	6.1161e-06	6.2011e-06	4.6211e-06	5.9137e-06	7.6746e-06	3.3256e-06	5.3215e-06	4.3862e-06	6.812e-06	7.532e-06
K00586	5.8936e-06	6.049e-06	6.5221e-06	6.888e-06	5.9249e-06	6.7032e-06	5.5262e-06	5.5926e-06	3.9184e-06	5.1688e-06	4.3686e-06	7.0869e-06	5.7764e-06	5.0266e-06	5.3132e-06	4.157e-06	3.8433e-06	5.8483e-06	5.9235e-06	5.2145e-06
K00587	6.4829e-06	4.2343e-06	3.854e-06	4.1927e-06	6.8136e-06	6.4118e-06	6.4472e-06	5.5926e-06	6.1575e-06	5.1688e-06	3.7862e-06	5.6105e-06	3.177e-06	5.3223e-06	4.1325e-06	3.8799e-06	4.7302e-06	7.3104e-06	5.035e-06	6.3733e-06
K00588	6.1883e-06	6.3515e-06	2.9646e-06	5.6901e-06	4.4437e-06	5.246e-06	4.2982e-06	5.887e-06	4.7581e-06	5.456e-06	3.2037e-06	7.0869e-06	7.5093e-06	4.4353e-06	3.247e-06	5.8198e-06	5.0259e-06	3.2166e-06	5.035e-06	6.3733e-06
K00589	5.5989e-06	6.6539e-06	6.5221e-06	5.9896e-06	5.6286e-06	4.6631e-06	6.1402e-06	8.8304e-06	7.277e-06	4.8817e-06	4.3686e-06	6.4964e-06	6.354e-06	4.1396e-06	6.4939e-06	5.2655e-06	4.4346e-06	4.971e-06	4.7388e-06	5.2145e-06
K00590	3.9487e-05	3.6294e-05	4.269e-05	1.2578e-05	2.2515e-05	4.1968e-05	1.9342e-05	1.2951e-05	3.6105e-05	4.3935e-05	2.9707e-05	1.4174e-05	1.6174e-05	1.0053e-05	3.5421e-05	3.8244e-05	3.3999e-05	2.1054e-05	1.4216e-05	3.0708e-05
K00591	5.3042e-06	5.1417e-06	7.115e-06	6.2891e-06	5.9249e-06	5.8289e-06	3.3771e-06	6.77e-06	3.6385e-06	4.0202e-06	5.2424e-06	6.4964e-06	5.1988e-06	4.7309e-06	5.018e-06	4.7113e-06	5.3215e-06	4.971e-06	3.8503e-06	6.0836e-06
K00592	6.4829e-06	6.3515e-06	4.7434e-06	5.6901e-06	5.9249e-06	5.5375e-06	8.2893e-06	6.1813e-06	5.0379e-06	3.4459e-06	7.8636e-06	5.9058e-06	5.4876e-06	4.7309e-06	4.4277e-06	3.8799e-06	3.5477e-06	9.6497e-06	2.9618e-06	4.0557e-06
K00594	5.3042e-06	4.5368e-06	5.9292e-06	5.0912e-06	3.5549e-06	5.8289e-06	5.8332e-06	4.1209e-06	3.0787e-06	4.3074e-06	5.5336e-06	6.7917e-06	4.0435e-06	7.6878e-06	6.1987e-06	4.9884e-06	6.7997e-06	6.1407e-06	4.1465e-06	6.0836e-06
K00595	0.0001497	8.2569e-05	0.00010198	0.00014345	0.00015671	0.0001294	9.5788e-05	0.00017337	6.6893e-05	8.4424e-05	0.00012407	0.00010099	6.4984e-05	0.00014784	0.00010508	0.00014189	0.00014575	0.00014445	0.00012025	0.00011675
K00596	5.3042e-06	6.049e-06	5.9292e-06	6.2891e-06	3.2587e-06	4.0802e-06	9.2104e-06	4.7096e-06	5.3178e-06	6.6046e-06	4.0774e-06	5.9058e-06	7.2205e-06	3.8439e-06	3.8373e-06	3.6027e-06	2.9564e-06	5.8483e-06	5.035e-06	5.7939e-06
K00597	5.8936e-06	5.4441e-06	4.1504e-06	6.2891e-06	5.9249e-06	5.246e-06	7.3683e-06	5.887e-06	6.1575e-06	5.456e-06	4.3686e-06	4.4293e-06	4.3323e-06	7.3921e-06	7.3794e-06	4.4341e-06	7.0954e-06	5.2635e-06	4.4426e-06	6.0836e-06
K00598	3.5951e-05	7.9847e-05	5.9588e-05	8.1758e-05	7.9394e-05	8.3645e-05	7.0613e-05	6.8583e-05	5.6817e-05	4.4797e-05	8.8538e-05	9.9808e-05	6.8739e-05	4.9675e-05	6.0216e-05	6.7343e-05	0.0001014	6.9887e-05	6.3678e-05	8.7198e-05
K00599	0.00071843	0.0005432	0.00064717	0.00058399	0.00051635	0.00074435	0.00051824	0.0007291	0.00065633	0.00068458	0.00050647	0.00057611	0.00073678	0.0006233	0.0006609	0.00064877	0.0004881	0.00051611	0.00057428	0.00056635
K00600	0.0008142	0.0007032	0.00076427	0.00069689	0.00071958	0.00087638	0.00079025	0.00082888	0.00075877	0.0007713	0.0007019	0.00077248	0.00073909	0.00076907	0.00070311	0.00074244	0.0008204	0.00083075	0.00074103	0.00072134
K00601	5.8936e-06	5.7466e-06	5.6327e-06	3.2943e-06	4.1474e-06	5.8289e-06	7.3683e-06	6.77e-06	4.4782e-06	2.8716e-06	5.5336e-06	5.9058e-06	4.6211e-06	8.5748e-06	4.1325e-06	3.6027e-06	5.0259e-06	3.2166e-06	5.035e-06	6.0836e-06
K00602	0.00075939	0.00078153	0.0007536	0.00077356	0.00065944	0.00070588	0.00074328	0.00076648	0.00079795	0.00079169	0.0007118	0.00068655	0.00077404	0.00073241	0.00071817	0.00071251	0.00066578	0.00076028	0.00072326	0.00071757
K00603	4.6854e-05	5.8676e-05	5.188e-05	4.2526e-05	2.9328e-05	3.0019e-05	5.4648e-05	3.2378e-05	3.1627e-05	1.5794e-05	3.0289e-05	1.3288e-05	6.354e-06	4.524e-05	2.2729e-05	6.9283e-06	5.0554e-05	4.123e-05	3.7614e-05	2.2017e-05
K00604	0.00054634	0.00052354	0.00056387	0.00046389	0.00046688	0.00051936	0.0005299	0.00046566	0.00055949	0.0005166	0.00049074	0.00045681	0.00050255	0.00049379	0.00053191	0.00047944	0.00045588	0.00052108	0.00048395	0.00046872
K00605	0.00034242	0.00039712	0.00040704	0.00041748	0.00034276	0.00035119	0.00041969	0.00038736	0.0003493	0.00037732	0.00035648	0.00039746	0.00039539	0.00040243	0.00031141	0.00035889	0.00044849	0.00037078	0.00040161	0.00045945
K00606	0.00034035	0.00037655	0.0003519	0.00036327	0.00031343	0.00031185	0.00035675	0.00033173	0.00030871	0.0003667	0.0003658	0.00034076	0.00031915	0.00031609	0.00029724	0.00029459	0.00037398	0.00033598	0.00030121	0.00037515
K00607	4.1255e-06	7.5613e-06	6.5221e-06	3.8932e-06	5.0362e-06	5.8289e-06	6.1402e-06	3.2378e-06	5.0379e-06	5.1688e-06	6.4073e-06	4.4293e-06	3.177e-06	5.618e-06	5.6084e-06	5.8198e-06	4.7302e-06	4.3862e-06	4.4426e-06	8.1114e-06
K00608	4.1255e-06	6.9564e-06	5.6327e-06	5.6901e-06	2.6662e-06	2.9145e-06	3.3771e-06	2.9435e-06	5.0379e-06	4.3074e-06	4.3686e-06	4.1341e-06	5.7764e-06	4.1396e-06	5.3132e-06	4.4341e-06	7.6866e-06	4.6786e-06	3.2579e-06	4.0557e-06
K00609	0.00054457	0.00048332	0.00056653	0.00049474	0.00045237	0.00055171	0.00055845	0.0004948	0.0005455	0.00052148	0.00050036	0.00047866	0.00052565	0.00051715	0.00054844	0.00049053	0.00046977	0.00054184	0.00048425	0.00048784
K00610	6.1588e-05	7.5915e-05	6.0478e-05	6.4388e-05	5.4213e-05	3.0602e-05	7.5832e-05	3.591e-05	6.2694e-05	4.7094e-05	6.1161e-05	4.6656e-05	5.1121e-05	5.1153e-05	5.4903e-05	5.5981e-05	5.9128e-05	5.9945e-05	5.4792e-05	7.2423e-05
K00611	0.00053838	0.00076732	0.00072573	0.00060285	0.00053798	0.00061786	0.00067082	0.00058634	0.00073134	0.00074718	0.00049948	0.00062542	0.00075411	0.0006987	0.00067802	0.00058614	0.00061611	0.0005936	0.00062108	0.00060025
K00612	8.1921e-05	0.00011312	9.6646e-05	0.00016142	0.00016797	0.0002556	0.00017868	0.00020752	2.9108e-05	0.00011458	0.00015611	0.00026045	0.0001239	0.00015228	8.265e-05	0.00013496	0.00025898	0.00015381	0.00013387	0.00015962
K00613	5.039e-05	2.2079e-05	3.8836e-05	5.0612e-05	3.7623e-05	1.6321e-05	1.8114e-05	6.77e-05	6.4934e-05	3.532e-05	3.524e-05	4.1341e-05	3.9279e-05	3.5778e-05	5.9626e-05	6.4572e-05	6.5041e-06	4.5324e-05	1.392e-05	4.9827e-05
K00614	5.5989e-06	6.9564e-06	4.1504e-06	5.3906e-06	5.3324e-06	6.9947e-06	7.0613e-06	6.1813e-06	5.3178e-06	4.8817e-06	3.7862e-06	4.7246e-06	6.0652e-06	6.2094e-06	3.247e-06	6.9283e-06	4.4346e-06	4.971e-06	7.1082e-06	5.5042e-06
K00615	0.0018002	0.0021344	0.0016415	0.0020643	0.0017603	0.0017688	0.0020115	0.0018853	0.0017479	0.0020282	0.0015998	0.0018659	0.0021526	0.0014625	0.0019396	0.0019446	0.0014214	0.0015586	0.0016097	0.0020209
K00616	0.00047296	0.00054925	0.0005025	0.00054416	0.00045681	0.00038937	0.00049859	0.00047979	0.00051835	0.00049563	0.00047327	0.0005203	0.00052247	0.0004246	0.00046579	0.00047362	0.00043903	0.00048102	0.0004025	0.00055824
K00617	3.2415e-06	3.0245e-06	5.9292e-06	5.6901e-06	5.6286e-06	3.2059e-06	5.5262e-06	5.0039e-06	4.1983e-06	6.6046e-06	3.7862e-06	5.6105e-06	6.0652e-06	4.4353e-06	7.6746e-06	5.5427e-06	3.252e-06	4.3862e-06	4.1465e-06	5.5042e-06
K00618	4.7149e-06	5.1417e-06	2.9646e-06	5.6901e-06	3.5549e-06	4.3717e-06	4.9122e-06	3.8265e-06	8.9563e-06	5.7431e-06	7.2811e-06	7.3822e-06	4.3323e-06	6.2094e-06	4.7228e-06	3.8799e-06	7.0954e-06	6.4331e-06	6.5159e-06	4.9248e-06
K00619	1.385e-05	5.5349e-05	4.5062e-05	4.7318e-05	2.9032e-05	3.031e-05	3.1315e-05	1.9133e-05	1.3435e-05	3.0151e-05	5.2133e-05	4.9609e-05	5.3143e-05	3.7552e-05	3.6012e-05	8.314e-06	5.1146e-05	1.8715e-05	4.1465e-05	4.693e-05
K00620	0.00036098	0.00034328	0.00036791	0.00039202	0.00032972	0.00032059	0.00046328	0.000302	0.00027597	0.00042758	0.0003291	0.00042699	0.00047366	0.00037936	0.00035923	0.0003018	0.00035595	0.00032546	0.00037377	0.00042411
K00621	2.9468e-06	4.2343e-06	4.1504e-06	5.0912e-06	5.0362e-06	1.7487e-06	5.5262e-06	3.8265e-06	5.0379e-06	2.5844e-06	5.2424e-06	5.6105e-06	6.9317e-06	4.4353e-06	3.5421e-06	4.7113e-06	4.7302e-06	4.971e-06	4.4426e-06	4.6351e-06
K00622	7.6617e-06	4.2343e-06	5.3363e-06	3.8932e-06	5.0362e-06	5.246e-06	4.6052e-06	2.9435e-06	5.8776e-06	3.1587e-06	5.5336e-06	5.3152e-06	5.1988e-06	4.1396e-06	4.1325e-06	3.3256e-06	7.391e-06	3.2166e-06	5.3312e-06	5.2145e-06
K00623	2.9468e-06	3.6294e-06	3.5575e-06	4.7917e-06	5.9249e-06	4.3717e-06	2.7631e-06	7.6531e-06	7.8368e-06	5.1688e-06	3.7862e-06	6.2011e-06	2.3106e-06	5.3223e-06	5.6084e-06	4.9884e-06	6.2084e-06	5.5559e-06	7.1082e-06	5.2145e-06
K00624	3.5362e-06	5.4441e-06	5.0398e-06	7.1875e-06	4.7399e-06	4.0802e-06	7.0613e-06	5.0039e-06	5.0379e-06	3.733e-06	3.7862e-06	7.0869e-06	5.4876e-06	2.9568e-06	6.4939e-06	4.157e-06	4.4346e-06	3.8014e-06	5.6273e-06	6.9526e-06
K00625	0.00039929	0.000395	0.00036109	0.00038783	0.00036083	0.00036606	0.00037885	0.00034174	0.00033894	0.00041121	0.00034949	0.00030799	0.00040666	0.00042076	0.00038934	0.00033783	0.00030303	0.00035645	0.0004336	0.00030128
K00626	0.00091026	0.00090614	0.0009125	0.0011042	0.0011651	0.0011556	0.0011261	0.0010788	0.00070251	0.00095365	0.0011195	0.0012948	0.0010441	0.0011481	0.0010048	0.0010102	0.0012101	0.0010378	0.0010698	0.0010895
K00627	0.00085958	0.00081359	0.00088019	0.00087209	0.00079008	0.00098217	0.00092134	0.000896	0.00093622	0.00094992	0.00087256	0.00097357	0.0009531	0.00092667	0.00084509	0.00084553	0.0009221	0.00093456	0.00096287	0.00084243
K00628	4.4202e-06	6.3515e-06	7.115e-06	6.2891e-06	5.0362e-06	4.6631e-06	6.1402e-06	5.5926e-06	3.0787e-06	4.3074e-06	3.7862e-06	4.4293e-06	6.0652e-06	6.2094e-06	5.018e-06	5.2655e-06	5.3215e-06	4.971e-06	5.3312e-06	6.3733e-06
K00629	5.3042e-06	6.3515e-06	4.7434e-06	4.7917e-06	5.9249e-06	6.1204e-06	6.1402e-06	3.2378e-06	1.9592e-06	4.8817e-06	5.2424e-06	6.2011e-06	5.7764e-06	7.0964e-06	5.9036e-06	4.9884e-06	4.4346e-06	5.2635e-06	4.4426e-06	6.0836e-06
K00630	5.3042e-06	3.6294e-06	4.7434e-06	4.7917e-06	5.3324e-06	6.7032e-06	5.5262e-06	7.3587e-06	5.0379e-06	5.7431e-06	2.9124e-06	6.7917e-06	6.354e-06	5.0266e-06	6.4939e-06	6.9283e-06	5.3215e-06	4.3862e-06	5.035e-06	6.9526e-06
K00631	0.00020156	0.00012703	0.00013608	0.00014225	0.00029684	0.00028533	0.00020938	0.00028817	0.00022699	0.00014674	0.00019455	0.00027432	0.00013921	0.00024867	0.00018419	0.00029792	0.00028056	0.00025469	0.00020643	0.00017497
K00632	0.00026285	0.00027735	0.0003015	0.00029199	0.00040467	0.0003917	0.0002935	0.00037029	0.00029976	0.00028199	0.00037949	0.00040218	0.00030182	0.00041337	0.00028809	0.00037247	0.00045469	0.00030002	0.00036311	0.00033344
K00633	1.7091e-05	5.9281e-05	4.6544e-05	4.9115e-05	4.5918e-05	2.4481e-05	7.9823e-06	2.502e-05	5.3178e-05	3.4172e-05	5.8831e-05	3.8683e-05	4.5345e-05	4.1987e-05	4.3686e-05	3.9076e-05	5.1146e-05	2.4855e-05	5.2127e-05	5.0986e-05
K00634	9.1351e-05	0.00017542	0.00011443	0.00015004	0.00010309	7.8107e-05	0.00012526	0.00010067	6.1855e-05	0.00012348	0.00010397	0.00011546	0.00013315	8.9297e-05	0.00010833	7.0392e-05	0.00010909	6.2869e-05	0.00013032	0.00013876
K00635	5.8347e-05	9.0735e-06	3.2907e-05	2.6654e-05	5.5694e-05	5.654e-05	7.6446e-05	5.9164e-05	4.5901e-05	2.2111e-05	3.6988e-05	7.9728e-05	2.2239e-05	5.7658e-05	5.5198e-05	5.2378e-05	4.2277e-05	7.4858e-05	5.1831e-05	2.7521e-05
K00637	7.6617e-06	6.049e-06	6.8186e-06	5.6901e-06	5.0362e-06	6.9947e-06	4.9122e-06	6.1813e-06	4.7581e-06	5.456e-06	4.6599e-06	6.2011e-06	5.1988e-06	5.0266e-06	5.6084e-06	3.3256e-06	5.6172e-06	4.0938e-06	5.3312e-06	4.9248e-06
K00638	0.00014557	0.00020113	0.00015297	0.00018148	0.00020145	0.00015825	0.00022903	0.00016395	8.7045e-05	0.00012951	0.00016863	0.00021231	0.00015336	0.00015849	0.00017297	0.00010448	0.00019098	0.00014328	0.00016408	0.00016773
K00639	0.00022484	0.00030185	0.00030684	0.00029199	0.00025714	0.00019935	0.00022903	0.00021929	0.00028324	0.00020848	0.00031134	0.00022088	0.00024088	0.00026612	0.00027068	0.00023002	0.00023651	0.00021522	0.00026863	0.00031084
K00640	0.00047561	0.00041738	0.00043194	0.00042317	0.000442	0.00044067	0.00049705	0.00047243	0.00046713	0.00044193	0.00040308	0.00042226	0.00041619	0.00046038	0.00041	0.00046919	0.00043104	0.00045792	0.00042679	0.00039949
K00641	0.00024517	0.00027221	0.00030891	0.00025246	0.00019226	0.00024656	0.00033249	0.00027934	0.00027149	0.00031472	0.00022775	0.00028171	0.00024954	0.00028859	0.00020574	0.00019981	0.00029268	0.00027809	0.00026834	0.00028245
K00643	9.0467e-05	1.9659e-05	2.5792e-05	0.00013357	0.00013094	2.4481e-05	2.978e-05	8.4772e-05	1.2035e-05	7.4087e-05	0.00012174	3.6321e-05	6.7295e-05	9.4028e-05	6.7891e-05	0.00011501	2.8973e-05	0.00010118	8.0264e-05	8.7198e-05
K00645	0.0005204	0.0005305	0.00050102	0.00049235	0.00046659	0.00048934	0.00054495	0.00044093	0.00050659	0.00054732	0.00048987	0.00050081	0.00051959	0.00048049	0.00054519	0.00049856	0.00043666	0.00047342	0.00044871	0.00053796
K00646	5.8936e-06	4.8392e-06	6.5221e-06	4.7917e-06	5.0362e-06	4.3717e-06	5.8332e-06	4.1209e-06	6.1575e-06	4.3074e-06	5.5336e-06	5.9058e-06	6.9317e-06	7.3921e-06	4.4277e-06	5.5427e-06	6.2084e-06	4.971e-06	7.7006e-06	5.7939e-06
K00647	0.00037719	0.0002096	0.00024399	0.00030038	0.00043341	0.00040103	0.00037916	0.00040679	0.00024182	0.00021479	0.00033522	0.00035641	0.00017069	0.00041839	0.00028957	0.00036415	0.00040591	0.00041464	0.00034268	0.0002445
K00648	0.00061323	0.00070955	0.00065132	0.00065137	0.0006233	0.00069568	0.00071841	0.00063609	0.00061463	0.00069664	0.00061598	0.00073645	0.00072869	0.0006851	0.00068393	0.00064433	0.0007122	0.00064448	0.00063382	0.00067788
K00649	4.7149e-06	4.5368e-06	5.0398e-06	6.888e-06	4.1474e-06	6.1204e-06	5.8332e-06	5.887e-06	3.0787e-06	4.3074e-06	4.6599e-06	5.6105e-06	6.6429e-06	3.8439e-06	5.6084e-06	3.8799e-06	4.139e-06	6.7255e-06	5.9235e-06	6.663e-06
K00650	5.8936e-06	4.5368e-06	6.2257e-06	8.086e-06	6.5174e-06	4.6631e-06	4.9122e-06	4.1209e-06	5.0379e-06	5.1688e-06	4.6599e-06	5.3152e-06	4.3323e-06	4.1396e-06	4.4277e-06	5.5427e-06	2.6608e-06	3.8014e-06	4.1465e-06	4.9248e-06
K00651	0.00019773	0.00022321	0.0001675	0.00021113	0.00021211	0.00015417	0.00015995	0.00018426	0.00018193	0.00019268	0.00021785	0.00016802	0.00020217	0.00016558	0.00020603	0.00017044	0.00019217	0.00013685	0.00019577	0.00019381
K00652	0.00043996	0.00039349	0.00051199	0.000345	0.00034631	0.00035964	0.00040955	0.00040914	0.00048448	0.0003644	0.00033842	0.00031803	0.00027265	0.00044027	0.0004165	0.00034337	0.00045469	0.00040733	0.00037555	0.00035053
K00653	6.4829e-06	4.8392e-06	5.3363e-06	4.1927e-06	5.6286e-06	5.8289e-06	6.4472e-06	7.0644e-06	5.0379e-06	4.8817e-06	5.5336e-06	8.2681e-06	4.0435e-06	5.618e-06	3.5421e-06	6.6512e-06	5.9128e-06	5.8483e-06	6.2197e-06	3.4763e-06
K00654	5.8936e-06	4.5368e-06	3.2611e-06	3.8932e-06	4.4437e-06	4.6631e-06	4.6052e-06	5.5926e-06	6.9971e-06	6.0303e-06	4.0774e-06	5.3152e-06	5.4876e-06	8.2792e-06	3.5421e-06	3.6027e-06	6.2084e-06	7.0179e-06	6.5159e-06	2.6072e-06
K00655	0.00057492	0.00043493	0.00049183	0.00051091	0.00050954	0.00044824	0.0004903	0.00052011	0.00045565	0.00050568	0.0004855	0.00049343	0.00052132	0.00045831	0.00047907	0.0005418	0.00044435	0.00051056	0.00043893	0.00054202
K00656	0.0013597	0.0020255	0.0014014	0.0017046	0.0015206	0.0013657	0.0015624	0.0013537	0.0018016	0.0017008	0.0013377	0.0014584	0.0018695	0.0011059	0.0016846	0.0014267	0.0011592	0.0012749	0.0013825	0.0015496
K00657	0.00020628	0.00029882	0.00027007	0.00023329	0.00023611	0.00023112	0.00024714	0.00021635	0.0002421	0.0002616	0.00022367	0.00024332	0.00024636	0.0002738	0.00025208	0.00018928	0.00028559	0.00020908	0.00031247	0.00022277
K00658	0.00042876	0.00038563	0.00044854	0.0004591	0.00036794	0.00030514	0.00042736	0.00044241	0.00046377	0.00037732	0.00045172	0.00041281	0.00035265	0.00042608	0.00039495	0.0003672	0.0003867	0.00047927	0.00038177	0.0004554
K00659	5.3042e-06	5.4441e-06	4.1504e-06	4.4922e-06	4.4437e-06	5.8289e-06	4.2982e-06	5.887e-06	5.3178e-06	4.5945e-06	3.7862e-06	4.4293e-06	5.1988e-06	5.618e-06	5.6084e-06	3.3256e-06	5.9128e-06	6.1407e-06	6.2197e-06	4.0557e-06
K00660	5.3042e-05	6.2003e-05	4.8619e-05	0.00010602	6.9025e-05	5.0129e-05	8.013e-05	4.7684e-05	2.0432e-05	3.733e-05	0.00010689	8.0614e-05	8.0869e-05	5.5589e-05	7.5861e-05	6.8452e-05	3.5772e-05	6.5501e-05	6.5751e-05	0.00011124
K00661	0.00024311	0.00031425	0.00027156	0.00027372	0.00026632	0.00026172	0.00026864	0.00023842	0.00028185	0.0002504	0.00023532	0.00022147	0.00024838	0.00020373	0.00028012	0.00023057	0.00021197	0.00025996	0.00028166	0.00022683
K00662	8.1626e-05	0.0001231	9.7832e-05	0.0001123	8.8577e-05	9.5011e-05	0.00011083	7.2998e-05	4.6181e-05	0.00010539	8.6208e-05	0.00011959	0.00013632	8.0722e-05	8.8553e-05	6.4572e-05	9.7857e-05	7.515e-05	0.00012972	0.00012022
K00663	5.3042e-06	3.4479e-05	2.9646e-05	2.0664e-05	2.2515e-05	1.6321e-05	7.3683e-06	1.5895e-05	1.5953e-05	3.0439e-05	2.9707e-05	2.067e-05	2.7438e-05	3.3412e-05	1.712e-05	6.9283e-06	3.3112e-05	4.6786e-06	3.6133e-05	2.4334e-05
K00664	5.8936e-06	4.8392e-06	3.2611e-06	5.0912e-06	3.8512e-06	5.246e-06	6.7543e-06	2.0604e-06	4.7581e-06	4.3074e-06	3.2037e-06	6.4964e-06	5.7764e-06	6.8007e-06	6.1987e-06	6.3741e-06	4.4346e-06	4.971e-06	4.1465e-06	5.7939e-06
K00665	5.3042e-06	3.9319e-06	6.5221e-06	7.1875e-06	4.7399e-06	5.246e-06	7.9823e-06	4.4152e-06	4.7581e-06	5.456e-06	6.1161e-06	7.9728e-06	6.0652e-06	6.5051e-06	5.6084e-06	3.6027e-06	5.6172e-06	4.6786e-06	5.035e-06	5.5042e-06
K00666	0.00047178	0.00041012	0.00042898	0.00055823	0.0006387	0.00075922	0.00061924	0.00075235	0.00027177	0.00041351	0.00057812	0.00074236	0.00038817	0.00066115	0.00038048	0.00048193	0.00076719	0.00062255	0.00054911	0.0004835
K00667	3.2415e-06	7.5613e-06	5.3363e-06	5.9896e-06	5.0362e-06	4.0802e-06	6.1402e-06	6.77e-06	5.3178e-06	4.3074e-06	5.2424e-06	4.7246e-06	6.6429e-06	7.0964e-06	4.1325e-06	4.7113e-06	6.7997e-06	7.0179e-06	5.6273e-06	5.2145e-06
K00668	5.3042e-06	4.8392e-06	5.0398e-06	6.5886e-06	5.9249e-06	5.246e-06	5.8332e-06	5.0039e-06	4.1983e-06	6.0303e-06	3.7862e-06	4.7246e-06	4.0435e-06	3.5482e-06	4.7228e-06	4.9884e-06	5.0259e-06	3.8014e-06	4.7388e-06	3.4763e-06
K00669	6.4829e-06	4.5368e-06	4.1504e-06	5.9896e-06	7.1099e-06	5.246e-06	6.1402e-06	4.4152e-06	5.0379e-06	3.1587e-06	4.6599e-06	7.3822e-06	8.0869e-06	6.8007e-06	4.7228e-06	5.2655e-06	4.7302e-06	4.6786e-06	4.4426e-06	4.6351e-06
K00670	6.7776e-06	3.0245e-06	7.708e-06	4.4922e-06	4.7399e-06	5.246e-06	7.3683e-06	3.5322e-06	3.9184e-06	4.5945e-06	6.6986e-06	7.0869e-06	6.354e-06	6.2094e-06	7.3794e-06	5.8198e-06	5.9128e-06	7.3104e-06	7.1082e-06	2.6072e-06
K00671	6.7776e-06	6.049e-06	4.7434e-06	6.5886e-06	4.7399e-06	2.9145e-06	4.2982e-06	4.7096e-06	5.0379e-06	4.5945e-06	7.2811e-06	5.3152e-06	5.7764e-06	5.618e-06	3.5421e-06	4.4341e-06	4.4346e-06	5.8483e-06	6.5159e-06	3.1866e-06
K00672	4.1255e-06	5.7466e-06	5.3363e-06	3.8932e-06	7.1099e-06	5.5375e-06	8.5963e-06	5.0039e-06	3.3586e-06	4.8817e-06	4.9511e-06	7.0869e-06	5.1988e-06	5.0266e-06	5.018e-06	5.5427e-06	3.8433e-06	4.0938e-06	5.9235e-06	5.2145e-06
K00673	0.00015942	6.3212e-05	9.7239e-05	8.8347e-05	0.00019493	0.00021217	0.00017315	0.0002137	0.00013211	0.0001051	0.00012349	0.00021586	7.7981e-05	0.00018894	0.00012752	0.00018651	0.00021907	0.00019767	0.00015845	0.00011037
K00674	0.00037984	0.00018298	0.00023361	0.00026025	0.00027729	0.00025764	0.00023241	0.00031701	0.00032607	0.00030008	0.0002694	0.00028525	0.00023077	0.00020964	0.00027156	0.00033062	0.00023089	0.00028627	0.00019518	0.00030476
K00675	2.6226e-05	0.00012038	9.9611e-05	7.4571e-05	9.154e-05	4.6631e-05	1.0131e-05	5.6515e-05	9.908e-05	8.6147e-05	0.00012116	7.3527e-05	9.3289e-05	0.00010172	7.6451e-05	5.3487e-05	0.00011086	2.7487e-05	0.00010396	9.9655e-05
K00676	4.597e-05	0.00021262	0.000201	0.00013027	0.00015197	0.00011425	2.9166e-05	0.00011892	7.8648e-05	0.00016569	0.00020416	0.00013406	0.00018196	0.00021821	0.00014287	3.1593e-05	0.00023415	3.4212e-05	0.00024168	0.00016426
K00677	0.00024282	0.0001482	0.00019507	0.00014884	0.00019286	0.00018011	0.0002146	0.00017425	0.00017969	0.00014588	0.00018902	0.00014056	9.7332e-05	0.00018776	0.00014966	0.00017986	0.00022942	0.00021873	0.00017622	0.00016773
K00678	6.1883e-06	3.6294e-06	4.1504e-06	4.1927e-06	5.0362e-06	4.6631e-06	6.4472e-06	2.9435e-06	6.4374e-06	4.5945e-06	4.6599e-06	5.3152e-06	5.7764e-06	3.8439e-06	3.247e-06	6.3741e-06	6.7997e-06	4.3862e-06	4.1465e-06	5.5042e-06
K00679	3.5362e-06	3.6294e-06	6.8186e-06	6.5886e-06	5.6286e-06	4.0802e-06	5.5262e-06	4.7096e-06	4.7581e-06	6.6046e-06	4.0774e-06	6.2011e-06	5.4876e-06	5.0266e-06	5.6084e-06	5.8198e-06	4.139e-06	7.6028e-06	9.1814e-06	4.6351e-06
K00680	0.00023162	0.0001975	0.00023065	0.00019826	0.00023818	0.00031126	0.00026802	0.00028699	0.00019536	0.00020216	0.00021494	0.00028879	0.00021893	0.00034536	0.00023673	0.00027492	0.00018951	0.00025879	0.00026567	0.00018425
K00681	0.00062502	0.00041194	0.00052681	0.00049205	0.00059871	0.00062719	0.00062446	0.00058899	0.00044642	0.00052952	0.00056734	0.00059176	0.00044652	0.0006783	0.00051597	0.00063824	0.00068973	0.00064126	0.00052157	0.00057446
K00682	7.6617e-06	3.9319e-06	5.6327e-06	4.7917e-06	5.3324e-06	3.2059e-06	5.5262e-06	5.2983e-06	4.4782e-06	2.2973e-06	4.0774e-06	4.7246e-06	4.6211e-06	2.3655e-06	6.1987e-06	4.157e-06	4.4346e-06	5.5559e-06	4.1465e-06	3.4763e-06
K00683	6.1883e-06	6.049e-06	3.5575e-06	5.9896e-06	6.2211e-06	3.7888e-06	5.8332e-06	4.1209e-06	5.5977e-06	5.1688e-06	4.0774e-06	5.9058e-06	3.177e-06	5.0266e-06	5.018e-06	2.7713e-06	6.7997e-06	5.5559e-06	4.4426e-06	4.3454e-06
K00684	0.00019802	0.00015274	0.00015831	0.00021143	0.00019374	0.00015097	0.00020969	0.0001875	0.00016401	0.00013755	0.00018581	0.00021615	0.0001551	0.00017771	0.00018272	0.00019843	0.00017591	0.00020089	0.00015727	0.00022133
K00685	8.9288e-05	1.1191e-05	4.1208e-05	6.2891e-05	0.00011198	8.0148e-05	6.4779e-05	9.8018e-05	2.7709e-05	6.2887e-05	6.7568e-05	9.0949e-05	4.8522e-05	9.6689e-05	6.2578e-05	0.00011279	7.2432e-05	9.7082e-05	7.2267e-05	5.9967e-05
K00686	8.251e-06	2.7221e-06	3.2611e-06	6.2891e-06	4.1474e-06	5.8289e-06	4.6052e-06	4.7096e-06	5.0379e-06	5.7431e-06	5.2424e-06	4.4293e-06	6.9317e-06	7.3921e-06	6.1987e-06	3.3256e-06	5.6172e-06	4.0938e-06	7.7006e-06	5.2145e-06
K00687	0.00023987	0.00017814	0.00022946	0.00014465	0.00017064	0.00034536	0.0001753	0.00020369	0.00035965	0.00025902	0.00015873	0.00013318	0.00027929	0.00024098	0.00025385	0.00024277	0.0001425	0.00020878	0.00024049	0.00010371
K00688	0.0011242	0.0012594	0.00096616	0.0013411	0.0012193	0.00097547	0.0010389	0.0011559	0.0011218	0.0010381	0.0011842	0.0011826	0.0012226	0.0008841	0.0011562	0.00096997	0.00099601	0.00095064	0.00097797	0.0011431
K00689	0.00057816	2.4499e-05	0.00017373	0.00031385	0.00020944	0.00033545	0.00013478	8.5067e-05	0.0003994	0.00052952	0.000316	0.00037827	0.00066457	0.0001372	0.00031702	0.00010476	0.00029002	0.00010966	0.00043893	0.00013355
K00690	0.00018034	0.00023773	0.00013934	0.00024138	0.00013805	0.00022878	0.00015965	0.00019339	0.00027513	0.00027596	0.00016601	0.00019725	0.00029806	8.9297e-05	0.00017622	0.00025607	0.00015019	0.00012164	0.00023546	0.00025841
K00691	0.00027435	0.0001733	0.00030239	0.0001743	0.00017123	0.00025997	0.00038254	0.00012127	0.00024658	0.00029979	0.00020562	0.00017983	0.00029546	0.00025547	0.00022197	0.00025857	0.00023799	0.00034827	0.00038503	0.0002784
K00692	0.00010992	1.1191e-05	3.8836e-05	6.6485e-05	4.2659e-05	6.9655e-05	3.1929e-05	2.5903e-05	8.0047e-05	0.00010453	6.5238e-05	7.4413e-05	0.00013921	2.3359e-05	6.3463e-05	1.7459e-05	5.2624e-05	2.2223e-05	8.3818e-05	3.0997e-05
K00693	4.7149e-06	5.4441e-06	5.0398e-06	4.1927e-06	5.6286e-06	4.0802e-06	8.2893e-06	5.0039e-06	4.4782e-06	6.3175e-06	6.4073e-06	4.1341e-06	5.7764e-06	5.0266e-06	5.3132e-06	4.7113e-06	5.9128e-06	5.5559e-06	1.7771e-06	6.3733e-06
K00694	0.00019773	0.0001361	0.00010228	0.00027462	0.00029802	8.8017e-05	5.956e-05	0.00016896	0.00017633	0.00015909	0.00033639	0.00011664	0.00018571	0.00019426	0.0001957	0.00030429	0.00013659	0.00023539	0.00018689	0.0002361
K00695	6.1883e-06	5.1417e-06	5.3363e-06	2.9948e-06	3.8512e-06	5.246e-06	6.4472e-06	4.7096e-06	4.4782e-06	5.7431e-06	5.8249e-06	4.7246e-06	4.6211e-06	4.4353e-06	4.7228e-06	6.6512e-06	4.4346e-06	3.8014e-06	7.1082e-06	8.1114e-06
K00696	7.367e-06	2.7221e-06	5.3363e-06	4.7917e-06	3.8512e-06	6.1204e-06	6.1402e-06	4.7096e-06	4.1983e-06	4.3074e-06	4.6599e-06	3.5435e-06	3.7547e-06	5.0266e-06	5.6084e-06	4.7113e-06	6.7997e-06	5.8483e-06	5.6273e-06	6.9526e-06
K00697	0.0002823	0.0002093	0.00023598	0.00027402	0.00027255	0.00017982	0.00021982	0.00024872	0.00027177	0.00014559	0.0002627	0.00021527	0.00013661	0.00025961	0.00023437	0.00025718	0.00021759	0.00027984	0.00022628	0.00021814
K00698	5.3042e-06	5.7466e-06	5.6327e-06	4.1927e-06	4.4437e-06	4.3717e-06	5.2192e-06	5.2983e-06	3.3586e-06	6.8918e-06	6.4073e-06	5.0199e-06	6.6429e-06	7.3921e-06	7.9698e-06	5.2655e-06	5.6172e-06	4.6786e-06	5.3312e-06	4.0557e-06
K00699	5.5989e-06	5.7466e-06	5.3363e-06	6.5886e-06	5.3324e-06	3.7888e-06	6.1402e-06	4.1209e-06	4.4782e-06	4.8817e-06	3.2037e-06	5.9058e-06	3.177e-06	5.0266e-06	5.9036e-06	4.4341e-06	5.3215e-06	4.0938e-06	5.3312e-06	4.9248e-06
K00700	0.00062443	0.00069745	0.00061367	0.00076158	0.00064404	0.00065954	0.00048631	0.00073234	0.00065801	0.00057518	0.00070044	0.00064668	0.00061201	0.00058339	0.00058416	0.00059722	0.00058034	0.0006053	0.00053549	0.00061531
K00701	6.4829e-06	6.6539e-06	6.2257e-06	4.4922e-06	4.7399e-06	3.7888e-06	3.9912e-06	5.5926e-06	5.0379e-06	4.8817e-06	5.8249e-06	6.2011e-06	4.3323e-06	6.5051e-06	6.1987e-06	5.2655e-06	3.5477e-06	4.971e-06	5.3312e-06	4.9248e-06
K00702	6.7776e-06	3.327e-06	5.0398e-06	5.9896e-06	3.5549e-06	5.5375e-06	4.9122e-06	5.2983e-06	3.6385e-06	2.0101e-06	4.6599e-06	7.0869e-06	5.1988e-06	5.3223e-06	5.018e-06	3.3256e-06	6.5041e-06	3.8014e-06	5.3312e-06	2.0279e-06
K00703	0.00031531	0.00040468	0.00029676	0.00040729	0.00038927	0.00042638	0.00032605	0.00036911	0.00030032	0.00034086	0.00041677	0.00037945	0.0004237	0.00035127	0.00035126	0.0003442	0.00035743	0.00028072	0.00033912	0.00035719
K00704	4.1255e-06	5.1417e-06	5.0398e-06	5.0912e-06	4.1474e-06	6.1204e-06	3.9912e-06	4.4152e-06	5.3178e-06	4.5945e-06	4.3686e-06	5.9058e-06	3.7547e-06	4.7309e-06	6.1987e-06	6.3741e-06	5.0259e-06	6.1407e-06	4.4426e-06	4.0557e-06
K00705	0.00065006	0.0005674	0.00046544	0.00066035	0.00061441	0.00049808	0.00047341	0.00072439	0.00061351	0.00049247	0.00056589	0.00051912	0.00050572	0.0004657	0.00053221	0.00056563	0.00042424	0.00057167	0.00040073	0.00051044
K00706	4.7149e-06	4.8392e-06	3.5575e-06	5.0912e-06	5.6286e-06	3.7888e-06	4.9122e-06	5.0039e-06	4.1983e-06	5.456e-06	5.2424e-06	7.0869e-06	7.5093e-06	4.4353e-06	5.9036e-06	3.0485e-06	8.2779e-06	3.509e-06	3.8503e-06	6.663e-06
K00709	4.7149e-06	3.6294e-06	4.7434e-06	4.4922e-06	4.7399e-06	3.7888e-06	5.5262e-06	5.0039e-06	4.1983e-06	5.7431e-06	6.6986e-06	4.1341e-06	3.177e-06	5.618e-06	5.9036e-06	4.7113e-06	3.8433e-06	4.3862e-06	5.9235e-06	3.766e-06
K00710	5.3042e-06	5.4441e-06	5.3363e-06	4.1927e-06	3.5549e-06	4.6631e-06	4.6052e-06	4.4152e-06	3.3586e-06	7.7532e-06	5.5336e-06	4.7246e-06	4.6211e-06	4.7309e-06	4.4277e-06	5.5427e-06	5.6172e-06	6.1407e-06	4.7388e-06	5.2145e-06
K00712	0.00023751	0.00030457	0.00029498	0.00015513	0.00011198	0.00020372	0.00032697	0.00022871	0.00034594	0.0002751	0.00010339	0.00014912	0.00020391	0.00027321	0.00028485	0.00014522	0.0001694	0.00019153	0.00018985	0.00012312
K00713	4.7149e-06	5.7466e-06	5.6327e-06	4.7917e-06	7.7024e-06	6.7032e-06	4.2982e-06	6.1813e-06	3.3586e-06	5.456e-06	4.3686e-06	3.5435e-06	4.9099e-06	5.0266e-06	6.4939e-06	5.8198e-06	5.6172e-06	5.5559e-06	7.7006e-06	4.6351e-06
K00714	5.5989e-06	5.4441e-06	5.3363e-06	5.3906e-06	5.3324e-06	6.1204e-06	8.2893e-06	4.1209e-06	4.4782e-06	4.5945e-06	4.6599e-06	4.4293e-06	6.6429e-06	5.618e-06	5.6084e-06	5.2655e-06	4.7302e-06	6.4331e-06	6.2197e-06	2.6072e-06
K00715	7.6617e-06	3.0245e-06	4.7434e-06	4.1927e-06	3.5549e-06	4.9546e-06	6.4472e-06	5.2983e-06	6.7173e-06	5.456e-06	4.3686e-06	5.9058e-06	3.177e-06	5.9137e-06	5.018e-06	5.2655e-06	5.3215e-06	6.1407e-06	5.035e-06	6.3733e-06
K00716	4.1255e-06	3.9319e-06	5.3363e-06	5.6901e-06	7.7024e-06	4.6631e-06	6.1402e-06	5.0039e-06	7.5569e-06	5.7431e-06	7.8636e-06	5.9058e-06	6.0652e-06	5.3223e-06	6.7891e-06	4.157e-06	6.2084e-06	5.5559e-06	4.7388e-06	6.0836e-06
K00717	2.6521e-06	3.6294e-06	6.5221e-06	4.4922e-06	3.8512e-06	8.1605e-06	5.2192e-06	3.8265e-06	5.0379e-06	7.4661e-06	4.6599e-06	5.6105e-06	6.6429e-06	3.5482e-06	5.018e-06	5.8198e-06	5.6172e-06	5.2635e-06	6.812e-06	3.766e-06
K00718	4.1255e-06	6.049e-06	2.9646e-06	6.888e-06	6.8136e-06	4.6631e-06	4.6052e-06	5.0039e-06	6.1575e-06	4.3074e-06	5.2424e-06	6.7917e-06	4.6211e-06	4.1396e-06	7.3794e-06	5.8198e-06	4.139e-06	6.4331e-06	5.3312e-06	5.7939e-06
K00719	3.8308e-06	4.2343e-06	7.115e-06	7.1875e-06	5.6286e-06	4.0802e-06	5.5262e-06	7.6531e-06	5.5977e-06	6.0303e-06	4.3686e-06	4.1341e-06	4.9099e-06	3.8439e-06	6.1987e-06	3.8799e-06	5.9128e-06	3.509e-06	4.4426e-06	5.2145e-06
K00720	4.2729e-05	1.2098e-05	9.1903e-06	5.3906e-05	5.5694e-05	1.5738e-05	1.8728e-05	3.9443e-05	6.4374e-06	2.9577e-05	5.2715e-05	1.6831e-05	2.6571e-05	3.9917e-05	3.365e-05	5.0992e-05	1.3895e-05	3.8891e-05	3.6133e-05	4.0267e-05
K00721	0.00013997	0.00015879	0.00011681	0.00019107	0.0001185	8.9474e-05	0.00014245	0.00015365	0.00012231	0.00013669	0.00011038	0.00014764	0.00012246	6.5346e-05	0.00012073	0.00011446	6.5336e-05	0.00012194	8.2041e-05	0.00014427
K00722	6.1883e-06	5.7466e-06	4.4469e-06	7.1875e-06	4.1474e-06	9.3263e-06	5.5262e-06	6.4757e-06	4.4782e-06	5.7431e-06	6.6986e-06	5.6105e-06	6.354e-06	4.4353e-06	6.1987e-06	3.0485e-06	5.6172e-06	7.3104e-06	4.1465e-06	4.3454e-06
K00725	5.8936e-06	5.1417e-06	5.9292e-06	5.6901e-06	3.8512e-06	6.4118e-06	5.8332e-06	4.4152e-06	5.0379e-06	5.7431e-06	4.6599e-06	3.8388e-06	6.354e-06	8.8705e-06	4.1325e-06	4.9884e-06	4.7302e-06	4.971e-06	4.1465e-06	6.3733e-06
K00726	5.0096e-06	8.7711e-06	3.854e-06	5.9896e-06	6.8136e-06	5.246e-06	5.5262e-06	4.7096e-06	4.1983e-06	6.3175e-06	5.5336e-06	4.7246e-06	5.1988e-06	3.8439e-06	5.6084e-06	3.0485e-06	3.8433e-06	2.9241e-06	7.1082e-06	6.663e-06
K00727	6.7776e-06	5.4441e-06	5.3363e-06	5.0912e-06	5.9249e-06	4.0802e-06	3.0701e-06	4.4152e-06	4.7581e-06	7.1789e-06	5.5336e-06	5.6105e-06	4.9099e-06	4.7309e-06	5.3132e-06	6.3741e-06	5.0259e-06	4.0938e-06	4.7388e-06	5.2145e-06
K00728	4.4202e-06	5.1417e-06	5.3363e-06	5.3906e-06	5.0362e-06	6.1204e-06	5.2192e-06	6.77e-06	4.1983e-06	6.3175e-06	4.0774e-06	4.7246e-06	4.3323e-06	3.8439e-06	4.7228e-06	3.8799e-06	3.8433e-06	4.971e-06	4.7388e-06	4.6351e-06
K00729	5.0096e-06	6.9564e-06	4.4469e-06	7.1875e-06	6.2211e-06	3.7888e-06	5.5262e-06	5.0039e-06	5.3178e-06	4.3074e-06	3.7862e-06	4.7246e-06	5.7764e-06	4.4353e-06	5.3132e-06	6.0969e-06	3.5477e-06	8.1876e-06	6.5159e-06	5.7939e-06
K00730	5.5989e-06	4.8392e-06	2.6681e-06	6.888e-06	5.3324e-06	3.2059e-06	4.9122e-06	6.1813e-06	6.1575e-06	4.0202e-06	4.0774e-06	5.3152e-06	6.0652e-06	6.2094e-06	6.4939e-06	4.7113e-06	6.2084e-06	2.6317e-06	5.9235e-06	6.3733e-06
K00731	3.8308e-06	2.4196e-06	6.2257e-06	8.6849e-06	7.9986e-06	4.6631e-06	3.3771e-06	6.4757e-06	4.1983e-06	5.7431e-06	6.1161e-06	7.0869e-06	4.0435e-06	5.9137e-06	5.9036e-06	5.8198e-06	5.3215e-06	4.3862e-06	3.8503e-06	4.9248e-06
K00732	3.5362e-06	4.2343e-06	7.708e-06	6.2891e-06	5.0362e-06	4.6631e-06	5.8332e-06	4.7096e-06	3.9184e-06	5.7431e-06	2.6212e-06	4.4293e-06	4.3323e-06	3.8439e-06	5.3132e-06	4.157e-06	4.4346e-06	9.3573e-06	6.5159e-06	6.663e-06
K00733	5.3042e-06	4.8392e-06	8.5973e-06	5.0912e-06	7.1099e-06	3.7888e-06	7.6753e-06	3.8265e-06	3.9184e-06	4.0202e-06	3.7862e-06	6.2011e-06	4.3323e-06	5.618e-06	4.1325e-06	4.9884e-06	5.3215e-06	6.4331e-06	6.2197e-06	4.0557e-06
K00734	4.7149e-06	7.2588e-06	5.0398e-06	5.9896e-06	4.7399e-06	4.0802e-06	6.7543e-06	4.1209e-06	6.4374e-06	2.5844e-06	6.4073e-06	7.9728e-06	4.6211e-06	4.1396e-06	5.6084e-06	7.7597e-06	4.139e-06	4.6786e-06	5.035e-06	6.0836e-06
K00735	7.9563e-06	6.9564e-06	6.2257e-06	6.2891e-06	5.9249e-06	2.9145e-06	4.6052e-06	2.9435e-06	6.1575e-06	4.5945e-06	5.8249e-06	7.3822e-06	4.6211e-06	5.9137e-06	7.0843e-06	2.4942e-06	3.8433e-06	5.2635e-06	5.035e-06	3.766e-06
K00736	7.9563e-06	3.6294e-06	2.9646e-06	4.1927e-06	4.7399e-06	5.5375e-06	4.2982e-06	3.5322e-06	4.1983e-06	5.456e-06	3.4949e-06	6.4964e-06	5.7764e-06	4.1396e-06	4.7228e-06	5.8198e-06	3.8433e-06	4.971e-06	7.4044e-06	5.7939e-06
K00737	4.4202e-06	3.9319e-06	5.0398e-06	5.6901e-06	5.9249e-06	2.623e-06	7.3683e-06	3.8265e-06	2.519e-06	5.1688e-06	6.1161e-06	5.6105e-06	6.0652e-06	6.8007e-06	3.5421e-06	7.2055e-06	5.6172e-06	4.0938e-06	4.7388e-06	5.5042e-06
K00738	5.8936e-06	3.6294e-06	6.5221e-06	4.7917e-06	4.4437e-06	5.5375e-06	7.3683e-06	5.887e-06	5.0379e-06	3.1587e-06	4.3686e-06	4.7246e-06	4.6211e-06	5.618e-06	7.3794e-06	4.7113e-06	7.0954e-06	6.1407e-06	4.4426e-06	2.8969e-06
K00739	5.3042e-06	4.5368e-06	5.9292e-06	4.4922e-06	5.9249e-06	5.8289e-06	5.5262e-06	4.7096e-06	5.8776e-06	6.0303e-06	4.9511e-06	6.4964e-06	3.7547e-06	5.0266e-06	5.6084e-06	8.0369e-06	6.5041e-06	6.7255e-06	4.4426e-06	6.0836e-06
K00741	5.3042e-06	7.2588e-06	5.3363e-06	5.3906e-06	6.8136e-06	5.8289e-06	4.2982e-06	4.7096e-06	2.519e-06	4.3074e-06	3.7862e-06	5.3152e-06	6.354e-06	5.0266e-06	5.6084e-06	2.2171e-06	5.3215e-06	7.3104e-06	5.035e-06	5.2145e-06
K00742	7.9563e-06	3.0245e-06	6.2257e-06	5.9896e-06	5.0362e-06	3.7888e-06	6.1402e-06	5.5926e-06	4.1983e-06	5.1688e-06	5.5336e-06	7.9728e-06	4.0435e-06	4.7309e-06	4.4277e-06	3.0485e-06	2.9564e-06	5.2635e-06	4.1465e-06	3.4763e-06
K00743	6.7776e-06	6.049e-06	4.7434e-06	5.0912e-06	5.3324e-06	6.1204e-06	7.0613e-06	4.4152e-06	4.1983e-06	4.3074e-06	4.9511e-06	4.7246e-06	6.6429e-06	6.5051e-06	5.3132e-06	4.7113e-06	4.139e-06	3.509e-06	3.5541e-06	6.0836e-06
K00744	8.5457e-06	6.9564e-06	4.1504e-06	3.2943e-06	3.5549e-06	5.8289e-06	6.1402e-06	7.0644e-06	5.8776e-06	3.733e-06	4.0774e-06	4.7246e-06	6.354e-06	7.0964e-06	8.8553e-06	5.5427e-06	6.2084e-06	4.6786e-06	5.6273e-06	5.5042e-06
K00745	5.2748e-05	2.3591e-05	2.1938e-05	1.9466e-05	2.7847e-05	5.1003e-05	3.9912e-05	5.8281e-05	6.0455e-05	3.0439e-05	1.2815e-05	2.3918e-05	2.195e-05	1.9219e-05	3.7192e-05	4.8498e-05	1.6851e-05	1.1989e-05	2.2509e-05	1.883e-05
K00746	4.7149e-06	3.327e-06	5.6327e-06	6.5886e-06	5.6286e-06	4.9546e-06	4.6052e-06	7.0644e-06	4.4782e-06	4.3074e-06	5.8249e-06	7.0869e-06	5.4876e-06	5.0266e-06	5.018e-06	3.8799e-06	3.8433e-06	6.7255e-06	4.7388e-06	5.7939e-06
K00747	4.7149e-06	4.5368e-06	4.7434e-06	3.5938e-06	4.7399e-06	6.9947e-06	3.9912e-06	4.4152e-06	6.4374e-06	6.3175e-06	6.4073e-06	5.3152e-06	8.9534e-06	3.8439e-06	6.7891e-06	5.2655e-06	4.139e-06	5.2635e-06	7.1082e-06	5.5042e-06
K00748	0.00027965	0.00017512	0.00023331	0.00019077	0.00023907	0.00022908	0.0002496	0.00021105	0.00020684	0.00020245	0.00022833	0.00019991	0.00013603	0.00023004	0.00019541	0.00025385	0.00026755	0.00025908	0.00020732	0.0002109
K00749	7.0723e-06	6.049e-06	5.0398e-06	2.6953e-06	5.0362e-06	4.0802e-06	4.9122e-06	4.1209e-06	4.1983e-06	4.8817e-06	4.0774e-06	5.3152e-06	4.3323e-06	3.2525e-06	6.7891e-06	4.7113e-06	6.5041e-06	5.8483e-06	4.4426e-06	6.0836e-06
K00750	5.0096e-06	5.7466e-06	5.3363e-06	5.9896e-06	5.0362e-06	5.5375e-06	7.9823e-06	5.887e-06	6.4374e-06	4.8817e-06	4.9511e-06	4.4293e-06	5.4876e-06	7.0964e-06	6.1987e-06	5.2655e-06	5.9128e-06	5.8483e-06	4.7388e-06	5.5042e-06
K00752	5.3042e-06	6.3515e-06	5.9292e-06	5.6901e-06	2.37e-06	3.4973e-06	7.3683e-06	4.7096e-06	4.4782e-06	6.8918e-06	4.3686e-06	5.0199e-06	5.7764e-06	4.7309e-06	7.3794e-06	5.2655e-06	5.9128e-06	8.1876e-06	6.2197e-06	6.9526e-06
K00753	5.0096e-06	5.4441e-06	4.1504e-06	8.3854e-06	5.0362e-06	5.5375e-06	7.9823e-06	4.4152e-06	7.277e-06	4.3074e-06	5.2424e-06	5.9058e-06	4.3323e-06	4.1396e-06	7.6746e-06	3.6027e-06	4.4346e-06	5.2635e-06	5.6273e-06	2.8969e-06
K00754	0.00011581	8.8618e-05	0.00015031	9.9427e-05	9.0651e-05	9.5303e-05	7.3069e-05	0.00012039	9.5721e-05	7.7245e-05	0.00012203	9.213e-05	0.00011986	0.00012005	0.00012191	8.2309e-05	0.00010554	0.00010468	0.00013061	9.9365e-05
K00756	0.00025608	0.00041345	0.00038392	0.00032314	0.00023551	0.00034915	0.00032635	0.00023989	0.0003826	0.00041293	0.00030901	0.00030562	0.00045258	0.00034122	0.00038757	0.00022309	0.00033733	0.00022633	0.00043656	0.00033575
K00757	9.3708e-05	0.00015516	9.7535e-05	0.0001177	0.0001028	9.88e-05	0.00010039	8.2417e-05	9.824e-05	7.2651e-05	9.3198e-05	7.8547e-05	9.0689e-05	9.0184e-05	0.00010508	8.314e-05	9.3422e-05	0.00010264	7.6413e-05	8.1983e-05
K00758	0.00017592	0.00013671	0.00012896	0.00020664	0.00016767	6.3827e-05	4.9429e-05	0.00018956	0.00022307	0.00013353	0.000203	0.00012757	0.00012159	0.00010083	0.00013814	0.00020258	7.7162e-05	0.00019796	0.00010485	0.00017787
K00759	0.00030823	0.00032151	0.00031988	0.00030188	0.00026307	0.00030835	0.00031776	0.00027433	0.00034902	0.00034114	0.0002895	0.00029145	0.00029402	0.00028208	0.00029872	0.0002702	0.00028943	0.00031464	0.00028551	0.00030418
K00760	0.00037984	0.00041859	0.00042097	0.00041328	0.00034868	0.00036285	0.00041846	0.00035557	0.00036077	0.00040173	0.00035794	0.00039716	0.0004468	0.00036369	0.00038314	0.00035307	0.00035595	0.00038189	0.0004259	0.00039138
K00761	0.00038898	0.00038563	0.00036168	0.00034171	0.00032054	0.0003681	0.00039328	0.00033879	0.000384	0.00035033	0.00032532	0.00033338	0.00036276	0.00033324	0.00035097	0.00032896	0.00032609	0.00040938	0.0003643	0.00035169
K00762	0.00038809	0.00037897	0.00040793	0.00037016	0.00032942	0.00037014	0.00040096	0.00036117	0.00040472	0.00038938	0.00038298	0.00036911	0.00038875	0.00036635	0.00038491	0.00035639	0.00036393	0.00036172	0.00039451	0.0003682
K00763	0.00071637	0.00071983	0.00076072	0.00071725	0.00067099	0.0007735	0.00074635	0.00073352	0.00073694	0.00078566	0.00069432	0.00076007	0.00082718	0.00078179	0.00071285	0.00069644	0.00072136	0.00071057	0.00079582	0.00073495
K00764	0.0008089	0.00082418	0.00085232	0.00082627	0.00070802	0.00074814	0.00084582	0.00079827	0.00086233	0.00077676	0.00075199	0.00071903	0.00073187	0.00079835	0.00075536	0.00068701	0.00070835	0.00082549	0.00077687	0.00074538
K00765	0.00028378	0.00029187	0.00027452	0.00030367	0.00025981	0.00022179	0.00029596	0.00026285	0.00028744	0.00029347	0.00026649	0.00027728	0.00027756	0.00026937	0.00029193	0.00025108	0.00027258	0.00027721	0.0002636	0.00028998
K00766	0.000465	0.00041708	0.00042246	0.00043095	0.0003549	0.0004089	0.00048753	0.00039884	0.0004008	0.00046031	0.00039376	0.00042138	0.0003977	0.00037138	0.0003855	0.00035418	0.00038877	0.00038014	0.00037881	0.00041745
K00767	0.00025107	0.00024952	0.00025229	0.00020484	0.00025329	0.00027338	0.00028644	0.00025697	0.00024378	0.00027366	0.00022892	0.00023357	0.00022326	0.00021289	0.00025238	0.00026854	0.00027199	0.00019943	0.00022184	0.00025319
K00768	0.00020215	0.00019871	0.00017995	0.00025576	0.00026425	0.00018857	0.00026188	0.00020369	0.00015394	0.00014157	0.00025105	0.00027108	0.00018975	0.00018687	0.00021282	0.00022475	0.00021641	0.00021288	0.00019311	0.00022538
K00769	5.2158e-05	5.2022e-05	4.4469e-05	4.7617e-05	6.0138e-05	3.6722e-05	2.1184e-05	3.0612e-05	5.8776e-05	4.5084e-05	6.2909e-05	3.1596e-05	3.0326e-05	3.5778e-05	5.4903e-05	6.5126e-05	4.1685e-05	4.4739e-05	3.5837e-05	6.0546e-05
K00770	7.0723e-06	5.1417e-06	6.2257e-06	5.0912e-06	5.3324e-06	4.0802e-06	5.8332e-06	5.887e-06	4.7581e-06	5.456e-06	4.9511e-06	6.2011e-06	3.7547e-06	4.1396e-06	4.7228e-06	6.0969e-06	3.8433e-06	4.0938e-06	5.035e-06	6.3733e-06
K00771	4.7149e-06	6.6539e-06	7.708e-06	3.5938e-06	5.3324e-06	3.4973e-06	5.8332e-06	5.2983e-06	4.4782e-06	6.6046e-06	3.4949e-06	6.2011e-06	4.9099e-06	5.618e-06	4.4277e-06	4.7113e-06	4.7302e-06	7.3104e-06	7.9967e-06	4.6351e-06
K00772	4.8917e-05	1.0888e-05	2.0159e-05	4.8815e-05	7.9394e-05	5.4792e-05	2.3947e-05	7.4176e-05	8.3966e-06	4.5371e-05	5.6792e-05	4.2817e-05	3.6969e-05	6.8599e-05	2.9813e-05	6.3463e-05	6.8293e-05	4.6201e-05	4.9461e-05	4.4323e-05
K00773	0.00065183	0.00064785	0.00062553	0.00060375	0.00054716	0.00059222	0.00062047	0.00061136	0.00068684	0.00063318	0.00060142	0.00058024	0.00058342	0.00055884	0.00061397	0.00060886	0.00054073	0.00059594	0.00056303	0.00061792
K00774	4.1255e-06	4.5368e-06	5.3363e-06	3.8932e-06	4.1474e-06	6.1204e-06	8.2893e-06	5.2983e-06	6.4374e-06	5.456e-06	6.9898e-06	4.4293e-06	5.4876e-06	5.9137e-06	4.4277e-06	3.0485e-06	4.139e-06	4.971e-06	5.035e-06	6.0836e-06
K00775	2.3574e-06	4.8392e-06	5.3363e-06	4.1927e-06	5.3324e-06	5.5375e-06	7.6753e-06	5.5926e-06	4.4782e-06	4.3074e-06	5.2424e-06	7.6775e-06	3.177e-06	6.2094e-06	7.9698e-06	5.2655e-06	3.5477e-06	4.6786e-06	5.9235e-06	4.0557e-06
K00776	6.7776e-06	4.5368e-06	3.5575e-06	3.2943e-06	5.6286e-06	6.1204e-06	7.6753e-06	4.1209e-06	2.519e-06	5.456e-06	4.3686e-06	5.3152e-06	4.9099e-06	5.0266e-06	5.018e-06	5.8198e-06	3.8433e-06	5.5559e-06	3.5541e-06	5.7939e-06
K00777	4.4202e-06	5.4441e-06	4.4469e-06	5.6901e-06	5.3324e-06	5.5375e-06	6.4472e-06	6.1813e-06	7.5569e-06	6.0303e-06	3.7862e-06	7.3822e-06	5.7764e-06	7.0964e-06	4.7228e-06	6.9283e-06	4.4346e-06	3.509e-06	6.812e-06	4.6351e-06
K00778	3.8308e-06	6.3515e-06	5.6327e-06	5.9896e-06	3.8512e-06	4.3717e-06	3.3771e-06	4.7096e-06	5.5977e-06	6.8918e-06	5.5336e-06	6.7917e-06	6.6429e-06	5.3223e-06	8.5602e-06	4.9884e-06	3.8433e-06	4.0938e-06	4.4426e-06	5.7939e-06
K00779	4.4202e-06	3.6294e-06	6.2257e-06	5.0912e-06	5.0362e-06	5.8289e-06	4.6052e-06	8.8304e-06	4.7581e-06	7.1789e-06	4.6599e-06	2.9529e-06	6.0652e-06	6.2094e-06	5.9036e-06	4.157e-06	3.8433e-06	3.509e-06	4.7388e-06	4.0557e-06
K00780	4.7149e-06	4.8392e-06	3.5575e-06	7.487e-06	5.9249e-06	4.9546e-06	5.2192e-06	5.2983e-06	4.7581e-06	4.0202e-06	3.2037e-06	7.6775e-06	8.3758e-06	5.0266e-06	3.8373e-06	3.8799e-06	3.252e-06	4.6786e-06	4.7388e-06	4.9248e-06
K00781	5.3042e-06	5.4441e-06	5.6327e-06	4.1927e-06	7.7024e-06	7.5776e-06	5.2192e-06	4.4152e-06	4.4782e-06	4.0202e-06	5.2424e-06	5.6105e-06	4.6211e-06	5.3223e-06	5.6084e-06	5.8198e-06	3.252e-06	6.1407e-06	3.5541e-06	3.1866e-06
K00782	0.00016944	0.00019357	0.00022057	0.00016412	0.00014457	0.00014019	0.00013754	0.00014335	0.00023594	0.00017631	0.0002097	0.0001382	0.00015741	0.00013808	0.0001712	0.00015021	0.00017058	0.00020001	0.00015964	0.00021582
K00783	0.00026698	0.00025618	0.00028905	0.00020934	0.00022781	0.00029115	0.00029013	0.00021841	0.00024378	0.00025155	0.00022367	0.00025543	0.00028449	0.00026789	0.00026655	0.00022836	0.00024715	0.00023949	0.00026834	0.00024479
K00784	0.00036039	0.0004443	0.00042275	0.00038483	0.00035075	0.00040423	0.00046512	0.00031171	0.0003896	0.00038967	0.00034745	0.00039775	0.00046298	0.00036606	0.00044719	0.00031843	0.0003323	0.0003506	0.00040843	0.00035806
K00785	5.5105e-05	8.1662e-06	5.0695e-05	2.0964e-05	8.2949e-06	7.5776e-06	7.7367e-05	8.8304e-06	3.3306e-05	5.456e-05	2.4464e-05	2.3033e-05	3.7258e-05	4.3761e-05	1.9187e-05	3.2147e-05	3.3999e-05	4.4155e-05	2.7248e-05	6.0836e-05
K00786	3.0647e-05	6.9261e-05	3.7057e-05	5.0612e-05	4.4437e-05	4.4591e-05	5.5262e-05	4.8567e-05	1.8472e-05	4.0202e-05	2.3299e-05	5.64e-05	6.4407e-05	3.9622e-05	4.6048e-05	4.4896e-05	1.4782e-05	3.9768e-05	1.8363e-05	4.2585e-05
K00787	5.8936e-06	5.1417e-06	6.2257e-06	3.5938e-06	5.6286e-06	5.246e-06	6.4472e-06	5.5926e-06	3.9184e-06	6.8918e-06	5.2424e-06	4.7246e-06	4.6211e-06	3.8439e-06	3.5421e-06	2.4942e-06	4.7302e-06	4.3862e-06	4.4426e-06	6.3733e-06
K00788	0.00038249	0.00036143	0.00033589	0.00038992	0.00034424	0.00034886	0.00037732	0.00037	0.00036777	0.00038824	0.00036056	0.00035169	0.00036449	0.00031816	0.00039377	0.00041653	0.00029032	0.00034534	0.00031928	0.00039167
K00789	0.00081597	0.0007897	0.00084313	0.00078344	0.00070417	0.00070209	0.00079731	0.0007709	0.00080607	0.00081696	0.00073947	0.00074944	0.00082776	0.00070166	0.00083063	0.00073025	0.00068943	0.00076291	0.0007511	0.00076334
K00790	0.001039	0.0011508	0.0011096	0.00098858	0.00086592	0.0011011	0.0010752	0.00094133	0.0011632	0.0011142	0.00092499	0.00092278	0.001185	0.00097605	0.0010992	0.00096137	0.00088899	0.00097549	0.0010298	0.00093079
K00791	0.0005979	0.00055984	0.00060448	0.00052649	0.00048169	0.00058843	0.0005824	0.00053601	0.00058524	0.00052492	0.00052948	0.00051085	0.00054269	0.00052277	0.00056054	0.00051547	0.00054871	0.00058804	0.00053282	0.00050957
K00793	0.0002823	0.00030638	0.00030061	0.00027043	0.00025981	0.0002693	0.00028982	0.00026845	0.00026589	0.00024437	0.00024144	0.00027728	0.00025243	0.00027676	0.00030462	0.00025635	0.00025868	0.00026727	0.0002248	0.00027202
K00794	0.00024989	0.00024287	0.00023005	0.00021143	0.00019493	0.00021684	0.00024438	0.00020339	0.00021495	0.00020848	0.00019106	0.00021704	0.00019726	0.00023152	0.00023349	0.00022309	0.00020488	0.00021522	0.00019281	0.00022133
K00795	0.00015559	7.894e-05	0.00012155	0.00010602	0.00013124	0.00010638	0.00013816	8.801e-05	0.0001405	0.00012319	0.00013718	9.9808e-05	9.9932e-05	0.00011502	0.00013224	0.00016628	0.00011885	0.00013977	0.00011521	0.00014514
K00796	0.00054781	0.00045761	0.0005022	0.00044353	0.0004257	0.00049983	0.0004992	0.00048391	0.00052227	0.00048443	0.00046104	0.00049254	0.00045114	0.00047812	0.00049678	0.00048997	0.00043607	0.0004778	0.00042886	0.00045395
K00797	0.00025195	0.00019448	0.00020189	0.00017669	0.00022959	0.0002454	0.000206	0.00027109	0.00021243	0.00024724	0.00021144	0.00021822	0.00017936	0.00018953	0.00017858	0.00025081	0.00026785	0.00018247	0.000178	0.00022625
K00798	0.00013909	9.376e-05	0.00010258	0.00015573	0.00017864	0.00013698	0.00013447	0.00017455	0.00011139	0.00011716	0.00015465	0.00019194	0.00011495	0.00014282	0.00013696	0.00017293	0.00013452	0.00014211	0.00011462	0.00016194
K00799	0.00047561	0.00014336	0.00026237	0.00032464	0.00059753	0.00056016	0.00042398	0.00057516	0.0002824	0.00032018	0.00040308	0.00054127	0.00028044	0.00057126	0.00035598	0.00058503	0.00051441	0.00052635	0.00045818	0.00032156
K00800	0.00062678	0.00070441	0.00067652	0.00065227	0.00047458	0.00054384	0.00058455	0.00052924	0.00070251	0.00065156	0.00059326	0.00050199	0.00064782	0.00052218	0.00062932	0.00056979	0.00049106	0.00058746	0.00056066	0.00064109
K00801	5.8936e-06	4.5368e-06	3.5575e-06	3.5938e-06	5.0362e-06	5.246e-06	4.2982e-06	4.7096e-06	4.7581e-06	5.1688e-06	5.8249e-06	5.0199e-06	4.6211e-06	4.7309e-06	6.4939e-06	6.9283e-06	4.7302e-06	3.8014e-06	4.1465e-06	4.6351e-06
K00802	4.4202e-06	3.9319e-06	5.0398e-06	4.1927e-06	3.8512e-06	8.4519e-06	5.2192e-06	5.0039e-06	4.7581e-06	4.8817e-06	5.8249e-06	7.6775e-06	4.0435e-06	3.2525e-06	5.9036e-06	4.4341e-06	5.3215e-06	6.4331e-06	3.5541e-06	4.3454e-06
K00803	3.8898e-05	8.7711e-06	1.8973e-05	2.4258e-05	6.9618e-05	8.6559e-05	2.4868e-05	9.272e-05	4.7581e-06	4.1351e-05	2.6212e-05	7.5004e-05	2.3106e-05	6.3572e-05	1.0036e-05	5.0992e-05	9.3127e-05	4.4739e-05	3.8799e-05	3.2735e-05
K00804	7.367e-06	5.4441e-06	4.4469e-06	5.6901e-06	7.4061e-06	4.3717e-06	5.5262e-06	3.5322e-06	4.1983e-06	6.8918e-06	4.0774e-06	5.9058e-06	5.1988e-06	3.2525e-06	5.9036e-06	4.157e-06	3.5477e-06	4.971e-06	3.8503e-06	5.5042e-06
K00805	0.00031796	0.00050177	0.0004776	0.00038962	0.00028439	0.0003885	0.00035276	0.00034615	0.00047749	0.00048731	0.00033697	0.0003257	0.0004907	0.0003699	0.00040557	0.00037274	0.00033466	0.00041113	0.00047447	0.0003795
K00806	0.00047679	0.00042041	0.00045388	0.00041388	0.00040615	0.00041414	0.00044885	0.00041415	0.00047441	0.00045457	0.00037658	0.00039126	0.00044363	0.00039208	0.00044424	0.00042762	0.00036482	0.00045353	0.00040783	0.00038442
K00807	5.0096e-06	5.1417e-06	6.5221e-06	2.0964e-06	5.3324e-06	4.9546e-06	3.3771e-06	5.2983e-06	5.8776e-06	5.1688e-06	5.5336e-06	7.0869e-06	6.9317e-06	5.9137e-06	5.018e-06	5.2655e-06	5.3215e-06	4.0938e-06	3.8503e-06	5.7939e-06
K00808	7.0723e-06	7.2588e-06	5.6327e-06	5.3906e-06	7.1099e-06	2.9145e-06	6.7543e-06	4.7096e-06	6.1575e-06	5.456e-06	6.1161e-06	6.7917e-06	3.4658e-06	3.5482e-06	4.1325e-06	6.3741e-06	4.139e-06	3.509e-06	5.9235e-06	4.0557e-06
K00809	4.1255e-06	3.9319e-06	5.6327e-06	5.3906e-06	4.4437e-06	3.4973e-06	6.1402e-06	4.4152e-06	4.1983e-06	8.3276e-06	6.6986e-06	8.8587e-06	4.9099e-06	6.8007e-06	3.247e-06	5.5427e-06	3.8433e-06	4.971e-06	5.9235e-06	5.2145e-06
K00810	4.7149e-06	6.3515e-06	5.3363e-06	7.487e-06	6.5174e-06	6.4118e-06	6.1402e-06	4.4152e-06	3.9184e-06	5.1688e-06	6.9898e-06	7.9728e-06	5.7764e-06	5.618e-06	2.9518e-06	4.9884e-06	5.3215e-06	4.3862e-06	2.9618e-06	4.6351e-06
K00811	5.3632e-05	6.9261e-05	6.6407e-05	4.4623e-05	3.6142e-05	4.1385e-05	5.5569e-05	4.5624e-05	3.7505e-05	1.8665e-05	3.757e-05	1.8899e-05	6.0652e-06	5.4406e-05	3.4536e-05	8.5911e-06	6.0606e-05	4.5032e-05	5.1535e-05	2.4334e-05
K00812	0.0002882	0.00032937	0.00027393	0.00039921	0.00033861	0.00028183	0.00033157	0.00026786	0.00018528	0.00029491	0.00036493	0.00031124	0.00031597	0.00028829	0.00034004	0.00030762	0.00027938	0.00027692	0.00030388	0.00038211
K00813	7.4849e-05	6.8052e-05	8.4195e-05	6.0794e-05	5.6583e-05	3.0602e-05	7.6753e-05	2.6197e-05	0.00011167	8.0404e-05	8.912e-05	5.4038e-05	7.596e-05	6.2094e-05	6.5234e-05	9.2562e-05	7.4206e-05	8.6555e-05	7.0786e-05	0.00010864
K00814	6.1883e-06	3.6294e-06	6.8186e-06	5.3906e-06	2.9624e-06	6.9947e-06	5.8332e-06	4.7096e-06	5.5977e-06	4.0202e-06	3.7862e-06	7.3822e-06	5.4876e-06	7.3921e-06	5.6084e-06	6.3741e-06	3.5477e-06	5.5559e-06	6.5159e-06	4.9248e-06
K00815	6.4829e-06	6.6539e-06	5.3363e-06	4.4922e-06	6.5174e-06	3.4973e-06	6.4472e-06	4.7096e-06	4.7581e-06	5.1688e-06	6.6986e-06	5.3152e-06	6.9317e-06	5.9137e-06	5.6084e-06	4.9884e-06	6.5041e-06	6.7255e-06	7.1082e-06	5.2145e-06
K00816	5.3042e-06	3.6294e-06	3.854e-06	5.3906e-06	5.3324e-06	4.0802e-06	7.3683e-06	5.887e-06	5.3178e-06	4.8817e-06	6.9898e-06	4.7246e-06	4.6211e-06	5.3223e-06	6.1987e-06	4.7113e-06	4.7302e-06	4.971e-06	5.6273e-06	5.5042e-06
K00817	0.00065714	0.00065813	0.00068808	0.00076307	0.0006867	0.00062748	0.00070736	0.00071821	0.00062471	0.00071416	0.00067918	0.00076775	0.00073187	0.00069042	0.00070341	0.00063935	0.00065602	0.00063805	0.00065958	0.00074509
K00818	0.00025932	0.00032483	0.00030031	0.00029738	0.00019671	0.00020343	0.0002278	0.00025432	0.00026225	0.00033856	0.00026358	0.00024686	0.00028766	0.00029982	0.00026418	0.00016822	0.00028352	0.00022867	0.0003332	0.00024508
K00819	0.00016237	0.00033875	0.00033411	0.00021832	0.00017241	0.00019498	0.00030456	0.00014276	0.0002435	0.00019441	0.00020707	0.00019341	0.00023683	0.00028474	0.00026507	7.5657e-05	0.000251	0.00016843	0.00024642	0.00020597
K00820	0.0011248	0.0010359	0.0010874	0.00099397	0.00090621	0.0010119	0.0010801	0.00099195	0.0010876	0.0010292	0.0010138	0.00094995	0.0010097	0.00098492	0.0010249	0.00098549	0.00092092	0.0010553	0.0010076	0.00098872
K00821	0.0002213	0.00018843	0.00017017	0.00027343	0.00027373	0.00022937	0.00027631	0.00024372	0.00013798	0.00023202	0.00027406	0.00029736	0.00024954	0.00022975	0.00020367	0.0002896	0.00028174	0.00022779	0.00021976	0.00033083
K00822	0.00011993	1.7542e-05	5.1288e-05	5.1511e-05	0.00013479	0.00019031	0.00010745	0.00019044	3.3306e-05	7.2938e-05	6.2035e-05	0.00015621	4.4189e-05	0.00015819	4.5753e-05	0.00013413	0.00020074	0.00012047	0.00010396	5.5042e-05
K00823	0.00020745	0.00027826	0.00022323	0.00023689	0.00022011	0.00019585	0.00031039	0.00019044	0.00024994	0.00019584	0.00025251	0.00024007	0.00021777	0.00025488	0.00029134	0.0002109	0.00020695	0.0002775	0.00022095	0.00024392
K00824	0.00017386	0.00025224	0.00020219	0.00025546	0.00020263	0.00011862	0.00017254	0.00017985	0.00013267	0.00024293	0.00019921	0.00017422	0.00027525	0.00022176	0.00022227	0.00016462	0.00017472	0.00015235	0.00022598	0.00022393
K00825	5.5989e-06	6.3515e-06	4.7434e-06	5.3906e-06	3.2587e-06	4.9546e-06	5.2192e-06	8.8304e-06	3.0787e-06	4.8817e-06	4.0774e-06	4.4293e-06	4.3323e-06	5.0266e-06	5.6084e-06	6.3741e-06	6.5041e-06	5.5559e-06	4.7388e-06	4.6351e-06
K00826	0.00067865	0.00067416	0.00060596	0.00066784	0.0006236	0.00061204	0.00063582	0.0006355	0.00065885	0.00069578	0.00062763	0.00060623	0.0006975	0.00061709	0.00067389	0.00063325	0.0005425	0.0006243	0.00059591	0.0006521
K00827	4.7149e-06	6.3515e-06	5.0398e-06	2.6953e-06	8.5911e-06	5.5375e-06	5.2192e-06	4.7096e-06	6.7173e-06	3.1587e-06	2.9124e-06	6.2011e-06	6.354e-06	2.0698e-06	5.3132e-06	4.4341e-06	4.139e-06	4.6786e-06	6.812e-06	5.2145e-06
K00829	4.1255e-06	6.6539e-06	5.6327e-06	5.3906e-06	5.6286e-06	5.246e-06	7.6753e-06	4.7096e-06	2.519e-06	4.3074e-06	5.5336e-06	3.8388e-06	5.1988e-06	5.9137e-06	6.4939e-06	4.4341e-06	5.0259e-06	6.1407e-06	3.5541e-06	4.0557e-06
K00830	5.7757e-05	6.4725e-05	5.3956e-05	0.00012009	8.5615e-05	6.2078e-05	8.32e-05	5.0628e-05	1.9032e-05	4.4222e-05	0.00012203	8.8292e-05	8.5779e-05	7.0373e-05	7.1433e-05	6.7898e-05	4.9668e-05	7.2226e-05	5.6866e-05	0.0001124
K00831	0.00041786	0.00031969	0.00033945	0.00042137	0.00038008	0.00029057	0.00034662	0.00039502	0.00034454	0.00039398	0.00037978	0.00037797	0.00037489	0.00031668	0.00031997	0.00038217	0.00034826	0.00037926	0.00034119	0.00040152
K00832	0.00021895	6.7144e-05	0.00014378	0.00015633	0.00024825	0.00022878	0.00021184	0.00024225	0.00015114	0.00018407	0.00018698	0.00024332	0.00013488	0.00025222	0.00012929	0.00027492	0.0002578	0.00024943	0.0001934	0.00020076
K00833	0.00037071	0.00030971	0.00042512	0.00025935	0.00029002	0.00033166	0.00035306	0.00032143	0.00040639	0.00038479	0.00029882	0.00033929	0.00030182	0.00038232	0.00035835	0.0003575	0.00039409	0.00034622	0.00030476	0.00033373
K00835	7.6911e-05	6.5027e-05	9.8721e-05	6.2292e-05	5.5398e-05	2.5647e-05	8.9647e-05	3.0907e-05	0.00012287	8.2414e-05	8.6499e-05	5.6991e-05	7.827e-05	7.333e-05	6.4054e-05	9.3671e-05	8.1301e-05	9.0356e-05	7.4636e-05	0.00010892
K00836	8.8109e-05	1.3913e-05	4.2097e-05	3.8034e-05	0.00013035	0.00015359	0.00010715	0.00014452	3.9184e-05	5.3411e-05	5.5045e-05	0.00012845	3.9568e-05	0.00010999	6.1102e-05	0.00010226	0.00011766	0.00010088	8.5299e-05	5.0407e-05
K00837	0.00012141	0.00019841	0.00017936	0.00026175	0.00022485	0.00010492	9.0568e-05	0.00013422	7.5289e-05	0.00016942	0.00029386	0.000163	0.00022297	0.00022916	0.00016235	0.0001333	0.00019926	0.00013217	0.0002168	0.00023523
K00838	5.3042e-06	3.6294e-06	2.9646e-06	3.8932e-06	8.5911e-06	3.2059e-06	6.4472e-06	5.0039e-06	6.4374e-06	5.456e-06	3.7862e-06	7.3822e-06	6.0652e-06	3.5482e-06	4.1325e-06	6.3741e-06	5.3215e-06	5.2635e-06	6.5159e-06	3.766e-06
K00839	0.00012229	0.00015969	0.00015979	6.6185e-05	6.4285e-05	9.1514e-05	0.00012833	6.564e-05	0.00016625	0.00014559	6.9316e-05	7.3527e-05	8.7801e-05	0.0001097	0.00013962	7.926e-05	0.00011796	9.7374e-05	8.2337e-05	7.0396e-05
K00840	5.7168e-05	4.809e-05	5.8699e-05	4.612e-05	8.5318e-05	5.4209e-05	5.7104e-05	5.1511e-05	0.00010412	3.5033e-05	8.0674e-05	7.9433e-05	4.3034e-05	6.5051e-05	7.9403e-05	8.7851e-05	5.8537e-05	8.0999e-05	6.4566e-05	6.4602e-05
K00841	0.00026285	0.00029791	0.0003181	0.00021533	0.00017538	0.00034682	0.00024592	0.00022753	0.00029108	0.00031874	0.00022134	0.00020552	0.00031684	0.00026405	0.00027363	0.00021284	0.00025898	0.00027516	0.00032698	0.00017961
K00842	5.8936e-06	6.9564e-06	5.6327e-06	4.7917e-06	2.37e-06	5.5375e-06	5.5262e-06	4.4152e-06	5.8776e-06	4.0202e-06	4.9511e-06	4.1341e-06	6.0652e-06	5.9137e-06	6.1987e-06	3.0485e-06	3.5477e-06	4.971e-06	4.1465e-06	5.2145e-06
K00843	6.1883e-06	6.3515e-06	5.3363e-06	4.4922e-06	4.7399e-06	5.8289e-06	6.1402e-06	5.5926e-06	5.0379e-06	4.5945e-06	5.8249e-06	4.7246e-06	3.4658e-06	5.618e-06	6.4939e-06	4.9884e-06	4.7302e-06	3.509e-06	6.812e-06	2.8969e-06
K00844	5.8936e-06	4.2343e-06	5.6327e-06	5.0912e-06	5.3324e-06	4.6631e-06	7.6753e-06	4.1209e-06	4.4782e-06	6.0303e-06	4.6599e-06	5.3152e-06	5.1988e-06	4.7309e-06	7.3794e-06	4.4341e-06	6.5041e-06	4.3862e-06	5.6273e-06	6.0836e-06
K00845	0.00068837	0.00071409	0.00064391	0.00070977	0.00054924	0.00056016	0.00061249	0.00061901	0.00067648	0.00068803	0.00063666	0.00063635	0.00065591	0.0005204	0.00060275	0.00056369	0.00056852	0.00065267	0.00058584	0.00065992
K00846	5.5989e-06	6.049e-06	4.1504e-06	5.0912e-06	5.6286e-06	5.246e-06	6.7543e-06	6.1813e-06	5.3178e-06	5.1688e-06	6.1161e-06	6.4964e-06	3.7547e-06	5.9137e-06	5.9036e-06	4.7113e-06	3.5477e-06	5.8483e-06	5.035e-06	3.1866e-06
K00847	0.00048946	0.00056316	0.00046959	0.00053607	0.00041711	0.0004768	0.00052468	0.00047802	0.00048168	0.00045084	0.00043599	0.00042846	0.0004442	0.00040065	0.00045959	0.0003672	0.00039438	0.00051348	0.00042383	0.00040847
K00848	0.00029232	0.00039591	0.00029379	0.00036237	0.00028084	0.00020897	0.00026311	0.00030936	0.0004383	0.00030037	0.00032561	0.00024893	0.00024088	0.00015257	0.00023732	0.00022836	0.00022469	0.00035207	0.00025915	0.00029114
K00849	0.00043966	0.00030094	0.00034982	0.00036956	0.00034246	0.00028941	0.00030916	0.00039001	0.0004912	0.00030008	0.00033464	0.0002947	0.00032001	0.0002534	0.0004103	0.00034752	0.00023001	0.00037517	0.00031424	0.00030794
K00850	0.00083836	0.00090191	0.00085232	0.00092479	0.00072343	0.00063389	0.00077735	0.00080975	0.00093874	0.00070756	0.00076626	0.00071814	0.0007232	0.00062419	0.00086753	0.00068978	0.00058566	0.00077811	0.00064774	0.0007645
K00851	0.00033535	0.00049058	0.00054163	0.00035788	0.00035964	0.0003952	0.00038653	0.00030936	0.00045677	0.00044682	0.00041473	0.00039096	0.00048146	0.00048817	0.00042919	0.00031482	0.00046888	0.0004088	0.00055385	0.00041513
K00852	0.00048828	0.00049814	0.00050902	0.00052229	0.00053117	0.00045087	0.00041754	0.00046301	0.00055977	0.00044308	0.00056443	0.00044293	0.00049937	0.00052277	0.00052866	0.00050743	0.00039527	0.00057225	0.00052186	0.00050407
K00853	0.00019243	0.0002589	0.00026533	0.00020544	0.00014605	0.00011774	0.00018697	0.00020163	0.00036021	0.00020015	0.00017242	0.00018308	0.00018831	0.00020107	0.0002813	0.00022503	0.00014812	0.00020323	0.00016615	0.00021495
K00854	0.00033564	0.00042404	0.00029765	0.00038932	0.00034957	0.00021946	0.00027201	0.00036617	0.00034062	0.00032908	0.00035677	0.00032305	0.00028535	0.00034004	0.00027511	0.00025164	0.00037576	0.00036113	0.00028699	0.00030157
K00855	8.1921e-05	5.2324e-05	4.1504e-05	0.00010961	0.00012383	3.235e-05	3.0087e-05	7.2115e-05	6.8852e-05	6.1452e-05	0.00012815	4.4589e-05	7.9425e-05	7.8948e-05	7.6746e-05	0.00012055	5.1441e-05	9.1233e-05	7.5525e-05	9.5599e-05
K00856	5.0096e-06	4.5368e-06	5.0398e-06	3.8932e-06	4.1474e-06	6.4118e-06	4.6052e-06	5.5926e-06	4.7581e-06	5.1688e-06	4.6599e-06	5.9058e-06	4.9099e-06	6.5051e-06	5.018e-06	4.9884e-06	4.7302e-06	7.3104e-06	2.6656e-06	4.0557e-06
K00857	0.00024517	0.00030759	0.00028846	0.00026264	0.00020885	0.00024715	0.00026219	0.0002084	0.0002824	0.00024494	0.00023503	0.00023328	0.00028738	0.0002401	0.00028278	0.00020175	0.0002099	0.00022955	0.00026004	0.00024334
K00858	0.00052659	0.00049784	0.00054104	0.00046569	0.00039726	0.00047506	0.00045039	0.00045683	0.00053346	0.00053641	0.00043366	0.00041783	0.0005037	0.00046186	0.00046933	0.00046752	0.00046209	0.0004512	0.00051535	0.0004583
K00859	0.00035568	0.00036536	0.00036435	0.00032194	0.00030098	0.00035294	0.00035552	0.00033585	0.00038092	0.00033999	0.0003425	0.00032925	0.00032839	0.00032496	0.00033886	0.00033062	0.00033319	0.00035996	0.00032105	0.00032359
K00860	8.1626e-05	0.0001482	0.00012896	0.0001165	9.4206e-05	9.9966e-05	0.0001007	9.5663e-05	0.00011335	9.7059e-05	0.00011533	0.00011664	9.3e-05	0.00012419	9.121e-05	6.5403e-05	0.0001629	0.00011492	0.00011817	0.00011298
K00861	6.4829e-06	2.7221e-06	4.4469e-06	4.1927e-06	7.1099e-06	4.6631e-06	6.1402e-06	5.5926e-06	6.1575e-06	4.0202e-06	4.9511e-06	5.6105e-06	4.3323e-06	6.8007e-06	5.3132e-06	4.157e-06	5.0259e-06	5.5559e-06	4.1465e-06	3.1866e-06
K00862	4.4202e-06	4.8392e-06	5.0398e-06	7.7865e-06	4.4437e-06	4.9546e-06	6.1402e-06	6.1813e-06	4.4782e-06	5.7431e-06	5.5336e-06	6.4964e-06	5.1988e-06	6.2094e-06	7.0843e-06	8.0369e-06	4.4346e-06	5.8483e-06	3.2579e-06	3.4763e-06
K00863	0.00014292	0.00019871	0.00022709	0.00019945	0.00015168	8.5394e-05	3.285e-05	0.00019751	0.00018808	0.00019814	0.00021931	0.00015562	0.00016607	0.00017268	0.00017415	0.00010115	0.00015787	0.0001155	0.00017356	0.0001799
K00864	0.00072079	0.00084838	0.00073967	0.00082028	0.00074298	0.00087579	0.0007795	0.00093985	0.00078424	0.00078911	0.00069724	0.00083508	0.00077981	0.00079391	0.00070134	0.00080369	0.00078374	0.00077051	0.00074162	0.00076711
K00865	0.00066362	0.00071711	0.00074797	0.00062052	0.00054687	0.00064963	0.00070214	0.00063314	0.00085197	0.00071387	0.00054754	0.00059471	0.00072407	0.00065051	0.00068009	0.00062632	0.0006102	0.00071203	0.00068387	0.00060662
K00866	7.9563e-06	5.4441e-06	3.2611e-06	5.3906e-06	5.3324e-06	5.246e-06	7.0613e-06	5.887e-06	4.4782e-06	5.1688e-06	5.2424e-06	4.4293e-06	5.4876e-06	5.9137e-06	6.4939e-06	5.2655e-06	4.4346e-06	4.3862e-06	4.7388e-06	5.7939e-06
K00867	0.00026492	0.00023259	0.00025466	0.0002327	0.00019345	0.00026288	0.00017622	0.00026668	0.00033194	0.00025471	0.0002263	0.00018308	0.0002634	0.00018717	0.00022758	0.00026882	0.00014664	0.00026697	0.00022657	0.00020423
K00868	0.00048033	0.00047908	0.00054104	0.00047138	0.00045533	0.00047622	0.00044578	0.0004374	0.00057629	0.00044567	0.00047997	0.00045711	0.0005193	0.00044648	0.00053722	0.00048886	0.00043903	0.0004778	0.00050883	0.00046351
K00869	0.0002213	0.00021172	0.00025377	0.00015663	0.00014575	0.00026638	0.00024837	0.00017367	0.0002547	0.00023547	0.00013688	0.00016182	0.00025994	0.00020846	0.0002205	0.00018651	0.00016704	0.00021346	0.00025856	0.0001434
K00870	7.0723e-06	5.1417e-06	5.6327e-06	6.5886e-06	5.6286e-06	3.4973e-06	6.1402e-06	5.2983e-06	6.1575e-06	5.456e-06	3.7862e-06	4.7246e-06	4.9099e-06	6.5051e-06	3.8373e-06	6.3741e-06	4.4346e-06	4.3862e-06	4.1465e-06	6.3733e-06
K00871	7.0723e-06	3.0245e-06	5.6327e-06	5.6901e-06	5.0362e-06	4.0802e-06	5.2192e-06	6.4757e-06	4.4782e-06	6.0303e-06	4.9511e-06	4.4293e-06	3.4658e-06	8.5748e-06	4.4277e-06	4.157e-06	3.252e-06	4.6786e-06	3.5541e-06	6.0836e-06
K00872	0.00035921	0.00043523	0.00044321	0.00035608	0.00030365	0.0003678	0.00035705	0.00032378	0.00045677	0.00038824	0.00036697	0.00033456	0.00044247	0.00030544	0.00040144	0.00032702	0.00029889	0.00037049	0.00034741	0.00037399
K00873	0.00094916	0.0010613	0.00099551	0.0010658	0.00099005	0.00093641	0.00094283	0.00097164	0.00095301	0.0010312	0.0010237	0.00096678	0.0010943	0.00098049	0.0010107	0.0009805	0.00093274	0.00099187	0.0010339	0.0010162
K00874	0.00041815	0.00048453	0.00042453	0.00044862	0.00043518	0.00038296	0.00039635	0.00044535	0.00046853	0.00038307	0.00038328	0.00033515	0.00043005	0.0004113	0.00052778	0.00047833	0.00029564	0.00042137	0.0004031	0.00041687
K00875	5.8936e-05	1.2401e-05	1.423e-05	8.0261e-05	8.3541e-05	2.215e-05	1.8421e-05	5.5337e-05	1.0076e-05	4.9965e-05	8.2713e-05	2.51e-05	4.9966e-05	5.7067e-05	4.2801e-05	8.0369e-05	2.1582e-05	6.1992e-05	4.8869e-05	5.5042e-05
K00876	0.00037896	0.000506	0.00044973	0.00042107	0.0003632	0.00037305	0.00047157	0.00033703	0.00036525	0.00038048	0.00037978	0.00036527	0.00041532	0.00037995	0.00044454	0.00030069	0.00035181	0.00033043	0.00041287	0.00037921
K00877	7.9563e-06	4.8392e-06	5.3363e-06	3.5938e-06	4.1474e-06	6.4118e-06	7.3683e-06	5.5926e-06	4.7581e-06	5.456e-06	3.4949e-06	4.4293e-06	5.4876e-06	5.9137e-06	4.7228e-06	4.157e-06	5.9128e-06	5.8483e-06	7.9967e-06	4.9248e-06
K00878	0.00030853	0.00031667	0.0002935	0.00027941	0.00028439	0.00031214	0.00026434	0.00032908	0.00037337	0.00031989	0.00027348	0.00026842	0.00030413	0.00027203	0.00035038	0.00037053	0.00021936	0.00029388	0.00026241	0.00029925
K00879	8.6636e-05	9.497e-05	6.9965e-05	6.4388e-05	8.8873e-05	0.00010667	5.649e-05	9.2425e-05	0.00017297	6.6908e-05	8.5043e-05	7.0574e-05	7.336e-05	4.9971e-05	0.0001101	0.00013552	6.5928e-05	5.8775e-05	5.7162e-05	7.8507e-05
K00880	3.4183e-05	0.00014124	9.1606e-05	8.086e-05	6.8433e-05	0.00010521	2.7017e-05	6.9172e-05	0.00011727	5.8867e-05	9.0285e-05	5.2562e-05	8.6357e-05	9.728e-05	7.2909e-05	0.00010392	6.5336e-05	9.9128e-05	5.3608e-05	6.9526e-05
K00881	2.0628e-05	4.1133e-05	2.8757e-05	3.2643e-05	4.1771e-05	2.0693e-05	1.228e-05	2.3254e-05	7.2211e-05	2.7567e-05	5.2424e-05	2.6576e-05	3.2348e-05	2.2472e-05	3.9259e-05	4.1293e-05	3.7546e-05	3.4212e-05	2.9914e-05	4.2295e-05
K00882	0.00055105	0.00048967	0.00053066	0.00049085	0.00049799	0.00059717	0.00056797	0.00047979	0.00052283	0.00052349	0.00051987	0.00050317	0.00061981	0.00050385	0.00054815	0.00047251	0.00048101	0.00059682	0.00062997	0.00042237
K00883	5.0685e-05	6.0793e-05	2.935e-05	7.3672e-05	8.3837e-05	2.4481e-05	2.2719e-05	3.9737e-05	6.3534e-05	3.9053e-05	8.4461e-05	3.5435e-05	4.9966e-05	4.9675e-05	5.7265e-05	8.3694e-05	4.5233e-05	6.053e-05	4.9758e-05	7.0106e-05
K00884	5.0685e-05	4.446e-05	3.765e-05	6.0794e-05	7.6135e-05	2.9145e-05	1.9035e-05	4.5624e-05	7.249e-05	4.7094e-05	7.2228e-05	3.6616e-05	5.1121e-05	5.7954e-05	5.4608e-05	9.09e-05	4.3163e-05	6.1699e-05	4.7684e-05	7.8507e-05
K00885	1.8859e-05	4.1436e-05	2.3124e-05	2.6654e-05	4.0289e-05	1.7778e-05	1.0131e-05	2.0899e-05	6.2415e-05	2.2973e-05	4.456e-05	2.3623e-05	2.8882e-05	1.8628e-05	3.1289e-05	4.3787e-05	2.986e-05	3.0119e-05	2.8433e-05	4.1136e-05
K00886	0.00012553	0.0001237	0.00011443	0.00015603	7.1099e-05	6.2661e-05	6.5394e-05	0.00014776	0.0001531	7.6384e-05	0.00013077	0.00012107	7.3938e-05	4.6422e-05	7.9698e-05	7.2609e-05	4.4937e-05	0.00011989	3.406e-05	0.00011472
K00887	5.8936e-06	5.4441e-06	5.6327e-06	7.487e-06	2.37e-06	6.4118e-06	4.9122e-06	6.4757e-06	4.1983e-06	7.1789e-06	4.0774e-06	6.2011e-06	7.2205e-06	5.3223e-06	5.018e-06	4.157e-06	5.0259e-06	4.971e-06	3.8503e-06	4.9248e-06
K00888	6.7776e-06	4.5368e-06	4.7434e-06	4.1927e-06	4.7399e-06	6.7032e-06	6.4472e-06	5.5926e-06	3.6385e-06	3.4459e-06	2.9124e-06	8.8587e-06	4.6211e-06	6.2094e-06	4.1325e-06	3.8799e-06	3.5477e-06	5.2635e-06	5.3312e-06	3.766e-06
K00889	3.5362e-06	5.7466e-06	6.8186e-06	4.4922e-06	6.2211e-06	2.9145e-06	2.4561e-06	3.8265e-06	6.1575e-06	4.0202e-06	4.9511e-06	4.4293e-06	5.1988e-06	7.0964e-06	7.3794e-06	6.6512e-06	3.5477e-06	4.6786e-06	5.3312e-06	6.9526e-06
K00891	0.00030882	0.00031848	0.00031217	0.00032733	0.00027551	0.00029786	0.00029197	0.000297	0.00036889	0.00029376	0.00031425	0.00028702	0.00029835	0.00025695	0.00029842	0.00031205	0.00027199	0.00032663	0.00028048	0.00030968
K00892	2.3869e-05	6.533e-05	4.5655e-05	4.4922e-05	5.2139e-05	2.3316e-05	1.6886e-05	2.5608e-05	8.7604e-05	3.6469e-05	6.4073e-05	3.6911e-05	3.8413e-05	2.4246e-05	4.3982e-05	6.4572e-05	4.3459e-05	4.8833e-05	4.3538e-05	5.8518e-05
K00893	5.0096e-06	3.6294e-06	5.0398e-06	7.1875e-06	6.8136e-06	5.246e-06	6.1402e-06	5.2983e-06	5.3178e-06	3.733e-06	5.2424e-06	7.0869e-06	5.4876e-06	5.618e-06	3.5421e-06	7.2055e-06	3.8433e-06	3.2166e-06	5.9235e-06	6.3733e-06
K00894	4.4202e-06	5.1417e-06	6.5221e-06	4.7917e-06	2.9624e-06	5.246e-06	5.8332e-06	4.4152e-06	5.5977e-06	3.733e-06	4.6599e-06	4.4293e-06	3.4658e-06	5.9137e-06	3.8373e-06	4.9884e-06	4.7302e-06	4.3862e-06	5.9235e-06	4.0557e-06
K00895	0.00017416	0.00015879	0.00017165	0.00016591	0.0001022	8.6559e-05	0.00010223	0.00019868	0.00018584	9.1029e-05	0.00013426	9.715e-05	4.5345e-05	0.00010674	9.4162e-05	9.0068e-05	9.7857e-05	0.00016902	9.2703e-05	0.00010168
K00897	8.0153e-05	8.9526e-05	0.00011532	7.2474e-05	9.4798e-05	0.00014223	0.00013723	9.2131e-05	4.842e-05	6.0303e-05	9.6984e-05	0.00011871	0.00010022	0.00011147	9.7999e-05	7.1223e-05	0.00013156	9.6204e-05	0.00011344	8.8936e-05
K00898	4.1255e-06	7.2588e-06	5.6327e-06	5.9896e-06	5.0362e-06	3.7888e-06	5.2192e-06	4.1209e-06	3.6385e-06	3.4459e-06	8.4461e-06	4.7246e-06	6.0652e-06	4.4353e-06	6.7891e-06	3.8799e-06	4.139e-06	5.8483e-06	7.1082e-06	5.7939e-06
K00899	8.5457e-06	5.9583e-05	5.8106e-05	2.9649e-05	3.6734e-05	2.0984e-05	7.0613e-06	3.0024e-05	2.379e-05	5.5996e-05	5.4754e-05	3.1596e-05	5.372e-05	5.7067e-05	3.7783e-05	6.9283e-06	6.1493e-05	5.5559e-06	6.2789e-05	4.3454e-05
K00900	5.5989e-06	4.2343e-06	5.9292e-06	4.4922e-06	7.1099e-06	4.9546e-06	4.6052e-06	5.0039e-06	3.0787e-06	7.7532e-06	5.2424e-06	5.6105e-06	5.1988e-06	5.618e-06	6.1987e-06	5.8198e-06	2.6608e-06	3.2166e-06	4.4426e-06	3.766e-06
K00901	0.00019802	0.00021172	0.00019744	0.00017939	0.00019463	0.00020897	0.00021	0.0001772	0.00019872	0.00020532	0.00020096	0.00019873	0.00020766	0.00020668	0.00020692	0.00019843	0.00018152	0.00018948	0.00020406	0.00019381
K00902	6.7776e-06	3.9319e-06	4.7434e-06	2.6953e-06	2.9624e-06	5.246e-06	5.5262e-06	7.3587e-06	2.7989e-06	4.8817e-06	5.8249e-06	4.1341e-06	4.0435e-06	4.1396e-06	4.4277e-06	2.7713e-06	5.3215e-06	2.0469e-06	4.4426e-06	2.8969e-06
K00903	0.00013378	0.00019145	0.0001506	0.0002324	0.00026573	8.7725e-05	4.2061e-05	0.00013864	0.00029388	0.00013583	0.00033522	0.00014794	0.00016578	0.00015139	0.0002022	0.00029875	0.00018123	0.00020177	0.00017919	0.00024247
K00904	4.4202e-06	5.1417e-06	4.4469e-06	4.4922e-06	5.0362e-06	3.7888e-06	4.9122e-06	5.5926e-06	3.0787e-06	5.1688e-06	5.8249e-06	5.3152e-06	4.0435e-06	6.5051e-06	3.5421e-06	6.9283e-06	4.7302e-06	4.971e-06	3.8503e-06	5.7939e-06
K00905	4.4202e-06	4.8392e-06	4.1504e-06	4.7917e-06	5.3324e-06	6.4118e-06	6.1402e-06	4.4152e-06	5.0379e-06	3.733e-06	4.9511e-06	8.5634e-06	5.4876e-06	5.9137e-06	5.3132e-06	5.2655e-06	2.6608e-06	6.1407e-06	7.1082e-06	4.9248e-06
K00906	6.4829e-05	8.7711e-05	6.5221e-05	8.9545e-05	0.0001262	0.00012998	4.8815e-05	0.00012775	0.00012651	7.7532e-05	0.00010106	0.00013022	6.9606e-05	0.00010438	6.5234e-05	0.0001527	0.00016851	9.8544e-05	0.00010366	0.00010023
K00907	5.3042e-06	5.7466e-06	4.1504e-06	7.7865e-06	3.5549e-06	4.6631e-06	5.5262e-06	5.5926e-06	5.3178e-06	6.6046e-06	4.9511e-06	4.7246e-06	6.9317e-06	5.0266e-06	3.8373e-06	6.3741e-06	5.9128e-06	3.8014e-06	5.035e-06	6.3733e-06
K00908	3.5362e-06	6.049e-06	5.0398e-06	4.1927e-06	5.6286e-06	4.6631e-06	7.0613e-06	7.3587e-06	5.0379e-06	8.0404e-06	4.6599e-06	5.0199e-06	3.177e-06	5.0266e-06	5.3132e-06	3.6027e-06	7.391e-06	4.0938e-06	5.9235e-06	7.2423e-06
K00909	7.367e-06	5.1417e-06	4.1504e-06	5.6901e-06	5.0362e-06	4.9546e-06	5.5262e-06	7.0644e-06	4.7581e-06	6.0303e-06	5.5336e-06	3.5435e-06	4.6211e-06	5.618e-06	2.9518e-06	2.4942e-06	5.0259e-06	3.8014e-06	3.2579e-06	4.3454e-06
K00910	5.3042e-06	7.2588e-06	6.2257e-06	5.0912e-06	5.9249e-06	4.0802e-06	6.4472e-06	8.5361e-06	4.4782e-06	5.1688e-06	4.0774e-06	2.6576e-06	4.9099e-06	6.8007e-06	4.7228e-06	6.6512e-06	5.6172e-06	6.1407e-06	4.4426e-06	6.3733e-06
K00911	7.6617e-06	5.1417e-06	5.9292e-06	5.3906e-06	5.0362e-06	6.1204e-06	6.4472e-06	5.0039e-06	3.9184e-06	4.0202e-06	4.9511e-06	2.067e-06	5.7764e-06	5.3223e-06	9.1505e-06	6.3741e-06	4.7302e-06	4.3862e-06	4.7388e-06	5.2145e-06
K00912	0.00023928	0.00013913	0.000201	0.00015932	0.00020826	0.00019031	0.00020416	0.00018662	0.00017605	0.00018005	0.00019892	0.00017038	0.00012073	0.00020934	0.00016058	0.00022365	0.00023829	0.00022077	0.0001703	0.00019033
K00913	4.7149e-06	6.3515e-06	5.6327e-06	3.5938e-06	5.3324e-06	7.2861e-06	5.5262e-06	5.887e-06	4.1983e-06	7.1789e-06	6.4073e-06	5.0199e-06	5.1988e-06	8.8705e-06	5.3132e-06	4.7113e-06	5.0259e-06	4.0938e-06	4.7388e-06	3.766e-06
K00914	7.0723e-06	7.2588e-06	4.1504e-06	5.9896e-06	5.0362e-06	3.4973e-06	6.1402e-06	2.9435e-06	3.6385e-06	5.7431e-06	3.4949e-06	6.4964e-06	2.8882e-06	4.7309e-06	6.1987e-06	5.5427e-06	4.4346e-06	2.6317e-06	5.3312e-06	6.3733e-06
K00915	5.3042e-06	6.6539e-06	5.9292e-06	4.1927e-06	4.4437e-06	4.0802e-06	5.2192e-06	6.1813e-06	4.1983e-06	3.733e-06	4.9511e-06	4.7246e-06	5.4876e-06	6.5051e-06	4.7228e-06	4.4341e-06	7.391e-06	4.971e-06	6.2197e-06	6.663e-06
K00916	6.7776e-06	6.049e-06	4.4469e-06	8.086e-06	5.0362e-06	4.3717e-06	6.1402e-06	5.887e-06	6.1575e-06	5.7431e-06	3.7862e-06	5.0199e-06	5.1988e-06	5.3223e-06	5.018e-06	5.2655e-06	4.4346e-06	4.971e-06	5.9235e-06	4.3454e-06
K00917	0.00021011	0.00033391	0.00028104	0.00019616	0.00022603	0.00024219	0.00016794	0.00020545	0.00041955	0.00024638	0.0002496	0.00016684	0.00028304	0.0002537	0.00028839	0.00027381	0.00024361	0.00022662	0.00027604	0.00021872
K00918	6.4829e-06	2.7221e-06	4.1504e-06	6.888e-06	7.4061e-06	3.7888e-06	5.2192e-06	4.4152e-06	4.4782e-06	4.0202e-06	6.4073e-06	3.5435e-06	3.7547e-06	4.7309e-06	4.7228e-06	5.5427e-06	1.7738e-06	5.8483e-06	6.812e-06	9.8496e-06
K00919	0.00042876	0.0004189	0.00041564	0.00044503	0.0003395	0.00038529	0.00037425	0.00038825	0.00044026	0.00043619	0.00042259	0.00038358	0.00042399	0.00039119	0.00037488	0.0003805	0.00037251	0.00044622	0.0003871	0.00041745
K00920	3.8308e-06	4.8392e-06	4.4469e-06	5.3906e-06	6.2211e-06	4.9546e-06	6.1402e-06	4.4152e-06	4.7581e-06	5.456e-06	6.6986e-06	4.4293e-06	4.0435e-06	5.9137e-06	7.3794e-06	5.8198e-06	4.139e-06	5.2635e-06	4.4426e-06	5.7939e-06
K00921	4.4202e-06	6.9564e-06	4.1504e-06	5.6901e-06	6.5174e-06	3.2059e-06	7.3683e-06	6.1813e-06	5.8776e-06	5.7431e-06	5.8249e-06	6.2011e-06	6.0652e-06	6.8007e-06	5.6084e-06	2.4942e-06	5.9128e-06	8.48e-06	3.8503e-06	4.6351e-06
K00922	1.0019e-05	4.8392e-06	5.6327e-06	4.4922e-06	3.2587e-06	5.246e-06	8.2893e-06	6.1813e-06	2.519e-06	7.1789e-06	6.1161e-06	8.8587e-06	5.4876e-06	5.0266e-06	3.5421e-06	3.0485e-06	2.9564e-06	5.2635e-06	5.6273e-06	4.6351e-06
K00923	7.367e-06	4.8392e-06	3.2611e-06	5.3906e-06	5.9249e-06	6.1204e-06	6.7543e-06	5.5926e-06	4.4782e-06	6.0303e-06	5.8249e-06	4.7246e-06	4.9099e-06	6.2094e-06	5.018e-06	3.8799e-06	5.6172e-06	4.971e-06	5.9235e-06	3.766e-06
K00924	5.2453e-05	3.7806e-05	2.7867e-05	9.4037e-05	6.8136e-05	3.8762e-05	5.4034e-05	4.1209e-05	1.4274e-05	3.6182e-05	0.00010106	6.0239e-05	6.2963e-05	5.7067e-05	5.6084e-05	5.5981e-05	3.6364e-05	6.2284e-05	5.6273e-05	7.9955e-05
K00925	0.00079593	0.00071772	0.00081675	0.00070857	0.00060671	0.00076738	0.00086055	0.00063432	0.00069272	0.00076728	0.00066462	0.00068153	0.00075295	0.00068983	0.00068127	0.00068618	0.00073585	0.00080472	0.00076443	0.00070859
K00926	0.00047001	0.00068536	0.00065933	0.00044024	0.00052495	0.00057735	0.00049797	0.00050275	0.00084218	0.00061337	0.00046715	0.00044293	0.00061461	0.00061443	0.00067655	0.0006241	0.00049786	0.00055617	0.00064448	0.00046119
K00927	0.00072314	0.00068505	0.00071536	0.00060944	0.00060078	0.00067878	0.00069876	0.0006302	0.00074702	0.00067568	0.00064656	0.00058408	0.00067699	0.00063513	0.00069603	0.00064184	0.00059926	0.00068659	0.0006273	0.0006295
K00928	0.00091881	0.0010737	0.0010109	0.00094606	0.00076283	0.00087667	0.0010429	0.00084655	0.00097484	0.0010398	0.00080383	0.00090359	0.0010146	0.00087138	0.00097527	0.00082475	0.00081597	0.00091672	0.00092673	0.00093426
K00929	0.00019449	0.00035236	0.0002425	0.00035668	0.00026662	0.00020955	0.00035521	0.00017484	0.00016233	0.0002906	0.00026299	0.00032777	0.00036045	0.00016499	0.00031112	0.00019649	0.00021138	0.00019212	0.00026212	0.00036878
K00930	0.00033151	0.00034328	0.00033648	0.00038214	0.00032202	0.00029115	0.00040372	0.00031672	0.00031991	0.00033511	0.00034367	0.00040927	0.00039626	0.0003288	0.0003492	0.00030762	0.00032668	0.00033452	0.00033675	0.0004302
K00931	0.00046795	0.00044218	0.00044588	0.00048096	0.00041978	0.00045436	0.00044793	0.00049509	0.00047133	0.00044768	0.00043512	0.00044293	0.00044623	0.00042342	0.00042004	0.00047251	0.00037251	0.0004588	0.00041909	0.00048437
K00932	2.6226e-05	5.3836e-05	3.7947e-05	3.9232e-05	4.888e-05	2.2733e-05	8.2893e-06	1.9133e-05	7.7528e-05	3.2162e-05	6.3782e-05	4.4884e-05	3.9568e-05	2.8681e-05	3.9259e-05	5.5149e-05	4.405e-05	3.4212e-05	3.7318e-05	5.0407e-05
K00933	4.7149e-06	6.9564e-06	5.9292e-06	5.9896e-06	7.1099e-06	6.1204e-06	7.0613e-06	8.5361e-06	5.8776e-06	4.5945e-06	4.3686e-06	7.0869e-06	5.7764e-06	6.5051e-06	5.018e-06	5.2655e-06	4.139e-06	5.2635e-06	6.5159e-06	7.2423e-06
K00934	7.367e-06	6.6539e-06	5.0398e-06	4.4922e-06	4.7399e-06	5.5375e-06	6.1402e-06	3.2378e-06	6.1575e-06	4.3074e-06	5.2424e-06	1.4764e-06	5.4876e-06	4.7309e-06	4.1325e-06	4.7113e-06	4.7302e-06	5.2635e-06	5.035e-06	5.2145e-06
K00936	0.00088021	0.0022424	0.0020391	0.0016717	0.0017298	0.001359	0.00063951	0.0015465	0.00096841	0.002096	0.0021366	0.0015175	0.0021997	0.0023179	0.0014576	0.00086133	0.0024633	0.00073396	0.0024654	0.0017915
K00937	0.00084779	0.00077549	0.00079985	0.00076158	0.0007178	0.00062311	0.00079209	0.00071409	0.00071007	0.00069894	0.00077908	0.00071135	0.0005915	0.00078208	0.00076923	0.00068535	0.00081804	0.00078279	0.00070549	0.00079405
K00938	0.0002328	0.00024589	0.00027007	0.0001725	0.00015582	0.00028241	0.00028214	0.00017484	0.00026841	0.00025385	0.00016397	0.00017511	0.00026254	0.00022383	0.00024264	0.00021173	0.00018596	0.00022516	0.00026212	0.00014369
K00939	0.00041196	0.00037988	0.00037502	0.00039112	0.00034631	0.00040365	0.00040986	0.00036352	0.00040108	0.00038565	0.00038473	0.00033693	0.00038933	0.00038735	0.00039613	0.00037302	0.00034915	0.0004085	0.00040102	0.0003682
K00940	0.0002549	0.00027674	0.00025466	0.00024767	0.00021241	0.00024161	0.00026771	0.00025108	0.00027121	0.00024724	0.00022193	0.00023416	0.0002377	0.00023832	0.00024795	0.00024914	0.00022439	0.00024446	0.00021887	0.00025783
K00941	0.00044172	0.00042797	0.000469	0.00039501	0.00037356	0.00043338	0.00043197	0.00041827	0.00042879	0.00042327	0.00039726	0.00040514	0.00041128	0.00041455	0.00044336	0.00043205	0.00036985	0.00044652	0.00038325	0.00043135
K00942	0.00043789	0.00038653	0.00046455	0.0003456	0.00034661	0.00044912	0.00043933	0.00037147	0.00042515	0.00038048	0.00039405	0.00039362	0.00039135	0.00038971	0.00042653	0.00038189	0.00038433	0.00043833	0.00042738	0.00034937
K00943	0.00035214	0.00031153	0.00035842	0.00031146	0.00027106	0.00032409	0.00034232	0.0003126	0.0003507	0.00035349	0.0003061	0.00030503	0.00034774	0.00030722	0.00035303	0.00032286	0.00030658	0.00034008	0.00031247	0.00032069
K00944	6.1883e-06	7.8637e-06	5.0398e-06	5.9896e-06	5.3324e-06	4.9546e-06	7.0613e-06	5.2983e-06	5.8776e-06	6.0303e-06	6.9898e-06	5.9058e-06	5.4876e-06	5.3223e-06	4.7228e-06	4.4341e-06	4.4346e-06	5.2635e-06	7.7006e-06	4.3454e-06
K00945	0.0004043	0.0003702	0.0004017	0.00037705	0.00032617	0.00037626	0.00040341	0.00036823	0.00040108	0.00036699	0.00036435	0.00037206	0.0003642	0.0003767	0.00037871	0.00035224	0.00033378	0.00040646	0.00036637	0.00033518
K00946	0.00023781	0.00016605	0.00020782	0.00019885	0.00017745	0.00017895	0.00020877	0.00024784	0.00024658	0.00015277	0.00018028	0.00018987	0.00010831	0.00019663	0.00015379	0.00020951	0.00022705	0.00024563	0.0001469	0.0001828
K00947	5.3042e-06	3.9319e-06	6.5221e-06	5.3906e-06	5.6286e-06	2.623e-06	3.6841e-06	5.2983e-06	5.0379e-06	4.8817e-06	6.6986e-06	6.7917e-06	2.8882e-06	7.9835e-06	5.3132e-06	5.2655e-06	4.7302e-06	6.1407e-06	4.4426e-06	3.766e-06
K00948	0.00083394	0.00073012	0.00072188	0.00071516	0.00068936	0.00082013	0.00083446	0.00071998	0.0007918	0.00081122	0.00067772	0.00075535	0.00084047	0.00067239	0.00077838	0.00073551	0.00066046	0.00079537	0.00077746	0.00069208
K00949	0.00017622	0.00022291	0.00017906	0.00017729	0.00016264	0.00019731	0.00015688	0.00015718	0.00017577	0.00021393	0.00017416	0.00013436	0.00020477	0.00016824	0.00018891	0.00017626	0.00015285	0.00013422	0.00018807	0.00017382
K00950	0.00025018	0.00023652	0.0002597	0.00024258	0.00020767	0.00026609	0.0002496	0.00024137	0.00024238	0.00023891	0.00024435	0.00023889	0.00023394	0.00025961	0.00024027	0.00024526	0.00027583	0.00028452	0.00025797	0.00022857
K00951	0.0013199	0.001283	0.0013029	0.0012222	0.0010795	0.0012209	0.00133	0.0012224	0.0012511	0.001132	0.0011691	0.0011295	0.0012252	0.0012135	0.0011763	0.0010697	0.0011648	0.0012933	0.0012179	0.0011194
K00952	5.5989e-06	4.8392e-06	4.7434e-06	3.5938e-06	6.2211e-06	4.0802e-06	4.9122e-06	5.2983e-06	5.0379e-06	4.8817e-06	4.3686e-06	3.8388e-06	4.0435e-06	6.2094e-06	6.1987e-06	5.8198e-06	3.5477e-06	4.971e-06	3.5541e-06	6.9526e-06
K00953	5.3042e-06	3.6294e-06	7.708e-06	5.3906e-06	4.4437e-06	6.1204e-06	6.4472e-06	5.2983e-06	5.3178e-06	7.7532e-06	6.6986e-06	4.7246e-06	4.3323e-06	4.7309e-06	5.018e-06	4.9884e-06	6.2084e-06	5.8483e-06	2.6656e-06	3.1866e-06
K00954	0.00028378	0.00026737	0.00028104	0.00025306	0.000229	0.0002521	0.00027078	0.00024048	0.00028045	0.00024925	0.00024581	0.00024037	0.00027987	0.00025872	0.0002754	0.00022725	0.00024834	0.00027926	0.00026952	0.00024943
K00955	4.4202e-05	8.4686e-06	2.5792e-05	3.0247e-05	7.6727e-05	0.0001055	3.7148e-05	0.00010803	7.5569e-06	5.3124e-05	3.1163e-05	7.9138e-05	2.8882e-05	7.5104e-05	7.9698e-06	7.6766e-05	0.00012535	5.9945e-05	5.2127e-05	3.8819e-05
K00956	0.00028554	0.0002217	0.00025703	0.00023419	0.00023344	0.00016991	0.0004117	0.00018102	0.00024602	0.00023576	0.00020853	0.00025129	0.00019842	0.00023655	0.00026625	0.00022642	0.00022439	0.00027078	0.0002168	0.00028709
K00957	0.00023191	0.00014064	0.00019003	0.00014495	0.00018367	0.00016204	0.00026526	0.00016248	0.00017857	0.00018493	0.00015815	0.00018574	0.00014297	0.00018924	0.00015379	0.00019482	0.00019837	0.00020381	0.00017297	0.0002051
K00958	0.00012406	0.00016998	0.000142	0.00021353	0.00013924	8.3353e-05	0.00013048	0.00011509	8.6205e-05	0.00014588	0.00021261	0.00014558	0.00015307	0.00018599	0.00014434	9.8659e-05	0.00015166	0.00015059	0.0001626	0.00016889
K00959	4.7149e-06	6.6539e-06	3.5575e-06	1.4974e-06	7.9986e-06	4.3717e-06	3.9912e-06	5.887e-06	5.5977e-06	3.1587e-06	5.2424e-06	7.0869e-06	5.1988e-06	6.8007e-06	7.0843e-06	5.2655e-06	3.252e-06	4.971e-06	5.6273e-06	3.766e-06
K00960	7.367e-06	3.3875e-05	2.7571e-05	1.8268e-05	1.9848e-05	1.5447e-05	5.8332e-06	1.7661e-05	1.4274e-05	2.6418e-05	2.9124e-05	1.8899e-05	2.455e-05	2.8681e-05	1.8006e-05	6.9283e-06	3.6955e-05	6.4331e-06	3.643e-05	2.2306e-05
K00961	3.2415e-06	6.049e-06	5.3363e-06	2.9948e-06	5.6286e-06	4.3717e-06	5.2192e-06	3.8265e-06	4.1983e-06	4.8817e-06	4.9511e-06	5.9058e-06	4.6211e-06	4.4353e-06	7.0843e-06	6.3741e-06	5.3215e-06	4.971e-06	3.5541e-06	6.3733e-06
K00962	0.0011896	0.0011753	0.0012119	0.0011069	0.00098531	0.00112	0.0011485	0.0011017	0.0012687	0.001213	0.0010747	0.0010772	0.0011403	0.0010692	0.0011654	0.0011044	0.0010161	0.0011398	0.0010295	0.0011423
K00963	0.00059849	0.00052627	0.00055646	0.00054655	0.00057264	0.000494	0.00051332	0.00054719	0.00060092	0.00060073	0.00055657	0.00053123	0.00061028	0.00055175	0.00060187	0.00062244	0.00048041	0.00053278	0.00055207	0.00057475
K00965	0.00037424	0.00023803	0.0002929	0.00021533	0.00032942	0.00041444	0.0003721	0.00026845	0.00046545	0.00030841	0.00027056	0.00024509	0.00034023	0.00023477	0.0004038	0.00037385	0.00022883	0.00028276	0.00036341	0.0002361
K00966	1.7975e-05	0.00015062	0.00013934	0.00010871	9.1243e-05	7.8982e-05	4.9429e-05	6.093e-05	5.0659e-05	0.00010338	0.00014417	0.00011634	0.00014008	0.0001301	9.5933e-05	1.2748e-05	0.00013659	3.0996e-05	0.0001475	0.00011559
K00967	7.0723e-06	4.5368e-06	3.2611e-06	4.7917e-06	5.0362e-06	5.5375e-06	8.5963e-06	6.4757e-06	5.0379e-06	6.3175e-06	4.0774e-06	5.6105e-06	6.0652e-06	3.2525e-06	7.0843e-06	3.8799e-06	5.6172e-06	3.8014e-06	6.2197e-06	7.532e-06
K00968	5.8936e-06	5.4441e-06	5.0398e-06	4.4922e-06	4.7399e-06	6.1204e-06	7.0613e-06	4.4152e-06	5.0379e-06	5.456e-06	5.8249e-06	6.2011e-06	7.5093e-06	3.8439e-06	5.9036e-06	6.6512e-06	3.8433e-06	3.509e-06	5.6273e-06	4.9248e-06
K00969	0.00032798	0.00032181	0.00033322	0.0002857	0.00026662	0.00028503	0.00028521	0.00031495	0.00036273	0.00033282	0.00029532	0.00025867	0.00030499	0.00028504	0.00029075	0.00030208	0.00027997	0.00030353	0.00028226	0.00028593
K00970	0.00039723	0.0002713	0.00034241	0.00036507	0.00032705	0.0003203	0.00033556	0.00039237	0.00038764	0.00031128	0.00040017	0.00037886	0.00025127	0.00029805	0.00032174	0.00039796	0.00030362	0.00041991	0.00024701	0.00040789
K00971	0.0005649	0.00046668	0.00045477	0.00056033	0.00058597	0.00048905	0.00042828	0.00059282	0.0003952	0.00040001	0.0005455	0.00047807	0.00033041	0.00048137	0.00040912	0.0005199	0.00061966	0.00054038	0.00042886	0.00048205
K00972	5.6873e-05	2.7826e-05	5.6624e-05	4.9714e-05	3.7031e-05	2.1276e-05	1.5658e-05	7.5059e-05	7.305e-05	3.0439e-05	4.3395e-05	4.4884e-05	4.2745e-05	3.9326e-05	6.7891e-05	8.0923e-05	9.7561e-06	4.2108e-05	1.7771e-05	6.5471e-05
K00973	0.00049241	0.00051417	0.00050102	0.00054206	0.00044111	0.00044766	0.00054587	0.00038942	0.00045034	0.00044595	0.00054754	0.00050701	0.00051583	0.00041928	0.00045841	0.00043676	0.00045647	0.00052225	0.0004881	0.00056983
K00974	0.00044467	0.00042192	0.00043461	0.00035997	0.00036942	0.00043367	0.00049644	0.00038354	0.00041899	0.00046921	0.00034163	0.00046331	0.00049215	0.00046008	0.00041797	0.00041404	0.00041449	0.00040529	0.00043242	0.00039369
K00975	0.00050508	0.00054199	0.00045418	0.00068042	0.00051932	0.00046748	0.00042214	0.00052306	0.00048756	0.0005209	0.00061511	0.00056194	0.00067295	0.00040361	0.00056704	0.00048637	0.00035329	0.00041523	0.00044989	0.0005875
K00976	6.4829e-06	5.7466e-06	5.6327e-06	5.6901e-06	3.5549e-06	5.8289e-06	6.7543e-06	3.2378e-06	4.1983e-06	4.3074e-06	5.5336e-06	5.9058e-06	4.6211e-06	7.0964e-06	5.3132e-06	4.157e-06	5.0259e-06	5.8483e-06	5.6273e-06	5.7939e-06
K00977	5.8936e-06	5.7466e-06	5.9292e-06	6.5886e-06	6.8136e-06	2.9145e-06	6.1402e-06	4.7096e-06	4.7581e-06	4.8817e-06	5.2424e-06	5.3152e-06	4.9099e-06	7.6878e-06	5.018e-06	3.8799e-06	3.8433e-06	4.971e-06	5.035e-06	6.9526e-06
K00978	7.6027e-05	8.9223e-05	8.4788e-05	9.793e-05	8.8873e-05	4.7797e-05	5.3727e-05	7.2998e-05	3.7225e-05	6.3749e-05	0.00010397	5.1971e-05	6.5273e-05	9.8463e-05	6.4349e-05	4.2678e-05	9.3422e-05	6.9887e-05	0.00010751	7.561e-05
K00979	0.00022248	0.00014911	0.00018114	0.00015483	0.00017923	0.00017836	0.00020447	0.00017219	0.00016373	0.00015104	0.00018348	0.00013997	9.8487e-05	0.00019249	0.00015762	0.00019316	0.00021818	0.00020791	0.00015964	0.00016136
K00980	7.1902e-05	7.9545e-05	8.1526e-05	6.6185e-05	3.6734e-05	4.6631e-05	7.3683e-05	5.7398e-05	7.8928e-05	7.3799e-05	4.8055e-05	5.1676e-05	6.2674e-05	6.1207e-05	5.5789e-05	3.4919e-05	5.6172e-05	7.8659e-05	5.7754e-05	3.9398e-05
K00981	0.00051068	0.0005181	0.00053926	0.00047468	0.00045562	0.00053539	0.00049889	0.00048332	0.00054018	0.0004741	0.00050094	0.00049579	0.00049302	0.00046925	0.00048675	0.00049607	0.00050318	0.00051933	0.00049047	0.00047336
K00982	0.00066097	0.0002967	0.00047048	0.00055074	0.00056523	0.0004258	0.00045775	0.00070526	0.00063674	0.00048242	0.00057433	0.00053064	0.00040117	0.00052927	0.0004531	0.00067177	0.00046415	0.00070121	0.00042353	0.00058142
K00983	0.00018329	0.00018843	0.00019418	8.9245e-05	7.8801e-05	0.00016117	0.00015381	0.00010067	0.00012931	0.00012692	0.00011562	5.7877e-05	7.9425e-05	0.00014134	0.00012309	0.00012277	0.00015019	0.00015937	0.0001004	0.00010574
K00984	5.7168e-05	2.2684e-05	4.8323e-05	2.2162e-05	6.9025e-05	6.4701e-05	6.6622e-05	3.8854e-05	7.1931e-05	4.5371e-05	3.99e-05	5.1971e-05	3.7258e-05	6.1502e-05	6.4644e-05	6.8729e-05	3.7546e-05	7.515e-05	6.9897e-05	3.1577e-05
K00985	3.8308e-06	5.4441e-06	6.8186e-06	5.0912e-06	6.8136e-06	5.246e-06	5.8332e-06	7.3587e-06	4.7581e-06	3.733e-06	2.9124e-06	5.9058e-06	5.1988e-06	2.9568e-06	4.1325e-06	6.6512e-06	5.3215e-06	4.971e-06	5.3312e-06	5.7939e-06
K00986	5.3042e-06	5.1417e-06	4.1504e-06	4.4922e-06	4.4437e-06	6.9947e-06	5.5262e-06	5.887e-06	6.9971e-06	3.733e-06	4.6599e-06	4.7246e-06	5.1988e-06	5.618e-06	6.7891e-06	4.4341e-06	6.2084e-06	5.5559e-06	5.035e-06	5.2145e-06
K00987	8.251e-06	3.327e-06	3.854e-06	5.3906e-06	5.9249e-06	5.246e-06	5.5262e-06	3.8265e-06	4.7581e-06	5.456e-06	4.3686e-06	5.6105e-06	5.4876e-06	6.5051e-06	7.0843e-06	6.0969e-06	5.3215e-06	4.6786e-06	3.5541e-06	6.0836e-06
K00988	5.5989e-06	5.4441e-06	5.9292e-06	5.9896e-06	4.4437e-06	3.7888e-06	3.9912e-06	7.0644e-06	5.3178e-06	4.3074e-06	6.4073e-06	4.1341e-06	6.354e-06	6.5051e-06	6.7891e-06	6.6512e-06	4.139e-06	5.2635e-06	5.9235e-06	4.6351e-06
K00989	0.00019861	0.00018601	0.00019537	0.0002312	0.00018426	0.00017108	0.00018666	0.00021899	0.00020991	0.00019555	0.00023562	0.00023623	0.00020997	0.00018244	0.00016028	0.00021284	0.00020104	0.00022984	0.00018185	0.00025754
K00990	0.00040194	0.00014639	0.00027511	0.00032553	0.00043459	0.00034769	0.0003767	0.00037765	0.00032103	0.00030755	0.0003591	0.00037472	0.00028506	0.00043347	0.00028367	0.00050106	0.00041212	0.00045675	0.00034149	0.00039398
K00991	0.00035538	0.00046487	0.00041564	0.00039442	0.00031669	0.00033604	0.00043504	0.00040179	0.00039016	0.00038335	0.0003294	0.00035198	0.00038269	0.00039237	0.000361	0.00037136	0.00033023	0.00036025	0.00034682	0.00038645
K00992	5.3042e-06	6.9564e-06	4.7434e-06	6.2891e-06	2.6662e-06	6.1204e-06	5.2192e-06	6.1813e-06	4.7581e-06	6.3175e-06	2.6212e-06	9.4493e-06	5.7764e-06	5.3223e-06	5.9036e-06	4.157e-06	5.3215e-06	4.3862e-06	5.6273e-06	4.6351e-06
K00993	4.4202e-06	7.5613e-06	3.854e-06	5.3906e-06	2.9624e-06	5.8289e-06	5.5262e-06	6.1813e-06	5.0379e-06	6.3175e-06	4.9511e-06	4.7246e-06	4.9099e-06	6.2094e-06	4.7228e-06	4.9884e-06	4.4346e-06	4.3862e-06	5.6273e-06	4.3454e-06
K00994	6.7776e-06	5.1417e-06	3.854e-06	6.5886e-06	6.2211e-06	6.1204e-06	4.6052e-06	6.77e-06	6.1575e-06	4.0202e-06	6.4073e-06	4.4293e-06	4.6211e-06	7.3921e-06	3.5421e-06	4.4341e-06	4.4346e-06	4.0938e-06	3.8503e-06	7.2423e-06
K00995	0.00044821	0.00034479	0.0004103	0.00036896	0.00036083	0.00034857	0.0003503	0.00045742	0.00045174	0.00040116	0.00034891	0.00037561	0.00036853	0.0003359	0.0004038	0.00043538	0.0003116	0.00043277	0.00033053	0.00039659
K00996	5.5989e-06	6.049e-06	2.3717e-06	6.888e-06	4.1474e-06	5.8289e-06	6.1402e-06	5.5926e-06	4.1983e-06	5.1688e-06	5.8249e-06	5.9058e-06	5.4876e-06	4.7309e-06	7.3794e-06	7.4826e-06	4.7302e-06	6.1407e-06	6.812e-06	6.3733e-06
K00997	0.00020215	0.00020869	0.00021819	0.00018897	0.00016471	0.00016671	0.00017285	0.00015718	0.00021355	0.00021307	0.00018232	0.00016831	0.00020391	0.00016529	0.00020043	0.0001854	0.00016172	0.00019972	0.00017711	0.00019844
K00998	0.00020745	0.00022714	0.00023331	0.00020185	0.00025299	0.00019177	0.00020201	0.0001981	0.000199	0.00020474	0.00024901	0.0002008	0.00019466	0.00022472	0.00021637	0.00022088	0.00026962	0.00021551	0.00021502	0.000239
K00999	3.8308e-06	5.4441e-06	5.3363e-06	5.9896e-06	3.5549e-06	6.9947e-06	6.7543e-06	5.5926e-06	3.6385e-06	3.4459e-06	5.5336e-06	7.3822e-06	4.9099e-06	5.9137e-06	6.1987e-06	6.0969e-06	6.2084e-06	7.0179e-06	5.3312e-06	5.2145e-06
K01000	0.00061117	0.00057375	0.00062464	0.00052349	0.00048466	0.00056948	0.0006085	0.00054513	0.00059448	0.00055795	0.00055278	0.00053831	0.00054731	0.00053667	0.00056999	0.00053653	0.0005218	0.00057108	0.00054259	0.00053391
K01001	5.3042e-06	4.5368e-06	4.4469e-06	4.7917e-06	7.9986e-06	6.7032e-06	5.2192e-06	4.4152e-06	6.9971e-06	7.1789e-06	5.8249e-06	4.4293e-06	3.7547e-06	5.9137e-06	4.7228e-06	3.0485e-06	4.139e-06	3.8014e-06	7.7006e-06	4.9248e-06
K01002	0.00012494	0.00016363	0.00015179	7.8164e-05	0.00012413	0.00011745	4.8201e-05	6.2696e-05	0.00022811	0.00013209	0.00017067	8.9768e-05	8.1447e-05	6.3572e-05	0.00017475	0.00018706	0.00015698	0.00010673	8.8557e-05	0.00014745
K01003	2.6816e-05	9.376e-06	1.7491e-05	1.4675e-05	3.8216e-05	5.3626e-05	2.5482e-05	5.622e-05	3.3586e-06	2.4696e-05	1.3688e-05	3.573e-05	1.3863e-05	4.0509e-05	6.7891e-06	3.4365e-05	6.3563e-05	3.3335e-05	2.7544e-05	2.1437e-05
K01004	8.0447e-05	4.2948e-05	4.0022e-05	8.0261e-05	9.9538e-05	6.1204e-05	3.6534e-05	0.00011921	4.7301e-05	6.5185e-05	8.7082e-05	6.0534e-05	3.5236e-05	6.1798e-05	2.3319e-05	6.5958e-05	6.6519e-05	8.8017e-05	4.6203e-05	5.3593e-05
K01005	1.385e-05	6.8959e-05	4.0022e-05	3.1146e-05	1.4812e-05	6.3535e-05	1.8728e-05	4.3858e-05	2.463e-05	3.1587e-05	1.9222e-05	1.565e-05	4.6211e-05	6.5051e-05	1.8301e-05	4.2401e-05	1.833e-05	5.4389e-05	1.4513e-05	8.1114e-06
K01006	0.00072373	0.00084293	0.00065043	0.00082956	0.00055339	0.00051469	0.00058455	0.00073116	0.0007459	0.00073254	0.00056268	0.00050406	0.00060537	0.00059107	0.00060246	0.00064517	0.00041537	0.00083513	0.00056806	0.00060894
K01007	0.00080447	0.00097631	0.00071091	0.0010137	0.00099509	0.00067732	0.0011805	0.0007135	0.00055361	0.00098007	0.00083092	0.0012015	0.001116	0.00055145	0.001024	0.00089181	0.00069741	0.00062781	0.00065129	0.0011799
K01008	0.00010196	7.9847e-05	9.3088e-05	0.00012009	0.00017419	0.00013028	6.4472e-05	0.00013305	0.00014946	9.6198e-05	0.0001564	9.3016e-05	8.6357e-05	0.00013394	0.00010981	0.00018734	0.00012683	0.00015703	0.00014365	0.00010777
K01011	0.00019861	0.00022654	0.00019507	0.00031206	0.00031698	0.00025093	0.00019894	0.00025491	0.00021411	0.00019354	0.00037017	0.00029647	0.00025763	0.00027735	0.00024205	0.00027935	0.00031811	0.00026727	0.00025441	0.00028998
K01012	0.0004765	0.00042434	0.0004604	0.00041358	0.00041771	0.00033458	0.000521	0.00040061	0.00039548	0.00044797	0.00035736	0.00040927	0.00040233	0.00044264	0.00046874	0.00043648	0.00040828	0.00043307	0.00033971	0.00046988
K01013	5.5989e-06	4.8392e-06	5.6327e-06	4.7917e-06	5.3324e-06	4.3717e-06	7.0613e-06	5.0039e-06	5.3178e-06	5.1688e-06	3.4949e-06	4.7246e-06	5.1988e-06	3.8439e-06	6.1987e-06	4.7113e-06	5.3215e-06	6.7255e-06	3.5541e-06	4.9248e-06
K01014	5.0096e-06	7.5613e-06	3.5575e-06	4.7917e-06	3.8512e-06	4.9546e-06	7.6753e-06	6.1813e-06	4.1983e-06	6.0303e-06	4.0774e-06	4.4293e-06	4.6211e-06	5.618e-06	4.1325e-06	4.7113e-06	5.9128e-06	5.2635e-06	4.7388e-06	5.7939e-06
K01015	5.0096e-06	5.4441e-06	5.9292e-06	7.487e-06	7.4061e-06	5.246e-06	7.0613e-06	5.2983e-06	6.1575e-06	6.0303e-06	3.4949e-06	6.4964e-06	5.4876e-06	4.1396e-06	4.4277e-06	3.8799e-06	5.9128e-06	4.971e-06	5.3312e-06	4.0557e-06
K01016	3.5362e-06	7.2588e-06	4.1504e-06	6.5886e-06	5.9249e-06	5.246e-06	5.8332e-06	5.5926e-06	4.7581e-06	4.5945e-06	3.2037e-06	6.4964e-06	4.6211e-06	6.8007e-06	7.9698e-06	4.7113e-06	6.2084e-06	7.3104e-06	5.6273e-06	4.3454e-06
K01017	6.1883e-06	2.7221e-06	5.9292e-06	4.7917e-06	3.8512e-06	4.3717e-06	5.2192e-06	5.0039e-06	5.0379e-06	3.4459e-06	6.6986e-06	6.4964e-06	6.0652e-06	5.3223e-06	4.7228e-06	6.9283e-06	6.5041e-06	4.0938e-06	7.7006e-06	4.0557e-06
K01018	5.0096e-06	6.6539e-06	4.4469e-06	4.7917e-06	5.0362e-06	5.8289e-06	3.0701e-06	5.0039e-06	5.3178e-06	4.8817e-06	7.2811e-06	2.3623e-06	4.6211e-06	6.5051e-06	5.3132e-06	6.6512e-06	5.3215e-06	5.5559e-06	5.3312e-06	4.9248e-06
K01019	5.8936e-06	6.6539e-06	4.1504e-06	6.2891e-06	6.5174e-06	6.1204e-06	5.2192e-06	8.2417e-06	3.9184e-06	4.0202e-06	4.6599e-06	6.4964e-06	4.6211e-06	6.5051e-06	4.7228e-06	4.4341e-06	4.4346e-06	4.0938e-06	4.7388e-06	5.5042e-06
K01020	4.7149e-06	4.5368e-06	4.4469e-06	6.5886e-06	4.4437e-06	5.5375e-06	4.9122e-06	4.7096e-06	6.7173e-06	5.456e-06	7.5723e-06	4.7246e-06	4.9099e-06	6.2094e-06	4.4277e-06	5.2655e-06	2.9564e-06	5.5559e-06	5.9235e-06	6.3733e-06
K01021	6.4829e-06	4.5368e-06	5.9292e-06	3.8932e-06	3.8512e-06	3.4973e-06	6.7543e-06	6.77e-06	6.7173e-06	4.8817e-06	3.7862e-06	5.0199e-06	6.6429e-06	3.8439e-06	6.1987e-06	6.0969e-06	6.5041e-06	5.8483e-06	5.035e-06	6.663e-06
K01022	4.7149e-06	6.3515e-06	4.7434e-06	4.1927e-06	3.5549e-06	5.246e-06	5.5262e-06	5.5926e-06	5.3178e-06	3.733e-06	4.0774e-06	8.2681e-06	5.4876e-06	5.9137e-06	5.018e-06	4.157e-06	2.9564e-06	5.2635e-06	7.1082e-06	4.3454e-06
K01023	8.3394e-05	9.6482e-05	9.8721e-05	6.7084e-05	5.0954e-05	6.4409e-05	9.7323e-05	6.2107e-05	5.8216e-05	2.0675e-05	6.2909e-05	2.3328e-05	8.3758e-06	8.8114e-05	4.5753e-05	1.1085e-05	0.00010643	7.0764e-05	7.6709e-05	3.4184e-05
K01024	6.4829e-06	3.6294e-06	7.115e-06	6.2891e-06	3.5549e-06	6.1204e-06	8.9033e-06	4.7096e-06	5.3178e-06	7.1789e-06	4.6599e-06	5.0199e-06	5.7764e-06	4.1396e-06	6.4939e-06	4.9884e-06	4.139e-06	3.2166e-06	4.1465e-06	8.1114e-06
K01025	2.6521e-06	5.7466e-06	5.3363e-06	5.3906e-06	7.9986e-06	6.7032e-06	7.0613e-06	4.7096e-06	7.5569e-06	6.8918e-06	5.8249e-06	4.7246e-06	4.9099e-06	5.618e-06	7.6746e-06	4.9884e-06	3.252e-06	4.0938e-06	6.2197e-06	6.0836e-06
K01026	3.7719e-05	6.5632e-05	9.6053e-05	1.8867e-05	5.1547e-05	5.9163e-05	9.7937e-05	3.8265e-05	6.8012e-05	4.7955e-05	2.5921e-05	3.3072e-05	6.4407e-05	7.333e-05	8.0288e-05	4.3787e-05	3.9024e-05	2.0761e-05	5.8643e-05	3.9978e-05
K01027	1.385e-05	5.8676e-05	4.2097e-05	6.7383e-05	2.8143e-05	5.3626e-05	7.9516e-05	1.1774e-05	1.5674e-05	1.9527e-05	6.6986e-05	7.8842e-05	5.3432e-05	2.6612e-05	4.5162e-05	1.5797e-05	3.4886e-05	2.5732e-05	2.9321e-05	7.3292e-05
K01028	0.00010874	6.5027e-05	8.2712e-05	9.4636e-05	0.00010398	0.00013086	9.7323e-05	0.00010508	5.4578e-05	8.1553e-05	0.00010863	0.00011398	6.9606e-05	9.6689e-05	9.2981e-05	0.00011861	0.00011382	0.00010381	7.0194e-05	0.00010197
K01029	0.00011492	0.00010162	8.3305e-05	0.0001168	0.00013953	0.00014223	0.00016241	0.00011362	5.8496e-05	0.00011027	0.00011125	0.00018928	0.00012217	8.3383e-05	0.00014818	0.00012776	0.0001289	9.6497e-05	8.2337e-05	0.0001463
K01031	2.9763e-05	6.3515e-06	1.6305e-05	1.4675e-05	2.5181e-05	2.4481e-05	3.7455e-05	2.9729e-05	1.9592e-05	1.3784e-05	1.8057e-05	3.5435e-05	1.0975e-05	3.2525e-05	2.8632e-05	3.2425e-05	2.3356e-05	3.3335e-05	2.1917e-05	1.2747e-05
K01032	3.6246e-05	6.6539e-06	2.0159e-05	1.3477e-05	3.0513e-05	3.235e-05	5.0657e-05	2.9435e-05	2.351e-05	1.3209e-05	1.7475e-05	4.2817e-05	1.1842e-05	2.9864e-05	3.7488e-05	3.0762e-05	1.5965e-05	4.2108e-05	2.9025e-05	1.4195e-05
K01034	5.5989e-05	0.00013368	7.3522e-05	0.00010482	0.00011228	4.7506e-05	8.6884e-05	6.5934e-05	7.1931e-05	9.2177e-05	0.00010223	0.00010867	0.00012102	5.411e-05	0.00011896	8.3694e-05	6.5041e-05	4.2985e-05	8.2337e-05	0.00012109
K01035	1.0903e-05	3.1153e-05	2.3717e-05	2.1862e-05	2.5773e-05	1.3115e-05	7.3683e-06	1.4423e-05	4.5062e-05	1.8378e-05	3.8444e-05	2.3918e-05	1.9062e-05	1.5671e-05	2.2434e-05	3.3256e-05	2.4242e-05	2.6025e-05	2.2213e-05	2.0858e-05
K01036	4.1255e-06	5.7466e-06	4.7434e-06	5.0912e-06	5.6286e-06	4.0802e-06	6.1402e-06	4.7096e-06	3.0787e-06	5.7431e-06	5.5336e-06	2.6576e-06	5.1988e-06	5.618e-06	5.6084e-06	6.0969e-06	5.6172e-06	4.3862e-06	5.035e-06	4.3454e-06
K01039	2.8879e-05	7.2588e-06	1.0673e-05	1.3776e-05	3.9697e-05	5.9455e-05	2.1491e-05	4.8273e-05	8.6765e-06	2.4121e-05	1.7183e-05	4.1341e-05	1.4441e-05	4.11e-05	6.4939e-06	3.6304e-05	4.9963e-05	2.8949e-05	2.6656e-05	1.5933e-05
K01040	2.2396e-05	7.5613e-06	1.2748e-05	1.4375e-05	3.1698e-05	5.0129e-05	2.1491e-05	4.268e-05	6.9971e-06	2.0101e-05	1.4271e-05	4.1341e-05	1.3286e-05	3.4004e-05	6.1987e-06	2.993e-05	5.3511e-05	2.427e-05	1.8955e-05	1.7382e-05
K01041	8.5752e-05	0.00012431	0.00014497	0.00013057	0.00010931	7.0238e-05	2.1798e-05	0.00013305	0.00012791	0.00013382	0.00014242	0.00011428	0.00013141	0.00013779	0.00013962	9.9491e-05	0.00011116	6.2577e-05	0.0001395	0.00015006
K01042	0.00017357	0.0002102	0.00023154	0.0001156	0.0002127	0.00025385	0.00011605	0.00016071	0.00030452	0.00022628	0.00023649	0.0001506	0.00017647	0.00021674	0.00021371	0.00026965	0.00027672	0.00021726	0.00025323	0.00019207
K01043	7.6911e-05	6.5027e-05	5.8106e-05	0.00010212	0.00011968	5.7415e-05	5.956e-05	7.3293e-05	9.712e-05	6.662e-05	0.00011824	8.0023e-05	6.8739e-05	7.9539e-05	8.7373e-05	0.00011529	6.1789e-05	0.00010878	8.7964e-05	8.6618e-05
K01044	6.2472e-05	9.6482e-05	8.2712e-05	8.4453e-05	6.8433e-05	9.7343e-05	8.2279e-05	8.5655e-05	6.3534e-05	0.00011515	8.1257e-05	0.00010512	0.00010484	9.7871e-05	7.7927e-05	6.8452e-05	9.8744e-05	6.8717e-05	0.00011669	9.6178e-05
K01045	4.1255e-06	6.6539e-06	5.3363e-06	3.8932e-06	5.6286e-06	7.2861e-06	8.5963e-06	6.1813e-06	5.8776e-06	5.7431e-06	4.6599e-06	7.9728e-06	4.9099e-06	3.8439e-06	6.7891e-06	7.7597e-06	9.1648e-06	5.2635e-06	6.2197e-06	6.9526e-06
K01046	0.00050331	0.00061246	0.00067089	0.00052139	0.00043281	0.00037596	0.00059867	0.00052571	0.00061379	0.00055048	0.0003958	0.00051705	0.00052074	0.00063099	0.00066563	0.00039769	0.00044642	0.00047283	0.0004724	0.0004751
K01047	7.6617e-06	6.9564e-06	8.0044e-06	5.3906e-06	2.9624e-06	5.5375e-06	5.5262e-06	4.7096e-06	5.0379e-06	4.5945e-06	5.2424e-06	4.4293e-06	6.6429e-06	4.7309e-06	7.9698e-06	2.2171e-06	5.9128e-06	7.0179e-06	5.9235e-06	6.3733e-06
K01048	0.00013349	0.00016211	0.00013726	0.00020544	0.00018752	7.0238e-05	8.8112e-05	0.00015659	0.00015478	0.00015018	0.00018348	0.00016093	0.00017127	0.00012123	0.00019128	0.0001854	0.00010259	0.00011463	0.00013209	0.00021003
K01049	6.7776e-06	5.1417e-06	4.7434e-06	3.8932e-06	4.7399e-06	3.4973e-06	6.7543e-06	5.5926e-06	5.5977e-06	5.1688e-06	2.9124e-06	4.4293e-06	4.9099e-06	5.0266e-06	6.4939e-06	6.0969e-06	3.5477e-06	5.2635e-06	4.4426e-06	4.0557e-06
K01050	3.8308e-06	7.2588e-06	5.9292e-06	6.2891e-06	4.4437e-06	5.246e-06	7.3683e-06	4.1209e-06	3.6385e-06	8.3276e-06	4.9511e-06	5.9058e-06	4.3323e-06	3.2525e-06	6.1987e-06	8.5911e-06	3.252e-06	4.6786e-06	4.7388e-06	4.9248e-06
K01051	9.4592e-05	0.00015395	0.00012036	0.00010871	9.7761e-05	7.6942e-05	0.00010377	8.0651e-05	0.0001419	5.0252e-05	0.00011883	5.581e-05	3.6102e-05	0.00010083	8.2355e-05	6.7066e-05	0.00012328	0.00010381	0.00010603	8.9226e-05
K01052	7.0723e-06	4.2343e-06	3.854e-06	4.1927e-06	4.1474e-06	4.0802e-06	4.2982e-06	5.887e-06	4.1983e-06	5.456e-06	4.9511e-06	4.4293e-06	4.9099e-06	6.8007e-06	6.1987e-06	3.8799e-06	5.3215e-06	5.5559e-06	5.3312e-06	5.2145e-06
K01053	8.8404e-06	4.1738e-05	2.6681e-05	4.4623e-05	1.896e-05	4.1968e-05	4.9736e-05	1.0008e-05	1.2315e-05	1.3209e-05	5.0385e-05	5.4038e-05	3.9568e-05	1.6854e-05	3.306e-05	7.7597e-06	2.779e-05	2.4563e-05	1.9548e-05	4.5772e-05
K01054	4.7149e-06	6.3515e-06	5.9292e-06	2.6953e-06	5.0362e-06	4.6631e-06	5.8332e-06	6.1813e-06	3.3586e-06	6.0303e-06	5.2424e-06	6.2011e-06	4.0435e-06	6.5051e-06	5.3132e-06	4.4341e-06	5.3215e-06	5.2635e-06	5.6273e-06	3.766e-06
K01055	0.00015647	2.1172e-05	6.7e-05	0.00012309	0.00019819	0.00016816	0.00012987	0.00019633	4.954e-05	0.00010711	0.00012494	0.00016064	8.4913e-05	0.00020846	9.6228e-05	0.00018457	0.00015521	0.00018013	0.00013683	0.00011356
K01056	0.00036393	0.0003575	0.00036287	0.00030247	0.00028825	0.00034507	0.00034355	0.00029906	0.00034594	0.0003578	0.00033435	0.00031389	0.00034543	0.00031668	0.00034329	0.00029875	0.00027938	0.00035645	0.00034208	0.00032533
K01057	0.00019272	0.00011191	0.00014734	0.00014195	0.00014249	0.00012357	0.00012066	0.00016954	0.00014834	0.00013468	0.00014591	0.00011191	8.7801e-05	0.00013897	0.00012102	0.00015131	0.00014693	0.00016814	9.6849e-05	0.0001434
K01058	0.00015205	8.5896e-05	0.00014764	6.319e-05	0.00010694	0.00011658	0.00017162	6.8583e-05	0.00016317	0.00012089	0.0001232	0.00011132	9.6177e-05	0.00011946	0.00012781	0.00016018	0.00014043	0.00014708	9.4776e-05	0.00015093
K01059	4.7149e-06	4.8392e-06	6.5221e-06	6.5886e-06	5.9249e-06	9.3263e-06	6.4472e-06	4.4152e-06	5.0379e-06	5.456e-06	4.6599e-06	5.6105e-06	3.4658e-06	4.1396e-06	3.8373e-06	5.8198e-06	5.6172e-06	5.8483e-06	3.2579e-06	4.9248e-06
K01060	8.1037e-05	8.6199e-05	8.6863e-05	3.6836e-05	6.9914e-05	0.00015621	7.1841e-05	8.3301e-05	0.00012623	7.5809e-05	4.4851e-05	3.3072e-05	8.4335e-05	8.9001e-05	8.7668e-05	0.00012637	4.612e-05	8.2168e-05	7.5821e-05	3.5922e-05
K01061	8.1626e-05	4.2343e-05	6.9075e-05	5.1211e-05	0.00014101	0.00013494	9.763e-05	0.00012922	8.7884e-05	7.0928e-05	8.0383e-05	0.00014912	5.3143e-05	0.00011206	7.1433e-05	0.00012859	0.00013097	0.00011784	8.9149e-05	7.7348e-05
K01062	4.4202e-06	5.1417e-06	3.854e-06	4.4922e-06	5.6286e-06	6.7032e-06	7.9823e-06	4.1209e-06	6.7173e-06	4.8817e-06	6.6986e-06	5.9058e-06	4.6211e-06	7.3921e-06	3.5421e-06	3.8799e-06	4.4346e-06	5.2635e-06	5.3312e-06	7.2423e-06
K01063	5.0096e-06	5.7466e-06	3.854e-06	3.2943e-06	6.8136e-06	6.9947e-06	6.4472e-06	7.6531e-06	5.8776e-06	5.7431e-06	5.5336e-06	5.0199e-06	7.7981e-06	5.618e-06	5.018e-06	4.7113e-06	4.4346e-06	4.6786e-06	2.9618e-06	6.0836e-06
K01064	6.7776e-06	5.1417e-06	5.3363e-06	5.0912e-06	5.6286e-06	4.3717e-06	8.2893e-06	3.8265e-06	5.8776e-06	6.0303e-06	4.6599e-06	6.2011e-06	4.0435e-06	3.8439e-06	6.4939e-06	8.314e-06	5.6172e-06	5.8483e-06	9.4776e-06	4.6351e-06
K01065	6.1883e-06	6.9564e-06	7.4115e-06	4.4922e-06	5.3324e-06	4.0802e-06	6.4472e-06	5.5926e-06	4.7581e-06	6.0303e-06	4.3686e-06	4.1341e-06	6.0652e-06	5.618e-06	5.9036e-06	4.9884e-06	4.7302e-06	5.5559e-06	3.8503e-06	4.3454e-06
K01066	0.00010491	6.049e-05	6.9372e-05	0.00012009	0.00010339	3.8762e-05	3.1315e-05	0.00010155	0.00011839	7.2076e-05	0.00011621	7.8547e-05	7.9714e-05	7.3921e-05	0.00010538	0.0001466	4.8189e-05	0.00010849	6.9897e-05	0.00011617
K01067	6.925e-05	1.2098e-05	1.2451e-05	8.3555e-05	7.8801e-05	2.011e-05	1.5351e-05	4.4741e-05	8.9563e-06	3.3885e-05	7.8636e-05	2.8348e-05	4.159e-05	6.0615e-05	4.7524e-05	7.0946e-05	1.8921e-05	5.5851e-05	4.5907e-05	5.0986e-05
K01068	7.0723e-06	4.2343e-06	3.854e-06	7.7865e-06	4.7399e-06	3.7888e-06	6.4472e-06	5.0039e-06	3.9184e-06	3.733e-06	6.1161e-06	3.5435e-06	4.9099e-06	3.8439e-06	5.018e-06	7.4826e-06	7.6866e-06	6.7255e-06	5.9235e-06	4.6351e-06
K01069	0.00020775	7.6823e-05	0.00010761	0.00017579	0.00024085	0.00015009	0.00021	0.00017631	0.00012175	0.00016282	0.00017795	0.00018958	0.00016318	0.00020846	0.00016707	0.00024887	0.00015521	0.00021639	0.00016793	0.0001799
K01070	0.00018565	8.015e-05	0.00012066	0.00015393	0.00018812	0.00014397	0.00013509	0.00013775	0.00018305	0.0001565	0.00019251	0.0001627	0.00016203	0.00016085	0.00014228	0.00020785	0.00018182	0.00017662	0.00016764	0.00016889
K01071	0.00010491	2.4196e-05	6.5518e-05	3.7734e-05	5.7768e-05	9.268e-05	7.0306e-05	5.887e-05	7.417e-05	5.3124e-05	5.7666e-05	5.6991e-05	7.105e-05	5.0266e-05	6.7596e-05	4.8221e-05	5.6172e-05	4.6786e-05	7.7006e-05	3.0708e-05
K01072	5.3042e-06	3.9319e-06	6.2257e-06	4.1927e-06	5.3324e-06	3.4973e-06	5.5262e-06	5.5926e-06	6.4374e-06	6.8918e-06	6.1161e-06	5.9058e-06	5.4876e-06	6.2094e-06	5.6084e-06	4.7113e-06	4.139e-06	7.3104e-06	4.1465e-06	5.2145e-06
K01073	9.1351e-06	3.206e-05	2.6978e-05	1.9167e-05	2.0441e-05	1.2824e-05	4.9122e-06	1.825e-05	1.5674e-05	2.929e-05	3.0289e-05	1.7717e-05	2.5416e-05	3.1343e-05	2.1843e-05	5.5427e-06	2.9564e-05	7.3104e-06	3.3172e-05	2.4914e-05
K01074	5.8936e-06	6.049e-06	4.4469e-06	3.2943e-06	4.4437e-06	5.246e-06	6.7543e-06	4.4152e-06	2.519e-06	4.3074e-06	5.2424e-06	5.9058e-06	7.2205e-06	6.5051e-06	4.7228e-06	3.8799e-06	5.6172e-06	7.3104e-06	3.8503e-06	4.9248e-06
K01075	1.7681e-05	6.6539e-06	1.1562e-05	1.3477e-05	2.2515e-05	3.5265e-05	1.2587e-05	3.0024e-05	3.3586e-06	1.8091e-05	8.4461e-06	2.8052e-05	1.213e-05	2.0698e-05	7.3794e-06	1.8845e-05	3.3703e-05	1.4036e-05	1.5105e-05	1.0139e-05
K01076	0.00011905	4.2646e-05	7.619e-05	8.9545e-05	0.00013331	0.0001192	0.00017008	0.00011097	6.5213e-05	5.5996e-05	0.00011242	0.00013495	7.9425e-05	0.00012744	0.0001225	0.00010753	8.0118e-05	0.0001351	0.00010573	9.7337e-05
K01077	0.00025195	0.00045549	0.00046752	0.00027073	0.00033861	0.00033225	0.00029074	0.0002917	0.00041647	0.00035895	0.00036172	0.00026133	0.00032954	0.00045476	0.00035894	0.00023445	0.000502	0.00029972	0.00046825	0.00027318
K01078	7.0723e-06	5.4441e-06	5.6327e-06	4.4922e-06	5.3324e-06	5.5375e-06	4.2982e-06	3.8265e-06	4.4782e-06	5.456e-06	5.5336e-06	6.2011e-06	5.1988e-06	5.618e-06	4.7228e-06	2.7713e-06	4.4346e-06	4.0938e-06	6.5159e-06	5.2145e-06
K01079	0.00035214	0.00021656	0.00027838	0.00026204	0.00027018	0.00029873	0.00026587	0.00032673	0.00030536	0.00024236	0.00029124	0.00026428	0.00020131	0.00029154	0.00023644	0.0002993	0.00028559	0.00035148	0.00024346	0.00025435
K01080	7.0723e-06	6.3515e-06	5.9292e-06	4.1927e-06	3.5549e-06	7.5776e-06	8.2893e-06	2.0604e-06	5.8776e-06	6.6046e-06	4.3686e-06	6.4964e-06	3.4658e-06	5.0266e-06	5.6084e-06	4.7113e-06	5.3215e-06	4.971e-06	5.3312e-06	4.6351e-06
K01081	0.00037395	0.00065209	0.00059351	0.00057889	0.00041771	0.0004905	0.0003899	0.00044476	0.00035797	0.00037216	0.00069025	0.00044352	0.00051179	0.00053519	0.00038963	0.0001854	0.00049727	0.00052459	0.00052216	0.00045395
K01082	0.00012612	8.2872e-05	9.9018e-05	0.00012099	0.00014634	0.00012182	9.5481e-05	0.00013511	9.2642e-05	8.4424e-05	0.0001331	0.00011575	6.6717e-05	0.00014252	9.4457e-05	0.00013275	0.00014309	0.0001465	0.00012439	9.6758e-05
K01083	4.1255e-06	6.6539e-06	6.2257e-06	4.7917e-06	6.8136e-06	3.2059e-06	7.3683e-06	7.0644e-06	6.1575e-06	3.733e-06	5.8249e-06	5.3152e-06	5.1988e-06	5.618e-06	5.3132e-06	6.0969e-06	5.0259e-06	4.6786e-06	3.5541e-06	3.766e-06
K01084	5.8936e-06	6.3515e-06	4.7434e-06	8.3854e-06	5.0362e-06	4.6631e-06	8.9033e-06	3.8265e-06	5.5977e-06	3.733e-06	4.6599e-06	3.5435e-06	5.1988e-06	7.3921e-06	6.1987e-06	6.0969e-06	4.139e-06	6.4331e-06	4.4426e-06	4.9248e-06
K01085	2.0038e-05	5.8978e-05	4.0615e-05	3.2643e-05	5.5398e-05	2.4481e-05	1.443e-05	2.1487e-05	8.9004e-05	2.9864e-05	6.9898e-05	3.8388e-05	3.9857e-05	2.7203e-05	4.5162e-05	6.2078e-05	4.7302e-05	3.6552e-05	3.2579e-05	5.2724e-05
K01087	0.00010903	5.4441e-05	9.3088e-05	0.0001126	0.00011642	7.1404e-05	6.5394e-05	0.00012039	0.00013043	7.6384e-05	0.00011737	9.7445e-05	8.0581e-05	0.0001026	0.00012634	0.00015824	5.1441e-05	0.00012866	8.5002e-05	0.00010719
K01089	5.2453e-05	9.9809e-05	8.8642e-05	7.487e-05	6.9321e-05	5.3626e-05	6.1709e-05	6.093e-05	0.0001002	4.0776e-05	8.9994e-05	4.4884e-05	3.1481e-05	6.5938e-05	7.0548e-05	5.2378e-05	9.3718e-05	7.1349e-05	8.0856e-05	6.1705e-05
K01090	0.00037247	0.00054472	0.00053511	0.0005211	0.00035046	0.00037596	0.00037241	0.00042563	0.00042207	0.00046749	0.00052424	0.0004261	0.00052941	0.00040243	0.00041709	0.00025718	0.00038699	0.00039183	0.00042531	0.00047539
K01091	0.00062089	0.00043341	0.00055557	0.00046809	0.00067307	0.00058639	0.00063367	0.00058781	0.00051135	0.00054043	0.00054375	0.00058142	0.00050659	0.00067978	0.00054785	0.0005914	0.00062291	0.00059769	0.00063767	0.00051652
K01092	0.0004762	0.00042222	0.0004604	0.00046779	0.00040971	0.00042638	0.00050596	0.00040914	0.0004537	0.00045112	0.00044415	0.00037354	0.00042485	0.00049172	0.00041059	0.00041598	0.00044405	0.0004974	0.00047477	0.00043686
K01093	2.2101e-05	5.9281e-05	4.0319e-05	4.4024e-05	5.5102e-05	2.827e-05	1.3202e-05	2.4725e-05	8.7884e-05	3.13e-05	7.0772e-05	3.8683e-05	4.3612e-05	2.7499e-05	5.2837e-05	6.1801e-05	4.9963e-05	3.9476e-05	3.8799e-05	5.4173e-05
K01095	0.00010255	5.2022e-05	7.3522e-05	6.5886e-05	9.628e-05	9.064e-05	9.4253e-05	8.5655e-05	8.2286e-05	8.2701e-05	0.00010077	7.648e-05	6.4118e-05	8.8114e-05	7.5861e-05	0.00011085	0.00011234	0.00010205	7.5821e-05	9.0964e-05
K01096	1.827e-05	4.446e-05	2.3124e-05	2.6953e-05	3.4068e-05	1.8361e-05	1.3509e-05	1.4129e-05	5.3458e-05	2.1824e-05	5.2424e-05	2.008e-05	2.946e-05	1.9219e-05	3.4536e-05	3.963e-05	2.7199e-05	2.661e-05	1.9548e-05	3.5343e-05
K01097	6.7776e-06	4.5368e-06	4.4469e-06	5.6901e-06	7.7024e-06	5.246e-06	3.9912e-06	4.7096e-06	5.5977e-06	6.0303e-06	4.6599e-06	7.3822e-06	4.6211e-06	3.5482e-06	9.1505e-06	3.6027e-06	4.4346e-06	4.6786e-06	4.4426e-06	6.0836e-06
K01098	4.4202e-06	3.9319e-06	4.7434e-06	5.0912e-06	3.8512e-06	2.623e-06	5.8332e-06	5.887e-06	4.1983e-06	5.7431e-06	4.6599e-06	6.4964e-06	4.6211e-06	3.8439e-06	7.3794e-06	3.6027e-06	5.0259e-06	6.1407e-06	5.6273e-06	4.9248e-06
K01099	4.1255e-06	6.049e-06	6.8186e-06	5.6901e-06	5.3324e-06	4.6631e-06	5.2192e-06	5.2983e-06	5.8776e-06	6.3175e-06	5.2424e-06	6.7917e-06	6.354e-06	3.8439e-06	3.8373e-06	5.2655e-06	6.2084e-06	4.6786e-06	4.7388e-06	2.6072e-06
K01100	7.367e-06	8.7711e-06	5.6327e-06	3.8932e-06	5.0362e-06	5.246e-06	3.9912e-06	3.8265e-06	5.0379e-06	6.3175e-06	4.6599e-06	5.0199e-06	4.9099e-06	6.8007e-06	4.7228e-06	5.8198e-06	4.4346e-06	5.2635e-06	4.4426e-06	5.7939e-06
K01101	0.00010461	7.6823e-05	0.00010465	6.3789e-05	8.2652e-05	0.00012212	7.6753e-05	7.8002e-05	8.8164e-05	9.9069e-05	8.8247e-05	7.8842e-05	0.00010455	9.1071e-05	9.3276e-05	5.7367e-05	0.00010525	5.3804e-05	0.00012499	5.9967e-05
K01102	5.5989e-06	4.2343e-06	7.115e-06	5.6901e-06	5.0362e-06	5.5375e-06	7.0613e-06	5.5926e-06	4.4782e-06	4.8817e-06	5.2424e-06	3.8388e-06	4.6211e-06	5.9137e-06	3.8373e-06	4.4341e-06	6.7997e-06	5.8483e-06	3.2579e-06	7.8217e-06
K01103	2.9468e-06	7.2588e-06	4.1504e-06	2.9948e-06	5.0362e-06	5.8289e-06	7.3683e-06	4.4152e-06	4.1983e-06	6.8918e-06	5.2424e-06	8.2681e-06	4.6211e-06	7.0964e-06	4.4277e-06	2.7713e-06	4.139e-06	6.4331e-06	4.4426e-06	6.9526e-06
K01104	0.00050921	0.00062607	0.00067148	0.00054176	0.00050717	0.00059805	0.00060973	0.00052835	0.00060399	0.00063088	0.0005056	0.00051233	0.00066891	0.00063838	0.00057825	0.0005163	0.00056112	0.00053863	0.00069127	0.00053738
K01106	6.1883e-06	5.4441e-06	3.2611e-06	5.3906e-06	4.4437e-06	4.3717e-06	6.7543e-06	5.0039e-06	4.1983e-06	4.5945e-06	6.9898e-06	5.6105e-06	6.354e-06	4.1396e-06	6.7891e-06	3.0485e-06	5.9128e-06	5.8483e-06	4.4426e-06	6.3733e-06
K01107	6.1883e-06	5.4441e-06	5.0398e-06	6.888e-06	5.9249e-06	4.3717e-06	3.9912e-06	2.9435e-06	6.7173e-06	2.8716e-06	4.6599e-06	5.6105e-06	8.0869e-06	1.4784e-06	4.4277e-06	3.3256e-06	4.139e-06	3.8014e-06	6.5159e-06	6.3733e-06
K01108	5.3042e-06	5.7466e-06	6.8186e-06	5.3906e-06	4.7399e-06	3.2059e-06	4.2982e-06	3.8265e-06	6.4374e-06	4.5945e-06	6.1161e-06	8.5634e-06	5.4876e-06	6.2094e-06	5.3132e-06	6.6512e-06	4.7302e-06	4.971e-06	3.8503e-06	2.6072e-06
K01109	5.3042e-06	6.6539e-06	4.1504e-06	6.5886e-06	5.6286e-06	4.0802e-06	5.5262e-06	4.4152e-06	6.4374e-06	6.8918e-06	4.9511e-06	4.1341e-06	4.0435e-06	6.2094e-06	5.6084e-06	6.3741e-06	3.252e-06	6.1407e-06	5.6273e-06	3.4763e-06
K01110	2.9468e-06	3.6294e-06	5.0398e-06	3.8932e-06	3.8512e-06	5.8289e-06	4.9122e-06	3.2378e-06	4.1983e-06	4.0202e-06	6.6986e-06	5.3152e-06	6.0652e-06	5.9137e-06	5.018e-06	5.8198e-06	5.6172e-06	4.0938e-06	5.6273e-06	2.0279e-06
K01111	6.7776e-06	4.2343e-06	4.7434e-06	4.4922e-06	4.4437e-06	3.4973e-06	4.9122e-06	3.2378e-06	5.8776e-06	4.8817e-06	5.8249e-06	5.9058e-06	5.1988e-06	4.4353e-06	5.6084e-06	3.6027e-06	6.2084e-06	6.1407e-06	5.035e-06	6.0836e-06
K01112	2.5342e-05	6.6237e-05	4.5655e-05	4.1628e-05	6.2508e-05	2.419e-05	1.2587e-05	2.5314e-05	9.6001e-05	3.5033e-05	7.7762e-05	4.5475e-05	4.5634e-05	3.0455e-05	5.874e-05	6.8175e-05	5.2033e-05	4.4739e-05	4.7092e-05	5.9097e-05
K01113	0.00010785	9.9809e-06	5.4252e-05	4.4323e-05	0.00013153	0.00015621	0.00011482	0.00014129	4.4502e-05	6.5185e-05	5.2133e-05	0.00015148	4.3323e-05	0.00012951	7.2023e-05	0.00010836	0.00013511	0.00012398	9.1814e-05	4.8089e-05
K01114	0.00030853	0.00015455	0.00022264	0.00020994	0.00037386	0.00046311	0.00037916	0.00047331	0.00018361	0.0002863	0.00020038	0.00046065	0.00020824	0.00043288	0.00021312	0.00033505	0.00044849	0.00036903	0.00033705	0.00020076
K01115	6.4829e-05	1.2703e-05	1.1562e-05	8.0261e-05	6.9914e-05	2.011e-05	1.8421e-05	4.8273e-05	1.1475e-05	3.733e-05	7.7762e-05	2.6281e-05	4.7655e-05	6.0024e-05	4.5162e-05	7.6212e-05	2.0695e-05	5.4974e-05	4.5019e-05	5.2724e-05
K01116	5.0096e-06	6.9564e-06	8.3009e-06	5.9896e-06	5.6286e-06	5.5375e-06	8.5963e-06	2.9435e-06	4.7581e-06	5.7431e-06	2.9124e-06	7.6775e-06	4.3323e-06	5.3223e-06	5.6084e-06	7.2055e-06	7.6866e-06	6.7255e-06	5.9235e-06	6.0836e-06
K01117	1.385e-05	5.3534e-05	4.5951e-05	2.905e-05	3.5253e-05	1.9527e-05	3.3771e-06	2.6491e-05	2.407e-05	4.4797e-05	5.2133e-05	3.071e-05	4.5922e-05	5.4997e-05	3.0698e-05	8.314e-06	5.4398e-05	6.7255e-06	5.1238e-05	4.3744e-05
K01118	0.00021423	0.00027977	0.00026266	0.00025306	0.00030513	0.00032729	0.00026464	0.00031289	0.00022783	0.0003064	0.00026649	0.00031242	0.00031424	0.00033738	0.00025179	0.00031676	0.00035861	0.0002582	0.00035038	0.0002868
K01119	0.00051834	0.00083386	0.00066822	0.00071785	0.00065115	0.000552	0.00050626	0.00053336	0.0005872	0.00060447	0.00075985	0.00056637	0.0007284	0.00058339	0.00073263	0.00059445	0.00055226	0.00055266	0.0006276	0.00070511
K01120	5.0096e-06	4.2343e-06	2.3717e-06	3.2943e-06	4.7399e-06	5.8289e-06	4.9122e-06	7.9474e-06	3.0787e-06	5.7431e-06	4.9511e-06	4.7246e-06	5.1988e-06	5.618e-06	8.5602e-06	4.9884e-06	2.0695e-06	4.6786e-06	5.6273e-06	3.1866e-06
K01121	4.4202e-06	5.4441e-06	5.3363e-06	6.888e-06	5.6286e-06	4.6631e-06	7.0613e-06	6.1813e-06	5.5977e-06	6.0303e-06	6.4073e-06	5.9058e-06	4.9099e-06	5.9137e-06	3.247e-06	3.8799e-06	5.9128e-06	3.509e-06	5.6273e-06	6.9526e-06
K01122	3.8308e-06	3.9319e-06	6.8186e-06	3.2943e-06	6.2211e-06	7.869e-06	6.1402e-06	6.1813e-06	4.7581e-06	4.3074e-06	4.6599e-06	6.4964e-06	5.1988e-06	2.0698e-06	6.4939e-06	3.3256e-06	5.6172e-06	4.3862e-06	7.1082e-06	6.663e-06
K01124	1.7681e-06	6.3515e-06	6.2257e-06	5.0912e-06	5.0362e-06	3.2059e-06	6.7543e-06	5.5926e-06	4.7581e-06	3.733e-06	2.9124e-06	6.4964e-06	4.9099e-06	7.0964e-06	3.8373e-06	6.9283e-06	5.9128e-06	3.509e-06	3.8503e-06	6.9526e-06
K01125	4.7149e-06	6.6539e-06	6.2257e-06	5.6901e-06	3.2587e-06	6.7032e-06	5.8332e-06	5.5926e-06	4.7581e-06	8.0404e-06	4.3686e-06	7.6775e-06	3.4658e-06	6.8007e-06	6.4939e-06	4.4341e-06	3.8433e-06	4.6786e-06	3.8503e-06	5.5042e-06
K01126	0.00090584	0.0011944	0.0013053	0.00102	0.0010283	0.0011935	0.0011722	0.0010443	0.0012623	0.0011317	0.0011032	0.0011109	0.0011408	0.0011464	0.0011624	0.00097828	0.0012177	0.0010299	0.0013052	0.0010655
K01127	5.0096e-06	4.5368e-06	5.0398e-06	6.2891e-06	2.37e-06	6.1204e-06	5.2192e-06	5.0039e-06	4.7581e-06	4.8817e-06	4.9511e-06	3.2482e-06	4.9099e-06	5.9137e-06	6.7891e-06	5.2655e-06	5.3215e-06	2.6317e-06	5.6273e-06	6.9526e-06
K01128	4.2434e-05	7.5613e-06	1.4527e-05	5.4206e-05	5.2139e-05	1.0492e-05	1.3509e-05	2.9729e-05	6.1575e-06	2.9003e-05	4.6016e-05	1.5946e-05	3.0326e-05	4.11e-05	3.4831e-05	4.545e-05	1.5078e-05	4.3862e-05	3.1987e-05	3.8819e-05
K01129	0.00049712	0.00044188	0.00036702	0.0006924	0.00057234	0.00049517	0.00049214	0.00063049	0.00036021	0.00043131	0.00059821	0.00056902	0.00046789	0.00047812	0.00043303	0.00054207	0.00049401	0.00057225	0.0004493	0.00059126
K01130	0.00020863	0.00017089	0.00018529	0.00015154	0.00023374	0.00025472	0.00021614	0.00022547	0.00020068	0.00012175	0.00018436	0.00019725	9.791e-05	0.00023655	0.00017563	0.00018928	0.00028263	0.00024036	0.00020792	0.00014543
K01131	5.0096e-06	5.7466e-06	5.0398e-06	4.7917e-06	8.2949e-06	4.3717e-06	6.1402e-06	4.7096e-06	4.4782e-06	4.3074e-06	7.5723e-06	5.3152e-06	4.3323e-06	4.7309e-06	6.7891e-06	8.0369e-06	5.6172e-06	6.4331e-06	5.3312e-06	4.3454e-06
K01132	5.8936e-06	6.049e-06	5.0398e-06	6.2891e-06	5.6286e-06	6.7032e-06	6.7543e-06	5.0039e-06	4.4782e-06	4.0202e-06	3.7862e-06	5.9058e-06	5.1988e-06	8.2792e-06	3.5421e-06	5.5427e-06	4.4346e-06	6.1407e-06	6.812e-06	5.7939e-06
K01133	9.9896e-05	1.9962e-05	2.4903e-05	8.4753e-05	0.00013005	0.00010405	4.728e-05	0.00013923	1.3155e-05	7.2938e-05	9.6401e-05	7.7956e-05	6.3251e-05	0.00011561	4.7819e-05	0.00011529	0.0001088	9.7082e-05	8.5002e-05	8.0535e-05
K01134	5.5989e-06	5.1417e-06	5.6327e-06	4.4922e-06	5.0362e-06	6.7032e-06	8.2893e-06	4.1209e-06	3.9184e-06	5.1688e-06	5.8249e-06	4.7246e-06	5.1988e-06	5.9137e-06	6.4939e-06	4.7113e-06	5.9128e-06	5.2635e-06	3.8503e-06	2.6072e-06
K01135	5.0096e-06	5.4441e-06	6.8186e-06	4.7917e-06	7.4061e-06	6.4118e-06	4.2982e-06	3.8265e-06	3.6385e-06	6.6046e-06	3.7862e-06	4.4293e-06	2.5994e-06	6.8007e-06	4.7228e-06	4.7113e-06	4.7302e-06	7.3104e-06	8.2929e-06	4.9248e-06
K01136	4.7149e-06	1.8147e-06	6.5221e-06	5.6901e-06	7.9986e-06	5.246e-06	7.3683e-06	6.1813e-06	5.0379e-06	5.7431e-06	4.0774e-06	7.9728e-06	6.9317e-06	6.8007e-06	5.018e-06	5.2655e-06	2.0695e-06	2.0469e-06	5.035e-06	2.6072e-06
K01137	6.4829e-06	4.8392e-06	5.3363e-06	4.7917e-06	4.7399e-06	5.246e-06	5.5262e-06	5.2983e-06	6.7173e-06	6.0303e-06	6.6986e-06	7.6775e-06	4.0435e-06	5.3223e-06	5.6084e-06	5.2655e-06	3.5477e-06	6.1407e-06	4.4426e-06	7.8217e-06
K01138	4.597e-05	0.00013157	8.9531e-05	9.5834e-05	0.00012146	5.5958e-05	2.2105e-05	4.9745e-05	0.00021243	7.2364e-05	0.00015727	8.5043e-05	8.3758e-05	5.4702e-05	9.5638e-05	0.00015215	0.00010909	9.2988e-05	8.5595e-05	0.00013355
K01139	0.00035656	0.00017663	0.00031217	0.0001725	0.00029624	0.00032438	0.00032175	0.00024961	0.00033027	0.00029032	0.00027348	0.00029854	0.00020131	0.00028652	0.00028367	0.00039297	0.00039645	0.0003316	0.00023546	0.0003317
K01141	6.2767e-05	7.3496e-05	6.1664e-05	6.3789e-05	0.00011731	0.00010492	4.2368e-05	0.00011892	9.4601e-05	6.8343e-05	8.9994e-05	9.6855e-05	5.6609e-05	7.7174e-05	4.7524e-05	0.0001272	0.00014161	8.8309e-05	8.6779e-05	7.2713e-05
K01142	0.0006368	0.0004077	0.00050813	0.00054655	0.00052021	0.00057531	0.00054218	0.00060371	0.00048812	0.00052923	0.00054229	0.00052532	0.00047338	0.00051035	0.00045516	0.00058974	0.0005085	0.00064243	0.00049728	0.00050088
K01143	5.0096e-06	4.2343e-06	5.9292e-06	6.888e-06	4.1474e-06	4.3717e-06	5.2192e-06	4.7096e-06	3.6385e-06	5.1688e-06	5.2424e-06	3.5435e-06	5.4876e-06	4.1396e-06	4.7228e-06	4.157e-06	4.7302e-06	5.8483e-06	4.7388e-06	5.2145e-06
K01144	0.00013378	8.6501e-05	8.9827e-05	0.00013686	0.00013301	6.1786e-05	8.934e-05	0.00010597	5.0379e-05	5.8867e-05	0.00012087	4.4589e-05	5.6609e-05	0.00011975	8.0879e-05	8.2586e-05	8.9579e-05	0.00012837	0.00011166	7.8217e-05
K01145	4.4202e-06	6.6539e-06	4.1504e-06	6.5886e-06	5.6286e-06	4.6631e-06	7.6753e-06	5.0039e-06	4.7581e-06	4.3074e-06	6.9898e-06	6.4964e-06	4.0435e-06	4.1396e-06	4.7228e-06	6.0969e-06	4.7302e-06	4.3862e-06	5.6273e-06	3.766e-06
K01146	1.4734e-05	3.5084e-05	2.6385e-05	2.8151e-05	3.4661e-05	1.6321e-05	6.1402e-06	1.7367e-05	5.5138e-05	1.8665e-05	4.0774e-05	3.1596e-05	2.7149e-05	2.1289e-05	3.0698e-05	4.0184e-05	2.8381e-05	1.9007e-05	2.9914e-05	3.7081e-05
K01147	0.00012082	0.0001482	0.00016394	0.00016921	9.1836e-05	9.2097e-05	0.00019188	4.533e-05	0.00019508	0.0001364	0.00019542	0.0001692	0.00016261	0.00011739	0.00014198	0.00016018	0.00015876	0.00015235	0.00012558	0.00025493
K01148	5.8936e-06	5.1417e-06	5.3363e-06	5.9896e-06	7.1099e-06	5.5375e-06	5.8332e-06	2.6491e-06	6.7173e-06	5.1688e-06	4.9511e-06	7.0869e-06	6.354e-06	5.3223e-06	7.6746e-06	3.6027e-06	6.2084e-06	4.3862e-06	6.2197e-06	3.766e-06
K01149	5.8936e-06	4.8392e-06	3.854e-06	6.888e-06	5.0362e-06	4.6631e-06	7.3683e-06	3.2378e-06	3.0787e-06	7.4661e-06	5.2424e-06	5.9058e-06	4.9099e-06	6.8007e-06	4.1325e-06	3.8799e-06	4.139e-06	7.0179e-06	5.3312e-06	5.2145e-06
K01150	3.1236e-05	4.3553e-05	2.9942e-05	3.4141e-05	5.9249e-05	5.5958e-05	2.4868e-05	6.6523e-05	5.4018e-05	3.8766e-05	4.9803e-05	5.9058e-05	3.6102e-05	4.8492e-05	3.1879e-05	6.8175e-05	7.8345e-05	5.4681e-05	4.413e-05	4.4903e-05
K01151	0.0001883	0.0003206	0.00028104	0.00023569	0.00020737	0.00016758	0.00022596	0.00020575	0.00028688	0.00025184	0.00021057	0.00019873	0.00026283	0.00022413	0.00027422	0.00021783	0.00021345	0.00022721	0.00025975	0.00025725
K01152	7.0723e-06	4.8392e-06	5.0398e-06	5.3906e-06	4.4437e-06	5.5375e-06	5.2192e-06	5.5926e-06	3.9184e-06	7.4661e-06	4.6599e-06	4.4293e-06	5.1988e-06	5.9137e-06	5.6084e-06	5.5427e-06	5.3215e-06	5.8483e-06	3.8503e-06	4.0557e-06
K01153	0.0018603	0.0016511	0.0017645	0.0012686	0.0013633	0.0016417	0.001501	0.0015336	0.0017076	0.0015053	0.0015124	0.0011354	0.0011146	0.0012697	0.0014738	0.0012682	0.00172	0.0014337	0.0013254	0.0012379
K01154	0.00076528	0.00082327	0.00080341	0.00054206	0.00059486	0.00071346	0.00067297	0.00065757	0.00075681	0.000653	0.00060054	0.00046685	0.00042716	0.00054849	0.00066208	0.00051436	0.00073555	0.00060764	0.00054852	0.0005116
K01155	0.00065154	0.00029852	0.00048115	0.00022042	0.00025299	0.00052577	0.00054802	0.0004112	0.00055389	0.00049104	0.00028571	0.00026281	0.00032521	0.0003081	0.00043303	0.00050992	0.00036068	0.00029826	0.00027396	0.00039601
K01156	0.00054309	0.00039077	0.00064184	0.00019706	0.00030158	0.00042726	0.00040955	0.00019662	0.0003535	0.00049506	0.00048288	0.0002693	0.0003437	0.00038321	0.00043332	0.00035806	0.00057679	0.00038452	0.0004179	0.00045887
K01157	6.0999e-05	4.8695e-05	5.3956e-05	1.4675e-05	2.2218e-05	5.3917e-05	2.3026e-05	1.56e-05	5.2898e-05	5.2837e-05	4.1065e-05	2.3623e-05	2.3394e-05	1.5376e-05	5.6084e-05	5.5149e-05	5.4989e-05	3.0119e-05	1.392e-05	4.3454e-05
K01158	5.0096e-06	5.7466e-06	4.7434e-06	7.1875e-06	6.8136e-06	5.246e-06	4.9122e-06	4.1209e-06	4.7581e-06	4.5945e-06	2.9124e-06	5.6105e-06	5.7764e-06	5.9137e-06	6.7891e-06	4.4341e-06	2.9564e-06	7.6028e-06	6.2197e-06	4.6351e-06
K01159	0.00017533	0.00013187	0.00016869	0.00016741	0.00015138	0.00013348	0.00015965	0.00016395	0.00016345	0.00013008	0.00017271	0.00015444	0.00010686	0.00013069	0.00013637	0.00014743	0.00015403	0.00019007	0.00011788	0.00018309
K01160	1.0608e-05	1.7542e-05	1.3934e-05	1.5273e-05	1.9552e-05	1.1075e-05	6.1402e-06	8.8304e-06	2.8548e-05	1.2635e-05	2.3591e-05	1.063e-05	1.7329e-05	1.2123e-05	2.2138e-05	1.9399e-05	1.833e-05	1.4036e-05	9.7738e-06	2.6942e-05
K01161	7.9563e-06	3.327e-06	4.7434e-06	4.7917e-06	5.6286e-06	5.246e-06	6.4472e-06	4.7096e-06	5.5977e-06	5.1688e-06	6.4073e-06	4.4293e-06	5.4876e-06	5.618e-06	4.4277e-06	5.5427e-06	5.0259e-06	4.3862e-06	5.6273e-06	6.3733e-06
K01163	7.8679e-05	8.3477e-05	7.8562e-05	4.2826e-05	4.5622e-05	5.9455e-05	5.5569e-05	4.5035e-05	6.8852e-05	4.7381e-05	5.6792e-05	3.071e-05	1.5307e-05	4.4057e-05	6.8776e-05	4.1293e-05	8.4553e-05	5.6436e-05	4.5907e-05	3.5922e-05
K01164	5.8936e-06	5.1417e-06	4.1504e-06	5.9896e-06	4.7399e-06	4.6631e-06	7.6753e-06	5.2983e-06	5.0379e-06	6.6046e-06	5.2424e-06	5.0199e-06	6.6429e-06	3.2525e-06	4.1325e-06	4.157e-06	5.3215e-06	6.1407e-06	4.4426e-06	5.5042e-06
K01165	5.5989e-06	3.327e-06	5.6327e-06	5.3906e-06	8.2949e-06	3.2059e-06	6.1402e-06	5.2983e-06	3.6385e-06	5.1688e-06	5.5336e-06	5.6105e-06	6.354e-06	6.2094e-06	7.3794e-06	4.4341e-06	4.139e-06	5.8483e-06	6.5159e-06	5.7939e-06
K01166	3.0057e-05	7.5613e-06	1.3637e-05	4.3125e-05	3.3772e-05	1.0492e-05	1.3202e-05	2.8257e-05	5.5977e-06	2.6131e-05	3.9027e-05	1.3288e-05	2.0506e-05	2.809e-05	1.6235e-05	3.7413e-05	1.0939e-05	3.0411e-05	2.1917e-05	2.6652e-05
K01167	2.7405e-05	1.361e-05	2.1049e-05	2.875e-05	1.5405e-05	1.1658e-05	1.2894e-05	3.2673e-05	2.8268e-05	1.9814e-05	1.5145e-05	2.0375e-05	1.964e-05	1.8332e-05	2.9813e-05	2.7713e-05	5.9128e-06	1.9592e-05	1.0958e-05	2.3175e-05
K01168	4.1255e-06	7.8637e-06	3.2611e-06	5.3906e-06	5.3324e-06	4.9546e-06	7.0613e-06	5.2983e-06	5.5977e-06	7.1789e-06	3.2037e-06	5.3152e-06	5.4876e-06	5.0266e-06	3.8373e-06	4.4341e-06	5.3215e-06	5.2635e-06	6.2197e-06	4.6351e-06
K01169	1.5913e-05	4.1133e-05	2.7571e-05	2.7253e-05	3.8512e-05	1.9235e-05	1.1973e-05	2.031e-05	5.9056e-05	2.2973e-05	4.5434e-05	2.3623e-05	2.946e-05	1.8037e-05	3.1289e-05	4.8221e-05	3.0155e-05	2.8949e-05	2.8729e-05	3.795e-05
K01170	3.2415e-06	4.8392e-06	5.0398e-06	2.6953e-06	4.1474e-06	6.1204e-06	5.8332e-06	5.2983e-06	4.7581e-06	6.3175e-06	4.6599e-06	7.0869e-06	4.9099e-06	5.618e-06	7.0843e-06	5.5427e-06	3.8433e-06	7.0179e-06	5.035e-06	7.8217e-06
K01172	5.8936e-06	6.6539e-06	5.6327e-06	6.2891e-06	5.6286e-06	2.3316e-06	3.6841e-06	4.1209e-06	5.0379e-06	4.3074e-06	3.2037e-06	5.3152e-06	5.7764e-06	3.8439e-06	4.1325e-06	6.3741e-06	4.4346e-06	5.2635e-06	6.812e-06	6.0836e-06
K01173	0.00014881	7.1983e-05	0.00011117	8.7149e-05	0.00016797	0.000218	0.00015658	0.00019427	8.2846e-05	9.6485e-05	0.00010106	0.00016979	5.2854e-05	0.00017002	8.9439e-05	0.00014272	0.00021138	0.0001582	0.00013239	7.7638e-05
K01174	6.0704e-05	0.00012854	0.00013696	5.6302e-05	5.599e-05	6.7324e-05	0.0001139	5.9753e-05	0.0001002	0.00010165	5.8249e-05	6.5554e-05	9.0689e-05	0.00012271	9.7704e-05	4.2401e-05	9.4605e-05	4.7371e-05	9.2999e-05	6.605e-05
K01175	0.00013437	0.0001969	0.00019626	0.00017789	0.00016293	9.4137e-05	9.6095e-05	0.00015041	0.0002379	0.00016454	0.00020241	0.00012993	0.00017445	0.0001783	0.00020013	0.00017044	0.00016201	0.00016024	0.00016941	0.00018598
K01176	0.00049948	0.00045731	0.00037384	0.00044712	0.00044911	0.00052431	0.00037056	0.00058458	0.00071203	0.00045916	0.00040337	0.00042138	0.00047424	0.00027853	0.00052837	0.00058143	0.00024036	0.00033715	0.000271	0.00040441
K01177	4.4202e-06	5.7466e-06	5.3363e-06	5.6901e-06	5.3324e-06	4.3717e-06	5.2192e-06	6.1813e-06	4.7581e-06	6.0303e-06	5.8249e-06	4.4293e-06	3.7547e-06	7.6878e-06	4.4277e-06	6.0969e-06	7.6866e-06	3.8014e-06	5.035e-06	4.9248e-06
K01178	5.0096e-06	5.1417e-06	5.3363e-06	5.9896e-06	6.5174e-06	4.9546e-06	5.8332e-06	4.1209e-06	4.1983e-06	6.0303e-06	4.0774e-06	3.2482e-06	6.9317e-06	5.3223e-06	6.7891e-06	3.6027e-06	4.4346e-06	4.3862e-06	5.035e-06	3.766e-06
K01179	0.00016708	0.00016181	0.000134	0.00028181	0.00021922	0.00012066	0.00015443	0.00014747	0.00011671	0.00010453	0.00026911	0.00013022	0.00014325	0.00016884	0.00017534	0.00018429	0.0001493	0.00019036	0.00018481	0.00020163
K01180	7.367e-06	3.6294e-06	5.3363e-06	4.1927e-06	4.4437e-06	3.4973e-06	6.1402e-06	4.7096e-06	4.1983e-06	5.7431e-06	4.0774e-06	7.6775e-06	4.6211e-06	5.0266e-06	4.4277e-06	6.3741e-06	5.6172e-06	5.2635e-06	4.1465e-06	5.5042e-06
K01181	7.0134e-05	9.618e-05	6.0774e-05	7.6367e-05	7.2284e-05	4.43e-05	8.7498e-05	5.4454e-05	4.5901e-05	4.3361e-05	5.4462e-05	5.64e-05	3.7835e-05	5.6771e-05	7.7632e-05	2.993e-05	6.4154e-05	4.7956e-05	5.6273e-05	5.2145e-05
K01182	0.00032827	0.00040922	0.00030713	0.00041358	0.00031432	0.00021771	0.00034907	0.00035734	0.00027093	0.00037216	0.00032474	0.00034047	0.0003824	0.00016617	0.00027658	0.00019205	0.00023799	0.00031493	0.00026774	0.00034097
K01183	0.00016708	0.00038744	0.00027749	0.00035878	0.00024025	0.00018827	0.00027969	0.00021075	0.00013994	0.00037618	0.00025921	0.00030592	0.00037027	0.00020875	0.00026094	0.00018512	0.00026548	0.0001196	0.00030417	0.00035864
K01184	6.4829e-06	4.8392e-06	4.1504e-06	6.2891e-06	5.0362e-06	4.0802e-06	4.2982e-06	3.8265e-06	3.9184e-06	4.3074e-06	5.2424e-06	5.0199e-06	4.3323e-06	5.3223e-06	2.9518e-06	4.157e-06	7.9823e-06	5.8483e-06	6.5159e-06	6.0836e-06
K01185	3.3299e-05	6.2305e-05	4.5062e-05	3.474e-05	5.8656e-05	4.1677e-05	2.0263e-05	2.7374e-05	8.5925e-05	4.2786e-05	6.4947e-05	3.3072e-05	3.4947e-05	2.0107e-05	5.6084e-05	6.3186e-05	4.612e-05	3.8891e-05	3.1395e-05	5.5042e-05
K01186	0.00067541	0.00051598	0.00056891	0.00058159	0.00036675	0.00053568	0.00034017	0.00086126	0.00087436	0.00044423	0.00039376	0.00040809	0.00035149	0.00039089	0.0004776	0.00057976	0.00021582	0.00057898	0.00020525	0.00040615
K01187	0.00098482	0.0011324	0.001147	0.0011644	0.00098146	0.00086472	0.0011755	0.00083006	0.0010087	0.00083879	0.0010333	0.00098627	0.001036	0.00088794	0.0012034	0.00084193	0.00085617	0.0010609	0.0010861	0.0010872
K01188	0.00044556	0.00082055	0.00044884	0.00087418	0.0004103	0.00049342	0.00077889	0.00054749	0.00032915	0.00080232	0.00035998	0.00072051	0.00087195	0.00024926	0.00047199	0.00059999	0.00042897	0.00042692	0.00066106	0.00086821
K01189	5.0096e-06	4.8392e-06	2.9646e-06	2.6953e-06	5.6286e-06	3.2059e-06	7.3683e-06	5.0039e-06	6.1575e-06	5.7431e-06	5.8249e-06	6.2011e-06	4.3323e-06	3.5482e-06	6.1987e-06	5.5427e-06	2.9564e-06	6.1407e-06	5.6273e-06	4.0557e-06
K01190	0.0014551	0.0014672	0.0013261	0.0012413	0.0010037	0.0010746	0.0013346	0.0013949	0.0013826	0.00070612	0.0010068	0.00072228	0.00050486	0.00099261	0.001106	0.00078567	0.0011081	0.0010612	0.0009682	0.00079782
K01191	0.00042699	0.00047182	0.00040615	0.00066844	0.00026603	0.0004666	0.00040464	0.00069996	0.000597	0.00065156	0.00028862	0.00052473	0.00065706	0.00023359	0.0004469	0.00073745	0.00019364	0.00036435	0.00039066	0.00073177
K01192	0.00021895	0.00017724	0.00022412	0.00020754	0.00014486	0.00010696	0.00015934	0.00023077	0.00020852	9.5049e-05	0.00014883	0.00011634	7.8848e-05	0.0001573	0.00017593	0.00015298	0.00012949	0.00018598	0.00012202	0.00015528
K01193	0.00055812	0.00048392	0.00048649	0.00039921	0.00045622	0.00056278	0.00067389	0.00043034	0.00046377	0.00048099	0.0003393	0.00045061	0.0005941	0.00042726	0.00064113	0.00043648	0.00033023	0.00047108	0.00045226	0.00034039
K01194	8.5457e-05	0.00014971	0.00011888	0.00013147	0.00020174	0.00013319	5.649e-05	0.00015394	0.00021607	9.5049e-05	0.00020154	0.00014558	0.00011726	0.00011295	0.00012043	0.00021672	0.00020931	0.00013948	0.00012173	0.00017237
K01195	0.00011375	0.00019448	0.00017195	0.00014914	0.00013094	0.00015272	5.1271e-05	0.0001822	0.0002365	0.00011486	0.00016251	0.00011841	0.00014354	0.00015878	0.00015408	0.00022863	6.6519e-05	0.00017633	8.2337e-05	0.00015267
K01196	2.3574e-06	4.8392e-06	3.854e-06	2.9948e-06	4.4437e-06	3.4973e-06	4.6052e-06	5.2983e-06	4.1983e-06	4.5945e-06	5.8249e-06	6.4964e-06	4.3323e-06	4.7309e-06	3.8373e-06	5.2655e-06	5.3215e-06	4.971e-06	7.4044e-06	5.7939e-06
K01197	9.9012e-05	0.00012007	0.00010613	8.4154e-05	6.7544e-05	7.2278e-05	0.00012004	6.9172e-05	6.7173e-05	3.3597e-05	6.4073e-05	2.7757e-05	7.5093e-06	9.2549e-05	6.3168e-05	1.0531e-05	0.00012062	7.8367e-05	8.2337e-05	3.1287e-05
K01198	0.00012465	0.00017603	9.2199e-05	0.00018059	0.00021004	0.00012095	0.00016763	0.00016483	0.00012343	0.00015736	0.00015116	0.00022708	0.00019784	8.3974e-05	0.00017504	0.00018429	0.00013481	0.00010615	0.00010603	0.00020568
K01199	5.8936e-06	6.9564e-06	4.4469e-06	5.9896e-06	5.6286e-06	5.5375e-06	6.1402e-06	3.8265e-06	5.0379e-06	7.1789e-06	5.2424e-06	6.2011e-06	5.7764e-06	6.2094e-06	6.1987e-06	6.9283e-06	3.5477e-06	6.1407e-06	6.2197e-06	4.3454e-06
K01200	0.00040931	0.0006657	0.00056594	0.00054116	0.00043637	0.0005689	0.00047341	0.00044682	0.00036833	0.00048817	0.00056297	0.00051085	0.0006614	0.00048226	0.00051922	0.00025275	0.0005088	0.00029534	0.00053371	0.0004777
K01201	0.00016649	0.00022412	0.00016305	0.00017729	0.00014723	0.00011133	0.00021429	0.00012951	0.00010776	8.6147e-05	0.00013222	0.00010247	8.0581e-05	0.00013483	0.00015143	5.127e-05	0.00016704	0.00012866	0.00013802	0.000104
K01202	3.8308e-06	5.1417e-06	3.5575e-06	5.3906e-06	5.9249e-06	5.8289e-06	6.7543e-06	8.2417e-06	5.5977e-06	4.3074e-06	5.5336e-06	5.9058e-06	7.2205e-06	5.3223e-06	6.1987e-06	5.2655e-06	5.3215e-06	2.9241e-06	4.7388e-06	4.3454e-06
K01203	5.8936e-06	5.7466e-06	8.0044e-06	3.5938e-06	5.3324e-06	5.8289e-06	5.2192e-06	6.1813e-06	6.4374e-06	5.7431e-06	6.4073e-06	5.9058e-06	5.1988e-06	5.3223e-06	7.3794e-06	3.3256e-06	5.9128e-06	4.971e-06	3.5541e-06	3.4763e-06
K01204	5.0096e-06	6.049e-06	5.6327e-06	5.0912e-06	5.9249e-06	4.9546e-06	4.9122e-06	7.3587e-06	3.9184e-06	2.5844e-06	4.0774e-06	6.4964e-06	8.0869e-06	6.8007e-06	4.1325e-06	4.157e-06	5.9128e-06	5.8483e-06	4.4426e-06	4.9248e-06
K01205	9.2824e-05	0.00012642	0.00011058	8.5651e-05	6.1619e-05	7.4027e-05	0.00011544	6.4168e-05	6.5773e-05	2.728e-05	6.9025e-05	2.8348e-05	8.3758e-06	9.0184e-05	6.1102e-05	9.9768e-06	0.00011707	8.6847e-05	8.7964e-05	3.6791e-05
K01206	0.00077854	0.00078789	0.00073226	0.00068162	0.00047162	0.0005418	0.00068187	0.00077296	0.00072378	0.00030209	0.00054521	0.00028673	0.0001291	0.00057008	0.0004959	0.00028323	0.00065041	0.00063834	0.00050024	0.00036936
K01207	0.00026462	0.00021504	0.00026444	0.00029469	0.00023285	0.00029232	0.00025206	0.00031466	0.00026309	0.00022484	0.00026387	0.00029086	0.00025792	0.00030751	0.00024736	0.00035584	0.0002037	0.00033774	0.00019014	0.00029404
K01208	5.8936e-06	6.9564e-06	5.3363e-06	5.3906e-06	5.0362e-06	5.8289e-06	6.4472e-06	3.5322e-06	4.4782e-06	4.3074e-06	4.6599e-06	7.3822e-06	8.0869e-06	3.2525e-06	7.0843e-06	3.3256e-06	2.3651e-06	4.6786e-06	6.5159e-06	2.8969e-06
K01209	0.000183	0.00023228	0.00012926	0.00024198	0.00021181	9.3845e-05	0.00025635	0.00016572	0.00010888	0.00016196	0.00013514	0.00020375	0.00018802	9.8463e-05	0.00022965	0.00013718	9.9039e-05	0.00012895	0.00011344	0.00020076
K01210	5.8936e-06	6.049e-06	4.7434e-06	3.2943e-06	3.8512e-06	7.2861e-06	5.5262e-06	3.8265e-06	4.4782e-06	4.8817e-06	4.3686e-06	5.0199e-06	8.6646e-06	4.4353e-06	4.7228e-06	6.0969e-06	3.5477e-06	6.7255e-06	7.4044e-06	6.9526e-06
K01212	8.8993e-05	0.00010344	9.9314e-05	7.0677e-05	5.4509e-05	7.3444e-05	0.00011145	7.1232e-05	5.4858e-05	2.3834e-05	6.3491e-05	2.3918e-05	8.3758e-06	8.22e-05	4.6638e-05	1.2194e-05	9.8152e-05	7.8367e-05	8.4706e-05	3.2735e-05
K01213	3.8308e-06	6.049e-06	6.8186e-06	5.6901e-06	7.1099e-06	4.9546e-06	5.2192e-06	5.887e-06	2.7989e-06	4.0202e-06	4.3686e-06	5.6105e-06	6.0652e-06	4.7309e-06	4.7228e-06	4.4341e-06	5.6172e-06	5.8483e-06	4.7388e-06	5.5042e-06
K01214	6.4829e-06	4.5368e-06	7.115e-06	5.0912e-06	6.8136e-06	3.4973e-06	4.2982e-06	6.4757e-06	5.0379e-06	4.8817e-06	8.1548e-06	5.9058e-06	5.1988e-06	4.7309e-06	5.6084e-06	2.7713e-06	3.5477e-06	7.3104e-06	4.1465e-06	4.6351e-06
K01215	0.00023722	0.00012703	0.00017728	0.00012458	0.00013242	0.00029232	0.000175	0.0001875	0.00015506	0.00016741	0.0001296	0.0001252	0.00021546	0.00018155	0.00018006	0.00014411	0.0001357	0.00016668	0.00018244	6.5181e-05
K01216	5.0096e-06	4.8392e-06	6.8186e-06	5.0912e-06	4.4437e-06	3.7888e-06	3.6841e-06	3.5322e-06	5.3178e-06	4.5945e-06	4.6599e-06	6.7917e-06	3.4658e-06	4.4353e-06	5.018e-06	7.2055e-06	3.8433e-06	4.0938e-06	3.8503e-06	5.5042e-06
K01217	4.7149e-06	4.5368e-06	6.5221e-06	6.5886e-06	6.2211e-06	6.9947e-06	4.9122e-06	2.3548e-06	3.3586e-06	5.456e-06	4.0774e-06	6.2011e-06	4.9099e-06	2.9568e-06	5.3132e-06	5.2655e-06	2.3651e-06	8.7724e-06	5.3312e-06	3.4763e-06
K01218	5.3042e-06	3.6294e-06	3.2611e-06	7.7865e-06	5.0362e-06	2.9145e-06	5.2192e-06	6.1813e-06	5.5977e-06	5.456e-06	5.2424e-06	5.9058e-06	5.1988e-06	5.3223e-06	6.1987e-06	4.9884e-06	3.252e-06	3.509e-06	4.4426e-06	3.1866e-06
K01219	5.0096e-06	7.2588e-06	5.3363e-06	3.5938e-06	3.8512e-06	4.3717e-06	4.6052e-06	7.0644e-06	1.3994e-06	3.1587e-06	4.6599e-06	4.7246e-06	4.6211e-06	5.9137e-06	5.9036e-06	4.157e-06	6.5041e-06	5.8483e-06	4.4426e-06	5.5042e-06
K01220	0.00040253	0.00021414	0.00033707	0.0001734	0.00021122	0.0004019	0.0003942	0.00025697	0.00033306	0.00026103	0.0001797	0.00022531	0.00028131	0.00028445	0.00033237	0.00021478	0.00023503	0.00027048	0.00031513	0.00012833
K01222	0.00035096	0.00054925	0.00033796	0.00057231	0.00045325	0.00027542	0.00039052	0.00039502	0.00044502	0.00051602	0.0004025	0.00051026	0.0005941	0.00020875	0.00049383	0.00046586	0.00022143	0.00034271	0.00036015	0.00057157
K01223	0.0010597	0.00093367	0.00095964	0.00085502	0.0010632	0.001118	0.0011289	0.0007082	0.0011028	0.0009614	0.00093635	0.00094079	0.0013	0.00078711	0.0012755	0.0010307	0.00074265	0.00098778	0.0011101	0.00081288
K01224	3.8308e-06	5.1417e-06	6.8186e-06	5.6901e-06	7.7024e-06	4.6631e-06	4.6052e-06	5.887e-06	2.7989e-06	4.3074e-06	4.6599e-06	4.7246e-06	4.6211e-06	5.3223e-06	5.3132e-06	4.7113e-06	5.0259e-06	5.2635e-06	3.5541e-06	4.3454e-06
K01225	3.5362e-06	4.5368e-06	6.5221e-06	3.2943e-06	5.3324e-06	5.8289e-06	6.7543e-06	5.5926e-06	4.4782e-06	4.8817e-06	4.9511e-06	5.3152e-06	5.4876e-06	6.5051e-06	5.3132e-06	4.9884e-06	6.7997e-06	5.2635e-06	4.4426e-06	5.2145e-06
K01226	0.00032238	0.0004933	0.00046841	0.00037435	0.0004026	0.00044824	0.00047802	0.00034969	0.00047721	0.00047008	0.00035473	0.00037206	0.00051872	0.00034625	0.00045369	0.00041958	0.00036571	0.00031756	0.00051001	0.0004554
K01227	0.00013054	5.5954e-05	8.0934e-05	7.1875e-05	7.969e-05	0.00013202	9.4253e-05	0.00017425	0.00016373	7.8681e-05	4.8929e-05	7.4413e-05	8.318e-05	5.7363e-05	0.00012545	0.00014106	2.779e-05	4.7371e-05	4.3242e-05	7.1265e-05
K01228	4.4202e-06	4.8392e-06	6.8186e-06	5.6901e-06	5.3324e-06	5.5375e-06	3.6841e-06	3.5322e-06	4.1983e-06	8.3276e-06	5.5336e-06	5.0199e-06	2.8882e-06	6.2094e-06	5.6084e-06	4.157e-06	4.139e-06	5.8483e-06	5.6273e-06	6.663e-06
K01229	5.5989e-06	5.1417e-06	5.6327e-06	5.3906e-06	7.4061e-06	3.4973e-06	6.7543e-06	3.8265e-06	4.7581e-06	6.3175e-06	6.4073e-06	4.4293e-06	4.3323e-06	7.9835e-06	8.265e-06	4.157e-06	5.9128e-06	3.509e-06	5.3312e-06	4.6351e-06
K01230	4.7149e-06	5.4441e-06	3.854e-06	4.4922e-06	3.5549e-06	3.2059e-06	6.1402e-06	5.887e-06	4.4782e-06	4.8817e-06	4.6599e-06	6.7917e-06	5.4876e-06	3.5482e-06	4.7228e-06	3.6027e-06	4.4346e-06	5.8483e-06	5.9235e-06	4.6351e-06
K01231	4.4202e-06	6.3515e-06	3.854e-06	4.7917e-06	5.0362e-06	4.3717e-06	6.4472e-06	3.8265e-06	5.0379e-06	7.1789e-06	4.9511e-06	5.6105e-06	4.0435e-06	5.3223e-06	4.1325e-06	8.5911e-06	3.252e-06	4.6786e-06	5.9235e-06	3.4763e-06
K01232	0.0001276	0.00014911	4.9212e-05	0.00018837	0.00018041	4.5757e-05	0.00021337	0.0001039	3.3306e-05	0.00015018	7.3102e-05	0.00021556	0.00019091	2.9864e-05	0.00019098	0.00012222	2.3947e-05	5.6436e-05	5.0054e-05	0.00018048
K01233	6.1883e-06	6.6539e-06	4.7434e-06	4.7917e-06	3.8512e-06	4.9546e-06	6.4472e-06	5.5926e-06	2.7989e-06	6.0303e-06	3.4949e-06	8.5634e-06	3.177e-06	4.1396e-06	4.7228e-06	5.5427e-06	5.9128e-06	4.6786e-06	6.812e-06	5.2145e-06
K01234	8.1332e-05	2.0567e-05	7.9451e-05	2.9349e-05	5.1547e-05	8.0439e-05	9.3332e-05	3.2378e-05	1.4554e-05	1.3209e-05	5.4754e-05	3.9569e-05	4.4478e-05	6.5346e-05	6.1987e-05	1.7182e-05	7.3319e-05	8.3923e-05	0.00010248	1.7961e-05
K01235	8.3689e-05	0.00010707	0.00010821	7.3672e-05	5.7471e-05	6.4701e-05	0.00010377	7.0938e-05	5.7377e-05	2.9003e-05	5.5919e-05	2.7167e-05	8.3758e-06	9.0479e-05	5.4608e-05	1.0254e-05	9.8448e-05	8.0706e-05	7.9079e-05	3.4474e-05
K01236	3.8898e-05	6.9564e-06	1.7491e-05	2.3958e-05	6.9618e-05	9.7051e-05	3.5613e-05	9.7429e-05	5.5977e-06	4.7094e-05	2.6212e-05	6.8212e-05	2.7149e-05	6.6233e-05	7.6746e-06	6.8452e-05	0.00011678	5.205e-05	4.2649e-05	2.5493e-05
K01237	3.2415e-06	4.2343e-06	5.0398e-06	4.1927e-06	3.8512e-06	5.246e-06	3.6841e-06	4.7096e-06	4.7581e-06	5.456e-06	3.7862e-06	4.1341e-06	3.7547e-06	2.3655e-06	2.6566e-06	5.8198e-06	5.0259e-06	3.8014e-06	5.3312e-06	5.5042e-06
K01238	0.00044762	0.00013852	0.00028579	0.00028331	0.0003392	0.000385	0.00030333	0.00038972	0.00038792	0.00031157	0.00027697	0.00035464	0.00033128	0.00033324	0.00039465	0.00036609	0.00021375	0.00028043	0.00030595	0.00026246
K01239	0.00029822	0.00036778	0.00041534	0.00033152	0.00027551	0.00031214	0.00031806	0.00031171	0.00024714	0.00029261	0.00033493	0.00030681	0.000359	0.00043111	0.00033503	0.000217	0.00038463	0.00036084	0.00038562	0.00027347
K01240	6.1883e-06	6.049e-06	8.0044e-06	4.4922e-06	5.6286e-06	6.7032e-06	5.8332e-06	5.0039e-06	5.5977e-06	4.5945e-06	3.2037e-06	4.7246e-06	5.7764e-06	4.4353e-06	4.7228e-06	4.7113e-06	5.0259e-06	4.6786e-06	5.9235e-06	6.3733e-06
K01241	0.00016178	0.00011523	9.9314e-05	0.00016322	0.00021952	0.00013785	8.7498e-05	0.00017455	0.0001405	0.00010941	0.00019601	0.00012491	9.1845e-05	0.00017859	0.00011719	0.00019649	0.00019778	0.00018042	0.0001552	0.0001518
K01242	5.8936e-06	3.9319e-06	4.1504e-06	6.888e-06	4.4437e-06	4.6631e-06	6.7543e-06	5.2983e-06	3.6385e-06	4.3074e-06	3.7862e-06	6.4964e-06	3.7547e-06	3.2525e-06	3.8373e-06	4.157e-06	6.2084e-06	6.1407e-06	3.2579e-06	5.5042e-06
K01243	0.0004544	0.00054078	0.00055201	0.00044952	0.00038601	0.00043513	0.00045376	0.00041474	0.0004954	0.00051803	0.00047968	0.00042906	0.00049735	0.00050178	0.00052512	0.00035889	0.00048544	0.0004047	0.00054496	0.00045163
K01244	6.1883e-06	5.1417e-06	6.5221e-06	4.7917e-06	3.8512e-06	4.3717e-06	6.7543e-06	3.5322e-06	3.6385e-06	4.3074e-06	4.0774e-06	6.7917e-06	6.0652e-06	6.5051e-06	4.1325e-06	4.7113e-06	6.5041e-06	7.0179e-06	5.035e-06	6.3733e-06
K01245	7.367e-06	5.7466e-06	5.9292e-06	3.8932e-06	7.7024e-06	4.9546e-06	5.2192e-06	6.4757e-06	5.5977e-06	4.3074e-06	7.5723e-06	5.3152e-06	4.9099e-06	5.9137e-06	6.4939e-06	4.157e-06	4.139e-06	6.1407e-06	5.6273e-06	5.5042e-06
K01246	0.0002882	0.00025224	0.0002846	0.00026744	0.00027314	0.0002999	0.00030793	0.0002811	0.00032187	0.0002794	0.00024115	0.00023564	0.00028853	0.00027469	0.00030108	0.00028295	0.00024302	0.00032516	0.00030328	0.00023089
K01247	7.3965e-05	0.00016302	0.00013519	0.00014884	0.00016767	0.00013144	6.6622e-05	0.00013128	0.00010356	0.00012721	0.00019717	0.00016684	0.00016578	0.00016558	0.00011069	0.00011612	0.00019926	9.2988e-05	0.00016112	0.00017526
K01249	4.4202e-06	3.9319e-06	3.2611e-06	6.5886e-06	4.4437e-06	3.7888e-06	7.0613e-06	8.5361e-06	3.9184e-06	4.5945e-06	4.9511e-06	6.4964e-06	4.6211e-06	4.7309e-06	4.7228e-06	5.8198e-06	6.2084e-06	3.8014e-06	4.4426e-06	5.5042e-06
K01250	1.6502e-05	4.3553e-05	2.6681e-05	2.5456e-05	3.6734e-05	1.9818e-05	7.3683e-06	2.0899e-05	6.5773e-05	2.5844e-05	5.4754e-05	3.071e-05	2.4261e-05	2.9568e-05	3.365e-05	5.3487e-05	3.252e-05	3.3628e-05	3.2875e-05	4.6061e-05
K01251	0.00020392	7.894e-05	0.0001002	0.00016471	0.0002133	0.00017516	0.00012618	0.00026786	0.00011811	0.00014157	0.00017766	0.00016625	7.4515e-05	0.00017268	9.6818e-05	0.00017432	0.00014989	0.00021726	0.00012943	0.00012486
K01252	7.2786e-05	4.2041e-05	6.0774e-05	4.4922e-05	9.5983e-05	7.5193e-05	0.00010131	8.2123e-05	8.9004e-05	4.3361e-05	7.3102e-05	0.00010069	4.4189e-05	7.126e-05	8.5011e-05	9.284e-05	5.4693e-05	9.4157e-05	8.7668e-05	6.1705e-05
K01253	3.5362e-06	4.8392e-06	5.6327e-06	6.888e-06	4.4437e-06	4.9546e-06	6.1402e-06	3.8265e-06	3.6385e-06	6.8918e-06	6.1161e-06	6.4964e-06	4.3323e-06	8.8705e-06	5.9036e-06	3.6027e-06	3.5477e-06	3.2166e-06	3.8503e-06	3.4763e-06
K01254	7.0723e-06	4.8392e-06	5.6327e-06	6.2891e-06	7.1099e-06	5.8289e-06	5.8332e-06	4.4152e-06	6.9971e-06	5.1688e-06	6.6986e-06	6.2011e-06	7.2205e-06	5.0266e-06	5.018e-06	3.3256e-06	4.139e-06	4.6786e-06	6.812e-06	5.7939e-06
K01255	0.00047384	0.0004564	0.00041149	0.00053787	0.00051576	0.00038034	0.00038806	0.0004583	0.00042487	0.00046146	0.00054492	0.00053861	0.00044132	0.00043702	0.00051302	0.00051519	0.00041567	0.00047371	0.00038917	0.00053854
K01256	0.0012745	0.00071681	0.00097328	0.00095534	0.00088933	0.00099091	0.00086332	0.0012539	0.0011912	0.0008787	0.00095207	0.00087671	0.00077664	0.0009181	0.00082	0.0010259	0.00078197	0.00121	0.00079553	0.00080506
K01257	7.9563e-06	4.8392e-06	3.5575e-06	5.3906e-06	6.5174e-06	4.6631e-06	6.7543e-06	4.7096e-06	4.4782e-06	4.3074e-06	4.0774e-06	6.4964e-06	6.0652e-06	4.7309e-06	5.9036e-06	4.9884e-06	6.2084e-06	5.8483e-06	6.2197e-06	5.5042e-06
K01258	0.00041373	0.00056135	0.0005363	0.00039651	0.00040497	0.00050012	0.00049122	0.00036234	0.00055725	0.00046146	0.00038357	0.00034637	0.00050774	0.0004382	0.00052866	0.00038965	0.0004343	0.00045704	0.00055207	0.00034387
K01259	0.00030735	0.00024559	0.00037621	0.00029169	0.00029832	0.00023869	0.00021337	0.00030583	0.00022223	0.00028084	0.00034512	0.00026045	0.00031655	0.00037936	0.00029193	0.00025441	0.00034886	0.00028072	0.00036548	0.00032243
K01260	6.4829e-06	4.5368e-06	5.9292e-06	6.2891e-06	4.4437e-06	4.6631e-06	9.2104e-06	5.5926e-06	6.1575e-06	4.5945e-06	5.5336e-06	4.7246e-06	5.7764e-06	4.4353e-06	5.6084e-06	4.157e-06	2.9564e-06	5.5559e-06	4.4426e-06	4.9248e-06
K01261	0.00014498	0.00013429	0.00016038	8.5352e-05	0.00012087	0.00022062	0.00014921	0.00013893	0.00023734	0.00015851	0.00010339	9.656e-05	0.00019495	0.0001576	0.00019305	0.00016628	0.00010288	0.00012135	0.00016941	7.3003e-05
K01262	0.00092853	0.00070622	0.0007708	0.00080141	0.00081467	0.00073386	0.00096617	0.00081476	0.00077584	0.00078624	0.00075315	0.00082947	0.00072869	0.00075193	0.0008817	0.00079315	0.00071161	0.00079624	0.00078516	0.00080332
K01263	0.00018535	2.4499e-05	0.00012273	5.6602e-05	0.00015612	0.00018186	0.00023026	0.00012304	8.5085e-05	5.255e-05	0.00010077	0.00016861	6.0074e-05	0.0001712	0.0001529	0.00011279	0.00011323	0.00018334	0.00016201	5.5042e-05
K01264	5.5989e-06	6.3515e-06	5.3363e-06	5.3906e-06	4.7399e-06	2.9145e-06	7.6753e-06	6.1813e-06	5.8776e-06	3.733e-06	5.8249e-06	4.1341e-06	4.3323e-06	4.4353e-06	5.018e-06	4.7113e-06	5.9128e-06	4.6786e-06	3.8503e-06	4.0557e-06
K01265	0.00073139	0.00067961	0.00073403	0.00068371	0.000655	0.00065284	0.00069999	0.00072469	0.00066865	0.00068142	0.00065471	0.00069541	0.00064205	0.00062655	0.00066563	0.00063159	0.00062617	0.00068133	0.00063145	0.00064631
K01266	9.8128e-05	1.845e-05	2.6978e-05	9.6732e-05	0.00011524	7.9856e-05	2.7324e-05	0.00010714	8.9563e-06	6.1164e-05	9.7566e-05	7.0279e-05	5.863e-05	0.00010053	5.1951e-05	0.0001042	8.4553e-05	9.8251e-05	8.0856e-05	6.8657e-05
K01267	6.1883e-06	4.5368e-06	3.2611e-06	6.5886e-06	5.6286e-06	4.9546e-06	5.8332e-06	5.887e-06	2.7989e-06	4.3074e-06	3.2037e-06	5.9058e-06	5.4876e-06	4.1396e-06	5.018e-06	3.6027e-06	5.0259e-06	6.4331e-06	5.3312e-06	5.2145e-06
K01268	3.5362e-06	4.5368e-06	3.2611e-06	6.5886e-06	4.7399e-06	4.0802e-06	7.0613e-06	5.0039e-06	4.7581e-06	5.7431e-06	4.6599e-06	6.7917e-06	6.6429e-06	5.3223e-06	5.3132e-06	4.7113e-06	4.4346e-06	5.8483e-06	6.2197e-06	7.2423e-06
K01269	0.00042994	0.00079756	0.00061219	0.0007463	0.00051458	0.00051557	0.00066437	0.00060194	0.0004856	0.00063577	0.00058598	0.00076657	0.00072811	0.00049291	0.00061751	0.00043177	0.00049608	0.00042225	0.00050528	0.00069005
K01270	0.00030647	0.00036324	0.00035071	0.00030277	0.00034453	0.00027716	0.00037455	0.00023607	0.0002533	0.00020675	0.00031949	0.00027964	0.00022008	0.00032998	0.00032912	0.00018374	0.00035388	0.00031581	0.00036992	0.00025232
K01271	0.00034684	0.00049481	0.00046722	0.00043964	0.00039341	0.00046777	0.0003417	0.00039884	0.00038568	0.00044911	0.0004689	0.0004199	0.00050803	0.00048019	0.00041915	0.00033561	0.00049874	0.00035177	0.00050113	0.000385
K01273	7.6027e-05	9.8902e-05	6.1664e-05	0.00013177	0.00012739	4.3425e-05	6.0174e-05	6.9466e-05	2.519e-05	0.00010481	0.0001063	9.3016e-05	0.00011928	8.841e-05	0.00010922	9.09e-05	6.5336e-05	6.2284e-05	9.5665e-05	0.00011559
K01274	7.3375e-05	8.7106e-05	7.7969e-05	5.0313e-05	4.6214e-05	0.00015126	5.5876e-05	0.00011803	9.3482e-05	6.6333e-05	3.7862e-05	4.1045e-05	8.5491e-05	9.6097e-05	6.1987e-05	0.00011141	2.7199e-05	6.3454e-05	3.2283e-05	3.3315e-05
K01275	5.0096e-06	6.6539e-06	5.6327e-06	5.3906e-06	3.8512e-06	6.1204e-06	8.5963e-06	4.7096e-06	5.0379e-06	4.5945e-06	5.8249e-06	5.3152e-06	4.6211e-06	7.0964e-06	3.8373e-06	6.9283e-06	4.7302e-06	4.0938e-06	5.035e-06	5.7939e-06
K01276	7.9563e-06	6.3515e-06	8.0044e-06	5.3906e-06	5.3324e-06	6.4118e-06	8.2893e-06	5.887e-06	6.7173e-06	5.456e-06	3.7862e-06	4.4293e-06	6.0652e-06	6.2094e-06	5.3132e-06	4.4341e-06	4.4346e-06	4.0938e-06	5.9235e-06	6.3733e-06
K01277	8.7814e-05	0.00011796	9.5757e-05	8.1459e-05	5.7768e-05	7.1696e-05	0.00010715	6.8289e-05	5.7097e-05	2.8429e-05	5.5045e-05	2.2737e-05	8.3758e-06	8.7818e-05	5.2837e-05	1.4965e-05	0.00010554	8.9771e-05	8.2337e-05	2.81e-05
K01278	0.00028378	0.00034994	0.00030091	0.00023539	0.00018071	0.0002145	0.00032666	0.0002137	0.00016961	7.3799e-05	0.00020707	7.7956e-05	1.4441e-05	0.00025104	0.00016884	2.5773e-05	0.00033378	0.00025674	0.00027396	0.000104
K01279	4.7149e-06	7.5613e-06	5.6327e-06	6.888e-06	5.6286e-06	6.7032e-06	4.2982e-06	4.7096e-06	5.5977e-06	5.1688e-06	6.4073e-06	7.0869e-06	5.1988e-06	5.3223e-06	5.018e-06	6.0969e-06	3.252e-06	4.3862e-06	5.3312e-06	6.663e-06
K01280	7.9563e-06	6.6539e-06	5.9292e-06	4.4922e-06	5.3324e-06	3.4973e-06	4.9122e-06	5.2983e-06	3.3586e-06	4.5945e-06	3.2037e-06	3.8388e-06	5.1988e-06	5.3223e-06	4.7228e-06	6.0969e-06	6.2084e-06	6.1407e-06	6.812e-06	4.0557e-06
K01281	0.00033269	0.00026404	0.00034123	0.00021742	0.00021892	0.00046311	0.00025267	0.00027492	0.0002379	0.00029893	0.00027493	0.00022235	0.00037056	0.00033945	0.00029754	0.00019843	0.00027701	0.00023422	0.00033942	0.00014687
K01282	5.3042e-06	3.6294e-06	6.2257e-06	4.7917e-06	2.9624e-06	6.1204e-06	5.5262e-06	5.5926e-06	4.1983e-06	3.733e-06	3.7862e-06	6.4964e-06	5.1988e-06	5.0266e-06	6.7891e-06	5.5427e-06	3.8433e-06	7.0179e-06	3.5541e-06	5.2145e-06
K01283	4.1255e-06	3.327e-06	5.3363e-06	8.3854e-06	4.7399e-06	5.246e-06	7.3683e-06	4.1209e-06	3.9184e-06	5.7431e-06	5.5336e-06	5.6105e-06	5.4876e-06	4.4353e-06	4.1325e-06	4.157e-06	4.4346e-06	6.7255e-06	4.4426e-06	6.663e-06
K01284	0.00036717	0.00042706	0.00036642	0.00038843	0.00034898	0.00023432	0.00031162	0.00027963	0.00032971	0.00015478	0.00038531	0.00014381	0.00011437	0.00035423	0.00027894	0.00020951	0.00039409	0.00035236	0.0003486	0.00025348
K01285	6.4829e-06	3.9319e-06	2.3717e-06	2.9948e-06	5.0362e-06	6.9947e-06	7.3683e-06	5.0039e-06	7.8368e-06	6.3175e-06	6.1161e-06	6.7917e-06	5.4876e-06	6.8007e-06	7.9698e-06	4.7113e-06	3.5477e-06	4.3862e-06	4.7388e-06	4.9248e-06
K01286	0.00023663	0.0006663	0.0005022	0.00050971	0.00053235	0.00031214	0.00021614	0.00038148	0.0002074	0.00055364	0.00057812	0.00044441	0.00066573	0.00057008	0.00045605	0.0002242	0.00052949	0.00017252	0.00061071	0.00053391
K01288	5.5989e-06	4.5368e-06	8.0044e-06	6.5886e-06	6.2211e-06	4.3717e-06	7.6753e-06	6.4757e-06	6.1575e-06	6.6046e-06	4.6599e-06	7.0869e-06	5.7764e-06	4.1396e-06	3.5421e-06	4.4341e-06	7.9823e-06	3.509e-06	5.3312e-06	3.4763e-06
K01289	4.1255e-06	4.8392e-06	4.4469e-06	4.1927e-06	5.0362e-06	4.6631e-06	3.3771e-06	5.5926e-06	3.9184e-06	6.3175e-06	6.9898e-06	7.9728e-06	5.4876e-06	4.4353e-06	4.7228e-06	5.2655e-06	5.9128e-06	6.7255e-06	4.4426e-06	4.6351e-06
K01290	6.1883e-06	4.5368e-06	5.9292e-06	5.0912e-06	8.2949e-06	5.246e-06	5.8332e-06	5.0039e-06	4.1983e-06	4.8817e-06	4.9511e-06	4.7246e-06	5.4876e-06	6.2094e-06	6.4939e-06	5.5427e-06	2.6608e-06	3.8014e-06	5.6273e-06	5.2145e-06
K01291	5.3042e-06	6.6539e-06	4.7434e-06	4.7917e-06	1.7775e-06	4.9546e-06	3.0701e-06	5.5926e-06	4.1983e-06	6.0303e-06	3.7862e-06	5.9058e-06	5.1988e-06	7.0964e-06	4.7228e-06	3.6027e-06	4.4346e-06	6.1407e-06	4.7388e-06	5.5042e-06
K01292	5.3042e-06	3.6294e-06	2.6681e-06	3.2943e-06	5.0362e-06	3.4973e-06	4.6052e-06	8.2417e-06	4.1983e-06	5.456e-06	6.1161e-06	5.0199e-06	6.354e-06	7.0964e-06	6.4939e-06	5.2655e-06	4.4346e-06	4.3862e-06	3.5541e-06	5.5042e-06
K01293	2.9468e-06	4.8392e-06	3.2611e-06	4.4922e-06	5.3324e-06	7.5776e-06	7.3683e-06	5.5926e-06	2.519e-06	5.456e-06	5.5336e-06	5.0199e-06	3.4658e-06	5.618e-06	5.018e-06	3.8799e-06	3.8433e-06	6.4331e-06	4.4426e-06	3.4763e-06
K01294	5.3042e-06	4.5368e-06	5.6327e-06	4.4922e-06	3.2587e-06	4.6631e-06	5.5262e-06	4.7096e-06	4.1983e-06	4.3074e-06	4.3686e-06	4.7246e-06	2.5994e-06	2.6612e-06	5.6084e-06	5.2655e-06	6.2084e-06	6.7255e-06	4.4426e-06	4.3454e-06
K01295	4.4791e-05	4.9905e-05	4.5358e-05	8.9844e-05	6.4878e-05	0.00011104	9.2718e-05	8.5655e-05	1.5114e-05	5.3986e-05	8.4752e-05	0.00011841	5.863e-05	6.8599e-05	4.2506e-05	5.4595e-05	0.00010939	6.1699e-05	5.9827e-05	8.8646e-05
K01296	5.8936e-06	4.5368e-06	4.7434e-06	4.7917e-06	6.8136e-06	4.3717e-06	6.1402e-06	6.4757e-06	5.8776e-06	4.8817e-06	3.7862e-06	7.0869e-06	4.9099e-06	3.8439e-06	5.018e-06	6.0969e-06	4.4346e-06	4.971e-06	5.035e-06	7.8217e-06
K01297	0.00011846	0.00013368	0.00014704	0.00012698	0.0001419	0.0001023	0.00013693	0.00011774	0.00012315	0.00017344	0.00014184	0.00015621	0.00015856	0.00014429	0.00011482	0.0001527	0.00018182	0.00010995	0.00014157	0.00020365
K01298	5.5989e-06	3.9319e-06	5.6327e-06	3.8932e-06	4.1474e-06	5.5375e-06	4.9122e-06	5.2983e-06	4.7581e-06	4.8817e-06	4.6599e-06	5.6105e-06	5.1988e-06	3.5482e-06	6.7891e-06	4.4341e-06	5.0259e-06	4.971e-06	6.2197e-06	4.0557e-06
K01299	0.00012995	0.00024347	0.00020634	0.00027133	0.00020471	0.00019673	0.00019434	0.00013834	0.00015814	0.00023805	0.000286	0.00021054	0.0002738	0.00021201	0.00022817	0.00020369	0.00018891	0.00018042	0.0003095	0.00029114
K01300	6.4829e-06	7.8637e-06	5.3363e-06	4.4922e-06	5.3324e-06	6.1204e-06	7.0613e-06	5.0039e-06	4.7581e-06	4.3074e-06	3.4949e-06	7.0869e-06	7.7981e-06	5.618e-06	5.018e-06	5.8198e-06	4.4346e-06	6.7255e-06	4.4426e-06	4.3454e-06
K01301	6.1883e-06	7.2588e-06	3.5575e-06	5.9896e-06	5.0362e-06	4.6631e-06	5.5262e-06	6.4757e-06	5.5977e-06	6.8918e-06	6.9898e-06	7.9728e-06	3.4658e-06	7.6878e-06	5.6084e-06	7.7597e-06	4.4346e-06	4.971e-06	3.8503e-06	4.9248e-06
K01303	6.7776e-06	5.7466e-06	5.6327e-06	6.2891e-06	5.6286e-06	5.246e-06	5.5262e-06	3.5322e-06	4.7581e-06	4.3074e-06	5.2424e-06	5.0199e-06	5.7764e-06	5.0266e-06	4.1325e-06	4.4341e-06	6.2084e-06	6.1407e-06	4.1465e-06	5.5042e-06
K01304	0.00015471	0.00016816	0.00019122	0.00012309	0.00012857	0.00019673	0.00020785	0.00014747	0.00020516	0.00014128	0.00013601	0.00013347	0.00016867	0.00015376	0.00022434	0.00012	0.0001626	0.00013393	0.00017948	0.00011646
K01305	5.5105e-05	0.00010011	4.9805e-05	0.00010422	0.00010102	3.3225e-05	7.9516e-05	5.21e-05	9.2362e-05	7.9543e-05	8.8247e-05	0.00010099	9.9354e-05	3.1934e-05	9.6228e-05	9.8937e-05	4.5529e-05	5.4681e-05	5.3608e-05	0.00011037
K01306	5.5989e-06	5.1417e-06	2.9646e-06	5.0912e-06	5.9249e-06	4.9546e-06	5.2192e-06	3.8265e-06	6.4374e-06	5.456e-06	6.1161e-06	6.7917e-06	4.3323e-06	6.2094e-06	3.8373e-06	5.5427e-06	5.6172e-06	6.7255e-06	4.4426e-06	4.9248e-06
K01307	5.5989e-06	3.0245e-06	3.5575e-06	4.7917e-06	4.7399e-06	4.6631e-06	7.9823e-06	3.2378e-06	6.7173e-06	4.8817e-06	5.8249e-06	4.1341e-06	6.0652e-06	6.5051e-06	5.3132e-06	3.6027e-06	4.7302e-06	2.9241e-06	3.5541e-06	5.2145e-06
K01308	6.1883e-06	5.7466e-06	5.6327e-06	7.1875e-06	4.1474e-06	4.3717e-06	5.8332e-06	4.7096e-06	5.0379e-06	3.1587e-06	5.5336e-06	5.0199e-06	4.6211e-06	4.1396e-06	4.1325e-06	4.9884e-06	6.5041e-06	3.509e-06	6.5159e-06	3.1866e-06
K01310	5.3042e-06	6.9564e-06	3.2611e-06	6.5886e-06	5.0362e-06	3.2059e-06	6.7543e-06	4.7096e-06	3.0787e-06	5.7431e-06	4.3686e-06	6.2011e-06	7.5093e-06	5.0266e-06	4.1325e-06	4.9884e-06	6.5041e-06	6.7255e-06	4.1465e-06	4.6351e-06
K01311	7.6617e-06	3.9319e-06	5.0398e-06	5.3906e-06	5.3324e-06	6.1204e-06	7.3683e-06	6.4757e-06	3.9184e-06	7.4661e-06	5.8249e-06	3.8388e-06	6.354e-06	5.618e-06	4.1325e-06	5.8198e-06	3.8433e-06	5.8483e-06	5.035e-06	5.5042e-06
K01312	4.7149e-06	2.1172e-06	4.1504e-06	5.0912e-06	7.4061e-06	4.3717e-06	5.2192e-06	5.0039e-06	4.4782e-06	3.733e-06	5.8249e-06	4.4293e-06	7.5093e-06	6.2094e-06	5.6084e-06	3.3256e-06	7.6866e-06	4.971e-06	7.9967e-06	6.663e-06
K01313	5.0096e-06	7.2588e-06	4.1504e-06	7.1875e-06	4.4437e-06	4.9546e-06	4.2982e-06	5.0039e-06	3.3586e-06	3.733e-06	4.9511e-06	7.9728e-06	6.0652e-06	5.618e-06	5.9036e-06	4.7113e-06	4.7302e-06	5.8483e-06	4.7388e-06	6.9526e-06
K01314	5.5989e-06	4.2343e-06	5.6327e-06	4.4922e-06	4.7399e-06	4.6631e-06	4.6052e-06	5.5926e-06	5.5977e-06	3.4459e-06	4.3686e-06	7.3822e-06	3.7547e-06	2.3655e-06	8.265e-06	2.4942e-06	4.7302e-06	6.7255e-06	3.5541e-06	5.7939e-06
K01315	5.8936e-06	5.1417e-06	5.3363e-06	5.0912e-06	7.1099e-06	5.246e-06	4.9122e-06	5.0039e-06	5.5977e-06	6.6046e-06	4.9511e-06	5.6105e-06	3.177e-06	6.2094e-06	5.018e-06	5.5427e-06	5.3215e-06	3.509e-06	4.1465e-06	5.5042e-06
K01316	5.5989e-06	5.1417e-06	3.2611e-06	4.4922e-06	5.0362e-06	3.2059e-06	5.5262e-06	6.77e-06	6.1575e-06	5.456e-06	4.0774e-06	5.0199e-06	4.6211e-06	4.7309e-06	7.0843e-06	3.6027e-06	3.252e-06	4.6786e-06	5.035e-06	4.9248e-06
K01317	4.7149e-06	4.5368e-06	5.0398e-06	3.2943e-06	6.5174e-06	5.246e-06	7.0613e-06	4.1209e-06	4.1983e-06	3.4459e-06	6.1161e-06	5.6105e-06	4.6211e-06	5.618e-06	5.9036e-06	4.157e-06	4.7302e-06	3.8014e-06	5.3312e-06	5.7939e-06
K01318	6.925e-05	8.4082e-05	9.7535e-05	4.3724e-05	3.4364e-05	4.2551e-05	9.2104e-05	4.0914e-05	9.6841e-05	7.6384e-05	3.2328e-05	4.3998e-05	6.0941e-05	8.3383e-05	9.0324e-05	3.4919e-05	5.6467e-05	5.5559e-05	6.8713e-05	3.5632e-05
K01319	5.0096e-06	6.3515e-06	4.1504e-06	5.9896e-06	4.4437e-06	4.0802e-06	4.2982e-06	7.6531e-06	4.4782e-06	4.5945e-06	3.4949e-06	5.6105e-06	6.0652e-06	4.7309e-06	4.7228e-06	4.157e-06	3.8433e-06	4.6786e-06	4.4426e-06	5.5042e-06
K01320	4.4202e-06	5.1417e-06	3.2611e-06	6.888e-06	5.9249e-06	4.0802e-06	5.5262e-06	4.1209e-06	5.5977e-06	4.3074e-06	6.4073e-06	5.0199e-06	4.9099e-06	3.8439e-06	4.1325e-06	4.4341e-06	1.7738e-06	6.1407e-06	3.5541e-06	4.0557e-06
K01321	8.251e-06	4.5368e-06	5.9292e-06	3.2943e-06	4.7399e-06	3.7888e-06	5.5262e-06	6.77e-06	5.5977e-06	7.4661e-06	3.7862e-06	5.6105e-06	4.3323e-06	5.618e-06	5.3132e-06	4.9884e-06	3.252e-06	4.3862e-06	6.5159e-06	3.4763e-06
K01322	0.00011109	0.00010223	0.00014319	0.00013626	3.8512e-05	8.7725e-05	0.00024561	2.0016e-05	6.4654e-05	9.9356e-05	0.00014999	0.00014853	0.00015423	9.9054e-05	0.00010066	7.344e-05	0.00010259	0.00011872	9.7738e-05	0.00022828
K01323	3.2415e-06	6.3515e-06	4.4469e-06	7.1875e-06	6.2211e-06	3.7888e-06	5.2192e-06	5.887e-06	5.0379e-06	4.5945e-06	6.9898e-06	5.9058e-06	5.1988e-06	6.5051e-06	7.0843e-06	3.3256e-06	4.139e-06	6.7255e-06	4.4426e-06	4.9248e-06
K01324	5.8936e-06	3.327e-06	5.3363e-06	2.9948e-06	5.9249e-06	5.5375e-06	6.1402e-06	5.0039e-06	6.4374e-06	6.0303e-06	6.1161e-06	5.6105e-06	3.177e-06	7.0964e-06	3.247e-06	4.7113e-06	6.5041e-06	4.0938e-06	5.035e-06	4.9248e-06
K01325	7.0723e-06	6.049e-06	3.854e-06	6.5886e-06	5.9249e-06	3.4973e-06	4.9122e-06	3.8265e-06	3.6385e-06	3.733e-06	4.0774e-06	6.7917e-06	4.9099e-06	4.4353e-06	5.018e-06	2.7713e-06	5.3215e-06	5.5559e-06	4.7388e-06	6.0836e-06
K01326	4.1255e-06	8.4686e-06	5.0398e-06	4.4922e-06	4.4437e-06	6.9947e-06	7.3683e-06	2.9435e-06	2.2391e-06	4.3074e-06	4.3686e-06	6.7917e-06	4.0435e-06	2.6612e-06	5.6084e-06	6.9283e-06	4.7302e-06	4.3862e-06	5.9235e-06	8.6908e-06
K01327	3.5362e-06	4.5368e-06	7.115e-06	5.9896e-06	5.0362e-06	5.5375e-06	6.1402e-06	6.4757e-06	4.7581e-06	4.3074e-06	5.2424e-06	5.6105e-06	5.7764e-06	9.4619e-06	6.1987e-06	5.2655e-06	6.7997e-06	3.2166e-06	4.1465e-06	5.7939e-06
K01328	4.7149e-06	3.9319e-06	6.8186e-06	3.2943e-06	5.9249e-06	4.3717e-06	4.9122e-06	5.887e-06	5.0379e-06	3.733e-06	5.5336e-06	5.0199e-06	6.354e-06	5.618e-06	4.7228e-06	4.4341e-06	7.0954e-06	4.6786e-06	3.8503e-06	4.9248e-06
K01329	5.3042e-06	4.5368e-06	4.1504e-06	5.6901e-06	5.6286e-06	4.3717e-06	8.5963e-06	4.4152e-06	3.9184e-06	5.456e-06	3.2037e-06	5.6105e-06	5.1988e-06	5.0266e-06	4.1325e-06	6.0969e-06	4.7302e-06	4.3862e-06	4.7388e-06	5.7939e-06
K01330	4.7149e-06	6.3515e-06	3.854e-06	2.3958e-06	5.0362e-06	3.2059e-06	4.9122e-06	3.8265e-06	3.6385e-06	3.4459e-06	4.9511e-06	6.2011e-06	5.4876e-06	5.0266e-06	8.8553e-06	5.5427e-06	6.2084e-06	4.6786e-06	5.035e-06	6.9526e-06
K01331	5.5989e-06	4.5368e-06	4.1504e-06	5.6901e-06	6.5174e-06	6.1204e-06	5.8332e-06	4.4152e-06	3.9184e-06	4.8817e-06	4.9511e-06	5.6105e-06	4.9099e-06	3.8439e-06	3.8373e-06	5.2655e-06	6.2084e-06	6.7255e-06	5.6273e-06	4.3454e-06
K01332	4.4202e-06	5.1417e-06	5.9292e-06	2.6953e-06	6.2211e-06	5.5375e-06	6.4472e-06	4.7096e-06	5.0379e-06	3.4459e-06	5.5336e-06	6.7917e-06	4.0435e-06	7.9835e-06	6.4939e-06	6.0969e-06	6.2084e-06	4.971e-06	6.2197e-06	3.766e-06
K01333	5.0096e-06	4.5368e-06	5.6327e-06	5.0912e-06	4.1474e-06	5.246e-06	4.2982e-06	4.4152e-06	4.1983e-06	5.1688e-06	7.5723e-06	4.7246e-06	3.4658e-06	7.6878e-06	7.0843e-06	4.9884e-06	3.8433e-06	6.4331e-06	7.1082e-06	4.9248e-06
K01334	6.1883e-06	5.7466e-06	5.0398e-06	5.6901e-06	5.6286e-06	2.3316e-06	7.3683e-06	4.7096e-06	5.8776e-06	4.8817e-06	4.0774e-06	5.9058e-06	6.6429e-06	5.3223e-06	7.6746e-06	4.7113e-06	3.5477e-06	4.6786e-06	2.9618e-06	5.5042e-06
K01335	5.3042e-06	5.4441e-06	8.3009e-06	5.0912e-06	7.1099e-06	3.7888e-06	6.7543e-06	3.5322e-06	3.6385e-06	6.3175e-06	3.4949e-06	5.0199e-06	4.6211e-06	3.8439e-06	3.5421e-06	7.4826e-06	3.252e-06	6.4331e-06	4.4426e-06	7.8217e-06
K01336	5.3042e-06	5.7466e-06	6.5221e-06	4.7917e-06	6.8136e-06	4.3717e-06	7.6753e-06	3.5322e-06	4.4782e-06	6.3175e-06	5.8249e-06	4.4293e-06	5.4876e-06	8.2792e-06	5.9036e-06	4.157e-06	5.6172e-06	7.0179e-06	5.035e-06	5.7939e-06
K01337	4.4202e-06	4.5368e-06	6.5221e-06	4.7917e-06	7.7024e-06	4.0802e-06	5.8332e-06	2.9435e-06	4.4782e-06	4.5945e-06	2.9124e-06	3.8388e-06	3.4658e-06	5.618e-06	5.6084e-06	6.0969e-06	4.4346e-06	4.0938e-06	3.8503e-06	6.0836e-06
K01338	0.00086046	0.00088981	0.00078176	0.0010437	0.0010058	0.00089415	0.001127	0.00078267	0.00054494	0.00084424	0.00098557	0.0011457	0.00091585	0.00079303	0.00094044	0.00083999	0.0009558	0.00081116	0.00075673	0.0011107
K01339	6.1883e-06	4.5368e-06	5.0398e-06	5.3906e-06	6.8136e-06	4.6631e-06	5.8332e-06	5.5926e-06	4.1983e-06	8.0404e-06	4.6599e-06	3.5435e-06	8.0869e-06	2.3655e-06	5.6084e-06	4.157e-06	4.4346e-06	4.971e-06	6.812e-06	3.1866e-06
K01340	3.8308e-06	7.5613e-06	6.2257e-06	6.2891e-06	2.6662e-06	4.3717e-06	6.4472e-06	3.8265e-06	5.5977e-06	7.4661e-06	4.0774e-06	6.7917e-06	4.0435e-06	4.4353e-06	6.7891e-06	4.7113e-06	3.8433e-06	4.6786e-06	7.1082e-06	2.8969e-06
K01341	3.8308e-06	6.049e-06	5.3363e-06	7.487e-06	3.8512e-06	5.246e-06	4.6052e-06	3.8265e-06	3.6385e-06	5.456e-06	4.0774e-06	5.6105e-06	4.9099e-06	5.3223e-06	6.1987e-06	4.157e-06	4.7302e-06	7.0179e-06	5.6273e-06	5.7939e-06
K01342	5.8936e-06	5.4441e-06	4.4469e-06	7.1875e-06	3.8512e-06	6.9947e-06	7.6753e-06	5.5926e-06	4.1983e-06	5.456e-06	6.6986e-06	7.6775e-06	5.4876e-06	4.7309e-06	3.8373e-06	6.6512e-06	4.139e-06	6.1407e-06	4.1465e-06	4.3454e-06
K01343	7.367e-06	2.4196e-06	5.3363e-06	7.1875e-06	5.9249e-06	3.7888e-06	5.2192e-06	4.4152e-06	6.1575e-06	5.1688e-06	7.8636e-06	6.4964e-06	6.0652e-06	4.1396e-06	4.7228e-06	4.7113e-06	5.9128e-06	4.6786e-06	4.7388e-06	4.6351e-06
K01344	6.1883e-06	4.2343e-06	5.6327e-06	4.7917e-06	4.1474e-06	6.4118e-06	7.0613e-06	8.5361e-06	5.8776e-06	5.7431e-06	3.4949e-06	3.5435e-06	5.7764e-06	6.5051e-06	5.9036e-06	4.4341e-06	4.7302e-06	6.7255e-06	6.5159e-06	4.6351e-06
K01345	4.7149e-06	4.2343e-06	5.3363e-06	6.2891e-06	5.3324e-06	2.3316e-06	8.5963e-06	5.2983e-06	3.9184e-06	5.456e-06	4.9511e-06	7.0869e-06	4.0435e-06	5.618e-06	5.3132e-06	5.5427e-06	3.8433e-06	4.0938e-06	7.7006e-06	3.766e-06
K01346	3.8308e-06	4.2343e-06	5.3363e-06	4.1927e-06	4.7399e-06	7.2861e-06	8.5963e-06	2.9435e-06	5.8776e-06	5.7431e-06	6.1161e-06	5.3152e-06	5.4876e-06	4.7309e-06	6.4939e-06	3.0485e-06	5.6172e-06	4.6786e-06	5.035e-06	4.9248e-06
K01347	0.00063002	3.1455e-05	0.00056179	0.00020484	3.9401e-05	7.4901e-05	0.00082955	5.1511e-05	0.00032831	0.00055651	0.00023212	0.00021527	0.00039337	0.00044707	0.00017534	0.00039935	0.00035772	0.00050091	0.00028374	0.00064747
K01348	5.3042e-06	6.6539e-06	7.708e-06	4.4922e-06	5.0362e-06	4.9546e-06	5.5262e-06	3.2378e-06	4.4782e-06	6.0303e-06	3.7862e-06	6.2011e-06	4.0435e-06	4.7309e-06	7.0843e-06	5.2655e-06	5.0259e-06	5.2635e-06	4.1465e-06	7.2423e-06
K01349	5.3042e-06	6.9564e-06	4.4469e-06	3.8932e-06	4.7399e-06	3.4973e-06	4.6052e-06	7.6531e-06	2.7989e-06	5.1688e-06	7.2811e-06	6.4964e-06	4.3323e-06	4.4353e-06	4.4277e-06	2.7713e-06	3.5477e-06	5.8483e-06	3.8503e-06	6.9526e-06
K01350	4.7149e-06	4.2343e-06	3.5575e-06	5.0912e-06	7.4061e-06	3.7888e-06	5.2192e-06	3.2378e-06	6.4374e-06	6.6046e-06	4.9511e-06	2.9529e-06	6.9317e-06	5.618e-06	4.4277e-06	5.8198e-06	5.3215e-06	6.7255e-06	5.3312e-06	4.6351e-06
K01351	6.1883e-06	6.3515e-06	4.1504e-06	3.8932e-06	5.9249e-06	3.2059e-06	4.2982e-06	3.5322e-06	5.5977e-06	5.1688e-06	2.9124e-06	5.6105e-06	5.1988e-06	4.7309e-06	5.018e-06	5.5427e-06	5.3215e-06	3.509e-06	5.6273e-06	7.2423e-06
K01352	7.367e-06	3.327e-06	4.7434e-06	5.6901e-06	4.7399e-06	4.9546e-06	6.1402e-06	5.0039e-06	5.5977e-06	4.0202e-06	5.8249e-06	4.1341e-06	4.3323e-06	5.0266e-06	5.018e-06	4.7113e-06	4.139e-06	4.3862e-06	5.3312e-06	4.6351e-06
K01353	4.7149e-06	5.4441e-06	5.0398e-06	6.2891e-06	7.4061e-06	4.9546e-06	6.1402e-06	3.8265e-06	6.1575e-06	4.5945e-06	3.2037e-06	3.2482e-06	5.4876e-06	4.1396e-06	4.7228e-06	3.0485e-06	5.9128e-06	5.5559e-06	3.2579e-06	4.0557e-06
K01354	0.00026668	0.00021897	0.00017373	0.00019676	0.00025418	0.00027192	0.00013631	0.00034321	0.00034874	0.00021192	0.00022659	0.00022294	0.00012304	0.00014962	0.00014464	0.00025967	0.00023533	0.00024592	0.00013772	0.00017092
K01355	1.3261e-05	4.3251e-05	3.5872e-05	2.9948e-05	4.4733e-05	2.011e-05	1.0438e-05	2.237e-05	7.0531e-05	2.2973e-05	5.0385e-05	3.0415e-05	2.455e-05	2.2768e-05	3.4831e-05	4.6004e-05	3.459e-05	3.392e-05	2.9914e-05	4.9538e-05
K01356	0.00019596	0.00021383	0.00021612	0.00024887	0.00021952	0.0001807	0.00018758	0.00021635	0.00021635	0.00021738	0.00025105	0.00025365	0.00022932	0.00018658	0.00021578	0.00021228	0.00017591	0.00023715	0.00022272	0.00024045
K01357	4.7149e-06	4.5368e-06	4.7434e-06	6.888e-06	7.7024e-06	4.6631e-06	7.3683e-06	6.77e-06	5.8776e-06	3.1587e-06	4.3686e-06	5.6105e-06	5.4876e-06	5.3223e-06	4.7228e-06	4.4341e-06	2.6608e-06	3.2166e-06	6.2197e-06	5.5042e-06
K01358	0.00050213	0.00051084	0.00054638	0.00048396	0.00040882	0.0004669	0.00044517	0.00050069	0.00050799	0.00050396	0.00046715	0.00045888	0.00047049	0.00048699	0.00047169	0.000429	0.0004813	0.00047137	0.00049639	0.00049248
K01359	7.367e-06	6.9564e-06	4.1504e-06	5.3906e-06	4.7399e-06	3.7888e-06	6.1402e-06	6.77e-06	5.0379e-06	5.456e-06	6.4073e-06	5.0199e-06	6.0652e-06	4.7309e-06	5.9036e-06	3.8799e-06	5.3215e-06	7.8952e-06	2.9618e-06	3.4763e-06
K01360	7.0723e-06	5.4441e-06	5.6327e-06	4.1927e-06	6.8136e-06	7.2861e-06	7.6753e-06	6.4757e-06	4.1983e-06	4.5945e-06	6.1161e-06	4.7246e-06	4.6211e-06	4.1396e-06	6.1987e-06	6.0969e-06	4.4346e-06	7.3104e-06	3.8503e-06	3.766e-06
K01361	3.5656e-05	0.00021535	0.00014023	8.5951e-05	3.4068e-05	0.00022266	4.4824e-05	0.00013834	5.7097e-05	8.8157e-05	5.3589e-05	4.075e-05	0.00015365	0.00021969	4.4277e-05	0.00011612	3.3999e-05	0.00016931	4.028e-05	1.2167e-05
K01362	0.0011257	0.0014469	0.0013593	0.0015423	0.0011331	0.0015406	0.0016032	0.0011892	0.00096952	0.0011501	0.0015855	0.0014847	0.0015538	0.0012147	0.0013847	0.00097717	0.0012565	0.00097315	0.0013464	0.0015371
K01363	6.7776e-06	4.8392e-06	4.7434e-06	4.4922e-06	6.8136e-06	4.6631e-06	5.8332e-06	4.7096e-06	4.4782e-06	5.456e-06	4.6599e-06	4.7246e-06	5.4876e-06	4.7309e-06	4.7228e-06	4.7113e-06	2.9564e-06	2.9241e-06	6.2197e-06	6.663e-06
K01364	5.3042e-06	6.3515e-06	4.7434e-06	6.888e-06	4.4437e-06	4.9546e-06	7.9823e-06	3.8265e-06	3.9184e-06	4.8817e-06	5.2424e-06	7.9728e-06	4.0435e-06	6.8007e-06	7.0843e-06	6.9283e-06	2.9564e-06	5.5559e-06	2.6656e-06	4.9248e-06
K01365	6.1883e-06	5.4441e-06	8.8938e-06	5.0912e-06	6.5174e-06	4.0802e-06	3.9912e-06	6.1813e-06	4.7581e-06	6.6046e-06	7.5723e-06	7.0869e-06	5.4876e-06	4.7309e-06	5.018e-06	4.7113e-06	5.6172e-06	5.5559e-06	7.7006e-06	5.5042e-06
K01366	5.3042e-06	4.8392e-06	4.4469e-06	6.2891e-06	4.7399e-06	5.246e-06	4.9122e-06	4.1209e-06	6.1575e-06	5.7431e-06	3.4949e-06	6.2011e-06	5.4876e-06	6.2094e-06	3.8373e-06	5.5427e-06	2.9564e-06	5.2635e-06	4.7388e-06	4.6351e-06
K01367	8.251e-06	6.9564e-06	6.2257e-06	4.7917e-06	8.5911e-06	5.8289e-06	6.1402e-06	5.2983e-06	3.9184e-06	8.0404e-06	5.5336e-06	5.6105e-06	8.0869e-06	5.3223e-06	6.4939e-06	5.2655e-06	5.0259e-06	5.8483e-06	3.5541e-06	6.663e-06
K01368	4.7149e-06	6.3515e-06	3.5575e-06	5.0912e-06	6.5174e-06	5.246e-06	4.6052e-06	6.4757e-06	3.6385e-06	2.8716e-06	5.2424e-06	5.0199e-06	4.9099e-06	5.0266e-06	4.4277e-06	4.7113e-06	3.5477e-06	5.8483e-06	7.4044e-06	6.0836e-06
K01369	3.8308e-06	3.9319e-06	5.9292e-06	5.0912e-06	4.1474e-06	4.0802e-06	5.5262e-06	5.2983e-06	4.4782e-06	6.0303e-06	6.6986e-06	5.3152e-06	5.7764e-06	5.0266e-06	5.018e-06	3.6027e-06	5.9128e-06	6.1407e-06	2.9618e-06	5.7939e-06
K01370	6.1883e-06	6.3515e-06	6.5221e-06	5.0912e-06	6.8136e-06	7.2861e-06	5.2192e-06	5.887e-06	6.4374e-06	4.8817e-06	5.8249e-06	5.3152e-06	5.1988e-06	4.1396e-06	5.3132e-06	5.2655e-06	6.5041e-06	9.3573e-06	4.1465e-06	6.0836e-06
K01371	7.367e-06	5.7466e-06	3.5575e-06	7.1875e-06	5.9249e-06	7.869e-06	7.3683e-06	4.7096e-06	5.8776e-06	3.733e-06	3.2037e-06	5.3152e-06	3.177e-06	3.8439e-06	5.3132e-06	6.6512e-06	4.139e-06	4.3862e-06	4.7388e-06	3.4763e-06
K01372	0.00039487	0.00037897	0.00038036	0.00030577	0.00024914	0.0004223	0.00036841	0.0003491	0.00037981	0.0003176	0.00028513	0.0002197	0.00030355	0.0003223	0.00028337	0.00023667	0.00030983	0.00036669	0.00037674	0.00021119
K01373	4.1255e-06	6.9564e-06	5.0398e-06	5.6901e-06	5.9249e-06	5.5375e-06	5.2192e-06	4.4152e-06	3.3586e-06	5.7431e-06	6.1161e-06	4.7246e-06	5.4876e-06	5.618e-06	5.9036e-06	6.0969e-06	5.9128e-06	5.2635e-06	8.5891e-06	5.2145e-06
K01374	6.4829e-06	4.2343e-06	2.9646e-06	6.5886e-06	5.6286e-06	4.9546e-06	4.9122e-06	5.0039e-06	7.277e-06	6.6046e-06	6.4073e-06	3.2482e-06	3.4658e-06	5.9137e-06	4.1325e-06	3.3256e-06	5.3215e-06	5.5559e-06	4.7388e-06	4.9248e-06
K01375	6.1883e-06	5.4441e-06	5.9292e-06	5.6901e-06	4.7399e-06	6.7032e-06	7.3683e-06	4.1209e-06	4.4782e-06	6.3175e-06	6.9898e-06	4.4293e-06	3.4658e-06	5.9137e-06	6.1987e-06	3.6027e-06	5.3215e-06	4.3862e-06	5.3312e-06	4.6351e-06
K01376	7.0723e-06	5.4441e-06	3.5575e-06	4.4922e-06	7.1099e-06	4.6631e-06	5.2192e-06	4.4152e-06	5.0379e-06	4.8817e-06	4.3686e-06	5.9058e-06	6.9317e-06	6.5051e-06	4.4277e-06	5.8198e-06	5.3215e-06	3.509e-06	5.9235e-06	6.0836e-06
K01377	3.8308e-06	3.327e-06	5.0398e-06	4.4922e-06	6.5174e-06	4.9546e-06	5.8332e-06	2.9435e-06	4.7581e-06	7.4661e-06	9.0285e-06	3.2482e-06	6.354e-06	7.3921e-06	5.9036e-06	3.0485e-06	3.252e-06	3.8014e-06	6.2197e-06	6.3733e-06
K01378	4.7149e-06	4.5368e-06	5.3363e-06	6.2891e-06	4.4437e-06	3.2059e-06	4.9122e-06	5.887e-06	3.6385e-06	2.5844e-06	4.3686e-06	4.1341e-06	4.0435e-06	5.0266e-06	6.7891e-06	6.9283e-06	5.9128e-06	5.8483e-06	3.8503e-06	5.7939e-06
K01379	7.6617e-06	5.1417e-06	3.5575e-06	3.8932e-06	3.8512e-06	4.6631e-06	5.5262e-06	6.4757e-06	5.0379e-06	4.3074e-06	4.6599e-06	5.6105e-06	4.6211e-06	2.6612e-06	7.9698e-06	3.6027e-06	4.4346e-06	4.0938e-06	3.5541e-06	5.2145e-06
K01380	3.2415e-06	5.7466e-06	3.854e-06	6.5886e-06	5.0362e-06	4.3717e-06	6.7543e-06	3.5322e-06	4.7581e-06	4.8817e-06	6.1161e-06	5.9058e-06	4.6211e-06	7.0964e-06	5.018e-06	5.2655e-06	5.0259e-06	5.8483e-06	4.7388e-06	5.2145e-06
K01381	4.1255e-06	5.1417e-06	5.3363e-06	3.8932e-06	6.5174e-06	3.7888e-06	6.1402e-06	3.2378e-06	6.4374e-06	5.1688e-06	4.6599e-06	5.0199e-06	6.354e-06	6.2094e-06	5.018e-06	5.5427e-06	3.252e-06	3.8014e-06	5.3312e-06	4.3454e-06
K01382	4.7149e-06	3.6294e-06	6.8186e-06	5.3906e-06	5.9249e-06	4.6631e-06	5.2192e-06	6.1813e-06	3.9184e-06	6.6046e-06	4.9511e-06	5.3152e-06	3.7547e-06	3.8439e-06	7.6746e-06	6.9283e-06	6.2084e-06	4.0938e-06	5.035e-06	7.2423e-06
K01383	4.1255e-06	3.6294e-06	4.1504e-06	6.2891e-06	5.3324e-06	4.3717e-06	4.2982e-06	5.0039e-06	5.3178e-06	6.3175e-06	5.5336e-06	6.7917e-06	4.3323e-06	5.3223e-06	4.7228e-06	4.7113e-06	4.139e-06	7.0179e-06	6.5159e-06	3.766e-06
K01384	3.5362e-06	3.6294e-06	4.1504e-06	7.7865e-06	7.7024e-06	4.9546e-06	5.8332e-06	7.0644e-06	6.9971e-06	5.1688e-06	3.4949e-06	3.8388e-06	5.7764e-06	5.0266e-06	5.018e-06	3.0485e-06	5.0259e-06	3.8014e-06	5.3312e-06	5.7939e-06
K01385	7.0723e-06	4.8392e-06	7.115e-06	5.6901e-06	5.3324e-06	4.9546e-06	7.3683e-06	4.4152e-06	4.1983e-06	3.4459e-06	6.9898e-06	7.0869e-06	3.177e-06	5.0266e-06	4.1325e-06	3.3256e-06	2.6608e-06	4.6786e-06	3.2579e-06	5.5042e-06
K01386	5.0096e-06	3.327e-06	3.854e-06	6.2891e-06	4.7399e-06	5.8289e-06	5.5262e-06	4.7096e-06	6.4374e-06	5.1688e-06	4.6599e-06	6.7917e-06	3.4658e-06	4.7309e-06	5.9036e-06	4.7113e-06	6.7997e-06	6.1407e-06	6.812e-06	6.0836e-06
K01387	3.7719e-05	0.0002843	0.00026385	0.00016232	0.00016234	0.00011133	7.0613e-06	0.0001354	8.7045e-05	0.00022599	0.00025018	0.00014351	0.00023741	0.00026316	0.00015733	1.6351e-05	0.00029741	2.3393e-05	0.00028522	0.00020018
K01388	4.7149e-06	7.8637e-06	5.6327e-06	5.3906e-06	5.3324e-06	4.3717e-06	5.5262e-06	5.0039e-06	5.8776e-06	4.8817e-06	4.6599e-06	5.0199e-06	4.6211e-06	5.0266e-06	5.3132e-06	5.5427e-06	4.4346e-06	5.8483e-06	2.3694e-06	3.4763e-06
K01389	4.7149e-06	3.9319e-06	5.9292e-06	5.3906e-06	6.8136e-06	6.9947e-06	5.2192e-06	6.77e-06	3.9184e-06	5.7431e-06	6.4073e-06	5.9058e-06	5.1988e-06	5.0266e-06	4.1325e-06	6.0969e-06	6.2084e-06	4.6786e-06	6.812e-06	4.9248e-06
K01390	0.00026786	0.00011191	0.00012451	8.8047e-05	0.00015316	0.00035236	0.00021921	0.00033497	0.00030899	0.00016655	6.0579e-05	0.00010867	0.0001213	0.00010556	0.00021666	0.00028268	7.4501e-05	4.7371e-05	7.8783e-05	0.00010921
K01392	5.0096e-06	4.8392e-06	4.4469e-06	4.4922e-06	5.3324e-06	4.6631e-06	5.2192e-06	6.1813e-06	5.3178e-06	5.1688e-06	4.9511e-06	4.7246e-06	4.6211e-06	3.8439e-06	4.7228e-06	4.157e-06	6.5041e-06	7.3104e-06	7.4044e-06	6.9526e-06
K01393	6.1883e-06	6.6539e-06	2.9646e-06	5.9896e-06	5.9249e-06	4.9546e-06	3.9912e-06	6.1813e-06	3.9184e-06	6.3175e-06	4.0774e-06	5.6105e-06	4.3323e-06	6.8007e-06	5.018e-06	3.8799e-06	4.139e-06	6.1407e-06	2.9618e-06	5.5042e-06
K01394	4.7149e-06	5.4441e-06	4.7434e-06	6.2891e-06	6.5174e-06	4.0802e-06	5.2192e-06	6.4757e-06	5.5977e-06	6.3175e-06	5.2424e-06	5.0199e-06	4.9099e-06	6.5051e-06	6.1987e-06	5.2655e-06	7.0954e-06	4.6786e-06	4.1465e-06	4.9248e-06
K01395	5.0096e-06	9.0735e-06	3.854e-06	6.5886e-06	5.3324e-06	3.7888e-06	5.5262e-06	5.887e-06	5.3178e-06	7.1789e-06	5.8249e-06	6.2011e-06	4.9099e-06	4.1396e-06	4.1325e-06	4.4341e-06	6.2084e-06	2.6317e-06	5.6273e-06	4.6351e-06
K01396	6.4829e-06	4.5368e-06	2.6681e-06	2.9948e-06	5.6286e-06	3.4973e-06	3.9912e-06	5.0039e-06	5.5977e-06	6.0303e-06	4.9511e-06	2.9529e-06	5.4876e-06	5.0266e-06	6.1987e-06	3.6027e-06	2.3651e-06	4.0938e-06	8.2929e-06	5.2145e-06
K01397	3.5362e-06	6.6539e-06	4.4469e-06	6.2891e-06	6.5174e-06	6.9947e-06	5.8332e-06	5.2983e-06	3.3586e-06	4.5945e-06	4.0774e-06	4.7246e-06	4.6211e-06	7.9835e-06	5.018e-06	6.3741e-06	5.9128e-06	3.8014e-06	4.7388e-06	4.6351e-06
K01398	7.0723e-06	4.5368e-06	6.5221e-06	5.6901e-06	5.0362e-06	4.3717e-06	6.1402e-06	7.0644e-06	6.1575e-06	4.8817e-06	4.6599e-06	6.2011e-06	5.7764e-06	6.2094e-06	5.018e-06	3.3256e-06	6.5041e-06	4.3862e-06	4.1465e-06	5.7939e-06
K01399	4.5381e-05	1.1493e-05	2.0456e-05	2.6354e-05	6.7544e-05	9.1514e-05	3.5306e-05	9.0954e-05	4.7581e-06	4.1063e-05	2.4173e-05	7.0279e-05	2.1373e-05	5.2632e-05	7.0843e-06	5.4041e-05	9.4605e-05	4.4739e-05	4.6796e-05	3.0997e-05
K01400	1.2966e-05	5.9583e-05	5.6624e-05	4.3724e-05	4.0586e-05	2.6522e-05	3.6841e-06	3.4439e-05	2.2111e-05	5.3124e-05	5.3589e-05	3.7797e-05	6.0652e-05	6.032e-05	4.5162e-05	5.8198e-06	6.2084e-05	9.3573e-06	6.1605e-05	4.6641e-05
K01401	8.5752e-05	0.00015183	0.00013845	7.2474e-05	5.4805e-05	6.3535e-05	0.00013478	7.3881e-05	0.0001489	0.00011228	4.7473e-05	7.146e-05	9.3578e-05	0.00014104	0.00012102	4.8221e-05	9.0761e-05	9.2695e-05	9.8626e-05	5.2145e-05
K01402	5.3042e-06	6.6539e-06	5.3363e-06	5.0912e-06	6.5174e-06	4.3717e-06	7.3683e-06	7.6531e-06	4.7581e-06	6.3175e-06	6.6986e-06	5.3152e-06	4.3323e-06	5.9137e-06	7.6746e-06	4.157e-06	4.7302e-06	4.3862e-06	5.035e-06	6.0836e-06
K01403	5.8936e-06	3.9319e-06	3.2611e-06	6.5886e-06	5.9249e-06	3.4973e-06	7.0613e-06	4.7096e-06	6.1575e-06	5.456e-06	3.4949e-06	4.1341e-06	4.0435e-06	7.3921e-06	4.7228e-06	3.0485e-06	3.5477e-06	5.2635e-06	5.3312e-06	4.6351e-06
K01404	3.5362e-06	4.2343e-06	4.7434e-06	7.487e-06	7.4061e-06	6.4118e-06	6.7543e-06	6.4757e-06	5.3178e-06	4.8817e-06	4.3686e-06	5.6105e-06	6.0652e-06	5.9137e-06	4.7228e-06	4.7113e-06	6.7997e-06	5.5559e-06	6.5159e-06	2.8969e-06
K01405	3.5362e-06	6.6539e-06	6.5221e-06	7.7865e-06	5.6286e-06	5.246e-06	5.2192e-06	3.8265e-06	4.7581e-06	5.1688e-06	6.6986e-06	6.7917e-06	5.1988e-06	6.5051e-06	3.8373e-06	5.8198e-06	6.2084e-06	4.0938e-06	4.7388e-06	5.2145e-06
K01406	6.1883e-06	4.2343e-06	7.115e-06	5.0912e-06	6.2211e-06	4.0802e-06	9.2104e-06	2.6491e-06	5.0379e-06	5.1688e-06	5.2424e-06	7.0869e-06	6.9317e-06	5.3223e-06	5.9036e-06	3.6027e-06	5.6172e-06	5.2635e-06	5.035e-06	3.4763e-06
K01407	4.155e-05	0.00012007	7.4115e-05	8.5651e-05	0.00010635	4.8089e-05	2.0877e-05	4.2092e-05	0.00017857	6.26e-05	0.00013222	7.5889e-05	7.7692e-05	4.524e-05	0.00010184	0.0001333	8.8988e-05	9.4742e-05	7.7598e-05	0.00012022
K01408	7.6617e-06	6.049e-06	4.7434e-06	6.2891e-06	5.6286e-06	4.6631e-06	6.7543e-06	6.4757e-06	3.3586e-06	4.5945e-06	3.2037e-06	4.1341e-06	3.4658e-06	5.3223e-06	6.1987e-06	4.157e-06	5.6172e-06	4.0938e-06	5.6273e-06	5.7939e-06
K01409	0.00062001	0.0005798	0.00062168	0.00053727	0.00050747	0.00059863	0.00059468	0.00052217	0.00062862	0.00058121	0.00055074	0.00053093	0.00057735	0.00054731	0.00058593	0.00055759	0.00053659	0.00059769	0.00056125	0.00054433
K01410	7.6617e-06	6.6539e-06	5.0398e-06	3.5938e-06	5.9249e-06	4.3717e-06	6.7543e-06	5.0039e-06	3.6385e-06	5.1688e-06	7.8636e-06	7.0869e-06	6.6429e-06	3.8439e-06	6.1987e-06	6.0969e-06	4.139e-06	6.1407e-06	5.035e-06	3.1866e-06
K01411	4.7149e-06	7.5613e-06	3.2611e-06	5.9896e-06	5.0362e-06	7.5776e-06	5.5262e-06	5.0039e-06	3.6385e-06	7.4661e-06	4.9511e-06	5.6105e-06	4.6211e-06	6.2094e-06	5.018e-06	4.7113e-06	4.139e-06	6.7255e-06	5.035e-06	5.7939e-06
K01412	5.3042e-06	3.6294e-06	5.9292e-06	4.7917e-06	5.3324e-06	6.4118e-06	8.2893e-06	5.0039e-06	2.7989e-06	6.6046e-06	6.1161e-06	5.9058e-06	5.4876e-06	6.5051e-06	5.3132e-06	3.8799e-06	4.7302e-06	5.5559e-06	4.1465e-06	6.9526e-06
K01413	5.5989e-06	3.9319e-06	4.7434e-06	3.5938e-06	6.8136e-06	2.3316e-06	7.9823e-06	5.0039e-06	3.9184e-06	1.4358e-06	3.2037e-06	4.1341e-06	4.9099e-06	8.2792e-06	6.1987e-06	4.4341e-06	5.6172e-06	4.0938e-06	7.4044e-06	5.2145e-06
K01414	0.00022189	0.00018994	0.00025792	0.0002324	0.00024529	0.00027425	0.00035306	0.00021105	0.00023398	0.00021968	0.00029416	0.00033899	0.00023452	0.00027706	0.00021105	0.00026716	0.00032047	0.00030148	0.00025086	0.00034416
K01415	3.2415e-06	6.049e-06	6.2257e-06	8.9844e-06	4.7399e-06	5.246e-06	4.9122e-06	5.2983e-06	5.0379e-06	6.0303e-06	5.2424e-06	4.7246e-06	7.5093e-06	6.2094e-06	6.1987e-06	5.2655e-06	5.9128e-06	4.971e-06	4.4426e-06	4.3454e-06
K01416	4.1255e-06	6.6539e-06	2.9646e-06	5.9896e-06	3.8512e-06	4.9546e-06	5.8332e-06	4.4152e-06	5.0379e-06	4.8817e-06	3.7862e-06	5.3152e-06	4.6211e-06	5.3223e-06	6.1987e-06	4.7113e-06	6.2084e-06	5.8483e-06	3.8503e-06	4.9248e-06
K01417	0.00068837	0.0010828	0.0010379	0.0008053	0.00070032	0.00082916	0.00066929	0.00078856	0.00084358	0.00091948	0.00093722	0.00079315	0.00091094	0.0008498	0.00086546	0.00064461	0.00089254	0.00062898	0.00085713	0.00090442
K01419	0.00013467	0.00016635	0.00017669	0.00012788	0.00015642	0.00015913	0.00013846	0.00012922	0.00016261	0.00017459	0.00015523	0.00013052	0.00015307	0.00016617	0.00016087	0.00016185	0.00018034	0.00017048	0.00017948	0.00013905
K01420	0.00019066	0.00015274	0.00014378	0.00021952	0.00022959	0.00013785	0.00024008	0.00015306	9.9359e-05	0.0001743	0.00021377	0.00022235	0.00019929	0.0001573	0.00020013	0.00021672	0.00016349	0.00020352	0.00015757	0.00024045
K01421	0.00079622	0.0013734	0.0010981	0.0012845	0.00066329	0.0009029	0.0009631	0.00091572	0.0011478	0.0012491	0.00095411	0.0010415	0.0013222	0.00073418	0.00093247	0.00077043	0.00077517	0.00099538	0.0010446	0.0011431
K01422	0.00020981	8.4686e-05	0.00010139	0.00017579	0.00018071	0.00026696	8.8419e-05	0.00023342	0.00010804	0.0002191	0.00015844	0.00018721	0.00023568	0.00022354	0.00010715	0.00020536	0.00023089	0.00017574	0.00019103	0.00010139
K01423	0.00010962	0.00016816	0.00013104	0.0001144	4.5325e-05	0.00010434	0.00011359	4.2092e-05	0.0001086	0.00011601	0.00012174	0.00012757	9.2133e-05	7.1556e-05	0.0001284	6.9283e-05	0.00011766	0.00010468	6.427e-05	0.00012515
K01424	0.00067599	0.00066993	0.00070231	0.00061723	0.00056049	0.0006097	0.00062876	0.00060547	0.00071399	0.00058925	0.00062676	0.00058231	0.00057533	0.00059226	0.00064733	0.00058558	0.00061966	0.00066495	0.00061723	0.00060546
K01425	0.00023545	0.00023863	0.0002766	0.00018418	0.00027077	0.0002521	0.00026127	0.00023813	0.0002449	0.00014415	0.00025105	0.00022324	0.00015163	0.00029302	0.00021961	0.00018374	0.00033259	0.00027195	0.00030861	0.00018511
K01426	0.00045793	0.00054713	0.00050576	0.0006343	0.00064433	0.00083499	0.00044302	0.00072145	0.00026981	0.00064007	0.00064889	0.00077011	0.00066891	0.0007265	0.00041768	0.00057533	0.00087628	0.00052927	0.00067321	0.00060575
K01427	7.367e-06	5.7466e-06	7.115e-06	3.8932e-06	3.2587e-06	4.3717e-06	6.7543e-06	5.0039e-06	4.7581e-06	4.3074e-06	6.9898e-06	4.1341e-06	3.7547e-06	3.8439e-06	5.9036e-06	3.8799e-06	1.0052e-05	6.1407e-06	3.5541e-06	4.9248e-06
K01428	0.00035686	0.00038381	0.00040674	0.00033721	0.00036645	0.00041414	0.00039574	0.00035587	0.00031627	0.00039743	0.00039172	0.00042846	0.00032521	0.00046393	0.0004103	0.00032646	0.00044789	0.00037721	0.00037466	0.00035806
K01429	6.7776e-05	6.3515e-05	7.4708e-05	5.1511e-05	6.5174e-05	6.4409e-05	6.5086e-05	7.0349e-05	5.4578e-05	7.2076e-05	5.8249e-05	6.1715e-05	5.6897e-05	8.6044e-05	6.9072e-05	5.7921e-05	7.1249e-05	7.2519e-05	7.6413e-05	4.4033e-05
K01430	5.7168e-05	5.7768e-05	6.9668e-05	5.3008e-05	6.7544e-05	4.9837e-05	6.4472e-05	6.6228e-05	5.0659e-05	6.4036e-05	4.922e-05	5.9058e-05	5.5453e-05	8.7227e-05	6.2578e-05	5.7644e-05	6.3267e-05	6.1992e-05	6.9897e-05	5.2145e-05
K01431	9.4887e-05	2.1474e-05	2.6385e-05	0.00012788	0.00011554	2.827e-05	2.7938e-05	7.8885e-05	1.6233e-05	6.9205e-05	0.00010805	3.6911e-05	7.1916e-05	8.427e-05	7.2909e-05	0.00011917	2.3947e-05	9.1526e-05	7.6413e-05	8.9226e-05
K01432	2.3574e-06	5.4441e-06	4.1504e-06	5.9896e-06	6.8136e-06	3.2059e-06	3.9912e-06	5.2983e-06	4.1983e-06	4.5945e-06	3.7862e-06	6.4964e-06	3.7547e-06	5.618e-06	5.9036e-06	6.0969e-06	3.8433e-06	4.6786e-06	5.3312e-06	3.1866e-06
K01433	0.00027111	0.00023107	0.0002265	0.00027462	0.00027965	0.00028795	0.0002321	0.00031201	0.00026561	0.00020101	0.00029998	0.00026842	0.00016203	0.00023123	0.00022434	0.00028101	0.00027347	0.00029826	0.00020051	0.0002445
K01434	0.00030175	0.00014034	0.00020693	0.00025905	0.00046688	0.00041939	0.00025697	0.00048067	0.00011419	0.00030151	0.00034774	0.00038771	0.000266	0.00048374	0.00023467	0.00035501	0.00049017	0.00035031	0.00038888	0.0002755
K01435	5.3042e-06	2.7221e-06	4.1504e-06	8.3854e-06	6.5174e-06	5.246e-06	4.9122e-06	6.1813e-06	4.7581e-06	2.5844e-06	3.7862e-06	6.7917e-06	2.5994e-06	4.7309e-06	5.3132e-06	5.8198e-06	4.139e-06	6.7255e-06	3.8503e-06	4.3454e-06
K01436	7.1312e-05	0.000271	0.00022264	0.00021593	0.00018456	0.00011745	0.00014675	0.00010861	8.9843e-05	0.00020503	0.00025426	0.0002132	0.00026716	0.00019486	0.00019157	5.8198e-05	0.00022114	5.5559e-05	0.00022035	0.0002474
K01437	6.1883e-06	6.3515e-06	4.1504e-06	4.4922e-06	5.0362e-06	5.246e-06	7.6753e-06	3.8265e-06	3.9184e-06	4.0202e-06	4.6599e-06	4.4293e-06	4.9099e-06	6.5051e-06	2.9518e-06	4.9884e-06	6.7997e-06	3.8014e-06	4.4426e-06	5.5042e-06
K01438	0.00021217	0.00029822	0.00026592	0.00025905	0.00028499	0.00023286	0.00014951	0.00028905	0.00020852	0.00026447	0.00030231	0.00023682	0.0002247	0.00034122	0.00019009	0.00019704	0.00040325	0.00024767	0.00032935	0.000239
K01439	0.00075909	0.00068052	0.00071832	0.00066514	0.00065203	0.00066333	0.00067604	0.00066523	0.00089927	0.00084654	0.00066578	0.00057375	0.00078646	0.00075754	0.00077366	0.00079787	0.0006238	0.00076554	0.00077776	0.00068281
K01440	7.6617e-06	5.7466e-06	3.854e-06	4.4922e-06	4.1474e-06	4.6631e-06	7.6753e-06	5.5926e-06	7.5569e-06	6.0303e-06	5.2424e-06	4.1341e-06	6.354e-06	5.0266e-06	4.4277e-06	6.0969e-06	4.139e-06	7.3104e-06	7.4044e-06	4.0557e-06
K01441	5.5989e-06	4.8392e-06	6.5221e-06	7.487e-06	6.2211e-06	3.7888e-06	5.8332e-06	5.2983e-06	4.4782e-06	4.0202e-06	4.9511e-06	5.0199e-06	4.0435e-06	7.0964e-06	3.8373e-06	6.0969e-06	3.5477e-06	4.971e-06	5.035e-06	3.4763e-06
K01442	0.00032297	0.00041164	0.00041534	0.00032793	0.00027936	0.00032525	0.00043718	0.00025844	0.0002978	0.00033712	0.00031309	0.00027905	0.00033156	0.00035896	0.00034152	0.00021228	0.00035772	0.00034622	0.00044486	0.00029375
K01443	0.0006589	0.00079333	0.00074411	0.00069869	0.00060345	0.00067965	0.00065608	0.00066994	0.00071455	0.00067999	0.00066636	0.00056696	0.00072003	0.00064489	0.00067182	0.00055925	0.00064509	0.00065969	0.00074992	0.00060952
K01444	3.8308e-06	3.6294e-06	5.6327e-06	2.3958e-06	4.7399e-06	5.8289e-06	7.6753e-06	7.0644e-06	4.4782e-06	7.4661e-06	5.8249e-06	7.3822e-06	5.1988e-06	5.3223e-06	5.018e-06	5.2655e-06	7.0954e-06	5.5559e-06	7.4044e-06	5.7939e-06
K01446	2.9468e-05	7.8637e-06	1.1265e-05	1.6172e-05	1.2146e-05	1.8361e-05	1.0438e-05	7.6531e-06	2.435e-05	2.728e-05	2.0387e-05	2.2737e-05	3.4658e-05	1.2714e-05	1.6235e-05	8.5911e-06	1.833e-05	8.48e-06	2.6063e-05	7.532e-06
K01447	0.00022425	0.00058101	0.00052592	0.00044143	0.00038275	0.00038325	0.00018544	0.00038648	0.00030004	0.00060619	0.0005321	0.00041665	0.00059988	0.00052543	0.00035687	0.00024221	0.00062971	0.00015937	0.00068091	0.00050262
K01448	0.00072815	0.0012419	0.00095905	0.0011569	0.00092725	0.00077699	0.0011694	0.00071497	0.00068292	0.00095193	0.0011102	0.0011735	0.0011365	0.00077528	0.0010015	0.00077237	0.00097886	0.00076232	0.0009214	0.0013172
K01449	3.7424e-05	0.00014699	0.00012955	0.00010512	0.00011554	5.7706e-05	4.5438e-05	7.447e-05	5.4298e-05	0.0001387	0.00012494	0.00010955	0.0001395	0.00011827	8.5011e-05	2.6882e-05	0.00013925	2.3978e-05	0.00014957	0.00011588
K01450	2.3574e-06	4.2343e-06	4.1504e-06	3.8932e-06	6.8136e-06	5.5375e-06	5.8332e-06	5.887e-06	5.0379e-06	6.3175e-06	4.3686e-06	6.7917e-06	2.3106e-06	5.9137e-06	5.6084e-06	4.7113e-06	5.0259e-06	4.3862e-06	4.1465e-06	6.663e-06
K01451	0.00018712	6.9261e-05	7.619e-05	0.00017609	0.00025684	0.00021946	0.00018851	0.00024931	5.0379e-05	0.00016052	0.00014125	0.0002507	0.00013257	0.00019249	0.00015408	0.00022559	0.00018773	0.00018071	0.00015579	0.00016223
K01452	3.4183e-05	4.8392e-06	1.9863e-05	2.0664e-05	3.0809e-05	4.2842e-05	4.9122e-05	3.2084e-05	2.2111e-05	1.6368e-05	2.3008e-05	5.3152e-05	1.6463e-05	4.1987e-05	4.103e-05	3.4919e-05	2.0399e-05	4.6494e-05	2.9321e-05	1.854e-05
K01453	7.809e-05	7.652e-05	0.00011918	0.00010182	7.9986e-05	4.8671e-05	1.8114e-05	0.00010803	0.00010804	9.7633e-05	9.1742e-05	8.8292e-05	0.00010657	9.521e-05	0.00011778	7.8706e-05	6.6519e-05	6.2284e-05	8.5595e-05	0.00010979
K01454	3.2415e-06	4.2343e-06	6.8186e-06	4.4922e-06	7.1099e-06	6.1204e-06	7.6753e-06	5.5926e-06	4.4782e-06	3.733e-06	5.8249e-06	4.7246e-06	5.7764e-06	6.2094e-06	4.4277e-06	6.9283e-06	5.6172e-06	6.1407e-06	5.3312e-06	4.0557e-06
K01455	0.00010166	4.688e-05	6.1664e-05	7.3073e-05	9.0651e-05	6.3535e-05	3.9605e-05	6.1224e-05	5.1219e-05	8.3563e-05	0.00010543	4.2226e-05	4.7655e-05	5.4702e-05	7.8812e-05	0.00011058	6.0606e-05	7.8952e-05	5.2127e-05	8.9805e-05
K01456	5.3042e-06	6.3515e-06	6.5221e-06	6.5886e-06	7.7024e-06	7.2861e-06	3.3771e-06	4.7096e-06	4.7581e-06	4.3074e-06	4.3686e-06	6.2011e-06	5.1988e-06	5.618e-06	5.018e-06	4.9884e-06	3.8433e-06	4.3862e-06	3.2579e-06	3.766e-06
K01457	0.0001606	1.3913e-05	8.5677e-05	8.3854e-05	0.00018367	0.00016234	0.00020846	0.0001457	0.00010076	7.8107e-05	0.00011766	0.00018662	7.7981e-05	0.00016972	0.00013372	0.00014217	8.8692e-05	0.00017486	0.00012558	8.517e-05
K01458	3.8308e-06	5.1417e-06	2.6681e-06	6.5886e-06	5.6286e-06	4.6631e-06	4.9122e-06	5.887e-06	5.0379e-06	6.8918e-06	4.9511e-06	6.4964e-06	4.6211e-06	4.1396e-06	4.1325e-06	5.5427e-06	3.5477e-06	3.509e-06	3.8503e-06	4.6351e-06
K01459	4.7149e-06	4.5368e-06	4.1504e-06	5.0912e-06	5.3324e-06	4.9546e-06	5.2192e-06	3.2378e-06	5.5977e-06	6.0303e-06	4.0774e-06	6.7917e-06	4.6211e-06	4.1396e-06	5.3132e-06	3.3256e-06	3.8433e-06	3.8014e-06	4.7388e-06	4.3454e-06
K01460	3.4772e-05	8.1964e-05	5.7513e-05	6.2591e-05	8.0579e-05	3.4391e-05	1.7193e-05	3.0907e-05	0.00012231	3.6756e-05	8.8247e-05	4.7837e-05	5.0543e-05	3.3708e-05	5.8445e-05	8.4248e-05	7.0954e-05	4.7956e-05	5.5977e-05	7.7058e-05
K01461	4.4202e-06	4.8392e-06	5.3363e-06	5.3906e-06	4.1474e-06	4.0802e-06	8.2893e-06	5.5926e-06	4.7581e-06	4.8817e-06	1.4562e-06	4.7246e-06	5.7764e-06	5.0266e-06	3.8373e-06	5.2655e-06	3.5477e-06	5.2635e-06	3.8503e-06	4.0557e-06
K01462	0.00055311	0.00052869	0.00053956	0.00051031	0.00050391	0.00049721	0.00057012	0.00052129	0.00052367	0.00051028	0.00048987	0.00047099	0.00051323	0.0005204	0.00054047	0.00047889	0.00044878	0.00055325	0.00049669	0.00047046
K01463	0.00015795	0.00030366	0.00029765	0.00023329	0.00022959	0.00026609	0.00020324	0.00024284	0.00018137	0.00025098	0.00030202	0.00028112	0.00026947	0.00031372	0.00026536	0.00012471	0.00031131	0.00010527	0.00031335	0.00026826
K01464	0.00027435	0.00021232	0.00015238	0.00034231	0.00042422	0.00021858	0.00023824	0.0002658	0.00021131	0.00028084	0.00030843	0.00030444	0.00032059	0.00024246	0.00031141	0.00039658	0.00022764	0.00028247	0.00026745	0.00031837
K01465	0.00095977	0.00080694	0.00089561	0.00081069	0.00088192	0.00095915	0.00082648	0.00089011	0.00086961	0.00089708	0.00085888	0.00081411	0.00083671	0.0009178	0.00086015	0.00089569	0.00088692	0.00092841	0.00088764	0.00080593
K01466	6.0704e-05	0.00014639	0.00013163	0.00012458	0.00011761	0.00012736	0.00011912	4.4447e-05	0.00019088	8.586e-05	0.00018785	0.00011812	0.00013777	9.0184e-05	0.00016353	0.00013829	0.00011678	0.00013217	0.00014809	0.00015962
K01467	0.00035303	0.00037413	0.00038095	0.00035129	0.00042363	0.00038296	0.00041661	0.00036352	0.00027989	0.00030123	0.00039085	0.00042551	0.00034427	0.00045388	0.00037074	0.00031122	0.00046356	0.00036055	0.00041316	0.00032851
K01468	0.00026226	0.00024831	0.00030357	0.00029229	0.0002838	0.00027075	0.00030548	0.00028257	0.00023203	0.00020733	0.00028717	0.00028584	0.00023712	0.0003288	0.00028957	0.00024831	0.00028441	0.00024007	0.00028344	0.00028245
K01469	5.0096e-06	4.8392e-06	5.6327e-06	4.7917e-06	5.0362e-06	3.4973e-06	6.7543e-06	3.8265e-06	3.6385e-06	6.0303e-06	5.8249e-06	5.3152e-06	6.0652e-06	5.3223e-06	5.3132e-06	6.6512e-06	3.8433e-06	8.1876e-06	3.8503e-06	4.9248e-06
K01470	4.6559e-05	6.9261e-05	4.0911e-05	6.2591e-05	2.7551e-05	4.43e-05	5.8332e-05	4.0326e-05	3.3586e-05	4.4509e-05	3.6114e-05	3.573e-05	4.2745e-05	3.7848e-05	3.1879e-05	3.2425e-05	5.7945e-05	4.5909e-05	6.3085e-05	4.9248e-05
K01471	5.7462e-05	1.2401e-05	1.3637e-05	8.4453e-05	7.1099e-05	1.603e-05	1.7193e-05	4.9156e-05	9.2362e-06	3.8192e-05	7.1355e-05	2.008e-05	4.3901e-05	5.4702e-05	4.221e-05	7.3163e-05	2.1877e-05	6.1115e-05	4.8869e-05	5.4462e-05
K01473	0.0001883	9.5575e-05	0.00010198	0.0001165	0.00013835	0.00011308	6.7543e-05	8.9776e-05	9.5441e-05	0.00014415	0.00017329	6.7917e-05	8.3469e-05	9.0479e-05	0.0001532	0.00016933	0.00011057	0.00012369	7.2859e-05	0.00013703
K01474	6.6008e-05	1.4215e-05	1.6602e-05	9.1641e-05	8.2949e-05	1.7778e-05	2.2105e-05	4.8567e-05	8.6765e-06	4.5084e-05	7.5432e-05	3.4549e-05	5.2276e-05	6.9486e-05	4.4867e-05	7.5657e-05	2.1582e-05	6.1407e-05	4.4426e-05	5.9097e-05
K01476	0.00011434	0.0001609	0.0001755	0.00013866	0.00013894	0.00014805	0.00012894	9.8901e-05	0.00011475	0.00015076	0.00018931	0.00013081	0.00015914	0.00014518	0.00018212	0.00011335	0.00015462	9.2695e-05	0.00014661	0.00017295
K01477	7.3375e-05	1.0586e-05	4.4173e-05	2.905e-05	8.7096e-05	0.00010201	8.4735e-05	0.00010008	3.4426e-05	4.9965e-05	3.3202e-05	9.7741e-05	3.2925e-05	0.00010349	4.6343e-05	7.8983e-05	9.2535e-05	8.1291e-05	6.3382e-05	3.9398e-05
K01478	0.00034713	0.00047061	0.00047582	0.00031955	0.00028173	0.00042347	0.00037916	0.00045006	0.00050463	0.00044452	0.00025251	0.00031566	0.00040435	0.00046689	0.00042535	0.00038189	0.00035447	0.00037809	0.00039273	0.00032069
K01479	0.00015117	0.00016272	0.00018143	0.00010033	0.00017775	0.00021596	0.00017745	0.00020958	0.00013798	0.00017718	0.00011417	0.00018928	0.0001343	0.00024305	0.00015674	0.00013358	0.0002238	0.00016989	0.00018037	0.00011385
K01480	0.00016532	0.00013852	0.00015623	0.00020425	0.000221	0.00013261	0.00015381	0.00015394	0.00011503	0.00016512	0.00025193	0.0001695	0.00019235	0.00020875	0.00014434	0.00019676	0.00019749	0.00018188	0.00019696	0.00024566
K01481	6.4829e-06	4.5368e-06	6.8186e-06	3.8932e-06	4.7399e-06	7.2861e-06	5.2192e-06	6.1813e-06	3.6385e-06	5.7431e-06	4.3686e-06	5.0199e-06	6.0652e-06	2.6612e-06	4.1325e-06	6.9283e-06	4.139e-06	4.971e-06	3.2579e-06	5.2145e-06
K01482	2.8289e-05	4.5368e-06	7.708e-06	1.5273e-05	4.1771e-05	4.8963e-05	1.9649e-05	5.0922e-05	5.3178e-06	2.4121e-05	1.6018e-05	3.9273e-05	1.4152e-05	3.4595e-05	5.9036e-06	3.8521e-05	5.8241e-05	2.6317e-05	2.3694e-05	1.1298e-05
K01483	6.7776e-05	3.2362e-05	3.5872e-05	6.4987e-05	9.4798e-05	6.3244e-05	4.7894e-05	8.6833e-05	5.5417e-05	4.7381e-05	7.5141e-05	7.8547e-05	5.1121e-05	6.8599e-05	5.4903e-05	9.2008e-05	7.4797e-05	7.8075e-05	6.5159e-05	6.0256e-05
K01484	0.00011375	6.3817e-05	7.8562e-05	6.888e-05	0.00015434	0.00015155	0.00011359	0.00015277	0.00012791	8.2701e-05	0.00011125	0.00017009	7.8559e-05	0.00013483	9.8885e-05	0.00015741	0.00015994	0.0001427	0.00012587	9.3281e-05
K01485	0.00010667	8.4989e-05	7.2929e-05	0.00013387	0.0001656	0.00013611	5.0964e-05	0.00014217	9.4042e-05	9.591e-05	0.00014417	0.00010247	9.7332e-05	0.00014489	8.7963e-05	0.00017847	0.00014043	0.00014387	0.00010633	0.00011646
K01486	0.00025372	0.00041254	0.00023361	0.00046389	0.00039489	0.00025472	0.00038868	0.00022959	0.00029052	0.00036469	0.00039405	0.00041341	0.00047482	0.00019959	0.00042801	0.00040489	0.00020015	0.00030674	0.00031957	0.0005003
K01487	0.00021571	0.00018298	0.00015416	0.00029649	0.00035846	0.00028649	0.00026403	0.0002811	0.00013211	0.00020359	0.00029008	0.00036852	0.00022903	0.00025429	0.00022256	0.00031593	0.00029416	0.00024621	0.00022302	0.00027608
K01488	0.00042169	0.00024771	0.00032729	0.00034051	0.00037653	0.00039083	0.00028552	0.00039943	0.00042291	0.000284	0.00034046	0.00034135	0.00028189	0.00034713	0.00031791	0.00036582	0.00027554	0.00046669	0.00030625	0.00024595
K01489	0.00021865	0.00031878	0.0002677	0.00030128	0.00026544	0.00020314	0.00020171	0.00024431	0.00027709	0.00027826	0.00031192	0.00024273	0.00030788	0.00025222	0.00027717	0.00021007	0.00022735	0.00021931	0.00028374	0.0002868
K01490	4.7149e-06	6.6539e-06	4.7434e-06	5.6901e-06	4.1474e-06	4.9546e-06	6.7543e-06	5.5926e-06	6.1575e-06	5.7431e-06	6.6986e-06	4.7246e-06	2.5994e-06	2.6612e-06	5.018e-06	5.8198e-06	5.9128e-06	3.509e-06	5.035e-06	5.7939e-06
K01491	0.00049094	0.00050509	0.00048946	0.00044323	0.00042363	0.0005077	0.00046144	0.0004739	0.00051807	0.00045945	0.00045492	0.00043201	0.00046904	0.00045062	0.00049118	0.00045561	0.00042631	0.0004778	0.0004801	0.00041426
K01492	9.4297e-05	0.00011281	7.6783e-05	0.00010931	8.8577e-05	6.1495e-05	0.00013294	8.0063e-05	4.87e-05	6.26e-05	6.6403e-05	8.209e-05	6.8739e-05	6.2685e-05	8.7077e-05	4.6004e-05	7.2432e-05	7.0472e-05	6.664e-05	7.561e-05
K01493	0.00017592	0.00021353	0.00021049	0.00019496	0.00015494	0.00018594	0.00019465	0.00017249	0.00020684	0.00018924	0.0001695	0.00018013	0.00022903	0.00018687	0.00020544	0.00015519	0.00014398	0.00017662	0.00019962	0.00015875
K01494	0.00019007	9.1643e-05	0.00011799	0.00015184	0.0001739	0.00012532	0.00014522	0.00015895	0.00012315	0.00015248	0.00017038	0.00014853	0.00011986	0.00013572	0.0001405	0.00018152	0.00014782	0.00017633	0.0001087	0.00017382
K01495	0.00024311	0.00029187	0.00024458	0.00026474	0.00024499	0.00031039	0.00022197	0.00028199	0.00027401	0.00025729	0.00025105	0.00028761	0.00027525	0.0002262	0.00023821	0.00025469	0.00027169	0.00023218	0.0002479	0.00025435
K01496	9.9602e-05	5.8978e-05	7.5004e-05	9.7331e-05	9.2132e-05	6.6741e-05	8.2279e-05	8.2123e-05	7.389e-05	0.00010252	8.2713e-05	9.656e-05	0.00011611	9.4028e-05	9.062e-05	0.00010476	7.5388e-05	7.3981e-05	8.7372e-05	0.00011472
K01497	0.00010137	5.7466e-05	8.1823e-05	5.3008e-05	9.0947e-05	0.00010346	9.2411e-05	8.6538e-05	0.0001016	7.782e-05	7.7471e-05	8.6815e-05	6.0652e-05	8.841e-05	8.7963e-05	0.00012138	0.00012033	0.0001079	6.9897e-05	9.502e-05
K01498	3.8308e-06	6.9564e-06	4.7434e-06	4.7917e-06	5.6286e-06	6.4118e-06	5.2192e-06	3.8265e-06	5.5977e-06	4.8817e-06	4.6599e-06	7.9728e-06	4.3323e-06	3.8439e-06	4.4277e-06	4.7113e-06	4.4346e-06	6.7255e-06	6.2197e-06	3.766e-06
K01499	6.4829e-06	6.9564e-06	4.7434e-06	6.2891e-06	4.1474e-06	5.246e-06	5.8332e-06	4.7096e-06	5.3178e-06	2.8716e-06	4.9511e-06	4.4293e-06	5.7764e-06	6.2094e-06	5.018e-06	5.5427e-06	3.8433e-06	3.2166e-06	5.9235e-06	6.0836e-06
K01500	4.7149e-06	3.9319e-06	3.854e-06	6.888e-06	5.6286e-06	4.6631e-06	5.2192e-06	3.8265e-06	4.1983e-06	5.456e-06	6.6986e-06	6.7917e-06	8.0869e-06	8.2792e-06	5.6084e-06	6.6512e-06	6.5041e-06	4.0938e-06	5.035e-06	6.0836e-06
K01501	6.8071e-05	9.376e-06	4.7434e-05	5.5703e-05	4.4733e-05	1.4281e-05	6.6315e-05	2.8552e-05	3.2187e-05	5.4273e-05	5.5919e-05	3.1005e-05	4.9388e-05	6.5346e-05	3.6307e-05	5.6258e-05	3.9911e-05	6.0237e-05	5.0054e-05	7.2713e-05
K01502	4.7149e-06	5.7466e-06	3.2611e-06	2.9948e-06	5.9249e-06	5.8289e-06	3.0701e-06	5.887e-06	4.1983e-06	4.3074e-06	3.2037e-06	6.4964e-06	6.6429e-06	3.2525e-06	6.4939e-06	5.5427e-06	3.5477e-06	5.2635e-06	5.3312e-06	4.3454e-06
K01503	2.6521e-06	5.4441e-06	4.7434e-06	4.7917e-06	4.1474e-06	5.5375e-06	6.4472e-06	5.887e-06	5.3178e-06	6.6046e-06	6.1161e-06	8.5634e-06	4.3323e-06	5.0266e-06	3.8373e-06	3.6027e-06	5.0259e-06	7.0179e-06	4.1465e-06	3.4763e-06
K01504	5.3042e-06	4.5368e-06	3.854e-06	3.8932e-06	4.7399e-06	3.7888e-06	4.9122e-06	4.7096e-06	6.9971e-06	7.7532e-06	5.8249e-06	7.0869e-06	3.7547e-06	5.3223e-06	7.6746e-06	6.3741e-06	4.139e-06	6.4331e-06	5.9235e-06	5.2145e-06
K01505	6.4829e-06	7.2588e-06	2.3717e-06	5.3906e-06	7.4061e-06	5.8289e-06	6.1402e-06	6.4757e-06	4.7581e-06	5.456e-06	5.5336e-06	6.7917e-06	4.6211e-06	5.0266e-06	4.1325e-06	5.5427e-06	5.0259e-06	3.8014e-06	5.9235e-06	5.2145e-06
K01506	3.8308e-06	6.3515e-06	6.8186e-06	5.0912e-06	5.9249e-06	6.1204e-06	6.1402e-06	5.5926e-06	4.4782e-06	6.3175e-06	6.4073e-06	5.9058e-06	5.1988e-06	6.8007e-06	6.4939e-06	4.9884e-06	5.0259e-06	5.2635e-06	6.5159e-06	4.9248e-06
K01507	0.00072963	0.00070743	0.00069816	0.00077116	0.00061263	0.00056016	0.00072209	0.00067023	0.00060819	0.000626	0.0005953	0.00068182	0.00070385	0.00054672	0.00073706	0.00060581	0.00046031	0.0006053	0.00054348	0.00069469
K01509	4.7149e-06	4.8392e-06	3.854e-06	4.1927e-06	8.2949e-06	4.3717e-06	5.5262e-06	4.7096e-06	6.1575e-06	4.8817e-06	5.5336e-06	3.8388e-06	5.7764e-06	5.0266e-06	4.7228e-06	3.6027e-06	6.2084e-06	6.7255e-06	5.9235e-06	6.0836e-06
K01510	6.1883e-06	3.9319e-06	3.5575e-06	5.0912e-06	3.5549e-06	4.0802e-06	6.7543e-06	5.5926e-06	3.3586e-06	6.0303e-06	7.5723e-06	5.6105e-06	4.6211e-06	6.2094e-06	4.7228e-06	3.3256e-06	6.2084e-06	7.0179e-06	4.7388e-06	3.1866e-06
K01511	6.1883e-06	3.6294e-06	5.9292e-06	4.1927e-06	4.4437e-06	3.2059e-06	4.9122e-06	5.2983e-06	7.8368e-06	5.456e-06	4.6599e-06	4.4293e-06	4.9099e-06	5.3223e-06	7.9698e-06	3.3256e-06	4.4346e-06	2.9241e-06	5.3312e-06	4.0557e-06
K01512	8.6636e-05	0.00011251	0.00010169	9.6732e-05	8.8281e-05	0.00011804	0.00011513	9.7135e-05	0.00011475	0.00010453	8.4169e-05	0.00010306	0.00012044	9.0184e-05	0.00010538	0.00010448	9.8448e-05	0.00010702	0.00010544	8.3721e-05
K01513	5.3042e-06	6.6539e-06	4.1504e-06	5.6901e-06	6.5174e-06	4.6631e-06	6.1402e-06	3.5322e-06	2.519e-06	5.7431e-06	2.0387e-06	7.9728e-06	5.7764e-06	5.3223e-06	4.4277e-06	4.7113e-06	6.5041e-06	4.6786e-06	5.035e-06	6.9526e-06
K01514	6.7776e-06	6.6539e-06	4.7434e-06	3.2943e-06	6.5174e-06	3.7888e-06	6.1402e-06	5.5926e-06	4.4782e-06	7.7532e-06	4.0774e-06	5.3152e-06	4.0435e-06	6.5051e-06	5.3132e-06	4.9884e-06	5.9128e-06	6.4331e-06	5.3312e-06	4.9248e-06
K01515	0.0002826	0.00031515	0.00031158	0.00028061	0.0002524	0.00030252	0.0003282	0.00027551	0.00031543	0.00029261	0.00028979	0.0003133	0.00031943	0.00026109	0.00029872	0.00025607	0.00025809	0.00029914	0.00028255	0.00030099
K01517	5.0096e-06	4.8392e-06	7.708e-06	3.8932e-06	6.5174e-06	5.8289e-06	4.6052e-06	5.887e-06	5.8776e-06	4.8817e-06	5.8249e-06	8.2681e-06	5.4876e-06	4.7309e-06	3.247e-06	4.157e-06	4.139e-06	2.9241e-06	7.1082e-06	4.0557e-06
K01518	6.4829e-06	8.4686e-06	5.0398e-06	6.2891e-06	6.2211e-06	6.1204e-06	8.2893e-06	4.4152e-06	3.6385e-06	5.7431e-06	5.2424e-06	5.0199e-06	4.3323e-06	3.5482e-06	3.247e-06	7.7597e-06	7.0954e-06	3.509e-06	5.3312e-06	4.3454e-06
K01519	8.5457e-06	6.049e-06	5.3363e-06	6.2891e-06	5.9249e-06	5.246e-06	4.2982e-06	3.5322e-06	4.1983e-06	6.3175e-06	6.1161e-06	6.7917e-06	2.8882e-06	5.3223e-06	3.8373e-06	5.2655e-06	5.9128e-06	4.3862e-06	5.3312e-06	4.3454e-06
K01520	0.0002493	0.00018843	0.00021612	0.00018208	0.00022337	0.00025356	0.00025728	0.00020457	0.00020852	0.00020446	0.0001829	0.00017511	0.00022846	0.00021821	0.00024057	0.00023833	0.00019601	0.00023276	0.00021739	0.00020279
K01521	4.7738e-05	6.6539e-05	5.2473e-05	3.3841e-05	5.1843e-05	5.0712e-05	1.8421e-05	2.6197e-05	8.7324e-05	5.255e-05	7.3685e-05	4.0455e-05	3.5525e-05	2.5429e-05	6.4939e-05	7.15e-05	6.0606e-05	4.3277e-05	2.7544e-05	6.663e-05
K01522	6.4829e-06	5.4441e-06	4.7434e-06	5.0912e-06	7.4061e-06	4.9546e-06	7.6753e-06	6.4757e-06	4.7581e-06	3.733e-06	5.8249e-06	6.4964e-06	5.1988e-06	5.3223e-06	4.1325e-06	3.6027e-06	4.139e-06	5.2635e-06	4.4426e-06	4.9248e-06
K01523	7.4849e-05	5.9583e-05	7.0261e-05	9.0742e-05	7.6431e-05	5.1003e-05	7.6446e-05	7.5942e-05	5.1219e-05	0.00010165	6.7277e-05	8.5339e-05	0.00010744	8.2496e-05	7.2319e-05	8.2309e-05	7.3023e-05	6.4331e-05	8.1152e-05	9.7337e-05
K01524	0.00060056	0.00058131	0.00056416	0.00060645	0.00057531	0.00043746	0.00054464	0.00052865	0.00057237	0.0005723	0.00069258	0.00057227	0.0005141	0.00053903	0.00058298	0.00056701	0.00058655	0.00061963	0.00049906	0.00066282
K01525	6.3945e-05	4.5973e-05	5.0398e-05	5.0013e-05	0.00010339	9.2097e-05	6.7543e-05	9.3603e-05	7.277e-05	5.3411e-05	7.019e-05	0.00010689	4.9966e-05	7.9539e-05	6.0807e-05	9.8659e-05	0.00010081	8.6262e-05	7.7598e-05	6.2574e-05
K01526	5.0096e-06	8.1662e-06	4.7434e-06	6.2891e-06	4.7399e-06	4.0802e-06	5.8332e-06	5.887e-06	5.8776e-06	3.4459e-06	6.4073e-06	6.2011e-06	5.7764e-06	6.5051e-06	7.6746e-06	3.8799e-06	3.252e-06	3.2166e-06	4.1465e-06	4.0557e-06
K01527	4.1255e-06	3.9319e-06	4.7434e-06	5.0912e-06	6.2211e-06	5.5375e-06	7.3683e-06	7.3587e-06	2.7989e-06	2.8716e-06	6.6986e-06	6.2011e-06	5.7764e-06	6.5051e-06	3.5421e-06	5.2655e-06	3.5477e-06	6.7255e-06	5.9235e-06	5.7939e-06
K01528	2.9468e-06	8.1662e-06	5.9292e-06	4.4922e-06	4.4437e-06	4.3717e-06	7.6753e-06	4.4152e-06	4.4782e-06	2.5844e-06	6.9898e-06	5.9058e-06	5.1988e-06	5.3223e-06	5.9036e-06	6.9283e-06	4.7302e-06	5.5559e-06	3.5541e-06	4.0557e-06
K01529	0.00032798	0.00044944	0.00035812	0.00049774	0.00025833	0.00046048	0.00030056	0.00040973	0.00045789	0.00052033	0.00032211	0.00047305	0.00059786	0.00032289	0.00033296	0.00051935	0.00026519	0.00035002	0.00044041	0.00046467
K01530	3.2415e-06	4.8392e-06	4.1504e-06	6.888e-06	4.4437e-06	5.8289e-06	5.8332e-06	5.5926e-06	3.3586e-06	6.3175e-06	4.3686e-06	3.5435e-06	2.3106e-06	5.0266e-06	7.6746e-06	3.8799e-06	2.3651e-06	4.971e-06	5.035e-06	3.1866e-06
K01531	0.00050685	0.00051326	0.00063857	0.00038932	0.00064344	0.00075105	0.00055784	0.00049921	0.00069244	0.00056082	0.00062763	0.00054215	0.00061403	0.00066115	0.00056792	0.00068313	0.00073289	0.00073601	0.00091311	0.00051739
K01533	0.001865	0.0015982	0.001777	0.0015549	0.0015799	0.0016709	0.0017432	0.0016707	0.0017552	0.0017301	0.0017058	0.0015718	0.0015628	0.0017005	0.0015957	0.0016068	0.0017189	0.0017776	0.0015656	0.0016542
K01534	0.00088433	0.0012881	0.0010936	0.0010712	0.00088844	0.00098858	0.00092196	0.00077443	0.0010065	0.0011894	0.0010659	0.00095762	0.0011772	0.0010009	0.00099062	0.00090041	0.0011048	0.0010582	0.0011823	0.0010047
K01535	6.7776e-06	3.0245e-06	4.7434e-06	5.6901e-06	5.0362e-06	3.4973e-06	5.8332e-06	5.2983e-06	6.7173e-06	5.1688e-06	2.9124e-06	4.7246e-06	3.7547e-06	5.618e-06	4.7228e-06	6.3741e-06	6.7997e-06	4.971e-06	3.8503e-06	4.0557e-06
K01536	4.7149e-06	4.2343e-06	5.6327e-06	5.6901e-06	6.5174e-06	4.0802e-06	4.6052e-06	6.1813e-06	5.3178e-06	3.1587e-06	5.2424e-06	6.2011e-06	6.6429e-06	2.9568e-06	5.9036e-06	3.8799e-06	7.0954e-06	5.5559e-06	4.1465e-06	6.0836e-06
K01537	0.00081656	0.00096422	0.00076605	0.00090353	0.00089407	0.00075718	0.00095112	0.00072439	0.00049512	0.0008698	0.0007249	0.00087937	0.0010958	0.00069427	0.00095933	0.00054484	0.00064213	0.00054623	0.00076206	0.00075089
K01538	6.7776e-06	4.8392e-06	5.6327e-06	3.5938e-06	6.2211e-06	4.3717e-06	7.9823e-06	3.5322e-06	2.7989e-06	4.0202e-06	6.1161e-06	6.2011e-06	6.354e-06	3.8439e-06	3.8373e-06	5.8198e-06	4.7302e-06	6.1407e-06	5.9235e-06	6.3733e-06
K01539	3.5362e-06	5.7466e-06	5.0398e-06	5.6901e-06	8.8873e-06	3.2059e-06	5.5262e-06	6.4757e-06	2.519e-06	4.8817e-06	5.5336e-06	4.4293e-06	5.7764e-06	4.1396e-06	6.4939e-06	4.4341e-06	5.0259e-06	6.7255e-06	5.035e-06	3.1866e-06
K01540	6.1883e-06	1.5123e-06	5.0398e-06	2.9948e-06	4.4437e-06	4.3717e-06	4.9122e-06	4.7096e-06	6.1575e-06	4.8817e-06	3.7862e-06	6.2011e-06	4.0435e-06	6.8007e-06	6.4939e-06	6.6512e-06	3.5477e-06	6.4331e-06	5.3312e-06	2.6072e-06
K01541	9.9896e-05	4.2646e-05	5.3659e-05	3.8932e-05	5.836e-05	0.00010929	7.7674e-05	0.0001251	0.00011307	5.7144e-05	2.4464e-05	4.1045e-05	4.159e-05	3.6961e-05	8.7668e-05	8.896e-05	2.4242e-05	1.813e-05	3.406e-05	4.0557e-05
K01542	3.8308e-06	4.8392e-06	5.0398e-06	5.3906e-06	6.8136e-06	5.246e-06	6.4472e-06	5.5926e-06	4.4782e-06	6.3175e-06	4.9511e-06	4.1341e-06	5.4876e-06	4.1396e-06	6.7891e-06	4.157e-06	3.8433e-06	5.2635e-06	5.9235e-06	3.4763e-06
K01543	5.5989e-06	5.7466e-06	6.2257e-06	7.1875e-06	5.6286e-06	5.8289e-06	6.4472e-06	5.5926e-06	4.1983e-06	5.456e-06	4.6599e-06	6.2011e-06	6.354e-06	5.618e-06	5.6084e-06	4.4341e-06	5.9128e-06	6.7255e-06	4.4426e-06	4.9248e-06
K01544	8.251e-06	4.2343e-06	8.3009e-06	5.6901e-06	5.0362e-06	4.3717e-06	6.7543e-06	3.2378e-06	4.1983e-06	5.7431e-06	3.4949e-06	6.4964e-06	4.3323e-06	6.2094e-06	5.3132e-06	5.5427e-06	5.3215e-06	5.5559e-06	3.2579e-06	4.6351e-06
K01545	1.1492e-05	1.2098e-05	1.3637e-05	1.1081e-05	2.0737e-05	1.807e-05	1.4737e-05	1.6189e-05	1.8193e-05	1.2635e-05	1.3106e-05	1.4764e-05	1.4441e-05	2.2176e-05	1.653e-05	1.6074e-05	2.8973e-05	1.3159e-05	1.392e-05	1.5064e-05
K01546	0.00041756	0.00046487	0.00051139	0.00050013	0.00049117	0.0004771	0.00047096	0.00050893	0.0004495	0.00040001	0.00051841	0.00049933	0.00046558	0.0005275	0.00048616	0.0004872	0.00049017	0.00040587	0.00052186	0.00053593
K01547	0.00049005	0.00057859	0.00058432	0.00062442	0.00057205	0.00056366	0.00057902	0.00056603	0.00054382	0.00049908	0.00060433	0.00061095	0.0005424	0.00063129	0.00059301	0.00058059	0.00056822	0.00050588	0.00060716	0.00061444
K01548	0.00014262	0.00018298	0.00018825	0.00018927	0.00018338	0.00016554	0.00018236	0.00017072	0.00016233	0.00014875	0.00019892	0.00017629	0.00015856	0.00018362	0.00019216	0.00016711	0.00017679	0.00015498	0.00017415	0.0002109
K01550	5.0096e-06	6.3515e-06	5.0398e-06	4.7917e-06	5.3324e-06	7.2861e-06	3.0701e-06	4.4152e-06	4.7581e-06	5.456e-06	5.2424e-06	6.2011e-06	3.7547e-06	7.0964e-06	6.1987e-06	4.7113e-06	4.7302e-06	6.1407e-06	5.6273e-06	4.9248e-06
K01551	0.00020893	0.00038321	0.00029112	0.00029948	0.00021804	0.00013144	0.00023179	0.0002031	0.00017913	0.00028429	0.00024668	0.00022619	0.00024203	0.00026612	0.00025415	8.12e-05	0.00029298	0.00019387	0.00027337	0.00022538
K01552	0.00060321	0.00022291	0.00040141	0.00047078	0.00056731	0.00056016	0.00053113	0.00060753	0.00027961	0.0003443	0.00041823	0.0004955	0.0004341	0.00046393	0.00049088	0.00051741	0.00040237	0.00050558	0.00043212	0.00040789
K01553	5.8936e-06	6.3515e-06	5.0398e-06	5.0912e-06	5.0362e-06	6.9947e-06	6.1402e-06	5.0039e-06	3.3586e-06	7.4661e-06	5.2424e-06	4.7246e-06	6.0652e-06	4.7309e-06	3.5421e-06	5.2655e-06	2.6608e-06	3.8014e-06	5.035e-06	5.2145e-06
K01554	1.9744e-05	8.2569e-05	4.3876e-05	6.8581e-05	3.2587e-05	4.2551e-05	4.6052e-05	2.8552e-05	4.7301e-05	5.1401e-05	6.553e-05	6.7326e-05	6.614e-05	2.3063e-05	4.3096e-05	5.1547e-05	4.9668e-05	3.7137e-05	4.7092e-05	7.9955e-05
K01555	9.5771e-05	1.1493e-05	4.5062e-05	3.8034e-05	0.00011228	0.00012911	0.00011175	0.00012951	4.1423e-05	5.5996e-05	4.6599e-05	0.00012491	3.6391e-05	0.00010645	5.9036e-05	9.6719e-05	0.00011353	9.9128e-05	8.056e-05	4.4903e-05
K01556	0.00013437	0.00013792	0.00013993	0.00019346	0.00020115	0.00022092	0.00019004	0.00020104	7.1371e-05	0.0001387	0.00025309	0.00023476	0.00017502	0.00022206	0.00016441	0.00016046	0.0002102	0.00016668	0.00019636	0.00019699
K01557	5.3042e-06	3.0245e-06	4.4469e-06	4.1927e-06	6.2211e-06	3.7888e-06	6.1402e-06	5.2983e-06	4.4782e-06	3.733e-06	4.6599e-06	5.6105e-06	4.3323e-06	5.9137e-06	5.018e-06	4.9884e-06	7.0954e-06	2.9241e-06	3.2579e-06	5.2145e-06
K01558	6.4829e-06	5.7466e-06	5.3363e-06	4.1927e-06	5.0362e-06	5.8289e-06	3.9912e-06	4.4152e-06	4.1983e-06	4.0202e-06	6.4073e-06	3.8388e-06	4.0435e-06	5.9137e-06	5.3132e-06	5.5427e-06	5.9128e-06	7.0179e-06	5.6273e-06	5.5042e-06
K01560	6.7482e-05	0.00012159	0.00011206	9.224e-05	0.00015494	9.5011e-05	7.399e-05	0.00011185	7.7808e-05	0.00013152	0.00011184	0.00012048	0.00013055	0.00012389	0.00010744	9.6719e-05	0.00014043	7.1641e-05	0.00013654	0.00011877
K01561	2.6226e-05	6.9564e-06	1.8084e-05	1.6172e-05	4.1178e-05	4.7214e-05	2.364e-05	5.7987e-05	6.9971e-06	2.5844e-05	1.398e-05	4.4884e-05	1.7907e-05	2.9864e-05	5.9036e-06	3.187e-05	5.5876e-05	3.0703e-05	2.4286e-05	2.0568e-05
K01562	5.5989e-06	4.8392e-06	5.6327e-06	4.1927e-06	5.9249e-06	6.1204e-06	6.1402e-06	3.2378e-06	1.9592e-06	6.0303e-06	4.6599e-06	5.6105e-06	5.4876e-06	6.8007e-06	7.0843e-06	5.5427e-06	5.0259e-06	5.2635e-06	5.3312e-06	7.8217e-06
K01563	5.8936e-06	4.2343e-06	6.8186e-06	4.1927e-06	4.4437e-06	3.4973e-06	7.0613e-06	4.7096e-06	3.0787e-06	3.733e-06	4.3686e-06	7.9728e-06	5.1988e-06	3.5482e-06	2.0662e-06	4.9884e-06	5.0259e-06	4.971e-06	4.1465e-06	4.6351e-06
K01564	5.1274e-05	4.8997e-05	4.6544e-05	1.4675e-05	2.8143e-05	5.7706e-05	2.7017e-05	2.1487e-05	3.7785e-05	5.255e-05	3.9027e-05	2.067e-05	2.1661e-05	1.2419e-05	4.6048e-05	5.0438e-05	5.1737e-05	3.275e-05	1.5105e-05	4.2006e-05
K01565	5.3042e-06	4.2343e-06	4.7434e-06	5.0912e-06	4.7399e-06	4.9546e-06	8.5963e-06	6.1813e-06	1.0076e-05	5.456e-06	4.0774e-06	6.4964e-06	5.1988e-06	6.5051e-06	5.6084e-06	4.157e-06	7.391e-06	3.2166e-06	5.6273e-06	5.5042e-06
K01567	8.251e-06	3.0548e-05	2.8757e-05	1.3177e-05	1.8367e-05	1.4281e-05	4.6052e-06	1.2657e-05	1.2875e-05	2.5557e-05	2.6503e-05	1.5946e-05	2.6571e-05	2.0107e-05	1.6235e-05	8.314e-06	2.4834e-05	6.1407e-06	2.6952e-05	2.2886e-05
K01568	4.7149e-06	4.2343e-06	3.5575e-06	2.9948e-06	7.4061e-06	5.5375e-06	3.9912e-06	2.3548e-06	3.9184e-06	4.3074e-06	4.0774e-06	6.2011e-06	5.4876e-06	3.8439e-06	6.1987e-06	4.7113e-06	6.7997e-06	5.2635e-06	5.9235e-06	4.9248e-06
K01569	5.8347e-05	6.3515e-06	2.2234e-05	3.9232e-05	2.2218e-05	3.5556e-05	1.443e-05	1.5306e-05	4.7581e-05	5.4273e-05	3.3784e-05	4.5179e-05	6.8739e-05	1.9219e-05	3.247e-05	1.4134e-05	3.1633e-05	1.3451e-05	4.798e-05	1.854e-05
K01571	0.00016561	6.6539e-05	0.00013252	0.00011021	0.00012709	0.00011396	6.8157e-05	0.00011774	0.00020907	0.00014903	0.00012756	9.715e-05	0.00015365	9.6097e-05	0.00017209	0.00014993	7.4206e-05	0.00012662	0.00015223	0.00011066
K01572	0.00017887	0.00015486	0.00016009	0.00012069	0.00012265	0.00016204	0.0001618	0.00010037	0.00017913	0.00011486	0.00014067	6.8212e-05	9.4733e-05	0.00015671	0.00014316	6.8175e-05	0.00017591	0.00015439	0.00018748	6.9526e-05
K01573	1.7091e-05	2.2079e-05	2.3124e-05	1.4675e-05	1.185e-05	1.4864e-05	2.1798e-05	1.7955e-05	1.2875e-05	1.1486e-05	1.7475e-05	7.9728e-06	6.6429e-06	2.2472e-05	1.1217e-05	6.9283e-06	1.8034e-05	1.6668e-05	1.8955e-05	1.2167e-05
K01574	3.0647e-05	3.9319e-05	1.1265e-05	3.9232e-05	4.6214e-05	1.1949e-05	4.728e-05	2.2959e-05	1.2595e-05	3.1587e-05	2.1261e-05	5.079e-05	4.6789e-05	9.7576e-06	4.7228e-05	2.1616e-05	7.391e-06	1.9007e-05	1.2439e-05	3.9978e-05
K01575	0.00013437	0.00021111	0.00018351	0.00014046	0.00011346	0.00018536	0.00015289	0.00014217	0.00020488	0.00020675	0.0001197	0.00012136	0.0002143	0.00017771	0.00018094	0.00014189	0.00014368	0.00011843	0.00019666	0.00011935
K01576	4.4497e-05	9.6784e-06	2.342e-05	2.4258e-05	8.206e-05	8.5102e-05	2.5175e-05	9.4486e-05	6.1575e-06	3.9915e-05	3.1454e-05	6.5554e-05	2.0795e-05	5.9728e-05	9.7409e-06	6.1524e-05	9.7561e-05	5.205e-05	4.1168e-05	2.5783e-05
K01577	0.00010343	9.6784e-05	0.00012362	7.6966e-05	0.00011761	0.00011833	0.00010316	5.3277e-05	0.00011559	5.1975e-05	0.00014125	9.0654e-05	9.7043e-05	0.00010083	0.00010804	8.3971e-05	0.00013097	0.0001272	0.00013594	7.9955e-05
K01578	6.7776e-06	7.2588e-06	5.9292e-06	5.6901e-06	5.3324e-06	4.6631e-06	4.9122e-06	5.887e-06	5.5977e-06	5.1688e-06	4.6599e-06	5.9058e-06	2.8882e-06	7.3921e-06	5.6084e-06	4.157e-06	6.2084e-06	4.3862e-06	4.1465e-06	3.766e-06
K01579	0.00013496	0.00018238	0.0001758	0.00015333	0.00012294	0.00013989	0.00017745	0.00014423	0.00014778	0.00016454	0.00013951	0.00014942	0.00014123	0.00013188	0.00013991	0.00011667	0.00017088	0.00015995	0.00013891	0.00016831
K01580	0.00014557	0.00044037	0.00028282	0.00036836	0.00020856	0.00023112	0.00020263	0.00024608	0.00032551	0.00036555	0.00030639	0.00027108	0.00035814	0.00020432	0.00020958	0.00027824	0.00031101	0.000212	0.00038532	0.00040789
K01581	0.00025843	0.00022412	0.00024399	0.0002297	0.00036053	0.00028474	0.00022964	0.00024372	0.00030703	0.00017201	0.00036988	0.00028141	0.0002403	0.00028977	0.00029459	0.00034808	0.0003388	0.0003468	0.00031187	0.00025145
K01582	0.00014233	0.00034842	0.00027126	0.0002297	0.00027669	0.0002215	8.5963e-05	0.00020281	0.00040304	0.00025098	0.00037279	0.00021202	0.00025734	0.0002327	0.00027038	0.00026189	0.00030333	0.00014124	0.00030091	0.00029665
K01583	4.7149e-06	6.6539e-06	6.8186e-06	5.6901e-06	4.7399e-06	6.1204e-06	7.0613e-06	4.1209e-06	5.3178e-06	3.4459e-06	4.6599e-06	8.2681e-06	5.7764e-06	7.9835e-06	8.265e-06	4.7113e-06	4.139e-06	6.1407e-06	5.3312e-06	5.2145e-06
K01584	8.5457e-05	9.8297e-05	8.7456e-05	9.7032e-05	0.00016442	0.00015272	5.4341e-05	0.00016189	0.0001573	9.6485e-05	0.00014824	0.00015444	8.9823e-05	0.00012567	8.9734e-05	0.00020009	0.00021848	0.00013393	0.00011492	0.0001208
K01585	0.00032621	0.00033512	0.00036939	0.00030846	0.00027817	0.0003611	0.00037916	0.00023077	0.00031431	0.00026189	0.00037075	0.00031419	0.00023972	0.00027558	0.00028101	0.000309	0.00044908	0.00032458	0.00028551	0.00040065
K01586	0.00074377	0.00078849	0.00081438	0.00069659	0.00065144	0.00066858	0.00078687	0.00068701	0.00084134	0.00073024	0.00066462	0.00064609	0.00067699	0.00067475	0.00076805	0.0006435	0.0006646	0.00068483	0.00071586	0.00069382
K01587	5.8936e-06	5.4441e-06	5.0398e-06	7.7865e-06	5.3324e-06	2.9145e-06	4.9122e-06	7.0644e-06	5.8776e-06	4.8817e-06	5.8249e-06	4.4293e-06	7.7981e-06	3.5482e-06	5.9036e-06	3.8799e-06	4.139e-06	4.3862e-06	5.6273e-06	5.2145e-06
K01588	0.00029085	0.00026525	0.00027185	0.00027343	0.00023937	0.00025822	0.00029166	0.00026845	0.0002866	0.00025959	0.00025367	0.00025188	0.00027611	0.00028267	0.00026477	0.00023695	0.00023474	0.00026288	0.0002636	0.00027492
K01589	0.0004821	0.00048906	0.00053541	0.00045132	0.00045355	0.00054384	0.00046973	0.00049686	0.00063338	0.00054904	0.00049074	0.00045888	0.00051988	0.00051272	0.00050682	0.0005127	0.00044878	0.00055003	0.00051001	0.00050407
K01590	4.0666e-05	8.1662e-06	3.0832e-05	1.6471e-05	5.0954e-05	4.9254e-05	7.4297e-05	4.3269e-05	2.9388e-05	2.2685e-05	2.9998e-05	5.1971e-05	2.2239e-05	4.6422e-05	4.3391e-05	4.9884e-05	3.0155e-05	4.6201e-05	3.791e-05	1.9409e-05
K01591	0.00044497	0.00047455	0.00048619	0.00045731	0.00037119	0.00047272	0.00052591	0.00040856	0.00045733	0.00042413	0.00047065	0.00047866	0.00044969	0.0004181	0.00045575	0.00039547	0.00042099	0.00045178	0.00041642	0.00043657
K01592	5.5989e-06	6.049e-06	8.0044e-06	3.8932e-06	7.1099e-06	5.246e-06	6.4472e-06	3.8265e-06	3.6385e-06	6.0303e-06	6.6986e-06	3.8388e-06	5.1988e-06	4.1396e-06	4.4277e-06	3.6027e-06	5.6172e-06	5.5559e-06	6.812e-06	3.1866e-06
K01593	4.7149e-06	3.6294e-06	6.5221e-06	3.8932e-06	3.8512e-06	3.7888e-06	6.4472e-06	3.8265e-06	5.8776e-06	3.4459e-06	5.2424e-06	8.2681e-06	5.7764e-06	3.8439e-06	6.4939e-06	3.8799e-06	6.2084e-06	4.0938e-06	6.2197e-06	4.9248e-06
K01594	6.7776e-06	5.7466e-06	5.0398e-06	5.9896e-06	3.8512e-06	5.246e-06	5.2192e-06	5.887e-06	5.5977e-06	3.733e-06	6.9898e-06	5.0199e-06	4.9099e-06	5.0266e-06	7.3794e-06	9.1454e-06	6.7997e-06	4.971e-06	3.2579e-06	5.7939e-06
K01595	0.00072756	0.00045882	0.00063087	0.00050552	0.00056612	0.00089241	0.00082218	0.00058634	0.00060455	0.00053009	0.00057841	0.00067533	0.00065678	0.00069042	0.00057766	0.00063657	0.00066519	0.00068103	0.00065929	0.00056867
K01596	0.00015736	6.9261e-05	0.00010258	0.00010512	0.00010606	0.00011075	0.00012434	0.00016748	0.00014498	9.1029e-05	0.00010863	0.00012963	3.2348e-05	8.3974e-05	7.3204e-05	7.2332e-05	6.6223e-05	0.00017896	6.0716e-05	6.1994e-05
K01597	0.0002216	0.00022684	0.00024132	0.0001734	0.00014131	0.000276	0.00023855	0.00017631	0.00024714	0.00022944	0.00013834	0.00015975	0.00026023	0.00019959	0.0002264	0.000189	0.00016526	0.00021902	0.00025056	0.00013992
K01598	7.2196e-05	5.3231e-05	6.2553e-05	4.2227e-05	5.1547e-05	9.1222e-05	4.6666e-05	4.945e-05	9.0683e-05	6.9205e-05	4.3395e-05	3.8092e-05	7.6248e-05	6.2685e-05	6.1397e-05	6.5403e-05	3.9911e-05	5.5559e-05	5.8643e-05	2.8969e-05
K01599	0.0004762	0.00048211	0.00047641	0.00048995	0.00040793	0.00038791	0.00048201	0.00046213	0.0004786	0.00045945	0.0004555	0.00049372	0.0004468	0.00043525	0.00047494	0.00042318	0.00045262	0.00050237	0.00043716	0.00051015
K01601	0.00010903	2.2079e-05	2.3124e-05	0.00013956	0.00013864	2.9727e-05	3.0087e-05	9.7135e-05	1.2875e-05	6.8056e-05	0.00012931	4.2817e-05	7.4227e-05	0.0001029	7.9698e-05	0.00012804	3.3703e-05	9.6497e-05	9.2407e-05	9.1253e-05
K01602	2.1217e-05	6.9564e-06	9.7832e-06	3.0846e-05	2.3996e-05	1.1366e-05	9.2104e-06	1.6778e-05	6.9971e-06	1.3784e-05	2.5338e-05	1.2402e-05	1.5019e-05	1.8924e-05	1.594e-05	2.5496e-05	1.153e-05	2.1639e-05	1.7771e-05	1.854e-05
K01607	9.2529e-05	0.00011977	0.00010821	0.00013207	0.00014575	0.00015825	0.00014368	0.00014335	5.2898e-05	0.00011142	0.00013659	0.00018397	0.00013863	0.00016203	0.00012958	0.00010642	0.00015817	0.00011697	0.00013091	0.0001405
K01608	6.925e-05	8.0755e-05	7.0261e-05	7.7865e-05	0.00013361	0.00013115	4.6052e-05	0.00013599	0.00012259	8.5286e-05	0.00012087	0.00012255	7.2205e-05	9.6097e-05	6.3168e-05	0.00014716	0.00017029	0.00010176	9.7738e-05	9.9944e-05
K01609	0.00037395	0.00031455	0.00032047	0.00034949	0.00027284	0.00029669	0.00037363	0.00035116	0.00031375	0.00034143	0.00029998	0.00032984	0.00033214	0.00032259	0.00030964	0.00028101	0.00030214	0.00030382	0.0003021	0.00033199
K01610	0.00051981	0.00054895	0.00059292	0.0005178	0.00047932	0.00048438	0.00052775	0.00041297	0.00043942	0.00041322	0.0005621	0.00044412	0.00044016	0.00057895	0.00050328	0.00028489	0.00062587	0.00051056	0.00063411	0.00041223
K01611	7.6027e-05	9.4667e-05	6.6407e-05	9.763e-05	0.00014605	0.00010463	7.4297e-05	0.00011509	6.5773e-05	9.7059e-05	9.7275e-05	0.00014056	0.00010657	0.00010201	7.4385e-05	0.00010836	0.00014634	7.5735e-05	9.2999e-05	0.00010603
K01612	5.5989e-06	4.2343e-06	5.0398e-06	7.487e-06	5.3324e-06	5.246e-06	5.8332e-06	5.0039e-06	4.4782e-06	4.5945e-06	4.6599e-06	3.8388e-06	4.0435e-06	4.4353e-06	7.0843e-06	4.7113e-06	3.8433e-06	3.2166e-06	5.9235e-06	4.0557e-06
K01613	0.00022101	0.00023168	0.00022561	0.00023449	0.00024648	0.00020693	0.00024868	0.00018544	0.00016737	0.00021393	0.00027056	0.00023712	0.00021257	0.0002262	0.00024027	0.00023251	0.00027968	0.00023188	0.00019577	0.00030099
K01615	4.7149e-06	5.1417e-06	5.0398e-06	5.3906e-06	6.5174e-06	8.1605e-06	5.8332e-06	2.9435e-06	4.1983e-06	6.3175e-06	4.3686e-06	3.8388e-06	4.0435e-06	3.2525e-06	8.5602e-06	5.2655e-06	5.6172e-06	6.4331e-06	3.8503e-06	6.663e-06
K01616	5.0096e-06	4.5368e-06	7.115e-06	5.3906e-06	5.6286e-06	6.1204e-06	6.7543e-06	5.887e-06	2.7989e-06	4.8817e-06	4.6599e-06	5.6105e-06	7.5093e-06	5.3223e-06	6.4939e-06	4.157e-06	5.6172e-06	1.4621e-06	6.5159e-06	7.2423e-06
K01617	7.9563e-06	4.1738e-05	3.9429e-05	2.1862e-05	2.4292e-05	2.2733e-05	6.4472e-06	1.9133e-05	1.6793e-05	3.4746e-05	3.4367e-05	2.3623e-05	4.1301e-05	4.1987e-05	2.5976e-05	5.2655e-06	4.8189e-05	7.8952e-06	3.3172e-05	3.1577e-05
K01618	5.8936e-06	7.2588e-06	6.5221e-06	5.6901e-06	5.3324e-06	3.4973e-06	4.6052e-06	6.4757e-06	5.0379e-06	4.5945e-06	5.5336e-06	5.9058e-06	4.9099e-06	4.7309e-06	8.5602e-06	4.7113e-06	5.9128e-06	6.1407e-06	4.7388e-06	6.0836e-06
K01619	0.00034713	0.00041527	0.00040081	0.00041478	0.00034305	0.00030893	0.00038407	0.00036941	0.00041591	0.00036842	0.00037279	0.00032423	0.00042225	0.00034299	0.00042358	0.00035168	0.00027731	0.00033131	0.0003483	0.00036994
K01620	0.00033417	0.00036808	0.00032788	0.00040849	0.00035697	0.00034157	0.00031653	0.00039619	0.00029416	0.0003064	0.00037075	0.00032689	0.00029893	0.00037197	0.0002937	0.00031094	0.00033555	0.00039973	0.00026448	0.00031113
K01621	0.00011787	2.8733e-05	0.00011028	4.2826e-05	6.7248e-05	0.00010609	0.00012219	4.1797e-05	1.8193e-05	1.8091e-05	8.7664e-05	6.4078e-05	6.1519e-05	9.521e-05	8.2945e-05	1.9676e-05	9.7266e-05	0.0001272	0.0001238	2.0279e-05
K01622	2.9468e-06	5.7466e-06	5.9292e-06	7.1875e-06	6.2211e-06	4.0802e-06	6.7543e-06	4.4152e-06	5.0379e-06	6.3175e-06	3.7862e-06	5.3152e-06	4.0435e-06	5.9137e-06	5.3132e-06	4.9884e-06	3.8433e-06	7.0179e-06	4.4426e-06	3.4763e-06
K01623	0.00026492	0.00031999	0.00027185	0.00029319	0.00023729	0.00015039	0.00026741	0.00023842	0.00027485	0.00018924	0.00023387	0.00018751	0.00017445	0.0002469	0.00028042	0.00020508	0.00021493	0.00023627	0.00019814	0.00022451
K01624	0.00070222	0.00068475	0.00064243	0.00075319	0.00059575	0.00060154	0.00066499	0.00068789	0.00066781	0.00069894	0.00063666	0.00064019	0.00067468	0.00061384	0.00062342	0.00068646	0.00057354	0.00069507	0.00064714	0.00067325
K01625	0.00038367	0.00031092	0.000327	0.00032284	0.00037327	0.00036402	0.00036841	0.00037912	0.00037981	0.00037474	0.00029911	0.00033279	0.00035034	0.00033708	0.00037488	0.00046448	0.0002711	0.00039154	0.00031128	0.00035777
K01626	0.00078267	0.00049814	0.00055349	0.00063639	0.00078475	0.00088308	0.00062968	0.0008904	0.00070307	0.00071129	0.00065879	0.00086963	0.0006458	0.00061975	0.00063463	0.00087713	0.0007595	0.00071583	0.00054941	0.00067933
K01627	0.00020215	0.00013096	0.00017046	0.00014165	0.00018486	0.00018303	0.00018605	0.00016954	0.0001503	0.00015277	0.00018902	0.00015001	0.00010686	0.00018539	0.00016589	0.00020508	0.00022853	0.00020118	0.00015993	0.00016976
K01628	0.00017858	0.00014336	0.0001343	0.00015244	0.00020204	0.00014397	0.00013877	0.00017131	0.00014554	0.00017718	0.00019805	0.00015266	0.00015019	0.00014341	0.00020308	0.00020868	0.00013038	0.00014094	0.00013831	0.00016715
K01629	0.00010432	0.0001733	0.00013222	0.00014285	0.00013805	0.00011221	0.00013969	9.0365e-05	0.00015981	0.00012175	0.00012378	0.00010542	0.00013632	7.7174e-05	0.00013106	0.00014882	0.00011264	0.00013685	0.00014661	0.00015557
K01630	1.1787e-05	3.8411e-05	2.4606e-05	2.9649e-05	3.7031e-05	1.3115e-05	1.1052e-05	1.6483e-05	5.6537e-05	2.6131e-05	4.4269e-05	2.569e-05	2.0506e-05	2.0994e-05	3.247e-05	4.1293e-05	3.3703e-05	2.9241e-05	2.636e-05	3.6501e-05
K01631	3.7424e-05	3.3572e-05	2.7274e-05	5.1511e-05	5.5398e-05	2.0984e-05	1.3202e-05	3.2673e-05	3.7785e-05	3.1587e-05	5.621e-05	2.7757e-05	3.8702e-05	4.4944e-05	4.5457e-05	5.7921e-05	3.0747e-05	4.0938e-05	3.9984e-05	5.2145e-05
K01632	6.7776e-06	4.8392e-06	5.6327e-06	7.487e-06	2.9624e-06	4.6631e-06	5.5262e-06	7.3587e-06	3.3586e-06	5.7431e-06	4.0774e-06	4.4293e-06	4.0435e-06	7.0964e-06	4.7228e-06	6.6512e-06	6.7997e-06	4.971e-06	4.4426e-06	4.3454e-06
K01633	0.00019744	0.00017784	0.00019833	0.00019646	0.00017686	0.00017195	0.00016026	0.0001613	0.00018472	0.00019441	0.00018348	0.00015798	0.00017762	0.00019633	0.00017534	0.00019122	0.00018891	0.00019796	0.00019251	0.00017787
K01634	4.4202e-06	5.1417e-06	4.4469e-06	5.6901e-06	4.4437e-06	6.1204e-06	6.1402e-06	4.4152e-06	6.9971e-06	5.7431e-06	3.7862e-06	3.5435e-06	5.1988e-06	5.9137e-06	4.7228e-06	4.7113e-06	5.3215e-06	5.8483e-06	5.9235e-06	4.0557e-06
K01635	0.00029321	0.00023984	0.00029527	0.00018867	0.00020382	0.00032962	0.00027692	0.00020575	0.0003521	0.00033253	0.00020096	0.00022029	0.00034485	0.00026523	0.00029282	0.00024083	0.00022321	0.00027341	0.00034445	0.00016426
K01636	0.00011581	0.00017875	0.00011769	0.00012608	8.6503e-05	0.00019993	6.5701e-05	0.00015718	9.5441e-05	0.00011946	9.4945e-05	6.4373e-05	0.00017791	0.00019338	0.00010154	0.00015519	5.1737e-05	0.00014475	7.6413e-05	5.0407e-05
K01637	0.00014262	0.00018994	0.00018025	0.00019137	0.00025003	0.00026318	0.00021215	0.00021605	0.0001517	0.00015679	0.0002461	0.0002755	0.0001886	0.00022561	0.00018596	0.00019178	0.00029505	0.00019299	0.00023013	0.00021698
K01638	0.00030529	0.00038411	0.00033678	0.00045521	0.00050569	0.00042551	0.00035583	0.00038	0.00037253	0.000313	0.00057608	0.00052237	0.00039857	0.0004314	0.00039938	0.00044452	0.00049342	0.00041786	0.00045374	0.00049769
K01639	0.00014528	0.00019054	0.00018232	0.00010931	0.00013805	0.00021567	0.00017899	0.00018485	0.00023287	0.00011257	0.00011067	9.0063e-05	0.0001343	0.00017327	0.00017534	0.0001782	0.00013156	0.00011053	0.00012884	0.0001153
K01640	9.6655e-05	5.7163e-05	8.0341e-05	0.00010332	0.00013657	0.00011833	7.1534e-05	0.00013599	4.842e-05	9.1603e-05	0.00012116	0.0001128	8.8379e-05	0.00014784	8.4126e-05	0.00010531	0.00013452	0.00010264	0.00012854	9.0384e-05
K01641	0.00026993	0.00026888	0.00030802	0.00019466	0.00018515	0.00033662	0.00029197	0.00021046	0.00034958	0.00029146	0.00017795	0.00017481	0.00032492	0.0002741	0.00029872	0.00023279	0.0002241	0.00028803	0.00032402	0.00016657
K01643	0.00012052	0.00010616	0.00012096	8.7448e-05	0.00014101	0.00012037	6.1709e-05	4.6801e-05	0.00025526	0.00013123	0.00015261	0.00010069	0.00017098	9.3732e-05	0.000147	0.00013192	0.00012476	0.00012895	0.00018274	0.00011617
K01644	0.00014734	0.00015818	0.00016009	0.00019197	0.0001733	0.00019119	0.00015504	0.00013658	0.00020963	0.00015104	0.00022222	0.00020139	0.00019466	0.00013158	0.00018596	0.00017265	0.00015876	0.00017428	0.00016823	0.00020481
K01645	5.8936e-06	4.5368e-06	3.854e-06	7.487e-06	4.7399e-06	4.9546e-06	5.8332e-06	5.887e-06	5.3178e-06	5.1688e-06	4.6599e-06	5.6105e-06	4.6211e-06	2.6612e-06	5.9036e-06	2.7713e-06	5.0259e-06	4.0938e-06	5.3312e-06	4.3454e-06
K01646	3.0352e-05	2.9035e-05	2.1345e-05	2.6055e-05	3.0513e-05	3.0602e-05	1.1973e-05	1.825e-05	5.4578e-05	3.331e-05	3.0581e-05	2.8643e-05	3.8991e-05	2.5429e-05	3.5717e-05	3.1316e-05	3.1633e-05	3.6844e-05	4.3834e-05	2.4045e-05
K01647	0.00058022	0.00056347	0.00061278	0.00056362	0.00048021	0.00047068	0.00052929	0.00053306	0.00059448	0.00057058	0.00059763	0.0005519	0.00055367	0.00058013	0.0005815	0.00052766	0.00057029	0.00051172	0.00058139	0.0006185
K01648	5.5989e-06	5.1417e-06	5.0398e-06	5.0912e-06	6.5174e-06	5.8289e-06	5.5262e-06	7.3587e-06	6.4374e-06	5.7431e-06	4.6599e-06	4.4293e-06	4.3323e-06	4.1396e-06	3.8373e-06	4.157e-06	4.139e-06	7.0179e-06	5.6273e-06	3.4763e-06
K01649	0.00091557	0.00074373	0.00073463	0.00098319	0.00090325	0.00072395	0.0008799	0.0009375	0.00076213	0.00090225	0.00083907	0.0009278	0.00088119	0.00078977	0.00082355	0.00087075	0.00074442	0.00082958	0.00079612	0.00090587
K01652	0.0012904	0.0015207	0.0013243	0.0014941	0.0014359	0.0013587	0.0014083	0.0014476	0.0012735	0.0015739	0.0013426	0.0015072	0.0016391	0.0014169	0.0013867	0.0013003	0.001422	0.0012413	0.0014305	0.0013955
K01653	0.0002325	0.00024166	0.00021464	0.00026774	0.00024262	0.00019585	0.000245	0.00023636	0.00022839	0.00023777	0.00024668	0.00025424	0.00023481	0.00020314	0.00022197	0.00021256	0.00021789	0.00020089	0.00020703	0.00026159
K01654	0.00017887	0.00018601	0.00017432	0.00014135	9.4798e-05	0.00014572	0.00020386	0.00010803	0.00011559	0.00017115	0.00012436	0.00010424	0.00013921	0.00013069	0.00014788	0.00013192	0.00013008	0.00015059	8.9741e-05	0.00016368
K01655	0.00011198	0.00014306	7.0261e-05	0.00022072	0.00015671	6.9655e-05	0.00017715	9.1837e-05	2.7149e-05	0.00012118	0.00015669	0.00019135	0.00019178	7.5104e-05	0.00017445	0.00012277	4.9372e-05	8.2461e-05	8.2929e-05	0.00019438
K01656	4.7149e-06	5.4441e-06	5.9292e-06	4.4922e-06	2.37e-06	5.8289e-06	5.2192e-06	5.5926e-06	2.519e-06	4.3074e-06	5.2424e-06	7.6775e-06	4.9099e-06	6.8007e-06	3.8373e-06	4.7113e-06	5.0259e-06	4.3862e-06	6.5159e-06	3.4763e-06
K01657	0.00071165	0.00064483	0.00064332	0.00065107	0.00062537	0.00070909	0.00071933	0.00069319	0.00065689	0.0007288	0.00063345	0.00067739	0.00065273	0.00064163	0.00062666	0.00063436	0.00075181	0.00065442	0.00063619	0.00067962
K01658	0.00025372	0.00023682	0.00024784	0.00024827	0.00020944	0.00029349	0.00028951	0.00025314	0.00021719	0.00027826	0.00022367	0.00026369	0.00026629	0.00027203	0.00022286	0.00023473	0.0002578	0.00024709	0.00024523	0.0002558
K01659	9.9896e-05	6.2003e-05	8.7752e-05	7.2774e-05	9.2132e-05	9.2971e-05	9.7937e-05	9.5663e-05	0.00011195	9.7346e-05	9.2907e-05	0.00011073	8.0003e-05	0.0001026	6.0216e-05	0.00013801	0.00014191	0.00010615	8.5595e-05	0.00012515
K01661	0.00019302	0.00030638	0.00027245	0.0002297	0.00018041	0.00017428	0.00017377	0.00022959	0.00034454	0.00024207	0.00023299	0.00018101	0.00019553	0.0002052	0.00023378	0.00018596	0.00021079	0.00025235	0.00026893	0.00022277
K01662	0.00088227	0.00080029	0.00085825	0.00094366	0.00079542	0.00070442	0.00083968	0.00083654	0.00070923	0.00072794	0.00090577	0.00077691	0.0006871	0.00075015	0.00077956	0.00080008	0.00080828	0.00092344	0.00078694	0.00091833
K01663	5.3042e-06	6.049e-06	4.7434e-06	7.1875e-06	5.3324e-06	6.1204e-06	6.7543e-06	5.0039e-06	4.7581e-06	5.456e-06	5.2424e-06	6.4964e-06	4.3323e-06	4.4353e-06	3.247e-06	5.8198e-06	4.4346e-06	4.971e-06	5.035e-06	4.9248e-06
K01664	0.00010844	0.000173	0.00012214	0.00013147	0.00010428	6.2661e-05	9.3025e-05	0.00010302	0.00015142	0.00013238	0.00010805	9.213e-05	0.00011351	8.7818e-05	0.00011984	7.344e-05	9.9039e-05	0.00010498	9.5665e-05	0.00010342
K01665	0.00028171	0.00035115	0.00031128	0.00033452	0.0003709	0.00028649	0.00031991	0.00033144	0.00030144	0.00030065	0.00030814	0.00032629	0.00029777	0.00037079	0.00034536	0.00027436	0.00036216	0.00031318	0.0003329	0.00028477
K01666	0.00014616	0.00025194	0.00022086	0.00016441	0.00015257	0.00013844	0.00016487	0.00012863	0.00016681	9.6198e-05	0.00019426	8.652e-05	8.2025e-05	0.00018924	0.0001411	6.7343e-05	0.00022587	0.00014591	0.00019903	0.00011704
K01667	9.4887e-05	8.2267e-05	0.00010258	0.00010332	9.5095e-05	4.5757e-05	2.7938e-05	9.7429e-05	0.000185	7.3799e-05	0.00010689	8.3567e-05	7.4227e-05	6.6233e-05	0.00011837	0.00014134	5.4989e-05	9.9421e-05	6.042e-05	0.00012341
K01668	6.4829e-06	3.6294e-06	6.2257e-06	5.9896e-06	2.9624e-06	4.9546e-06	3.6841e-06	4.4152e-06	6.7173e-06	6.6046e-06	4.3686e-06	4.4293e-06	5.4876e-06	6.5051e-06	5.9036e-06	4.7113e-06	3.5477e-06	5.8483e-06	5.3312e-06	4.6351e-06
K01669	0.00039959	0.00041315	0.00040141	0.00043874	0.00045533	0.00034886	0.00034201	0.00043976	0.00049988	0.00046749	0.00044764	0.00036911	0.00038326	0.00047812	0.00040557	0.00045782	0.00042809	0.00049681	0.00049609	0.00037515
K01671	1.5618e-05	3.8714e-05	2.6385e-05	3.3242e-05	3.7031e-05	1.8653e-05	1.0745e-05	1.825e-05	6.1015e-05	2.6418e-05	4.5143e-05	2.2737e-05	2.9748e-05	1.9219e-05	3.5126e-05	4.6835e-05	3.7251e-05	2.544e-05	2.7544e-05	3.9398e-05
K01672	7.367e-06	5.1417e-06	5.9292e-06	3.8932e-06	4.7399e-06	5.8289e-06	6.7543e-06	4.7096e-06	5.5977e-06	5.1688e-06	4.9511e-06	7.9728e-06	6.6429e-06	5.3223e-06	5.018e-06	3.0485e-06	6.7997e-06	6.7255e-06	4.7388e-06	6.3733e-06
K01673	0.00036599	0.00025497	0.00030002	0.00027492	0.00039815	0.0004395	0.00038714	0.00037529	0.00029248	0.00030439	0.00034221	0.00041961	0.00028564	0.00038321	0.00034004	0.00035806	0.00037842	0.00036347	0.00033497	0.0003175
K01674	9.4003e-05	7.1076e-05	8.8345e-05	6.5886e-05	5.2732e-05	0.00010259	6.0174e-05	4.5624e-05	0.00010608	0.00012664	7.5723e-05	7.4413e-05	0.00011639	4.9675e-05	8.8849e-05	9.6997e-05	7.4501e-05	7.1349e-05	0.00011166	7.9376e-05
K01676	0.00029998	0.00032332	0.00035486	0.00026354	0.0003395	0.00028911	0.00030855	0.00027257	0.00037505	0.00027653	0.00035736	0.00029824	0.00025387	0.00037759	0.00027894	0.00029764	0.0004408	0.0003354	0.00036755	0.00033575
K01677	3.0647e-05	4.0831e-05	1.3044e-05	4.3724e-05	4.651e-05	1.6321e-05	4.8508e-05	2.8257e-05	1.0636e-05	3.4459e-05	2.2717e-05	5.1085e-05	4.7366e-05	7.3921e-06	4.8114e-05	2.7713e-05	7.6866e-06	1.4621e-05	1.629e-05	4.4033e-05
K01678	2.0628e-05	2.3894e-05	1.3044e-05	3.0547e-05	2.7255e-05	9.0348e-06	3.3771e-05	2.1782e-05	1.1475e-05	2.9003e-05	1.6018e-05	3.3958e-05	3.3792e-05	9.1662e-06	3.8963e-05	2.1616e-05	7.391e-06	9.9421e-06	1.2736e-05	3.6791e-05
K01679	0.00060144	0.0005311	0.00065488	0.0005747	0.00048821	0.00056511	0.00057503	0.00059812	0.00054914	0.00057345	0.00057812	0.00062099	0.00052507	0.00059285	0.0005263	0.00053487	0.00064923	0.00060559	0.00056036	0.00059851
K01681	0.0011979	0.0010955	0.0011606	0.0012297	0.0011571	0.001143	0.0013189	0.001213	0.0011965	0.0012049	0.0011763	0.0013613	0.0012151	0.0012466	0.0012052	0.0012446	0.0012529	0.0012413	0.001286	0.0012854
K01682	0.00038574	0.00021595	0.0003436	0.00018598	0.0003078	0.00036052	0.00033618	0.00028934	0.00038064	0.00035292	0.00031513	0.00034313	0.0002117	0.00033383	0.00030433	0.00043926	0.00045558	0.00037341	0.00027574	0.00037197
K01684	1.9449e-05	5.5046e-05	3.2907e-05	4.4623e-05	4.7695e-05	2.5064e-05	9.8244e-06	1.7661e-05	8.0047e-05	3.2162e-05	6.5238e-05	3.071e-05	3.2059e-05	2.7203e-05	3.8078e-05	5.9584e-05	4.8781e-05	4.0061e-05	4.2057e-05	4.9538e-05
K01685	0.00021187	0.00020809	0.00014052	0.00024078	0.00025477	9.8217e-05	0.00016302	0.00015512	0.00015758	0.00014415	0.00022338	0.00014469	0.00015105	0.00013601	0.00020751	0.00018125	0.00014693	0.0001775	0.0001629	0.00020771
K01686	0.00034625	0.00040075	0.0003101	0.00041059	0.00038541	0.00023432	0.00034324	0.00031907	0.00031095	0.00028773	0.00031775	0.0003012	0.00031972	0.00027765	0.00039318	0.00035612	0.0002371	0.00034651	0.00027781	0.00035806
K01687	0.0011976	0.00088649	0.00090895	0.0011027	0.0010369	0.00088629	0.0013539	0.00097105	0.00092278	0.0010763	0.00094246	0.0011504	0.0010591	0.00098966	0.001075	0.00098493	0.00088633	0.0010281	0.00096109	0.0011246
K01689	0.00085162	0.00073677	0.00086151	0.00072265	0.00069084	0.00077874	0.0008584	0.00069201	0.00079739	0.00074833	0.00071762	0.00069747	0.0007723	0.00072709	0.00076274	0.00072027	0.00071663	0.00081496	0.00076561	0.00071323
K01690	0.00031	0.00014669	0.00025733	0.00013806	0.00024973	0.00029582	0.00026771	0.00023342	0.00029304	0.00026189	0.00024756	0.00026281	0.00015394	0.00025163	0.00023555	0.00032896	0.00033644	0.00029885	0.00023042	0.00028969
K01691	5.3042e-06	3.9319e-06	4.4469e-06	5.9896e-06	6.2211e-06	6.1204e-06	6.7543e-06	3.8265e-06	6.1575e-06	3.733e-06	4.9511e-06	5.9058e-06	3.177e-06	5.3223e-06	6.1987e-06	4.9884e-06	3.8433e-06	4.6786e-06	4.1465e-06	4.6351e-06
K01692	0.00092647	0.00051477	0.00060389	0.00081998	0.0011986	0.0012876	0.00095112	0.0012857	0.00051975	0.00079026	0.00088014	0.0013226	0.00077664	0.0011458	0.00077337	0.0010958	0.0011852	0.00098894	0.00095428	0.0007842
K01693	0.00020244	0.00017603	0.00020723	0.0002327	0.00017449	0.0001705	0.00025789	0.00018691	0.00017409	0.00023145	0.00019572	0.00023859	0.00026283	0.00018865	0.00022138	0.00019288	0.0001969	0.00019153	0.00019251	0.00023784
K01694	4.4202e-06	4.8392e-06	4.1504e-06	3.5938e-06	3.8512e-06	7.5776e-06	7.3683e-06	6.1813e-06	5.8776e-06	4.8817e-06	4.3686e-06	4.1341e-06	6.0652e-06	5.3223e-06	4.4277e-06	3.3256e-06	5.3215e-06	5.2635e-06	4.4426e-06	4.0557e-06
K01695	0.00040872	0.00035145	0.00037057	0.00037016	0.00032942	0.00035877	0.00039727	0.0003591	0.00038036	0.00039771	0.00035415	0.0003697	0.00036074	0.00032023	0.00036868	0.00033173	0.00037103	0.00035791	0.00032816	0.00038384
K01696	0.00067541	0.00057466	0.00058669	0.00067113	0.00054479	0.00055258	0.00062661	0.00059076	0.00060175	0.00064093	0.00063171	0.00059826	0.00058111	0.0005547	0.00059862	0.00058586	0.00053688	0.00058512	0.00053637	0.00062835
K01697	0.00014027	4.7787e-05	0.00010554	0.0001144	0.00012383	0.00011308	5.5876e-05	0.00020339	0.00014582	0.0001028	8.4752e-05	0.00013938	8.7512e-05	0.00011532	0.00010833	0.00018402	9.1057e-05	0.00011404	7.4044e-05	0.00011848
K01698	0.00040518	0.0003944	0.0004023	0.00041298	0.00038216	0.00032788	0.00041047	0.00039825	0.00040248	0.00042356	0.00039784	0.00042994	0.00039511	0.00036251	0.00040794	0.00038688	0.00036689	0.00040675	0.0003249	0.00045018
K01699	1.9154e-05	7.531e-05	3.0535e-05	7.3073e-05	1.1554e-05	4.3717e-05	4.5438e-05	5.2983e-05	3.8904e-05	8.7583e-05	2.3591e-05	6.4078e-05	9.2711e-05	1.1236e-05	1.9777e-05	6.1246e-05	3.7546e-05	2.8949e-05	6.5159e-05	7.9086e-05
K01702	5.8936e-06	4.2343e-06	7.708e-06	2.9948e-06	5.3324e-06	4.9546e-06	5.8332e-06	8.2417e-06	5.3178e-06	7.4661e-06	3.2037e-06	5.3152e-06	6.0652e-06	6.2094e-06	7.3794e-06	5.2655e-06	2.9564e-06	6.7255e-06	2.9618e-06	7.2423e-06
K01703	0.00056932	0.00062003	0.00059292	0.00069569	0.00051784	0.000494	0.00065977	0.0005466	0.00056537	0.00061968	0.00062705	0.00064403	0.00059872	0.00055263	0.00057678	0.00047445	0.0005694	0.00059389	0.00057606	0.00063762
K01704	0.00028142	0.00027765	0.00027778	0.00031116	0.00025151	0.00026755	0.00031622	0.00027816	0.00027821	0.00028055	0.00029357	0.00030828	0.0002738	0.00025843	0.00026979	0.00024027	0.0002643	0.00027955	0.00025323	0.00032591
K01705	3.5362e-06	3.9319e-06	4.1504e-06	5.0912e-06	5.6286e-06	6.4118e-06	3.3771e-06	3.8265e-06	6.4374e-06	4.8817e-06	7.2811e-06	5.3152e-06	5.1988e-06	3.8439e-06	6.4939e-06	4.7113e-06	2.3651e-06	4.971e-06	5.035e-06	6.3733e-06
K01706	7.7795e-05	6.5632e-05	7.3226e-05	6.6485e-05	0.0001105	9.7926e-05	0.00010162	7.7414e-05	0.00013546	5.1401e-05	9.844e-05	0.00010453	5.4876e-05	9.1662e-05	9.5342e-05	0.00011972	8.8692e-05	0.00010702	7.434e-05	7.9955e-05
K01707	8.1626e-05	1.2098e-05	3.765e-05	6.1094e-05	9.2132e-05	6.2952e-05	8.2279e-05	6.9466e-05	3.5546e-05	4.5084e-05	7.4267e-05	6.083e-05	4.5345e-05	7.8061e-05	7.1138e-05	8.3417e-05	3.8433e-05	8.3046e-05	6.0716e-05	4.7799e-05
K01708	8.3689e-05	7.1076e-05	8.123e-05	7.487e-05	0.00010961	9.9091e-05	0.00010162	7.447e-05	0.00014078	5.4273e-05	0.00010922	0.0001063	6.7584e-05	8.8705e-05	0.00011984	0.00011695	9.017e-05	0.00010264	8.5299e-05	8.6908e-05
K01709	5.8936e-05	0.00011039	0.00010258	6.888e-05	5.7768e-05	5.5958e-05	5.7718e-05	6.299e-05	5.01e-05	6.8918e-05	8.0383e-05	4.2226e-05	4.4189e-05	8.2792e-05	5.9331e-05	1.0531e-05	0.0001088	5.1465e-05	0.000101	6.1125e-05
K01710	0.00070075	0.0006412	0.00061545	0.00073492	0.00065352	0.00050449	0.00067328	0.0004945	0.00051443	0.00058925	0.00069316	0.0005581	0.00065158	0.00059787	0.00057501	0.00057173	0.00057265	0.00064536	0.00063411	0.00066398
K01711	0.00017622	0.00016756	0.00013637	0.00014195	0.00017686	0.00015505	0.00011083	0.00014717	0.00014134	0.00013037	0.00019106	0.00011191	7.827e-05	0.00014134	0.00013696	0.0001818	0.00018773	0.00015878	0.0001472	0.00014948
K01712	0.00041402	0.00037564	0.00045447	0.00047138	0.00046214	0.00040657	0.00041692	0.00045565	0.00031907	0.00032506	0.00045434	0.00041872	0.00034254	0.00051597	0.00043391	0.00038688	0.0004405	0.00040148	0.00043775	0.00041977
K01713	2.3574e-05	7.8637e-06	1.0376e-05	1.8268e-05	3.5549e-05	5.5083e-05	1.75e-05	5.2983e-05	4.1983e-06	2.7854e-05	1.6601e-05	4.1045e-05	1.5019e-05	3.6073e-05	6.4939e-06	3.963e-05	5.6172e-05	2.6902e-05	2.4879e-05	2.1148e-05
K01714	0.00097097	0.00076157	0.00074145	0.00088137	0.0010161	0.00080993	0.00084981	0.00099666	0.00087073	0.00084596	0.00083296	0.00089355	0.00077173	0.00084388	0.00086959	0.00095528	0.00082158	0.0009135	0.00079079	0.00083924
K01715	7.8974e-05	0.00014064	5.7513e-05	0.00016651	0.00013687	5.9746e-05	0.00017377	7.1821e-05	2.491e-05	9.8495e-05	0.00010252	0.00018633	0.00016289	3.1934e-05	0.00015143	8.7297e-05	3.5181e-05	5.9652e-05	4.5611e-05	0.00016426
K01716	4.0371e-05	2.9035e-05	2.7274e-05	4.6419e-05	6.8729e-05	4.1094e-05	2.6096e-05	5.0039e-05	4.6461e-05	3.7043e-05	6.4947e-05	4.8132e-05	3.9279e-05	5.411e-05	3.7783e-05	7.0946e-05	5.6172e-05	5.4681e-05	5.1831e-05	4.6061e-05
K01718	4.1255e-06	5.1417e-06	4.7434e-06	5.0912e-06	6.2211e-06	6.1204e-06	7.9823e-06	4.4152e-06	5.5977e-06	3.4459e-06	4.6599e-06	7.0869e-06	5.4876e-06	6.2094e-06	5.018e-06	4.157e-06	4.7302e-06	3.509e-06	5.035e-06	4.3454e-06
K01719	0.00027788	0.00027039	0.0002849	0.00025366	0.00023166	0.00021771	0.00027171	0.0002502	0.00024742	0.00028486	0.00028717	0.00024775	0.00024694	0.00027499	0.00024647	0.00026078	0.00028086	0.00027195	0.00025975	0.00030244
K01720	6.3061e-05	0.00013429	0.00012451	0.00010602	0.00015345	0.00011949	3.592e-05	0.00014011	0.00012539	0.00012175	0.00016106	0.00013554	0.00012275	0.00015523	8.8849e-05	0.00011695	0.00019956	9.2695e-05	0.00016142	0.00013355
K01721	6.7776e-06	5.1417e-06	5.3363e-06	5.3906e-06	4.7399e-06	2.623e-06	6.4472e-06	5.2983e-06	3.6385e-06	4.3074e-06	4.0774e-06	4.7246e-06	4.0435e-06	3.5482e-06	3.5421e-06	5.8198e-06	5.9128e-06	5.5559e-06	5.9235e-06	3.4763e-06
K01722	5.3042e-06	6.3515e-06	5.3363e-06	6.5886e-06	6.2211e-06	3.7888e-06	4.9122e-06	4.7096e-06	7.277e-06	6.6046e-06	6.1161e-06	5.6105e-06	6.354e-06	4.7309e-06	4.1325e-06	5.5427e-06	4.139e-06	4.6786e-06	4.4426e-06	4.3454e-06
K01723	6.1883e-06	6.6539e-06	5.6327e-06	7.1875e-06	5.3324e-06	4.3717e-06	5.8332e-06	6.77e-06	4.1983e-06	4.5945e-06	4.6599e-06	4.1341e-06	5.4876e-06	4.7309e-06	5.6084e-06	3.8799e-06	3.5477e-06	5.5559e-06	6.2197e-06	2.8969e-06
K01724	2.4164e-05	2.2986e-05	2.8164e-05	2.8151e-05	3.9697e-05	2.827e-05	1.1052e-05	3.8265e-05	1.3435e-05	2.6993e-05	2.8542e-05	3.2482e-05	2.5416e-05	4.3761e-05	2.2729e-05	3.0485e-05	4.0798e-05	2.8364e-05	2.8729e-05	2.4334e-05
K01725	2.4753e-05	2.964e-05	2.3124e-05	2.4557e-05	4.2067e-05	3.0019e-05	1.2587e-05	4.062e-05	3.7225e-05	2.0962e-05	3.6988e-05	4.075e-05	2.7149e-05	2.9568e-05	2.509e-05	4.2124e-05	5.2328e-05	3.2458e-05	2.9025e-05	2.81e-05
K01726	5.5989e-06	5.1417e-06	3.5575e-06	5.9896e-06	5.0362e-06	4.9546e-06	5.5262e-06	5.5926e-06	2.519e-06	4.5945e-06	5.8249e-06	5.6105e-06	2.5994e-06	6.2094e-06	5.3132e-06	5.5427e-06	5.9128e-06	5.8483e-06	5.035e-06	6.0836e-06
K01727	0.00029792	0.00034419	0.00039311	0.00022581	0.00023285	0.00044183	0.00031592	0.00046772	0.00042795	0.00026993	0.00016543	0.00019578	0.00032434	0.00037138	0.00038226	0.00042097	0.00012299	0.00023013	0.00016438	0.00022625
K01728	6.7776e-06	6.049e-06	4.1504e-06	4.7917e-06	5.9249e-06	6.4118e-06	6.4472e-06	7.0644e-06	5.0379e-06	3.1587e-06	4.9511e-06	5.9058e-06	4.6211e-06	5.3223e-06	4.1325e-06	6.3741e-06	3.5477e-06	6.4331e-06	4.7388e-06	5.5042e-06
K01729	2.7995e-05	7.2588e-06	1.0376e-05	2.276e-05	4.7103e-05	6.645e-05	2.3947e-05	6.2402e-05	6.7173e-06	2.929e-05	2.0387e-05	4.9904e-05	1.7329e-05	4.7605e-05	6.4939e-06	4.7667e-05	6.918e-05	2.9534e-05	3.5837e-05	2.2596e-05
K01730	5.8347e-05	7.0471e-05	6.3442e-05	5.2409e-05	4.0882e-05	4.0219e-05	6.5701e-05	4.5624e-05	4.0304e-05	1.4932e-05	3.7862e-05	1.8013e-05	6.9317e-06	5.0562e-05	4.4867e-05	9.1454e-06	7.391e-05	5.7313e-05	5.2423e-05	2.2596e-05
K01731	4.4202e-06	6.3515e-06	3.5575e-06	6.888e-06	3.5549e-06	5.5375e-06	7.9823e-06	6.1813e-06	3.3586e-06	3.733e-06	6.1161e-06	6.7917e-06	6.6429e-06	6.5051e-06	3.5421e-06	4.9884e-06	6.5041e-06	5.2635e-06	3.5541e-06	4.9248e-06
K01732	5.3042e-06	5.1417e-06	6.2257e-06	7.1875e-06	6.5174e-06	6.1204e-06	6.1402e-06	7.3587e-06	6.1575e-06	6.6046e-06	5.8249e-06	5.3152e-06	6.9317e-06	4.7309e-06	5.9036e-06	6.3741e-06	3.8433e-06	5.8483e-06	5.3312e-06	5.2145e-06
K01733	0.00078503	0.00073133	0.00078176	0.00067503	0.00065648	0.00074493	0.00075249	0.00072056	0.00075121	0.00072708	0.00071122	0.00069777	0.00071425	0.00068096	0.00074591	0.00066567	0.00066844	0.00074712	0.00067498	0.00066803
K01734	6.3061e-05	0.00012763	9.4274e-05	9.8229e-05	8.9762e-05	7.2861e-05	7.8902e-05	5.887e-05	9.6841e-05	8.988e-05	8.6208e-05	7.3527e-05	8.9245e-05	8.1609e-05	8.3831e-05	7.2332e-05	9.1944e-05	7.3981e-05	0.00011255	0.00010487
K01735	0.00059201	0.00058282	0.0005864	0.00055014	0.00050599	0.00054005	0.00056459	0.00056132	0.00061771	0.00056225	0.00052133	0.00050613	0.00055251	0.00051508	0.00057146	0.00056701	0.00048455	0.00057956	0.00051386	0.00054173
K01736	0.00061559	0.0006787	0.00067889	0.0006361	0.00056227	0.00060708	0.00061894	0.00062372	0.00070979	0.00067625	0.00061481	0.000577	0.00064551	0.00062774	0.0006181	0.00059002	0.00058566	0.00059389	0.00063233	0.00063298
K01737	0.00015264	0.00014911	0.00016424	0.00012638	0.00014575	0.00013057	0.00016087	0.00011597	0.00015002	0.00015995	0.00014242	0.0001441	0.00013343	0.00015139	0.00015999	0.00013219	0.00016497	0.00011755	0.00013328	0.00013934
K01738	0.0007476	0.0008021	0.00079926	0.00078344	0.00080223	0.00076534	0.00076999	0.00077973	0.00073806	0.00085487	0.00072316	0.00076391	0.00080234	0.00079894	0.0007958	0.00077736	0.00076719	0.00073104	0.00078842	0.00072945
K01739	0.00040695	0.00043432	0.00036613	0.0004004	0.00028676	0.00024394	0.00039512	0.00035145	0.00043466	0.00049736	0.00033464	0.00033102	0.00043207	0.00032969	0.00039023	0.00030097	0.00031456	0.00037341	0.000356	0.00037544
K01740	0.00052983	0.00060944	0.00043283	0.00075828	0.00061471	0.00045844	0.00067665	0.00052306	0.00031291	0.00052119	0.00061831	0.00068212	0.00060219	0.00043347	0.00053781	0.00041459	0.00048248	0.00050529	0.00052719	0.00060749
K01741	6.1883e-06	5.1417e-06	3.2611e-06	5.3906e-06	5.9249e-06	6.1204e-06	9.2104e-06	6.1813e-06	5.5977e-06	6.3175e-06	6.1161e-06	5.3152e-06	3.7547e-06	4.7309e-06	5.6084e-06	6.0969e-06	2.9564e-06	4.6786e-06	4.1465e-06	5.5042e-06
K01743	6.1883e-06	7.2588e-06	6.8186e-06	5.6901e-06	2.6662e-06	4.3717e-06	5.2192e-06	5.5926e-06	5.3178e-06	4.0202e-06	4.6599e-06	6.2011e-06	6.9317e-06	4.1396e-06	4.7228e-06	3.8799e-06	5.9128e-06	3.509e-06	5.035e-06	5.5042e-06
K01744	0.00056814	0.00057919	0.00055764	0.0005762	0.00058005	0.00043076	0.00055324	0.00053542	0.00050547	0.00056513	0.00053763	0.00060269	0.00050312	0.00043584	0.00057353	0.00048471	0.00049963	0.00046932	0.00044012	0.00062921
K01745	0.00048917	0.00039954	0.000536	0.00047438	0.00054272	0.00055666	0.00057626	0.00059458	0.00036273	0.00035004	0.00043978	0.00052414	0.00034283	0.00060881	0.00045605	0.00042235	0.00057384	0.00047839	0.00051535	0.00041397
K01746	7.0723e-06	5.7466e-06	4.7434e-06	5.3906e-06	3.5549e-06	4.3717e-06	5.5262e-06	7.3587e-06	5.3178e-06	4.8817e-06	5.2424e-06	3.2482e-06	6.0652e-06	5.618e-06	5.6084e-06	5.8198e-06	4.4346e-06	2.6317e-06	5.6273e-06	4.0557e-06
K01749	0.00038603	0.00038684	0.0003848	0.00038603	0.00030898	0.00028124	0.00039789	0.00035469	0.00038009	0.00039599	0.00036755	0.00039835	0.00035669	0.0003291	0.00036838	0.00036831	0.0003119	0.00037692	0.0003178	0.00042701
K01750	0.00021187	0.00019206	0.0002345	0.00019766	0.00023492	0.00022908	0.00018114	0.00027433	0.00023622	0.00024408	0.00019106	0.00021202	0.00020968	0.00030426	0.00022581	0.00022448	0.00024449	0.00023803	0.00024316	0.00018453
K01751	0.00013791	0.00014124	0.00013963	0.00012099	0.00017923	0.0001262	0.00016609	7.8297e-05	0.00016989	0.00010625	0.00014999	0.00014115	0.00015538	0.00010231	0.00018862	0.00015409	0.00012683	0.00017282	0.00016704	0.00013529
K01752	0.00086901	0.0010305	0.00098069	0.00091821	0.00094591	0.0009437	0.00090783	0.00092102	0.0011509	0.00095422	0.00093431	0.00088351	0.00094184	0.00086044	0.00098471	0.0010115	0.00085617	0.00098017	0.00088645	0.00097801
K01753	9.9307e-05	0.00012824	0.00013637	0.00010991	0.00019434	0.00016438	0.00011145	0.00016984	0.00013602	0.0001275	0.00017038	0.0001943	0.0001265	0.0001851	0.0001287	0.00015492	0.00022291	0.00014358	0.00018244	0.00015383
K01754	0.00074849	0.00072165	0.00074767	0.00070258	0.00079749	0.00087259	0.000867	0.00084684	0.00076269	0.00076815	0.00069811	0.00088853	0.00071685	0.00084507	0.00069013	0.00073108	0.00089549	0.00074332	0.00078516	0.00073582
K01755	0.00061824	0.00064089	0.00061604	0.00074391	0.00059397	0.00055608	0.00061126	0.00060224	0.00053962	0.00066678	0.00066869	0.00060682	0.00069923	0.00068599	0.00062637	0.00061136	0.00057265	0.00058337	0.00063885	0.0006944
K01756	0.00087608	0.00074615	0.00081971	0.00073912	0.00076046	0.00091018	0.00082617	0.0008695	0.00081139	0.0008072	0.00077209	0.00078104	0.00077028	0.00081905	0.00077278	0.00080757	0.00086889	0.00088163	0.0007825	0.00074509
K01757	3.8308e-06	6.9564e-06	6.5221e-06	5.3906e-06	5.0362e-06	2.9145e-06	4.9122e-06	3.8265e-06	4.4782e-06	6.6046e-06	4.6599e-06	5.0199e-06	6.9317e-06	7.3921e-06	3.8373e-06	6.0969e-06	5.9128e-06	4.6786e-06	5.3312e-06	5.7939e-06
K01758	2.8289e-05	9.376e-06	1.8381e-05	2.0964e-05	4.4733e-05	5.9746e-05	2.0877e-05	6.5051e-05	8.3966e-06	3.1874e-05	2.097e-05	5.4924e-05	2.195e-05	5.2336e-05	7.0843e-06	4.0184e-05	7.7162e-05	3.5675e-05	3.5837e-05	2.4914e-05
K01759	0.00023191	0.00025436	0.00022738	0.00027762	0.00029654	0.00026114	0.00022105	0.00027993	0.0001948	0.00028314	0.00026183	0.00026074	0.0003047	0.0002806	0.00024765	0.0002666	0.00028588	0.00022019	0.00029588	0.00026217
K01760	0.00030912	0.00047061	0.00040348	0.00034201	0.00036675	0.00029174	0.00037517	0.00027168	0.00040555	0.00044682	0.00034046	0.00039835	0.0004263	0.00033087	0.00045251	0.00032868	0.0003527	0.00028891	0.00040073	0.00041687
K01761	1.6207e-05	0.00011826	9.0124e-05	9.224e-05	6.0434e-05	7.4319e-05	7.6139e-05	3.6794e-05	3.4706e-05	6.662e-05	0.00011999	9.8036e-05	0.00010109	7.0669e-05	8.265e-05	1.5242e-05	8.9875e-05	3.4212e-05	8.6187e-05	0.00011414
K01762	6.4829e-06	3.9319e-06	4.7434e-06	4.4922e-06	5.6286e-06	6.7032e-06	5.5262e-06	5.887e-06	3.0787e-06	6.3175e-06	6.6986e-06	3.5435e-06	6.354e-06	4.7309e-06	4.4277e-06	5.5427e-06	3.8433e-06	5.5559e-06	7.1082e-06	4.0557e-06
K01763	4.7149e-06	3.9319e-06	3.2611e-06	5.9896e-06	7.4061e-06	2.3316e-06	5.2192e-06	4.7096e-06	2.519e-06	4.3074e-06	5.2424e-06	5.3152e-06	5.1988e-06	3.8439e-06	6.7891e-06	4.9884e-06	7.391e-06	4.6786e-06	2.6656e-06	3.766e-06
K01764	1.0019e-05	4.5368e-06	7.4115e-06	5.3906e-06	5.9249e-06	4.0802e-06	8.5963e-06	5.887e-06	6.4374e-06	6.8918e-06	6.9898e-06	5.9058e-06	4.0435e-06	6.2094e-06	7.0843e-06	6.6512e-06	8.2779e-06	4.0938e-06	4.7388e-06	1.7382e-06
K01766	5.1274e-05	6.0793e-05	5.0398e-05	5.78e-05	9.2428e-05	9.0057e-05	3.0394e-05	8.9187e-05	8.6205e-05	5.456e-05	7.8927e-05	8.3862e-05	5.0832e-05	7.2443e-05	4.7524e-05	0.00011002	0.00011471	7.9537e-05	6.2789e-05	7.7638e-05
K01767	4.7149e-06	5.7466e-06	5.0398e-06	5.3906e-06	6.5174e-06	5.8289e-06	5.2192e-06	5.2983e-06	5.0379e-06	5.456e-06	4.9511e-06	5.9058e-06	3.4658e-06	4.1396e-06	3.5421e-06	6.0969e-06	4.7302e-06	4.0938e-06	3.8503e-06	3.1866e-06
K01768	5.0096e-05	3.9621e-05	3.0832e-05	3.9531e-05	2.3403e-05	1.2532e-05	1.4123e-05	6.3874e-05	5.6537e-05	3.0726e-05	4.0483e-05	2.3033e-05	8.6646e-06	7.3921e-06	7.6746e-06	7.4826e-06	1.626e-05	6.1407e-05	6.812e-06	2.1727e-05
K01769	7.367e-06	5.1417e-06	5.3363e-06	6.5886e-06	5.3324e-06	5.8289e-06	7.9823e-06	6.77e-06	4.4782e-06	5.1688e-06	4.9511e-06	5.3152e-06	3.4658e-06	4.4353e-06	4.4277e-06	4.7113e-06	6.2084e-06	4.0938e-06	3.8503e-06	2.8969e-06
K01770	0.00018801	0.00018268	0.00018054	0.00021353	0.00019345	0.00015884	0.00018451	0.00017573	0.00017885	0.00017775	0.00018873	0.00018721	0.0001808	0.00017505	0.00017091	0.00018291	0.00017502	0.00020586	0.00017652	0.00022509
K01771	3.713e-05	0.00013126	0.00012185	8.5352e-05	6.8729e-05	8.5102e-05	9.6709e-05	7.5353e-05	8.0887e-05	0.00011314	7.4267e-05	7.8842e-05	0.00014123	9.9646e-05	8.6192e-05	7.1223e-05	0.00010288	3.2458e-05	0.0001315	0.00011356
K01772	0.0006427	0.00055409	0.00061753	0.00058189	0.00049651	0.00047535	0.00043012	0.00062696	0.00074142	0.000653	0.00060083	0.00052384	0.00048088	0.00046777	0.00053132	0.00050743	0.00049727	0.0005591	0.00044574	0.00056056
K01774	6.7776e-06	3.9319e-06	6.8186e-06	5.0912e-06	5.0362e-06	4.3717e-06	5.2192e-06	5.5926e-06	5.0379e-06	6.3175e-06	3.4949e-06	4.1341e-06	3.4658e-06	6.5051e-06	6.4939e-06	3.0485e-06	4.139e-06	4.971e-06	4.4426e-06	5.5042e-06
K01775	0.00096124	0.00095877	0.0009715	0.00084393	0.00087866	0.00091193	0.0010263	0.00090718	0.00099807	0.00091402	0.00085276	0.00092101	0.00088234	0.00096393	0.00096818	0.00081727	0.00093629	0.00093777	0.00092051	0.00081838
K01776	0.00056107	0.00054441	0.00057484	0.0005205	0.00050095	0.00053626	0.00062692	0.00051599	0.00053178	0.00053641	0.00049657	0.00056637	0.00057244	0.00050799	0.00055759	0.00048554	0.00049106	0.00054389	0.00053845	0.00051739
K01777	9.3413e-05	0.00011523	0.00012125	0.00011111	0.00014605	9.5011e-05	7.5832e-05	0.00011038	6.8012e-05	0.00012893	0.00016543	0.00011546	0.00012679	0.00016292	0.00012279	8.4803e-05	0.00014043	8.3338e-05	0.0001626	0.00011675
K01778	0.00033711	0.00031697	0.00034241	0.00032763	0.0003232	0.00027279	0.00030149	0.00030995	0.00035965	0.0003489	0.00032619	0.00027108	0.00028766	0.00029657	0.00031112	0.00034309	0.0003054	0.00035558	0.00031572	0.00034734
K01779	0.00014528	0.00018329	0.00020604	0.00014615	0.0001739	0.00015796	0.00012373	0.0001251	9.6001e-05	0.00019527	0.00020183	0.00018308	0.00021719	0.0002123	0.00018065	6.8452e-05	0.00021257	9.8251e-05	0.00025945	0.00014745
K01780	5.0096e-06	4.2343e-06	3.5575e-06	6.888e-06	4.1474e-06	2.9145e-06	7.0613e-06	4.4152e-06	7.5569e-06	5.456e-06	4.0774e-06	5.3152e-06	4.3323e-06	4.7309e-06	8.265e-06	5.2655e-06	3.8433e-06	5.2635e-06	5.035e-06	6.3733e-06
K01781	3.8308e-06	6.3515e-06	6.5221e-06	5.0912e-06	5.0362e-06	4.6631e-06	5.5262e-06	3.5322e-06	5.3178e-06	5.1688e-06	4.3686e-06	6.4964e-06	6.0652e-06	6.8007e-06	7.0843e-06	4.9884e-06	4.139e-06	5.2635e-06	5.035e-06	6.663e-06
K01782	0.00022867	0.00011312	0.00012333	0.00021982	0.00032587	0.00025239	0.00014675	0.00026786	0.000185	0.00018292	0.00027755	0.00025543	0.00016492	0.00026109	0.00019068	0.00033727	0.00025307	0.00026873	0.00023042	0.00021206
K01783	0.00043848	0.00056226	0.00046277	0.00058458	0.00039312	0.00049691	0.0005649	0.00048744	0.00045761	0.00057029	0.00045026	0.00055426	0.00062501	0.00039237	0.00051007	0.00051159	0.00041922	0.00045178	0.0005032	0.00059358
K01784	0.0010582	0.00091976	0.001147	0.00093887	0.0010185	0.0011419	0.0010211	0.00092484	0.0010538	0.0010631	0.0011003	0.00087908	0.0011215	0.0011378	0.0011049	0.00099269	0.0010421	0.0009676	0.0012202	0.00097945
K01785	0.00062177	0.00059976	0.00065607	0.00050971	0.00053324	0.00052256	0.00068249	0.0004945	0.00065353	0.00049075	0.00049773	0.0004075	0.00044507	0.0006029	0.00061515	0.00047722	0.00055048	0.00059711	0.00066195	0.00046786
K01786	0.00015883	0.00015153	0.00014467	0.00015962	0.00016205	0.00017108	0.0001139	0.00019015	0.00025861	0.0001565	0.00013863	0.00014587	0.00019062	0.00012153	0.00019216	0.00023251	7.6571e-05	0.00015001	0.00012143	0.00016339
K01787	5.7168e-05	6.6842e-05	6.4628e-05	5.181e-05	3.9993e-05	4.2551e-05	6.5394e-05	4.3269e-05	3.5546e-05	1.3784e-05	4.1648e-05	1.9784e-05	7.5093e-06	5.6476e-05	2.8927e-05	1.0808e-05	6.1789e-05	4.5032e-05	5.6866e-05	2.4045e-05
K01788	0.0002104	0.00022109	0.00024399	0.00016561	0.00018219	0.00026259	0.00018114	0.00023371	0.00029108	0.00018522	0.00017067	0.00013347	0.00021344	0.00018746	0.00022315	0.00025524	0.00013215	0.00021463	0.000194	0.00015643
K01789	4.155e-05	9.6784e-06	1.5712e-05	6.0794e-05	5.0362e-05	1.7195e-05	1.5351e-05	3.6794e-05	1.3714e-05	3.13e-05	5.0968e-05	1.9194e-05	3.3792e-05	4.7605e-05	2.6861e-05	5.2378e-05	1.2713e-05	4.3862e-05	3.0506e-05	4.4033e-05
K01790	0.00033387	0.00032665	0.00029379	0.00035908	0.00031165	0.00026405	0.00030026	0.00030318	0.00027037	0.00028859	0.00032357	0.00026074	0.00028564	0.00028386	0.00024913	0.00024831	0.00027879	0.00033891	0.0002941	0.00028825
K01791	0.00077265	0.00077791	0.00083928	0.00066365	0.00059604	0.00077554	0.00092073	0.00062431	0.00076297	0.00058781	0.00059734	0.00059235	0.00063049	0.00071881	0.00078252	0.00054568	0.00063297	0.00066787	0.00073896	0.0005649
K01792	7.7795e-05	8.1359e-05	5.3956e-05	7.2175e-05	9.4502e-05	8.7725e-05	3.1929e-05	0.00012451	0.00012147	7.4948e-05	9.1159e-05	8.1205e-05	4.6789e-05	6.2389e-05	3.8963e-05	8.702e-05	8.8101e-05	0.00010732	6.3085e-05	7.0975e-05
K01793	6.7776e-06	5.7466e-06	4.7434e-06	5.6901e-06	6.5174e-06	5.8289e-06	7.3683e-06	5.2983e-06	5.0379e-06	6.3175e-06	3.7862e-06	4.1341e-06	5.7764e-06	5.0266e-06	6.1987e-06	4.7113e-06	5.0259e-06	3.2166e-06	5.035e-06	6.663e-06
K01794	4.1255e-06	6.6539e-06	5.6327e-06	5.9896e-06	7.7024e-06	4.9546e-06	5.5262e-06	7.0644e-06	3.9184e-06	4.8817e-06	4.6599e-06	4.1341e-06	4.9099e-06	6.8007e-06	4.4277e-06	6.6512e-06	5.6172e-06	3.8014e-06	4.1465e-06	7.8217e-06
K01795	1.2966e-05	6.5632e-05	6.3146e-05	3.1445e-05	3.4661e-05	2.2733e-05	5.8332e-06	2.5608e-05	2.0991e-05	5.1688e-05	5.4754e-05	3.1891e-05	5.1699e-05	4.5831e-05	3.1289e-05	7.7597e-06	5.9719e-05	8.48e-06	6.6047e-05	4.5192e-05
K01796	5.3042e-06	6.049e-06	7.115e-06	5.9896e-06	4.1474e-06	4.3717e-06	3.0701e-06	3.2378e-06	4.7581e-06	4.3074e-06	6.4073e-06	8.8587e-06	3.177e-06	5.3223e-06	4.7228e-06	5.8198e-06	4.7302e-06	7.3104e-06	4.1465e-06	5.2145e-06
K01797	8.6046e-05	1.2401e-05	2.8164e-05	7.4271e-05	9.1836e-05	5.246e-05	6.2937e-05	6.5345e-05	2.6029e-05	4.0489e-05	8.2713e-05	6.0239e-05	4.6211e-05	8.5157e-05	7.0843e-05	7.926e-05	3.6955e-05	8.2461e-05	6.042e-05	5.9387e-05
K01798	6.4829e-06	3.6294e-06	5.3363e-06	5.6901e-06	5.9249e-06	6.4118e-06	4.2982e-06	6.4757e-06	3.6385e-06	6.3175e-06	3.7862e-06	4.7246e-06	4.6211e-06	5.618e-06	5.9036e-06	4.4341e-06	3.252e-06	5.5559e-06	4.7388e-06	4.0557e-06
K01799	6.4829e-06	5.1417e-06	6.2257e-06	6.888e-06	9.1836e-06	3.7888e-06	5.2192e-06	5.5926e-06	4.1983e-06	6.8918e-06	3.7862e-06	7.3822e-06	4.9099e-06	5.3223e-06	3.8373e-06	6.6512e-06	4.139e-06	5.2635e-06	8.2929e-06	6.9526e-06
K01800	3.7719e-05	6.049e-06	2.1938e-05	2.3958e-05	5.6583e-05	7.0821e-05	4.6359e-05	6.1519e-05	2.2671e-05	3.2162e-05	2.5047e-05	6.7621e-05	1.9062e-05	5.7363e-05	3.1289e-05	5.0161e-05	5.2033e-05	5.1172e-05	4.1761e-05	2.4914e-05
K01801	5.0096e-06	4.8392e-06	5.3363e-06	6.2891e-06	5.9249e-06	3.7888e-06	4.6052e-06	6.1813e-06	6.4374e-06	6.6046e-06	6.9898e-06	8.2681e-06	4.6211e-06	6.2094e-06	4.4277e-06	5.8198e-06	5.6172e-06	4.971e-06	2.9618e-06	4.0557e-06
K01802	0.00035686	0.00031122	0.00030595	0.00041538	0.00027551	0.00029378	0.00029627	0.00038354	0.00032187	0.00025413	0.00038939	0.00038624	0.00023366	0.00021792	0.00026271	0.00025441	0.00026046	0.00037195	0.0002011	0.00036125
K01803	0.00047561	0.00045277	0.00047849	0.00045132	0.00039786	0.00045611	0.00047955	0.00042357	0.00047245	0.00048501	0.00042085	0.00044707	0.00048666	0.00043052	0.0004714	0.00044036	0.00042099	0.00048745	0.00045522	0.00044931
K01804	0.00012936	0.00022412	0.00012807	0.00017819	0.00016797	8.9182e-05	0.0001753	0.00010744	0.00015478	0.00010366	0.00015727	0.00015119	0.00010889	0.00010733	0.000165	0.00011584	0.00014102	0.00013539	0.00012647	0.00016223
K01805	0.00020421	0.00030245	0.00022057	0.00031296	0.00027284	0.00012998	0.00016394	0.00024019	0.00024126	0.00021221	0.0003192	0.00020139	0.00019669	0.00020491	0.00021312	0.00016185	0.00022794	0.00022311	0.00021947	0.00024276
K01807	0.00032061	0.00033421	0.00031365	0.00033931	0.00032676	0.00035527	0.00040648	0.00028316	0.00029024	0.00037043	0.00030639	0.00033899	0.00040608	0.00034181	0.00034093	0.00033339	0.00029741	0.00032166	0.0003406	0.00033054
K01808	0.00019744	0.00030003	0.00020841	0.00030008	0.00018338	0.00015767	0.00019004	0.00026374	0.00025638	0.00030151	0.00021756	0.00024479	0.00026311	9.6393e-05	0.00021046	0.00024055	0.00015403	0.00019855	0.00017149	0.00031142
K01809	0.00054781	0.00058827	0.00056298	0.00052798	0.00039726	0.00043892	0.00054495	0.00048038	0.0006748	0.00049133	0.00042813	0.00044441	0.00050399	0.0004249	0.00055671	0.00043538	0.00034974	0.00052576	0.00044337	0.00045308
K01810	0.00095918	0.00080966	0.00092051	0.0008077	0.0007261	0.00080905	0.00091367	0.00079209	0.00091047	0.00091172	0.00080354	0.00077336	0.00084335	0.0008223	0.00080643	0.00082807	0.00079379	0.00093134	0.00079345	0.00087459
K01811	0.00057669	0.00074554	0.00056861	0.00059656	0.00060493	0.00043892	0.00067328	0.00042828	0.00052339	0.00031587	0.0005755	0.00045297	0.00038846	0.00045979	0.00061869	0.00035362	0.00058152	0.0005512	0.00055059	0.00047365
K01812	0.00034242	0.00039651	0.00024962	0.00044233	0.00038216	0.00021858	0.000346	0.0003385	0.00025582	0.00027711	0.00031542	0.00035612	0.00038471	0.00026907	0.00041118	0.00036859	0.00015225	0.00028569	0.0002165	0.0003934
K01813	0.00014646	0.00024801	0.00016572	0.00021682	0.00019611	0.00015039	0.00018666	0.00012863	0.00023203	0.00018608	0.00017824	0.00016654	0.00022586	0.00012507	0.00019865	0.00019954	0.00017058	0.00017808	0.00021177	0.00022133
K01814	0.00030146	0.00027614	0.00027808	0.00032134	0.00026218	0.00024685	0.00032451	0.00026639	0.00026981	0.00029003	0.00027173	0.00031891	0.00029546	0.00030869	0.00029252	0.00026771	0.00027169	0.00027458	0.00029321	0.00031403
K01815	0.00020598	0.00021353	0.00016928	0.00021742	0.00022781	0.00013319	0.00021859	0.00015836	0.00018137	0.00015248	0.00020271	0.00014794	0.00015943	0.00015346	0.00020751	0.00017044	0.00016053	0.00020089	0.00017504	0.00018164
K01816	8.1921e-05	3.9016e-05	6.0478e-05	6.2292e-05	0.00012265	0.00012969	8.2279e-05	0.00013452	6.8012e-05	6.7769e-05	8.3296e-05	0.00012136	4.9388e-05	0.00011059	5.4018e-05	0.00012111	0.00013067	9.2403e-05	8.2929e-05	6.9816e-05
K01817	0.00025932	0.00024408	0.00023509	0.00025875	0.00021152	0.00022237	0.00028583	0.00024343	0.00021243	0.00026591	0.0002263	0.00025543	0.00024434	0.00023536	0.00023201	0.00018596	0.00023296	0.00024183	0.00022035	0.0002474
K01818	0.00032975	0.00028491	0.00028638	0.00027043	0.00023137	0.00022208	0.00020631	0.00034645	0.00043634	0.00018321	0.00025222	0.00019076	0.00014903	0.0001916	0.00024854	0.00024665	0.00019187	0.00028013	0.00018274	0.00022654
K01819	0.00021895	0.00017935	0.00023272	0.0001162	0.00014457	0.00026259	0.00020969	0.00013687	0.00025833	0.00019555	0.00013368	0.00012284	0.00021748	0.00022235	0.00022699	0.00016656	0.00015344	0.00020674	0.00020377	9.6468e-05
K01820	2.0628e-06	5.7466e-06	5.3363e-06	5.3906e-06	6.2211e-06	5.5375e-06	5.8332e-06	6.77e-06	3.9184e-06	6.0303e-06	6.1161e-06	5.0199e-06	5.1988e-06	6.2094e-06	5.3132e-06	5.2655e-06	6.5041e-06	3.509e-06	5.3312e-06	4.6351e-06
K01821	8.7814e-05	0.00010011	0.00011206	6.9479e-05	6.3693e-05	8.9765e-05	9.6402e-05	6.7111e-05	0.00011083	0.00012032	8.4461e-05	7.3232e-05	9.7332e-05	9.6097e-05	9.5047e-05	8.6188e-05	0.00010081	9.0356e-05	0.0001081	9.0095e-05
K01822	4.7149e-06	3.327e-06	5.6327e-06	5.0912e-06	8.2949e-06	4.9546e-06	5.8332e-06	5.887e-06	6.1575e-06	3.4459e-06	6.1161e-06	3.8388e-06	5.4876e-06	4.7309e-06	4.7228e-06	4.157e-06	3.252e-06	4.971e-06	5.9235e-06	6.663e-06
K01823	0.00031324	0.00038865	0.00038569	0.00035189	0.00029447	0.00037276	0.00036473	0.00027404	0.00039716	0.00037101	0.00032066	0.00030474	0.00045027	0.00033767	0.00039023	0.00030928	0.00028707	0.00031581	0.00040339	0.00031171
K01824	4.7149e-06	5.7466e-06	7.4115e-06	5.3906e-06	5.9249e-06	6.4118e-06	8.5963e-06	5.2983e-06	5.3178e-06	2.5844e-06	4.3686e-06	2.6576e-06	6.354e-06	6.5051e-06	5.3132e-06	4.4341e-06	4.4346e-06	7.3104e-06	3.8503e-06	6.3733e-06
K01825	8.1626e-05	9.7994e-05	8.2416e-05	9.0443e-05	0.0001813	0.0001431	4.7894e-05	0.00015895	0.00013686	9.7921e-05	0.00013485	0.00014174	9.0978e-05	0.00011768	7.2319e-05	0.00016101	0.00019808	0.00011784	0.00011047	0.00011935
K01826	4.3613e-05	2.7221e-05	3.3796e-05	3.9531e-05	6.0138e-05	8.5976e-05	8.1051e-05	5.6515e-05	1.9032e-05	3.2736e-05	4.689e-05	8.1795e-05	3.6969e-05	6.1502e-05	3.5717e-05	5.0992e-05	6.5928e-05	5.088e-05	3.9391e-05	4.6351e-05
K01827	7.367e-06	3.9319e-06	3.5575e-06	4.7917e-06	7.9986e-06	5.246e-06	7.6753e-06	5.5926e-06	6.9971e-06	7.1789e-06	3.2037e-06	6.7917e-06	5.4876e-06	3.2525e-06	4.7228e-06	4.7113e-06	5.3215e-06	4.971e-06	5.6273e-06	4.9248e-06
K01828	5.3042e-06	7.5613e-06	8.0044e-06	5.0912e-06	3.5549e-06	5.246e-06	7.6753e-06	3.8265e-06	5.5977e-06	4.8817e-06	6.6986e-06	3.8388e-06	4.6211e-06	5.0266e-06	4.4277e-06	3.8799e-06	4.7302e-06	5.8483e-06	3.5541e-06	5.2145e-06
K01829	5.5989e-06	4.2343e-06	6.5221e-06	4.1927e-06	3.8512e-06	6.1204e-06	5.5262e-06	5.2983e-06	2.519e-06	3.4459e-06	4.9511e-06	4.1341e-06	4.6211e-06	3.5482e-06	7.3794e-06	4.9884e-06	7.391e-06	6.1407e-06	6.2197e-06	5.2145e-06
K01830	4.7149e-06	4.8392e-06	4.1504e-06	5.9896e-06	5.3324e-06	4.3717e-06	5.2192e-06	5.2983e-06	4.7581e-06	6.8918e-06	4.9511e-06	5.3152e-06	5.4876e-06	6.2094e-06	5.6084e-06	3.3256e-06	2.9564e-06	3.8014e-06	4.7388e-06	4.9248e-06
K01831	6.7776e-06	3.9319e-06	4.1504e-06	4.1927e-06	7.9986e-06	6.7032e-06	6.4472e-06	5.5926e-06	6.4374e-06	6.0303e-06	6.4073e-06	3.8388e-06	3.7547e-06	2.0698e-06	4.4277e-06	4.157e-06	7.391e-06	5.2635e-06	2.9618e-06	6.0836e-06
K01832	4.7149e-06	2.4196e-06	2.3717e-06	5.3906e-06	5.6286e-06	3.7888e-06	6.7543e-06	7.9474e-06	4.7581e-06	3.4459e-06	5.8249e-06	3.2482e-06	4.9099e-06	5.618e-06	5.3132e-06	3.6027e-06	3.8433e-06	4.971e-06	3.5541e-06	4.3454e-06
K01833	5.3042e-06	4.5368e-06	4.1504e-06	4.4922e-06	5.6286e-06	3.2059e-06	7.6753e-06	4.4152e-06	5.5977e-06	4.0202e-06	3.4949e-06	5.9058e-06	4.3323e-06	5.618e-06	4.1325e-06	4.157e-06	3.8433e-06	6.1407e-06	5.035e-06	5.2145e-06
K01834	0.0013841	0.001844	0.0016824	0.001672	0.0013598	0.001487	0.0016444	0.0014082	0.0014019	0.0015794	0.0015748	0.0015712	0.0017615	0.0015041	0.001671	0.0012382	0.0015172	0.0013185	0.0016678	0.0016121
K01835	0.00063975	0.00048332	0.00069016	0.00047737	0.00061352	0.00057706	0.00057902	0.00055926	0.00067089	0.00054301	0.0006384	0.0005079	0.00051699	0.00063483	0.00063995	0.00061219	0.00059364	0.00065998	0.00062167	0.0005342
K01836	4.7149e-06	6.049e-06	5.0398e-06	7.487e-06	6.5174e-06	4.9546e-06	6.7543e-06	4.4152e-06	5.0379e-06	3.733e-06	3.7862e-06	4.1341e-06	5.7764e-06	4.7309e-06	5.9036e-06	3.3256e-06	6.5041e-06	7.0179e-06	4.4426e-06	5.5042e-06
K01837	3.8308e-06	4.5368e-06	6.5221e-06	6.888e-06	4.1474e-06	4.9546e-06	6.1402e-06	5.2983e-06	5.5977e-06	3.1587e-06	5.8249e-06	6.2011e-06	5.1988e-06	6.8007e-06	3.8373e-06	4.9884e-06	5.0259e-06	5.8483e-06	5.9235e-06	5.2145e-06
K01838	0.00010491	9.4365e-05	0.00013785	7.6068e-05	9.8353e-05	0.00011075	0.00012526	5.0922e-05	0.00016317	0.000114	0.00010922	8.1795e-05	0.00012593	0.00010674	0.00011807	0.00014245	0.0001085	0.00015001	0.00017326	0.00011501
K01839	0.00035303	0.00056286	0.00048353	0.00045671	0.00036645	0.00050653	0.00039359	0.00035116	0.00050016	0.00049994	0.00043628	0.0004075	0.00054414	0.0004249	0.00048114	0.00044702	0.00036985	0.00038131	0.0004413	0.00042875
K01840	0.00073169	0.0008387	0.00066792	0.00087568	0.00049739	0.00064992	0.00057043	0.00078709	0.00077249	0.00066333	0.00069432	0.00055839	0.00070356	0.00063099	0.00061486	0.00068535	0.00046859	0.00073396	0.00057073	0.00066166
K01841	4.2729e-05	5.0207e-05	1.9566e-05	6.9479e-05	6.1619e-05	1.6612e-05	7.092e-05	2.9729e-05	1.7633e-05	5.9442e-05	2.8833e-05	7.0869e-05	6.7006e-05	1.301e-05	7.3499e-05	4.4341e-05	9.1648e-06	1.9299e-05	2.1325e-05	6.8657e-05
K01842	4.7149e-06	6.049e-06	5.6327e-06	6.2891e-06	4.4437e-06	5.8289e-06	6.1402e-06	7.3587e-06	4.7581e-06	5.456e-06	4.0774e-06	4.1341e-06	2.5994e-06	5.3223e-06	6.1987e-06	5.8198e-06	4.4346e-06	6.4331e-06	3.2579e-06	4.9248e-06
K01843	0.00015824	0.00026434	0.00022175	0.00024887	0.00016708	0.00015534	0.00020324	0.00014129	0.00010496	0.00011687	0.00024872	0.00014558	0.00016954	0.00021082	0.00017297	7.2886e-05	0.00022883	0.00014358	0.00021739	0.00018251
K01844	5.5989e-06	2.4196e-06	4.7434e-06	3.8932e-06	6.2211e-06	4.3717e-06	3.6841e-06	2.9435e-06	4.1983e-06	4.3074e-06	5.5336e-06	3.8388e-06	6.354e-06	7.6878e-06	5.018e-06	4.157e-06	4.7302e-06	5.2635e-06	5.3312e-06	4.9248e-06
K01845	0.00066126	0.00078093	0.00073166	0.00071246	0.00064018	0.00065371	0.00074297	0.00079209	0.00065829	0.0008161	0.00064132	0.00078842	0.00076364	0.00071615	0.00067537	0.00068286	0.00080148	0.00067606	0.00070342	0.00080448
K01846	6.0409e-05	2.7826e-05	6.4332e-05	6.0495e-05	3.8512e-05	2.3316e-05	1.5658e-05	7.6531e-05	8.2566e-05	4.0202e-05	4.689e-05	4.9609e-05	4.6211e-05	3.9622e-05	6.612e-05	7.15e-05	3.252e-06	5.2342e-05	1.9548e-05	6.605e-05
K01847	0.0004818	0.00047152	0.00047938	0.00058219	0.00043696	0.00030602	0.00039697	0.00046389	0.0004842	0.00026074	0.00054725	0.00037856	0.00031568	0.00038882	0.00046727	0.00044092	0.00034028	0.00046903	0.00037259	0.00049625
K01848	1.4734e-05	7.8033e-05	5.3956e-05	9.194e-05	2.9921e-05	6.3244e-05	9.1182e-05	1.2657e-05	2.0432e-05	1.9527e-05	9.4072e-05	9.5969e-05	7.3938e-05	2.602e-05	5.4608e-05	1.5519e-05	4.4346e-05	4.6786e-05	3.7022e-05	8.8936e-05
K01849	7.9563e-06	2.3591e-05	2.2234e-05	2.6354e-05	1.2146e-05	2.5064e-05	4.0833e-05	1.0302e-05	1.3435e-05	7.7532e-06	2.6503e-05	3.1596e-05	2.5416e-05	9.1662e-06	1.9482e-05	7.2055e-06	1.8625e-05	1.5498e-05	1.9844e-05	3.3315e-05
K01850	4.597e-05	8.4686e-06	2.8164e-05	2.1563e-05	5.599e-05	6.0912e-05	4.728e-05	6.1224e-05	1.5114e-05	2.6706e-05	2.097e-05	5.6991e-05	2.2817e-05	4.9971e-05	2.6861e-05	4.2678e-05	5.0259e-05	4.4155e-05	4.0872e-05	1.7961e-05
K01851	3.9192e-05	1.1191e-05	1.8084e-05	2.276e-05	5.6879e-05	8.6851e-05	2.8552e-05	8.0946e-05	6.4374e-06	3.1587e-05	2.7959e-05	5.7581e-05	2.1661e-05	6.2389e-05	8.265e-06	4.8498e-05	8.4257e-05	4.24e-05	4.1168e-05	2.4334e-05
K01852	6.1883e-06	4.5368e-06	7.115e-06	5.0912e-06	5.9249e-06	6.1204e-06	6.7543e-06	4.1209e-06	6.1575e-06	4.5945e-06	5.5336e-06	5.0199e-06	3.4658e-06	7.0964e-06	5.3132e-06	4.9884e-06	4.139e-06	4.971e-06	5.9235e-06	4.9248e-06
K01853	6.1883e-06	3.6294e-06	5.3363e-06	6.5886e-06	5.3324e-06	5.246e-06	6.4472e-06	4.1209e-06	5.3178e-06	5.456e-06	4.0774e-06	4.7246e-06	6.0652e-06	5.9137e-06	4.4277e-06	5.5427e-06	3.8433e-06	5.8483e-06	3.8503e-06	5.2145e-06
K01854	0.00016797	0.00020325	0.00019477	0.00018238	0.0001419	0.00015592	0.00019065	0.00013864	0.00017577	8.4711e-05	0.00022804	0.00015178	0.00010253	0.00012034	0.00013696	7.732e-05	0.000183	0.00020703	0.00015608	0.0001602
K01855	5.0096e-06	3.9319e-06	5.9292e-06	5.0912e-06	6.5174e-06	7.869e-06	7.0613e-06	5.5926e-06	4.1983e-06	4.5945e-06	4.9511e-06	5.6105e-06	4.3323e-06	4.1396e-06	7.3794e-06	4.9884e-06	4.139e-06	4.0938e-06	4.4426e-06	4.9248e-06
K01856	7.5733e-05	8.7711e-06	3.6761e-05	3.0547e-05	8.7688e-05	0.00010725	7.9823e-05	0.00011244	3.2467e-05	4.5658e-05	4.1065e-05	9.8036e-05	2.8593e-05	8.9888e-05	4.1325e-05	8.0646e-05	9.2535e-05	7.6028e-05	5.657e-05	3.9688e-05
K01857	9.4297e-05	9.0735e-06	4.7434e-05	3.444e-05	0.00011287	0.00013931	9.9779e-05	0.00013393	4.1423e-05	5.7719e-05	4.922e-05	0.00012284	3.7835e-05	0.00011295	5.6379e-05	0.00010725	0.00010998	0.00011287	8.2929e-05	4.7799e-05
K01858	6.5714e-05	7.9545e-05	7.6783e-05	5.6302e-05	3.9401e-05	4.3134e-05	6.8771e-05	3.856e-05	4.3662e-05	2.0962e-05	4.1939e-05	1.7127e-05	6.6429e-06	6.4163e-05	3.2174e-05	1.0254e-05	6.5928e-05	6.0237e-05	5.9827e-05	2.4334e-05
K01859	4.7149e-06	4.5368e-06	4.7434e-06	5.0912e-06	6.8136e-06	5.246e-06	2.7631e-06	5.2983e-06	4.1983e-06	4.5945e-06	7.5723e-06	5.6105e-06	4.6211e-06	4.7309e-06	5.018e-06	6.3741e-06	4.139e-06	5.5559e-06	6.5159e-06	3.766e-06
K01860	6.1883e-06	6.9564e-06	5.3363e-06	3.8932e-06	6.5174e-06	5.5375e-06	3.9912e-06	8.2417e-06	4.7581e-06	3.1587e-06	4.9511e-06	6.2011e-06	7.7981e-06	7.0964e-06	5.3132e-06	6.0969e-06	7.0954e-06	3.8014e-06	5.9235e-06	3.766e-06
K01865	6.1883e-06	5.1417e-06	5.0398e-06	3.2943e-06	5.3324e-06	4.3717e-06	2.4561e-06	6.1813e-06	5.0379e-06	7.7532e-06	4.9511e-06	5.3152e-06	3.177e-06	6.5051e-06	5.018e-06	4.9884e-06	6.2084e-06	1.7545e-06	5.6273e-06	2.6072e-06
[truncated: 13,040 more rows]
