# Supplementary material for: Reconstructing the Genomic Content of Microbiome Taxa through Shotgun Metagenomic Deconvolution
Source: PLoS Comput Biol. 2013 Oct 17;9(10):e1003292. doi: 10.1371/journal.pcbi.1003292 (PMC3798274; doi:10.1371/journal.pcbi.1003292)
Supplement: Table S1 — Ribosomal genes used as constant genomic elements in the deconvolution of the Human Microbiome Project datasets. (XLS) [file pcbi.1003292.s016.xls]

## Sheet: Ribosomal KOs used in Eq. 5
KO	Length	Std./Mean Length
K02863	695.975	0.02877
K02867	436.293	0.05694
K02871	442.577	0.05784
K02874	372.501	0.04186
K02876	449.887	0.07505
K02886	823.48	0.03803
K02931	548.605	0.03755
K02933	538.506	0.0357
K02946	312.316	0.042
K02948	393.737	0.04852
K02950	390.029	0.07899
K02952	377.593	0.0934
K02986	611.517	0.04688
K02992	481.86	0.08124
K02994	397.437	0.02739
